# Supplementary material for: Copper-catalyzed silylation of propargyl carbonates: a general entry to allenylsilanes
Source: Royal Society of Chemistry journal article supplement (doi:10.1039/d3qo00371j), 2023-01-01

**Supporting Information for**  
**Copper-Catalyzed Silylation of Propargyl Carbonates: A General Entry to**  
**Allenylsilanes**

He Zhang<sup>a,b</sup>, Linjuan Jiang,<sup>c</sup> Mei Yang,<sup>a,b</sup> Yuanhong Liu<sup>\*, a,b</sup>

<sup>a</sup>Division of Molecular Catalysis and Synthesis, Henan Institute of Advanced Technology, Zhengzhou University, Zhengzhou 450001, P. R. China. <sup>b</sup>State Key Laboratory of Organometallic Chemistry, Shanghai Institute of Organic Chemistry, Chinese Academy of Sciences, 345 Lingling Lu, Shanghai 200032, People's Republic of China. <sup>c</sup>School of Chemistry and Molecular Engineering, East China University of Science and Technology, Shanghai 20023, P. R. China. E-mail: [yhliu@sioc.ac.cn](mailto:yhliu@sioc.ac.cn)

| <b>Contents:</b>                                                | <b>Page</b> |
|-----------------------------------------------------------------|-------------|
| General Methods                                                 | S1          |
| Synthesis and characterization of propargyl carbonates <b>1</b> | S2          |
| Optimization studies for the formation of <b>3a</b>             | S23         |
| Synthesis and characterization of products <b>3</b>             | S25         |
| Synthesis and characterization of products <b>4</b>             | S37         |
| Synthesis and characterization of product <b>5</b>              | S44         |
| 1 mmol Scale reaction of <b>1a</b>                              | S45         |
| References                                                      | S45         |
| NMR spectra                                                     | S47         |

**General Methods.**

Unless noted, all reactions were carried out using standard Schlenk technique under an argon atmosphere or a dry box technique under a nitrogen atmosphere. THF was distilled from sodium and benzophenone or purified using Innovative Technology Solvent Purifier (for the synthesis of substrates). 1,4-Dioxane was distilled from sodium and benzophenone. CuCl, NaHCO<sub>3</sub> and PPh<sub>3</sub> were purchased from J&K Chemical Company. PCy<sub>3</sub> was purchased from Alfa Chemical Company. Unless otherwise noted, all other reagents and starting materials were purchased from commercial sources. Triethyl(4,4,5,5-tetramethyl-1,3,2-dioxaborolan-2-yl)silane (Et<sub>3</sub>Si-Bpin) was prepared according to published method.<sup>1</sup>

$^1\text{H}$  and  $^{13}\text{C}$  NMR spectra were recorded at room temperature in  $\text{CDCl}_3$  (containing 0.03% TMS) solutions on Varian XL-400 MHz spectrometer, Agilent XL-400 MHz spectrometer or Bruker Avance III HD 400MHz spectrometer.  $^1\text{H}$  NMR spectra was recorded with tetramethylsilane (0.00 ppm) or solvent residual peak ( $\text{CDCl}_3$ : 7.26 ppm) as internal reference;  $^{13}\text{C}$  NMR spectra was recorded with  $\text{CDCl}_3$  (77.00 ppm) as internal reference. High-resolution mass spectra were obtained by using JEOL AccuTOF GCv4G GCT MS spectrometer, Agilent Technologies 7250 GCQTOF spectrometer, Thermo Scientific Q Exactive HF Orbitrap-FTMS and Thermo Fisher Scientific LTQ FTICR-MS. The IR spectra were measured on a ThermoFisher Nicolet FT-IR spectrometer.

### Synthesis and characterization of propargyl carbonates 1.

The propargyl carbonates were prepared from the corresponding propargyl alcohols.

**For the synthesis of propargyl carbonates 1a-1w, see the following:**

**Typical procedure for the synthesis of 1a.**

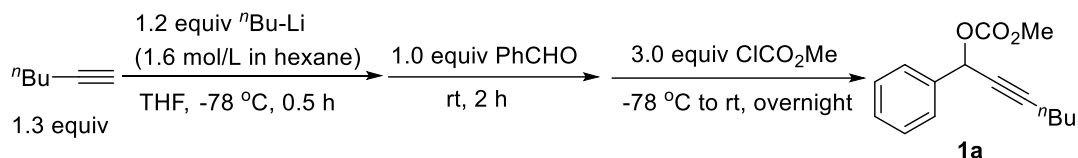

**Methyl (1-phenylhept-2-yn-1-yl) carbonate (1a).** 1-Hexyne (0.75 mL, 534.0 mg, 6.5 mmol) was deprotonated in dry THF (10 mL) by *n*-BuLi solution (1.6 M in hexane, 3.8 mL, 6 mmol) slowly at  $-78\text{ }^\circ\text{C}$  (using a dry ice/acetone bath) under argon. After the slow addition, the mixture was stirred at the same temperature for 30 minutes at  $-78\text{ }^\circ\text{C}$ . Then the dry ice/acetone bath was removed. To the mixture, benzaldehyde (0.51 mL, 530.6 mg, 5 mmol) was added. After the reaction was complete (2 h), the mixture was cooled to  $-78\text{ }^\circ\text{C}$ , and  $\text{ClCO}_2\text{Me}$  (1.42 g, 15 mmol) was slowly added. Then the dry ice/acetone bath was removed. The reaction was stirred overnight at room temperature until the reaction was complete as monitored by TLC. The mixture was quenched with saturated  $\text{NH}_4\text{Cl}$  solution and extracted with ethyl acetate. The combined organic layers were washed with water and brine and dried over anhydrous  $\text{Na}_2\text{SO}_4$ . Then the solvent was evaporated under the reduced pressure. Before the column chromatography, the column was alkalified using petroleum ether: triethylamine = 20: 1 as the eluent. Then the residue was purified by column chromatography on silica gel (eluent: petroleum ether: ethyl acetate = 15: 1) to afford the title product **1a** in 79% yield (970 mg) as

a light-yellow oil.  $^1\text{H}$  NMR (400 MHz,  $\text{CDCl}_3$ ):  $\delta$  7.53 (d,  $J = 6.4$  Hz, 2H), 7.38-7.35 (m, 3H), 6.29 (s, 1H), 3.77 (s, 3H), 2.26 (t,  $J = 6.8$  Hz, 2H), 1.55-1.37 (m, 4H), 0.90 (t,  $J = 7.2$  Hz, 3H).  $^{13}\text{C}$  NMR (100 MHz,  $\text{CDCl}_3$ ):  $\delta$  154.9, 137.0, 128.9, 128.5, 127.6, 89.4, 76.0, 70.1, 54.8, 30.3, 21.8, 18.4, 13.5. The spectroscopic data are in agreement with that previously reported.<sup>2</sup>

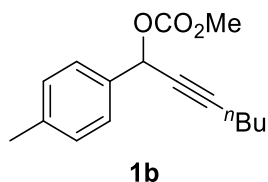

**Methyl (1-(*p*-tolyl)hept-2-yn-1-yl) carbonate (1b).** Before the column chromatography, the column was alkalified using petroleum ether: triethylamine = 20: 1 as the eluent. Then the residue was purified by column chromatography on silica gel (eluent: petroleum ether: ethyl acetate = 20: 1) to afford the title product **1b** in 88% yield (1.15 g) as a yellow oil.  $^1\text{H}$  NMR (400 MHz,  $\text{CDCl}_3$ ):  $\delta$  7.43 (d,  $J = 8.0$  Hz, 2H), 7.17 (d,  $J = 7.6$  Hz, 2H), 6.25 (s, 1H), 3.77 (s, 3H), 2.34 (s, 3H), 2.26 (td,  $J = 7.0, 2.0$  Hz, 2H), 1.53-1.50 (m, 2H), 1.45-1.39 (m, 2H), 0.90 (t,  $J = 7.2$  Hz, 3H).  $^{13}\text{C}$  NMR (100 MHz,  $\text{CDCl}_3$ ):  $\delta$  154.9, 138.9, 134.2, 129.2, 127.7, 89.1, 76.2, 70.1, 54.8, 30.4, 21.9, 21.1, 18.5, 13.5. IR (neat): 2957, 2234, 1746, 1515, 1440, 1321, 1248, 1181, 1143, 946, 917, 816, 789, 740, 723  $\text{cm}^{-1}$ . HRMS (FI)  $m/z$  :  $[\text{M}]^+$  Calcd for  $\text{C}_{16}\text{H}_{20}\text{O}_3$  260.1407; Found 260.1403.

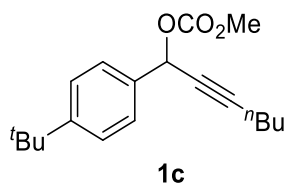

**1-(4-(*tert*-Butyl)phenyl)hept-2-yn-1-yl methyl carbonate (1c).** Before the column chromatography, the column was alkalified using petroleum ether: triethylamine = 20: 1 as the eluent. Then the residue was purified by column chromatography on silica gel (eluent: petroleum ether: ethyl acetate = 20: 1) to afford the title product **1c** in 66% yield (1.0 g) as a light-yellow oil.  $^1\text{H}$  NMR (400 MHz,  $\text{CDCl}_3$ ):  $\delta$  7.47 (d,  $J = 7.6$  Hz, 2H), 7.39 (d,  $J = 8.0$  Hz, 2H), 6.28 (s, 1H), 3.78 (s, 3H), 2.27 (t,  $J = 7.2$  Hz, 2H), 1.54-1.50 (m, 2H), 1.44-1.38 (m, 2H), 1.31 (s, 9H), 0.91 (t,  $J = 7.2$  Hz, 3H).  $^{13}\text{C}$  NMR (100 MHz,  $\text{CDCl}_3$ ):  $\delta$  155.0, 152.1, 134.0,

127.5, 125.5, 89.2, 76.2, 70.1, 54.9, 34.6, 31.2, 30.4, 21.9, 18.5, 13.6. IR (neat): 2958, 2871, 2236, 1747, 1440, 1321, 1250, 1146, 1107, 948, 919, 839, 788, 682  $\text{cm}^{-1}$ . HRMS (FI)  $m/z$ :  $[\text{M}]^+$  Calcd for  $\text{C}_{19}\text{H}_{26}\text{O}_3$  302.1876; Found 302.1881.

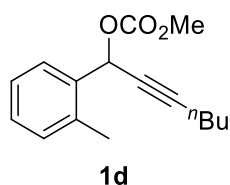

**Methyl (1-(*o*-tolyl)hept-2-yn-1-yl) carbonate (1d).** Before the column chromatography, the column was alkalified using petroleum ether: triethylamine = 20: 1 as the eluent. Then the residue was purified by column chromatography on silica gel (eluent: petroleum ether: ethyl acetate = 20: 1) to afford the title product **1d** in 88% yield (1.15 g) as a light-yellow oil.  $^1\text{H}$  NMR (400 MHz,  $\text{CDCl}_3$ ):  $\delta$  7.60 (d,  $J = 6.8$  Hz, 1H), 7.25-7.16 (m, 3H), 6.41 (s, 1H), 3.79 (s, 3H), 2.43 (s, 3H), 2.25 (td,  $J = 6.8, 1.6$  Hz, 2H), 1.54-1.49 (m, 2H), 1.42-1.35 (m, 2H), 0.89 (t,  $J = 7.2$  Hz, 3H).  $^{13}\text{C}$  NMR (100 MHz,  $\text{CDCl}_3$ ):  $\delta$  154.9, 136.1, 135.1, 130.7, 128.9, 127.9, 126.1, 89.2, 75.9, 68.2, 54.9, 30.4, 21.9, 19.0, 18.5, 13.5. The spectroscopic data are in agreement with that previously reported.<sup>3</sup>

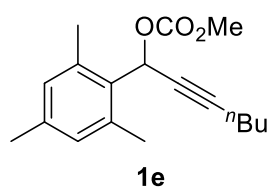

**1-Mesitylhept-2-yn-1-yl methyl carbonate (1e).** Before the column chromatography, the column was alkalified using petroleum ether: triethylamine = 20: 1 as the eluent. Then the residue was purified by column chromatography on silica gel (eluent: petroleum ether: ethyl acetate = 20: 1) to afford the title product **1e** in 72% yield (1.04 g) as a yellow oil.  $^1\text{H}$  NMR (400 MHz,  $\text{CDCl}_3$ ):  $\delta$  6.84 (s, 2H), 6.69 (s, 1H), 3.73 (s, 3H), 2.51 (s, 6H), 2.24 (s, 3H), 2.20 (td,  $J = 7.2, 2.0$  Hz, 2H), 1.49-1.34 (m, 4H), 0.88 (t,  $J = 7.2$  Hz, 3H).  $^{13}\text{C}$  NMR (100 MHz,  $\text{CDCl}_3$ ):  $\delta$  155.0, 138.2, 137.0, 130.8, 129.7, 88.3, 75.7, 66.2, 54.7, 30.3, 21.9, 20.8, 20.0, 18.5, 13.5. IR (neat): 2957, 1746, 1611, 1440, 1319, 1256, 1159, 1129, 1034, 920, 851, 793, 739, 695  $\text{cm}^{-1}$ . HRMS (FI)  $m/z$ :  $[\text{M}]^+$  Calcd for  $\text{C}_{18}\text{H}_{24}\text{O}_3$  288.1720; Found 288.1724.

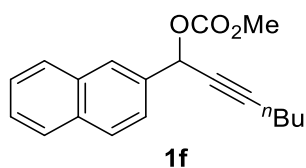

**Methyl (1-(naphthalen-2-yl)hept-2-yn-1-yl) carbonate (1f).** Before the column chromatography, the column was alkalified using petroleum ether: triethylamine = 20: 1 as the eluent. Then the residue was purified by column chromatography on silica gel (eluent: petroleum ether: ethyl acetate = 20: 1) to afford the title product **1f** in 72% yield (1.06 g) as a light-yellow oil. <sup>1</sup>H NMR (400 MHz, CDCl<sub>3</sub>): δ 7.99 (s, 1H), 7.86-7.81 (m, 3H), 7.64 (d, *J* = 8.0 Hz, 1H), 7.49-7.47 (m, 2H), 6.46 (s, 1H), 3.79 (s, 3H), 2.29 (t, *J* = 6.8 Hz, 2H), 1.56-1.37 (m, 4H), 0.90 (t, *J* = 7.2 Hz, 3H). <sup>13</sup>C NMR (100 MHz, CDCl<sub>3</sub>): δ 154.9, 134.3, 133.4, 132.9, 128.5, 128.2, 127.6, 127.0, 126.6, 126.3, 125.0, 89.7, 76.1, 70.3, 54.9, 30.3, 21.9, 18.5, 13.5. IR (neat): 2956, 2871, 2235, 1746, 1440, 1325, 1249, 1140, 1121, 925, 892, 859, 789, 746 cm<sup>-1</sup>. HRMS (FI) *m/z*: [M]<sup>+</sup> Calcd for C<sub>19</sub>H<sub>20</sub>O<sub>3</sub> 296.1407; Found 296.1410.

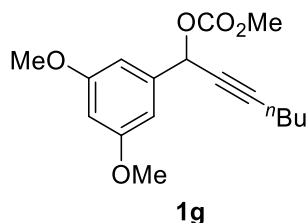

**1-(3,5-Dimethoxyphenyl)hept-2-yn-1-yl methyl carbonate (1g).** Before the column chromatography, the column was alkalified using petroleum ether: triethylamine = 20: 1 as the eluent. Then the residue was purified by column chromatography on silica gel (eluent: petroleum ether: ethyl acetate = 10: 1) to afford the title product **1g** in 89% yield (1.36 g) as a light-yellow oil. <sup>1</sup>H NMR (400 MHz, CDCl<sub>3</sub>): δ 6.69 (s, 2H), 6.44 (s, 1H), 6.22 (s, 1H), 3.79 (s, 9H), 2.27 (t, *J* = 6.8 Hz, 2H), 1.52-1.50 (m, 2H), 1.44-1.39 (m, 2H), 0.90 (t, *J* = 7.2 Hz, 3H). <sup>13</sup>C NMR (100 MHz, CDCl<sub>3</sub>): δ 160.7, 154.8, 139.1, 105.4, 101.0, 89.2, 75.9, 69.9, 55.2, 54.8, 30.2, 21.8, 18.4, 13.4. IR (neat): 2957, 2237, 1747, 1598, 1459, 1431, 1329, 1252, 1204, 1154, 1066, 916, 837, 788, 689 cm<sup>-1</sup>. HRMS (EI) *m/z*: [M]<sup>+</sup> Calcd for C<sub>17</sub>H<sub>22</sub>O<sub>5</sub> 306.1462; Found 306.1458.

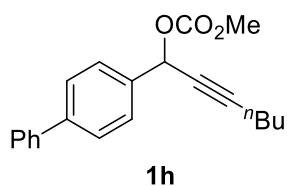

**1-((1,1'-Biphenyl)-4-yl)hept-2-yn-1-yl methyl carbonate (1h).** Before the column chromatography, the column was alkalified using petroleum ether: triethylamine = 20: 1 as the eluent. Then the residue was purified by column chromatography on silica gel (eluent: petroleum ether: ethyl acetate = 10: 1) to afford the title product **1h** in 68% yield (1.10 g) as a yellow oil.  $^1\text{H}$  NMR (400 MHz,  $\text{CDCl}_3$ ):  $\delta$  7.61-7.57 (m, 6H), 7.43 (t,  $J = 7.6$  Hz, 2H), 7.35 (t,  $J = 7.6$  Hz, 1H), 6.34 (s, 1H), 3.80 (s, 3H), 2.29 (t,  $J = 6.8$  Hz, 2H), 1.56-1.39 (m, 4H), 0.91 (t,  $J = 7.2$  Hz, 3H).  $^{13}\text{C}$  NMR (100 MHz,  $\text{CDCl}_3$ ):  $\delta$  155.0, 141.9, 140.5, 136.0, 128.8, 128.2, 127.5, 127.3, 127.1, 89.6, 76.0, 70.0, 54.9, 30.4, 21.9, 18.5, 13.5. The spectroscopic data are in agreement with that previously reported.<sup>3</sup>

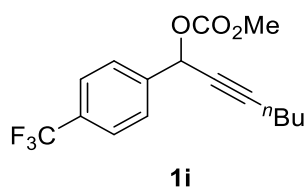

**Methyl (1-(4-(trifluoromethyl)phenyl)hept-2-yn-1-yl) carbonate (1i).** Before the column chromatography, the column was alkalified using petroleum ether: triethylamine = 20: 1 as the eluent. Then the residue was purified by column chromatography on silica gel (eluent: petroleum ether: ethyl acetate = 20: 1) to afford the title product **1i** in 85% yield (1.33 g) as a colorless oil.  $^1\text{H}$  NMR (400 MHz,  $\text{CDCl}_3$ ):  $\delta$  7.65 (t,  $J = 9.2$  Hz, 4H), 6.33 (s, 1H), 3.81 (s, 3H), 2.28 (t,  $J = 6.8$  Hz, 2H), 1.54-1.50 (m, 2H), 1.43-1.39 (m, 2H), 0.91 (t,  $J = 7.2$  Hz, 3H).  $^{13}\text{C}$  NMR (100 MHz,  $\text{CDCl}_3$ ):  $\delta$  154.8, 140.9, 131.0 (q,  $^2J_{\text{C-F}} = 32.3$  Hz), 127.9, 125.6 (q,  $^4J_{\text{C-F}} = 3.6$  Hz), 123.9 (d,  $^1J_{\text{C-F}} = 270.7$  Hz), 90.2, 75.4, 69.2, 55.1, 30.3, 21.9, 18.5, 13.5.  $^{19}\text{F}$  NMR (376 MHz,  $\text{CDCl}_3$ )  $\delta$  -62.8. IR (neat): 2960, 2236, 1750, 1622, 1442, 1323, 1252, 1165, 1125, 1110, 1066, 929, 836, 788  $\text{cm}^{-1}$ . HRMS (EI)  $m/z$ :  $[\text{M}]^+$  Calcd for  $\text{C}_{16}\text{H}_{17}\text{F}_3\text{O}_3$  314.1124; Found 314.1123.

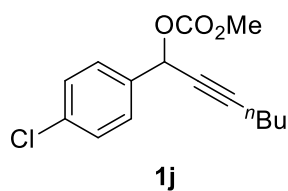

**1-(4-Chlorophenyl)hept-2-yn-1-yl methyl carbonate (1j).** Before the column chromatography, the column was alkalified using petroleum ether: triethylamine = 20: 1 as the eluent. Then the residue was purified by column chromatography on silica gel (eluent: petroleum ether: ethyl acetate = 20: 1) to afford the title product **1j** in 84% yield (1.18 g) as a light-yellow oil. <sup>1</sup>H NMR (400 MHz, CDCl<sub>3</sub>): δ 7.48 (d, *J* = 8.4 Hz, 2H), 7.34 (d, *J* = 8.0 Hz, 2H), 6.25 (s, 1H), 3.79 (s, 3H), 2.27 (td, *J* = 7.0, 2.0 Hz, 2H), 1.53-1.48 (m, 2H), 1.42-1.39 (m, 2H), 0.90 (t, *J* = 7.2 Hz, 3H). <sup>13</sup>C NMR (100 MHz, CDCl<sub>3</sub>): δ 154.8, 135.6, 134.9, 129.1, 128.7, 89.8, 75.6, 69.3, 54.9, 30.3, 21.9, 18.4, 13.5. IR (neat): 2957, 2873, 2236, 1747, 1492, 1440, 1321, 1248, 1145, 1089, 1017, 946, 922, 825, 788 cm<sup>-1</sup>. HRMS (FI) *m/z*: [M]<sup>+</sup> Calcd for C<sub>15</sub>H<sub>17</sub>O<sub>3</sub>Cl 280.0861; Found 280.0862.

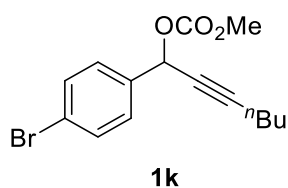

**1-(4-Bromophenyl)hept-2-yn-1-yl methyl carbonate (1k).** Before the column chromatography, the column was alkalified using petroleum ether: triethylamine = 20: 1 as the eluent. Then the residue was purified by column chromatography on silica gel (eluent: petroleum ether: ethyl acetate = 20: 1) to afford the title product **1k** in 87% yield (1.42 g) as a light-yellow oil. <sup>1</sup>H NMR (400 MHz, CDCl<sub>3</sub>): δ 7.50 (d, *J* = 8.0 Hz, 2H), 7.41 (d, *J* = 8.4 Hz, 2H), 6.23 (s, 1H), 3.79 (s, 3H), 2.26 (td, *J* = 7.0, 1.2 Hz, 2H), 1.53-1.49 (m, 2H), 1.40-1.37 (m, 2H), 0.90 (t, *J* = 7.2 Hz, 3H). <sup>13</sup>C NMR (100 MHz, CDCl<sub>3</sub>): δ 154.8, 136.1, 131.7, 129.3, 123.1, 89.8, 75.6, 69.4, 54.9, 30.2, 21.8, 18.4, 13.5. IR (neat): 2957, 2872, 2232, 1747, 1440, 1322, 1247, 1144, 1070, 1013, 946, 921, 819, 788, 741 cm<sup>-1</sup>. HRMS (EI) *m/z*: [M]<sup>+</sup> Calcd for C<sub>15</sub>H<sub>17</sub>BrO<sub>3</sub> 324.0356; Found 324.0347.

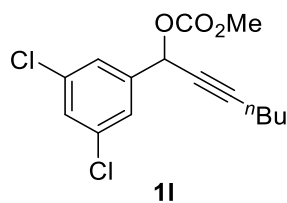

**1-(3,5-Dichlorophenyl)hept-2-yn-1-yl methyl carbonate (1l).** Before the column chromatography, the column was alkalified using petroleum ether: triethylamine = 20: 1 as the eluent. Then the residue was purified by column chromatography on silica gel (eluent: petroleum ether: ethyl acetate = 20: 1) to afford the title product **1l** in 88% yield (1.38 g) as a light-yellow oil.  $^1\text{H}$  NMR (400 MHz,  $\text{CDCl}_3$ ):  $\delta$  7.42 (s, 2H), 7.34 (s, 1H), 6.21 (s, 1H), 3.82 (s, 3H), 2.28 (td,  $J = 7.6, 1.6$  Hz, 2H), 1.55-1.51 (m, 2H), 1.45-1.38 (m, 2H), 0.92 (t,  $J = 7.2$  Hz, 3H).  $^{13}\text{C}$  NMR (100 MHz,  $\text{CDCl}_3$ ):  $\delta$  154.6, 140.2, 135.1, 129.0, 126.1, 90.5, 74.9, 68.5, 55.2, 30.2, 21.9, 18.4, 13.5. IR (neat): 2958, 2873, 2236, 1749, 1591, 1572, 1439, 1253, 1201, 1148, 942, 914, 861, 788, 680  $\text{cm}^{-1}$ . HRMS (EI)  $m/z$ :  $[\text{M}]^+$  Calcd for  $\text{C}_{15}\text{H}_{16}\text{Cl}_2\text{O}_3$  314.0471; Found 314.0465.

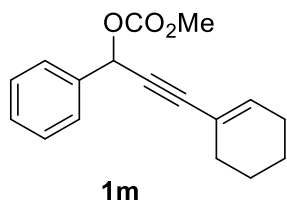

**3-(Cyclohex-1-en-1-yl)-1-phenylprop-2-yn-1-yl methyl carbonate (1m).** Before the column chromatography, the column was alkalified using petroleum ether: triethylamine = 20: 1 as the eluent. Then the residue was purified by column chromatography on silica gel (eluent: petroleum ether: ethyl acetate = 20: 1) to afford the title product **1m** in 83% yield (1.12 g) as a colorless oil.  $^1\text{H}$  NMR (400 MHz,  $\text{CDCl}_3$ ):  $\delta$  7.55 (d,  $J = 7.6$  Hz, 2H), 7.38-7.35 (m, 3H), 6.42 (s, 1H), 6.19 (s, 1H), 3.79 (s, 3H), 2.13-2.09 (m, 4H), 1.61-1.57 (m, 4H).  $^{13}\text{C}$  NMR (100 MHz,  $\text{CDCl}_3$ ):  $\delta$  154.9, 136.8, 136.6, 129.0, 128.6, 127.7, 119.7, 89.9, 82.1, 70.3, 54.9, 28.8, 25.6, 22.1, 21.3. IR (neat): 2930, 2223, 1746, 1439, 1322, 1249, 1211, 1189, 1049, 939, 907, 842, 788, 767, 695  $\text{cm}^{-1}$ . HRMS (FI)  $m/z$ :  $[\text{M}]^+$  Calcd for  $\text{C}_{17}\text{H}_{18}\text{O}_3$  270.1250; Found 270.1252.



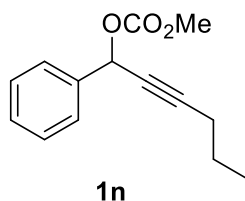

**Methyl (1-phenylhex-2-yn-1-yl) carbonate (1n).** Before the column chromatography, the column was alkalified using petroleum ether: triethylamine = 20: 1 as the eluent. Then the residue was purified by column chromatography on silica gel (eluent: petroleum ether: ethyl acetate = 20: 1) to afford the title product **1n** in 95% yield (1.10 g) as a colorless oil. <sup>1</sup>H NMR (400 MHz, CDCl<sub>3</sub>): δ 7.54 (d, *J* = 7.2 Hz, 2H), 7.37-7.36 (m, 3H), 6.30 (s, 1H), 3.78 (s, 3H), 2.25 (t, *J* = 5.2 Hz, 2H), 1.58-1.53 (m, 2H), 0.98 (t, *J* = 7.2 Hz, 3H). <sup>13</sup>C NMR (100 MHz, CDCl<sub>3</sub>): δ 154.9, 137.0, 128.9, 128.5, 127.6, 89.3, 76.2, 70.1, 54.9, 21.7, 20.7, 13.4. IR (neat): 2962, 2236, 1746, 1496, 1440, 1322, 1248, 1143, 1029, 931, 909, 788, 762, 695 cm<sup>-1</sup>. HRMS (EI) *m/z*: [M]<sup>+</sup> Calcd for C<sub>14</sub>H<sub>16</sub>O<sub>3</sub> 232.1094; Found 232.1090.

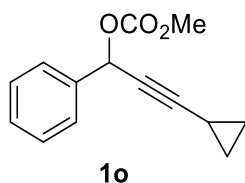

**3-Cyclopropyl-1-phenylprop-2-yn-1-yl methyl carbonate (1o).** Before the column chromatography, the column was alkalified using petroleum ether: triethylamine = 20: 1 as the eluent. Then the residue was purified by column chromatography on silica gel (eluent: petroleum ether: ethyl acetate = 20: 1) to afford the title product **1o** in 58% yield (668.0 mg) as a colorless oil. <sup>1</sup>H NMR (400 MHz, CDCl<sub>3</sub>): δ 7.52-7.50 (m, 2H), 7.37-7.35 (m, 3H), 6.26 (s, 1H), 3.78 (s, 3H), 1.32-1.28 (m, 1H), 0.80-0.73 (m, 4H). <sup>13</sup>C NMR (100 MHz, CDCl<sub>3</sub>): δ 154.9, 137.0, 128.9, 128.5, 127.6, 92.4, 71.2, 70.2, 54.9, 8.3, -0.5. IR (neat): 3011, 2240, 1745, 1496, 1440, 1320, 1248, 1158, 1048, 930, 907, 893, 788, 768, 696 cm<sup>-1</sup>. HRMS (EI) *m/z*: [M]<sup>+</sup> Calcd for C<sub>14</sub>H<sub>14</sub>O<sub>3</sub> 230.0937; Found 230.0933.

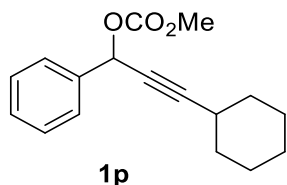

**3-Cyclohexyl-1-phenylprop-2-yn-1-yl methyl carbonate (1p).** Before the column chromatography, the column was alkalified using petroleum ether: triethylamine = 20: 1 as the eluent. Then the residue was purified by column chromatography on silica gel (eluent: petroleum ether: ethyl acetate = 20: 1) to afford the title product **1p** in 76% yield (831.0 mg) as a colorless oil.  $^1\text{H}$  NMR (400 MHz,  $\text{CDCl}_3$ ):  $\delta$  7.55 (d,  $J = 7.2$  Hz, 2H), 7.37-7.35 (m, 3H), 6.32 (s, 1H), 3.77 (s, 3H), 2.46 (m, 1H), 1.80-1.78 (m, 2H), 1.69 (bs, 2H), 1.49-1.43 (m, 3H), 1.32-1.30 (m, 3H).  $^{13}\text{C}$  NMR (100 MHz,  $\text{CDCl}_3$ ):  $\delta$  154.9, 137.1, 128.9, 128.5, 127.7, 93.3, 76.0, 70.2, 54.8, 32.2, 29.0, 25.7, 24.7. IR (neat): 2929, 2854, 2235, 1746, 1440, 1323, 1249, 1151, 931, 909, 890, 788, 762, 713, 695  $\text{cm}^{-1}$ . HRMS (EI)  $m/z$ :  $[\text{M}]^+$  Calcd for  $\text{C}_{17}\text{H}_{20}\text{O}_3$  272.1407; Found 272.1401.

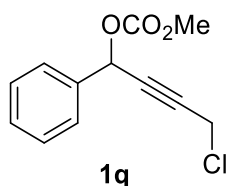

**4-Chloro-1-phenylbut-2-yn-1-yl methyl carbonate (1q).** Before the column chromatography, the column was alkalified using petroleum ether: triethylamine = 20: 1 as the eluent. Then the residue was purified by column chromatography on silica gel (eluent: petroleum ether: ethyl acetate = 20: 1) to afford the title product **1q** in 64% yield (763.0 mg) as a light-yellow oil.  $^1\text{H}$  NMR (400 MHz,  $\text{CDCl}_3$ ):  $\delta$  7.52 (d,  $J = 4.8$  Hz, 2H), 7.38 (d,  $J = 5.2$  Hz, 3H), 6.33 (s, 1H), 4.18 (s, 2H), 3.79 (s, 3H).  $^{13}\text{C}$  NMR (100 MHz,  $\text{CDCl}_3$ ):  $\delta$  154.6, 135.7, 129.3, 128.7, 127.6, 82.9, 82.1, 69.3, 55.1, 29.9. IR (neat): 2957, 1747, 1440, 1323, 1245, 1148, 936, 913, 860, 787, 763, 695  $\text{cm}^{-1}$ . HRMS (FI)  $m/z$ :  $[\text{M}]^+$  Calcd for  $\text{C}_{12}\text{H}_{11}\text{O}_3\text{Cl}$  238.0391; Found 238.0395.

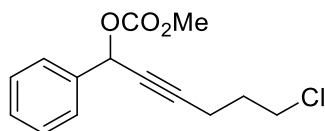

**1r**

**6-Chloro-1-phenylhex-2-yn-1-yl methyl carbonate (1r).** Before the column chromatography, the column was alkalified using petroleum ether: triethylamine = 20: 1 as the eluent. Then the residue was purified by column chromatography on silica gel (eluent: petroleum ether: ethyl acetate = 10: 1) to afford the title product **1r** in 91% yield (1.22 g) as a light-yellow oil.  $^1\text{H}$  NMR (400 MHz,  $\text{CDCl}_3$ ):  $\delta$  7.52 (d,  $J$  = 6.8 Hz, 2H), 7.38-7.36 (m, 3H), 6.28 (s, 1H), 3.78 (s, 3H), 3.61 (t,  $J$  = 6.4 Hz, 2H), 2.46 (t,  $J$  = 6.8 Hz, 2H), 2.00-1.95 (m, 2H).  $^{13}\text{C}$  NMR (100 MHz,  $\text{CDCl}_3$ ):  $\delta$  154.8, 136.6, 129.0, 128.5, 127.5, 87.2, 77.2, 69.8, 54.9, 43.4, 30.9, 16.2. IR (neat): 2957, 2235, 1746, 1440, 1322, 1248, 1197, 1138, 931, 910, 788, 762, 695  $\text{cm}^{-1}$ . HRMS (EI)  $m/z$ :  $[\text{M}]^+$  Calcd for  $\text{C}_{14}\text{H}_{15}\text{ClO}_3$  266.0704; Found 266.0705.

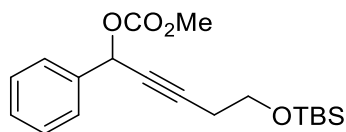

**1s**

**5-((tert-Butyldimethylsilyl)oxy)-1-phenylpent-2-yn-1-yl methyl carbonate (1s).** Before the column chromatography, the column was alkalified using petroleum ether: triethylamine = 20: 1 as the eluent. Then the residue was purified by column chromatography on silica gel (eluent: petroleum ether: ethyl acetate = 20: 1) to afford the title product **1s** in 41% yield (361.0 mg) as a light-yellow oil.  $^1\text{H}$  NMR (400 MHz,  $\text{CDCl}_3$ ):  $\delta$  7.53 (d,  $J$  = 7.6 Hz, 2H), 7.37-7.36 (m, 3H), 6.29 (s, 1H), 3.79 (s, 3H), 3.74 (t,  $J$  = 7.2 Hz, 2H), 2.49 (t,  $J$  = 8.4 Hz, 2H), 0.88 (s, 9H), 0.05 (s, 6H).  $^{13}\text{C}$  NMR (100 MHz,  $\text{CDCl}_3$ ):  $\delta$  154.9, 136.8, 129.0, 128.5, 127.7, 86.3, 77.1, 70.0, 61.4, 54.9, 25.8, 23.2, 18.2, -5.4. IR (neat): 2954, 2929, 2856, 1749, 1440, 1323, 1250, 1144, 1103, 1057, 932, 910, 834, 776, 695  $\text{cm}^{-1}$ . HRMS (EI)  $m/z$ :  $[\text{M}]^+$  Calcd for  $\text{C}_{19}\text{H}_{28}\text{O}_4\text{Si}$  348.1751; Found 348.1750.

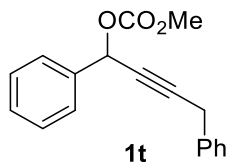

**1,4-Diphenylbut-2-yn-1-yl methyl carbonate (1t).** Before the column chromatography, the column was alkalified using petroleum ether: triethylamine = 20: 1 as the eluent. Then the residue was purified by column chromatography on silica gel (eluent: petroleum ether: ethyl acetate = 20: 1) to afford the title product **1t** in 88% yield (491.0 mg) as a colorless oil.  $^1\text{H}$  NMR (400 MHz,  $\text{CDCl}_3$ ):  $\delta$  7.56 (d,  $J = 7.6$  Hz, 2H), 7.37-7.30 (m, 7H), 7.24-7.21 (m, 1H), 6.36 (s, 1H), 3.78 (s, 3H), 3.69 (s, 2H).  $^{13}\text{C}$  NMR (100 MHz,  $\text{CDCl}_3$ ):  $\delta$  154.9, 136.7, 135.8, 129.1, 128.6, 128.5, 127.8, 127.7, 126.7, 86.6, 78.3, 70.0, 54.9, 25.1. IR (neat): 3031, 2956, 1746, 1495, 1454, 1440, 1322, 1249, 1197, 1139, 933, 910, 787, 731, 694  $\text{cm}^{-1}$ . HRMS (FI)  $m/z$ :  $[\text{M}]^+$  Calcd for  $\text{C}_{18}\text{H}_{16}\text{O}_3$  280.1094; Found 280.1100.

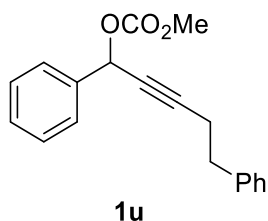

**1,5-Diphenylpent-2-yn-1-yl methyl carbonate (1u).** Before the column chromatography, the column was alkalified using petroleum ether: triethylamine = 20: 1 as the eluent. Then the residue was purified by column chromatography on silica gel (eluent: petroleum ether: ethyl acetate = 20: 1) to afford the title product **1u** in 89% yield (521.0 mg) as a colorless oil.  $^1\text{H}$  NMR (400 MHz,  $\text{CDCl}_3$ ):  $\delta$  7.47-7.45 (m, 2H), 7.34-7.33 (m, 3H), 7.28-7.25 (m, 2H), 7.22-7.17 (m, 3H), 6.27 (s, 1H), 3.77 (s, 3H), 2.83 (t,  $J = 7.6$  Hz, 2H), 2.56 (t,  $J = 7.2$  Hz, 2H).  $^{13}\text{C}$  NMR (100 MHz,  $\text{CDCl}_3$ ):  $\delta$  154.9, 140.2, 136.7, 128.9, 128.5, 128.4, 128.3, 127.6, 126.3, 88.4, 76.9, 70.0, 54.9, 34.5, 21.0. The spectroscopic data are in agreement with that previously reported.<sup>4</sup>



**Methyl (3-methyl-1-phenylnon-4-yn-3-yl) carbonate (1x).** 1-Hexyne (985.8 mg, 12 mmol) was deprotonated in dry THF (10 mL) by *n*-BuLi solution (1.6 M in hexane, 6.9 mL, 11 mmol) slowly at -78 °C (using a dry ice/acetone bath) under argon. After the slow addition, the mixture was stirred for 30 minutes at -78 °C. Then to the mixture, 4-phenylbutan-2-one (1.48 g, 10 mmol) was added, and then the dry ice/acetone bath was removed. The mixture was stirred at room temperature for 2 h. The resulting reaction mixture was quenched with saturated NH<sub>4</sub>Cl solution and extracted with ethyl acetate. The combined organic extracts were washed with brine, then dried over anhydrous Na<sub>2</sub>SO<sub>4</sub>. The solvent was evaporated under the reduced pressure to afford the product of alcohol, which was used directly without further purification for the next step.

The above crude alcohol was deprotonated in dry THF (26 mL) by *n*-BuLi solution (1.6 M in hexane, 7.5 mL, 12 mmol) slowly at -78 °C (using a dry ice/acetone bath) under argon. After the slow addition, the mixture was stirred for 30 minutes at -78 °C. Then to the mixture, ClCO<sub>2</sub>Me (1.42 g, 15 mmol) was added, and then the dry ice/acetone bath was removed. The reaction mixture was stirred at room temperature until the reaction was complete as monitored by TLC (2 h). The resulting reaction mixture was quenched with water and extracted with ethyl acetate. The combined organic extracts were washed with brine, then dried over anhydrous Na<sub>2</sub>SO<sub>4</sub>. The mixture was concentrated and the solvent was evaporated under the reduced pressure. The residue was purified by column chromatography on silica gel (eluent: petroleum ether: ethyl acetate = 20: 1) to afford the title product **1x** in 90% overall yield (2.6 g) as a colorless oil. <sup>1</sup>H NMR (400 MHz, CDCl<sub>3</sub>): δ 7.27 (q, *J* = 7.6 Hz, 2H), 7.22-7.17 (m, 3 H), 3.76 (s, 3H), 2.83 (t, *J* = 8.4 Hz, 2H), 2.30-2.23 (m, 3H), 2.11-2.04 (m, 1H), 1.74 (s, 3H), 1.54-1.40 (m, 4H), 0.92 (t, *J* = 7.2 Hz, 3H). <sup>13</sup>C NMR (100 MHz, CDCl<sub>3</sub>): δ 153.5, 141.6, 128.40, 128.38, 125.9, 86.8, 79.4, 77.7, 54.2, 43.7, 30.8, 30.6, 26.7, 21.9, 18.4, 13.6. The spectroscopic data are in agreement with that previously reported.<sup>6</sup>

**For the synthesis of new propargyl carbonates 1y and 1za, see the following:**

**Typical procedure for the synthesis of 1y:**

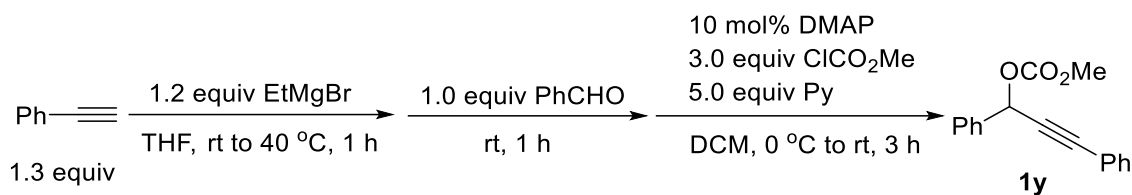

**1,3-Diphenylprop-2-yn-1-yl methyl carbonate (1y).** To a solution of phenylacetylene (3.98 g, 39.0 mmol) in THF (60 mL) was added dropwise EtMgBr (3.0 M solution in Et<sub>2</sub>O, 12.0 mL, 36.0 mmol) at room temperature under argon. Then the mixture was warmed up to 40 °C and stirred for 1 h. After cooling to room temperature, benzaldehyde (3.18 g, 30 mmol) was added and the reaction mixture was stirred until the reaction was complete as monitored by TLC (1 h). The resulting reaction mixture was quenched with saturated NH<sub>4</sub>Cl solution and extracted with ethyl acetate. The combined organic extracts were washed with water and brine, then dried over anhydrous Na<sub>2</sub>SO<sub>4</sub>. The solvent was evaporated under the reduced pressure to afford the product of alcohol, which was used directly without further purification for the next step.

To a solution of the above crude alcohol in DCM (60 mL) were added pyridine (12.1 mL, 150.0 mmol) and DMAP (366.5 mg, 3.0 mmol) under air. The solution was cooled to 0 °C, ClCO<sub>2</sub>Me (7.0 mL, 90.0 mmol) was added dropwise. The reaction mixture was warmed to room temperature and stirred for 3 h. The mixture was quenched with water and extracted with dichloromethane. The combined organic layers were dried over anhydrous Na<sub>2</sub>SO<sub>4</sub>. The mixture was concentrated and the solvent was evaporated under the reduced pressure. The residue was purified by column chromatography on silica gel (eluent: petroleum ether: ethyl acetate = 10: 1) to afford the title product **1y** in 75% overall yield (6.0 g) as a light-yellow oil. <sup>1</sup>H NMR (400 MHz, CDCl<sub>3</sub>): δ 7.63-7.61 (m, 2H), 7.48-7.46 (m, 2H), 7.41-7.37 (m, 3H), 7.32-7.29 (m, 3H), 6.53 (s, 1H), 3.81 (s, 3H). <sup>13</sup>C NMR (100 MHz, CDCl<sub>3</sub>): δ 154.9, 136.5, 131.9, 129.2, 128.9, 128.7, 128.2, 127.8, 121.9, 88.0, 84.8, 70.2, 55.0. The spectroscopic data are in agreement with that previously reported.<sup>7</sup>

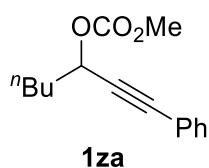

**Methyl (1-phenylhept-1-yn-3-yl) carbonate (1za).** First step: phenylacetylene (1.99 g, 19.5

mmol) and EtMgBr (3.0 M solution in Et<sub>2</sub>O, 6.0 mL, 18.0 mmol) in THF (30 mL) was stirred at 40 °C for 1 h, and after valeraldehyde (1.29 g, 15.0 mmol) was added, the reaction mixture was stirred at room temperature for 1 h. Second step: To a solution of the above crude alcohol in DCM (30 mL) were added pyridine (6.0 mL, 75.0 mmol) and DMAP (183.3 mg, 1.5 mmol), ClCO<sub>2</sub>Me (3.5 mL, 45.0 mmol) was added at 0 °C and then stirred at room temperature. Then saturated ammonium chloride solution and CuSO<sub>4</sub>·5H<sub>2</sub>O were added to the reaction mixture. The mixture was filtered and extracted with dichloromethane, washed with water and brine, dried over anhydrous Na<sub>2</sub>SO<sub>4</sub>, and concentrated in vacuo. The residue was purified by column chromatography on silica gel (eluent: petroleum ether: ethyl acetate = 15: 1) to afford the title product **1za** in 54% overall yield (2.0 g) as a yellow oil. <sup>1</sup>H NMR (400 MHz, CDCl<sub>3</sub>): δ 7.45-7.43 (m, 2H), 7.31-7.26 (m, 3H), 5.46 (t, *J* = 6.4 Hz, 1H), 3.82 (s, 3H), 1.94-1.86 (m, 2H), 1.55-1.47 (m, 2H), 1.42-1.36 (m, 2H), 0.94 (t, *J* = 7.6 Hz, 3H). <sup>13</sup>C NMR (100 MHz, CDCl<sub>3</sub>): δ 155.0, 131.8, 128.6, 128.2, 122.2, 86.0, 85.8, 68.7, 54.8, 34.6, 27.0, 22.2, 13.9. The spectroscopic data are in agreement with that previously reported.<sup>5</sup>

**For the synthesis of new propargyl carbonates **1z**, **1zb**, **1zc**, see the following:**

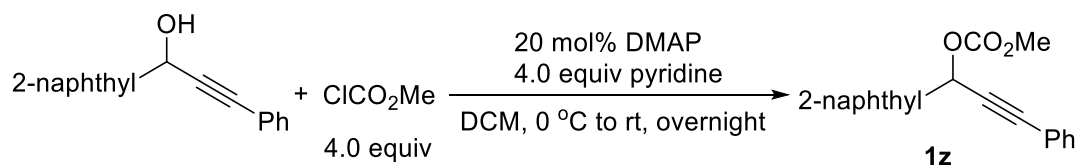

**Methyl (1-(naphthalen-2-yl)-3-phenylprop-2-yn-1-yl) carbonate (1z).** Methyl chloroformate (755.9 mg, 8.0 mmol) was added to a solution of 1-(naphthalen-2-yl)-3-phenylprop-2-yn-1-ol (516.6 mg, 2.0 mmol), pyridine (632.8 mg, 8.0 mmol), and DMAP (48.9 mg, 0.4 mmol) in CH<sub>2</sub>Cl<sub>2</sub> (10 mL) at 0 °C. The resulting mixture was stirred overnight at room temperature. The resulting solution was quenched with a saturated aqueous CuSO<sub>4</sub>·5H<sub>2</sub>O solution, washed with water and brine, dried over anhydrous Na<sub>2</sub>SO<sub>4</sub>, and concentrated in vacuo. The residue was purified by column chromatography on silica gel (eluent: petroleum ether: ethyl acetate = 10: 1) to afford the title product **1z** in 55% yield (346.2 mg) as a yellow oil. <sup>1</sup>H NMR (400 MHz, CDCl<sub>3</sub>): δ 8.06 (s, 1H), 7.88-7.80 (m, 3H), 7.72 (d, *J* = 8.4 Hz, 1H), 7.49-7.47 (m, 4H), 7.30-7.29 (m, 3H), 6.71 (s, 1H), 3.80 (s, 3H). <sup>13</sup>C NMR (100 MHz, CDCl<sub>3</sub>): δ 154.9, 133.7, 133.5, 132.9, 131.8, 128.9, 128.7, 128.3, 128.2, 127.6, 127.2, 126.7, 126.4,



124.9, 121.8, 88.2, 84.8, 70.3, 55.0. IR (neat): 3058, 2228, 1746, 1490, 1440, 1326, 1248, 1165, 1125, 1033, 923, 859, 788, 754, 690  $\text{cm}^{-1}$ . HRMS (ESI)  $m/z$ :  $[\text{M}+\text{Na}]^+$  Calcd for  $\text{C}_{21}\text{H}_{16}\text{O}_3\text{Na}$  339.0992; Found 330.0993.

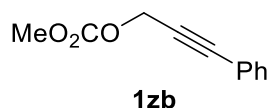

**Methyl (3-phenylprop-2-yn-1-yl) carbonate (1zb).** The residue was purified by column chromatography on silica gel (eluent: petroleum ether: ethyl acetate = 30: 1) to afford the title product **1zb** in 85% yield (812.0 mg) as a colorless oil.  $^1\text{H}$  NMR (400 MHz,  $\text{CDCl}_3$ ):  $\delta$  7.45 (dd,  $J = 7.6, 2.0$  Hz, 2H), 7.33-7.30 (m, 3H), 4.96 (s, 2H), 3.82 (s, 3H).  $^{13}\text{C}$  NMR (100 MHz,  $\text{CDCl}_3$ ):  $\delta$  155.2, 131.8, 128.8, 128.2, 121.9, 87.1, 82.2, 56.1, 55.0. The spectroscopic data are in agreement with that previously reported.<sup>8</sup>

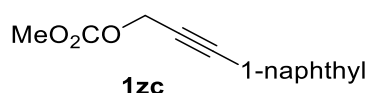

**Methyl (3-(naphthalen-1-yl)prop-2-yn-1-yl) carbonate (1zc).** The residue was purified by column chromatography on silica gel (eluent: petroleum ether: ethyl acetate = 10: 1) to afford the title product **1zc** in 85% yield (407.8 mg) as a yellow oil.  $^1\text{H}$  NMR (400 MHz,  $\text{CDCl}_3$ ):  $\delta$  8.30 (d,  $J = 8.4$  Hz, 1H), 7.82 (d,  $J = 8.0$  Hz, 1H), 7.69 (d,  $J = 7.2$  Hz, 1H), 7.57 (t,  $J = 6.8$  Hz, 1H), 7.50 (t,  $J = 7.6$  Hz, 1H), 7.40 (t,  $J = 8.4$  Hz, 1H), 5.11 (s, 2H), 3.84 (s, 3H).  $^{13}\text{C}$  NMR (100 MHz,  $\text{CDCl}_3$ ):  $\delta$  155.3, 133.2, 133.0, 131.0, 129.3, 128.2, 126.9, 126.4, 125.9, 125.0, 119.5, 87.0, 85.2, 56.3, 55.1. IR (neat): 3058, 2961, 2226, 1744, 1449, 1431, 1367, 1274, 1253, 1104, 958, 932, 901, 799, 772  $\text{cm}^{-1}$ . HRMS (EI)  $m/z$ :  $[\text{M}+\text{H}]^+$  Calcd for  $\text{C}_{15}\text{H}_{13}\text{O}_3$  241.0859; Found 241.0860.

**For the synthesis of propargyl carbonate 1zd, see the following:**

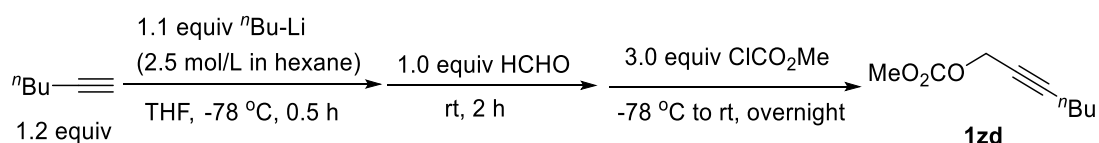

**Hept-2-yn-1-yl methyl carbonate (1zd).** 1-Hexyne (1.4 mL, 985.8 mg, 12 mmol) was

deprotonated in dry THF (20 mL) by *n*-BuLi solution (2.5 M in hexane, 4.4 mL, 11 mmol) slowly at -78 °C under argon. After the slow addition, the mixture was stirred for 30 minutes. To the mixture, HCHO (300.0 mg, 10 mmol) was added under nitrogen, and then the mixture was stirred at room temperature for 2 h. After the reaction was complete, ClCO<sub>2</sub>Me (2.84 g, 30 mmol) was slowly added at -78 °C under argon. The reaction mixture was stirred overnight at room temperature until the reaction was complete as monitored by TLC. The mixture was quenched with saturated NH<sub>4</sub>Cl solution and extracted with ethyl acetate. The combined organic layers were washed with water and brine and dried over anhydrous Na<sub>2</sub>SO<sub>4</sub>. The mixture was concentrated and the solvent was evaporated under the reduced pressure. Before the column chromatography, the column was alkalified using petroleum ether: triethylamine = 20: 1 as the eluent. Then the residue was purified by column chromatography on silica gel (eluent: petroleum ether: ethyl acetate = 30: 1) to afford the title product **1zd** in 79% yield (1.34 g) as a colorless oil. <sup>1</sup>H NMR (400 MHz, CDCl<sub>3</sub>): δ 4.72 (t, *J* = 2.0 Hz, 2H), 3.81 (s, 3H), 2.22 (t, *J* = 6.8 Hz, 2 H), 1.53-1.37 (m, 4H), 0.91 (t, *J* = 7.6 Hz, 3H). <sup>13</sup>C NMR (100 MHz, CDCl<sub>3</sub>): δ 155.3, 88.5, 73.3, 56.2, 54.9, 30.3, 21.8, 18.4, 13.5. The spectroscopic data are in agreement with that previously reported.<sup>4</sup>

**For the synthesis of propargyl carbonates 1ze – 1zf, 1zh – 1zj, and 1zm, see the following:**

**Typical procedure for the synthesis of 1ze.**

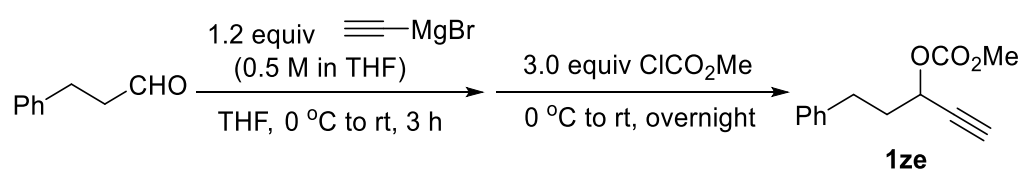

**Methyl (5-phenylpent-1-yn-3-yl) carbonate (1ze).** To a schlenk tube were added 3-phenylpropanal (0.66 mL, 670.9 mg, 5 mmol), THF (10 mL), then the solution was cooled to 0 °C and ethynylmagnesium bromide was added (0.5 M in THF, 12 mL, 6 mmol). After the reaction was stirred at room temperature for 3 h, ClCO<sub>2</sub>Me (1.42 g, 15 mmol) was slowly added at 0 °C under argon. The reaction mixture was stirred overnight at room temperature until the reaction was complete as monitored by TLC. The mixture was quenched with saturated NH<sub>4</sub>Cl solution and extracted with ethyl acetate. The combined organic layers were washed with water and brine and dried over anhydrous Na<sub>2</sub>SO<sub>4</sub>. The solvent was evaporated under the reduced

pressure. Before the column chromatography, the column was alkalified using petroleum ether: triethylamine = 20: 1 as the eluent. Then the residue was purified by column chromatography on silica gel (eluent: petroleum ether: ethyl acetate = 10: 1) to afford the title product **1ze** in 57% yield (622.0 mg) as a light-yellow oil. <sup>1</sup>H NMR (400 MHz, CDCl<sub>3</sub>): δ 7.31-7.28 (m, 2H), 7.25-7.19 (m, 3H), 5.20 (td, *J* = 6.6, 2.0 Hz, 1H), 3.82 (s, 3H), 2.81 (t, *J* = 6.8 Hz, 2H), 2.57 (d, *J* = 2.0 Hz, 1H), 2.19-2.11 (m, 2H). <sup>13</sup>C NMR (100 MHz, CDCl<sub>3</sub>): δ 154.8, 140.3, 128.5, 128.4, 126.2, 80.2, 74.9, 67.1, 55.0, 36.1, 30.9. The spectroscopic data are in agreement with that previously reported.<sup>9</sup>

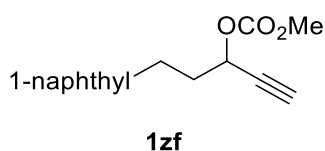

**Methyl (5-(naphthalen-1-yl)pent-1-yn-3-yl) carbonate (1zf).** Before the column chromatography, the column was alkalified using petroleum ether: triethylamine = 20: 1 as the eluent. Then the residue was purified by column chromatography on silica gel (eluent: petroleum ether: ethyl acetate = 5: 1) to afford the title product **1zf** in 61% yield (812.0 mg) as a yellow oil. <sup>1</sup>H NMR (400 MHz, CDCl<sub>3</sub>): δ 8.03 (d, *J* = 8.4 Hz, 1H), 7.85 (d, *J* = 7.6 Hz, 1H), 7.73 (d, *J* = 8.0 Hz, 1H), 7.54-7.46 (m, 2H), 7.39 (t, *J* = 7.2 Hz, 1H), 7.33 (d, *J* = 6.4 Hz, 1H), 5.29 (td, *J* = 6.4, 2.0 Hz, 1H), 3.82 (s, 3H), 3.30-3.24 (m, 2H), 2.61 (d, *J* = 2.0 Hz, 1H), 2.31-2.24 (m, 2H). <sup>13</sup>C NMR (100 MHz, CDCl<sub>3</sub>): δ 154.9, 136.4, 133.9, 131.6, 128.8, 127.1, 126.1, 126.0, 125.54, 125.52, 123.4, 80.2, 75.0, 67.4, 55.0, 35.3, 28.0. IR (neat): 3286, 2956, 1747, 1597, 1510, 1441, 1396, 1344, 1257, 1180, 1031, 1004, 944, 777 cm<sup>-1</sup>. HRMS (EI) *m/z*: [M]<sup>+</sup> Calcd for C<sub>17</sub>H<sub>16</sub>O<sub>3</sub> 268.1094; Found 268.1083.

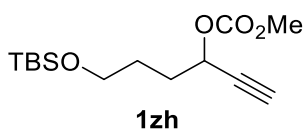

**6-((tert-Butyldimethylsilyloxy)hex-1-yn-3-yl) methyl carbonate (1zh).** Before the column chromatography, the column was alkalified using petroleum ether: triethylamine = 20: 1 as the eluent. Then the residue was purified by column chromatography on silica gel (eluent:

petroleum ether: ethyl acetate = 20: 1) to afford the title product **1zh** in 52% yield (506.0 mg) as a light-yellow oil.  $^1\text{H}$  NMR (400 MHz,  $\text{CDCl}_3$ ):  $\delta$  5.26 (td,  $J = 6.8, 2.0$  Hz, 1H), 3.81 (s, 3H), 3.65 (t,  $J = 6.0$  Hz, 2H), 2.52 (d,  $J = 2.0$  Hz, 1H), 1.93-1.88 (m, 2H), 1.73-1.68 (m, 2H), 0.89 (s, 9H), 0.05 (s, 6H).  $^{13}\text{C}$  NMR (100 MHz,  $\text{CDCl}_3$ ):  $\delta$  154.9, 80.5, 74.4, 67.7, 62.2, 54.8, 31.3, 27.9, 25.9, 18.2, -5.4. The spectroscopic data are in agreement with that previously reported.<sup>10</sup>

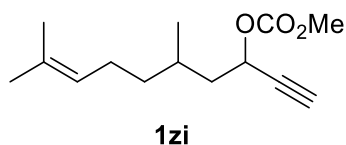

**5,9-Dimethyldec-8-en-1-yn-3-yl methyl carbonate (1zi).** Before the column chromatography, the column was alkalified using petroleum ether: triethylamine = 20: 1 as the eluent. Then the residue was purified by column chromatography on silica gel (eluent: petroleum ether: ethyl acetate = 10: 1) to afford the title product **1zi** in 28% yield (338.0 mg) as a yellow oil.  $^1\text{H}$  NMR (400 MHz,  $\text{CDCl}_3$ ):  $\delta$  5.27 (m, 1H), 5.08 (t,  $J = 6.8$  Hz, 1H), 3.81 (s, 3H), 2.52 (s, 1H), 2.03-1.83 (m, 3H), 1.68 (m, 5H), 1.60 (m, 3H), 1.41-1.35 (m, 1H), 1.24-1.19 (m, 1H), 0.95 (d,  $J = 6.4$  Hz, 3H).  $^{13}\text{C}$  NMR (100 MHz,  $\text{CDCl}_3$ ):  $\delta$  155.0, 154.9, 131.4, 124.3, 80.9, 80.6, 74.49, 74.48, 74.20, 74.19, 66.8, 66.3, 54.91, 54.88, 41.8, 41.4, 36.8, 36.7, 29.0, 28.7, 25.6, 25.2, 25.1, 19.3, 19.2, 17.59, 17.58. IR (neat): 3294, 2959, 2917, 1749, 1442, 1379, 1342, 1259, 1109, 962, 925, 790, 667  $\text{cm}^{-1}$ . HRMS (FI)  $m/z$ :  $[\text{M}]^+$  Calcd for  $\text{C}_{14}\text{H}_{22}\text{O}_3$  238.1563; Found 238.1562.

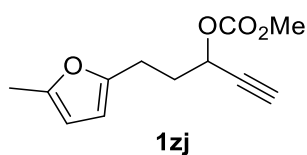

**Methyl (5-(5-methylfuran-2-yl)pent-1-yn-3-yl) carbonate (1zj).** Before the column chromatography, the column was alkalified using petroleum ether: triethylamine = 20: 1 as the eluent. Then the residue was purified by column chromatography on silica gel (eluent: petroleum ether: ethyl acetate = 5: 1) to afford the title product **1zj** in 73% yield (811.0 mg) as a colorless oil.  $^1\text{H}$  NMR (400 MHz,  $\text{CDCl}_3$ ):  $\delta$  5.89 (s, 1H), 5.84 (s, 1H), 5.23 (t,  $J = 6.8$  Hz, 1H), 3.81 (s, 3H), 2.77 (t,  $J = 7.6$  Hz, 2H), 2.54 (s, 1H), 2.24 (s, 3H), 2.17-2.12 (m, 2H).  $^{13}\text{C}$  NMR (100 MHz,  $\text{CDCl}_3$ ):  $\delta$  154.8, 152.0, 150.7, 106.1, 105.9, 80.1, 74.8, 66.9, 55.0, 33.1, 23.4,

13.4. IR (neat): 3288, 2957, 1749, 1570, 1442, 1258, 1018, 942, 784  $\text{cm}^{-1}$ . HRMS (EI)  $m/z$ :  $[\text{M}]^+$  Calcd for  $\text{C}_{12}\text{H}_{14}\text{O}_4$  222.0887; Found 222.0883.

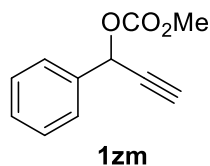

**Methyl (1-phenylprop-2-yn-1-yl) carbonate (1zm).** Before the column chromatography, the column was alkalified using petroleum ether: triethylamine = 20: 1 as the eluent. Then the residue was purified by column chromatography on silica gel (eluent: petroleum ether: ethyl acetate = 10: 1) to afford the title product **1zm** in 73% yield (1.39 g) as a light-yellow oil.  $^1\text{H}$  NMR (400 MHz,  $\text{CDCl}_3$ ):  $\delta$  7.56-7.55 (m, 2H), 7.40-7.39 (m, 3H), 6.29 (d,  $J = 2.0$  Hz, 1H), 3.81 (s, 3H), 2.73 (d,  $J = 2.0$  Hz, 1H).  $^{13}\text{C}$  NMR (100 MHz,  $\text{CDCl}_3$ ):  $\delta$  154.7, 135.7, 129.3, 128.7, 127.6, 79.5, 76.4, 69.2, 55.1. The spectroscopic data are in agreement with that previously reported.<sup>11</sup>

**For the synthesis of propargyl carbonate 1zg, see the following:**

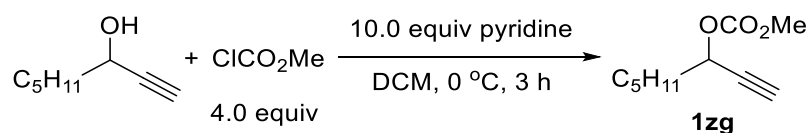

**Methyl oct-1-yn-3-yl carbonate (1zg).** To a stirred solution of propargyl alcohol (0.73 mL, 631.0 mg, 5 mmol) and pyridine (4.5 mL, 3.96 g, 50 mmol) in dichloromethane (50 mL) was added dropwise  $\text{ClCO}_2\text{Me}$  (1.89 g, 20 mmol) at 0  $^\circ\text{C}$ . Then the mixture was stirred for 3 h at room temperature. The mixture was quenched with saturated  $\text{NH}_4\text{Cl}$  solution and extracted with DCM. The combined organic layers were washed with water and brine and dried over anhydrous  $\text{Na}_2\text{SO}_4$ . The solvent was evaporated under the reduced pressure. The residue was purified by column chromatography on silica gel (eluent: petroleum ether: ethyl acetate = 10: 1) to afford the title product **1zg** in 91% yield (834.0 mg) as a yellow oil.  $^1\text{H}$  NMR (400 MHz,  $\text{CDCl}_3$ ):  $\delta$  5.20 (t,  $J = 6.8$  Hz, 1H), 3.81 (s, 3H), 2.52 (s, 1H), 1.85-1.79 (m, 2H), 1.51-1.44 (m, 2H), 1.34-1.32 (m, 4H), 0.90 (t,  $J = 6.4$  Hz, 3H).  $^{13}\text{C}$  NMR (100 MHz,  $\text{CDCl}_3$ ):  $\delta$  154.9, 80.5, 74.3, 67.8, 54.8, 34.5, 31.1, 24.3, 22.3, 13.8. The spectroscopic data are in agreement with that

previously reported.<sup>12</sup>

**For the synthesis of propargyl carbonate 1zk, see the following:**

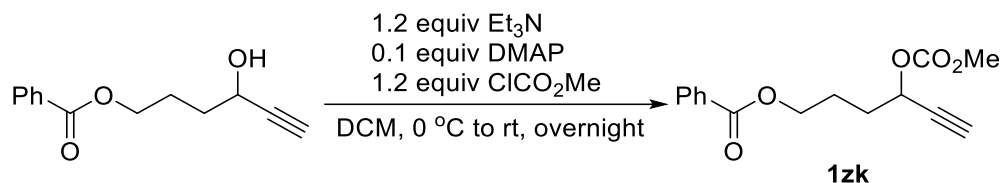

**4-((Methoxycarbonyl)oxy)hex-5-yn-1-yl benzoate (1zk).** Under an argon atmosphere, to a dried Schlenk tube equipped with a stirring bar were added 4-hydroxyhex-5-yn-1-yl benzoate (589.0 mg, 2.7 mmol), DCM (6 mL) and  $\text{Et}_3\text{N}$  (0.45 mL, 3.24 mmol). Then DMAP (33.0 mg, 0.27 mmol) was added at 0 °C. The reaction mixture was stirred at 0 °C for 2 h, then  $\text{ClCO}_2\text{Me}$  (306.2 mg, 3.24 mmol) was added. The reaction mixture was stirred at room temperature overnight. Then the mixture was quenched with saturated  $\text{NH}_4\text{Cl}$  aqueous solution, extracted with ethyl acetate. The combined organic phase was washed with brine, dried over anhydrous  $\text{Na}_2\text{SO}_4$ , filtered and concentrated in vacuo. Before the column chromatography, the column was alkalified using petroleum ether: triethylamine = 20: 1 as the eluent. Then the residue was purified by column chromatography on silica gel (eluent: petroleum ether: ethyl acetate = 5: 1) to afford the title product **1zk** in 34% yield (253.6 mg) as a colorless oil.  $^1\text{H}$  NMR (400 MHz,  $\text{CDCl}_3$ ):  $\delta$  8.06-8.03 (m, 2H), 7.58-7.55 (m, 1H), 7.45 (t,  $J$  = 7.6 Hz, 2H), 5.33-5.30 (m, 1H), 4.37 (t,  $J$  = 5.6 Hz, 2H), 3.81 (s, 3H), 2.57 (d,  $J$  = 2.4 Hz, 1H), 2.01-2.00 (m, 4H).  $^{13}\text{C}$  NMR (100 MHz,  $\text{CDCl}_3$ ):  $\delta$  166.4, 154.8, 132.9, 130.1, 129.5, 128.3, 79.9, 74.9, 67.2, 64.1, 55.0, 31.3, 24.2. The spectroscopic data are in agreement with that previously reported.<sup>10</sup>

**For the synthesis of propargyl carbonate 1zl, see the following:**

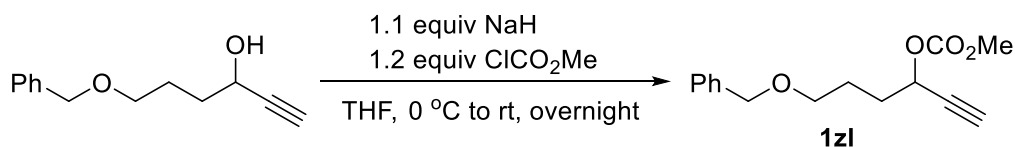

**6-(Benzyloxy)hex-1-yn-3-yl methyl carbonate (1zl).** Under an argon atmosphere, to a dried Schlenk tube equipped with a stirring bar was added 6-(benzyloxy)hex-1-yn-3-ol (572.0 mg, 2.8 mmol) and THF (6 mL). After the mixture was cooled down to 0 °C, NaH (60% dispersion

in mineral oil) (123.2 mg, 3.08 mmol) was added in portions. The reaction mixture was stirred at same temperature for 30 min. Then ClCO<sub>2</sub>Me (317.5 mg, 3.36 mmol) was added. The reaction mixture was stirred at room temperature overnight. Then the mixture was quenched with saturated NH<sub>4</sub>Cl aqueous solution, extracted with ethyl acetate. The combined organic phase was washed with brine, dried over anhydrous Na<sub>2</sub>SO<sub>4</sub>, filtered and concentrated in vacuo. Before the column chromatography, the column was alkalified using petroleum ether: triethylamine = 20: 1 as the eluent. Then the residue was purified by column chromatography on silica gel (eluent: petroleum ether: ethyl acetate = 5: 1) to afford the title product **1zI** in 72% yield (531.9 mg) as a colorless oil. <sup>1</sup>H NMR (400 MHz, CDCl<sub>3</sub>): δ 7.37-7.28 (m, 5H), 5.25 (td, *J* = 6.6, 2.0 Hz, 1H), 4.50 (s, 2H), 3.80 (s, 3H), 3.51 (t, *J* = 6.0 Hz, 2H), 2.52 (d, *J* = 1.6 Hz, 1H), 1.98-1.92 (m, 2H), 1.84-1.77 (m, 2H). <sup>13</sup>C NMR (100 MHz, CDCl<sub>3</sub>): δ 154.9, 138.3, 128.3, 127.6, 127.5, 80.3, 74.6, 72.8, 69.3, 67.6, 54.9, 31.5, 25.0. The spectroscopic data are in agreement with that previously reported.<sup>10</sup>

### **Optimization studies for the formation of 3a.**

#### **General procedure for optimization studies.**

The reaction was conducted in an oven-dried screw-cap vial (volume: 4 mL) equipped with a magnetic stir bar. In a nitrogen-filled glove box, Cu catalyst (0.02 mmol), ligand (0.02 mmol), base, Et<sub>3</sub>Si-Bpin (0.4 mmol, 96.9 mg), solvent (1 mL) were added sequentially to a screw-cap vial. The mixture was stirred for 1 minute, and **1a** (0.2 mmol, 49.3 mg) was added. The vial cap was then securely fitted and taken outside the glove box. After the reaction mixture was stirred at 80 °C in an oil bath for 24 h, the mixture was cooled down to room temperature, filtered through a pad of silica gel and washed with ethyl acetate. The solvent was evaporated under the reduced pressure and the yields were determined by <sup>1</sup>H NMR using 1,3,5-trimethylbenzene (1.0 equiv., 24.0 mg) in CDCl<sub>3</sub> as the internal standard.

#### **Table S1. Optimization studies for the formation of 3a.**

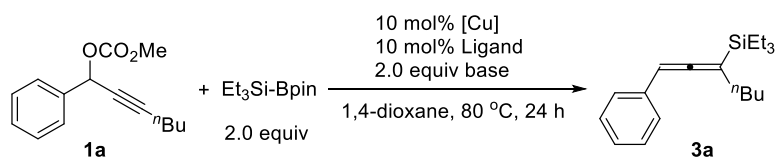

| entry           | [Cu]                                                                  | ligand                         | base                            | solvent            | Temp (°C) | time (h) | NMR yield (%) <sup>a</sup> |
|-----------------|-----------------------------------------------------------------------|--------------------------------|---------------------------------|--------------------|-----------|----------|----------------------------|
| 1               | CuCl                                                                  | PPh <sub>3</sub>               | NaHCO <sub>3</sub>              | 1,4-dioxane        | 80        | 24       | 88                         |
| 2               | CuCl                                                                  | PPhCy <sub>2</sub>             | NaHCO <sub>3</sub>              | 1,4-dioxane        | 80        | 24       | 90                         |
| <b>3</b>        | <b>CuCl</b>                                                           | <b>PCy<sub>3</sub></b>         | <b>NaHCO<sub>3</sub></b>        | <b>1,4-dioxane</b> | 80        | 24       | <b>91</b>                  |
| 4               | CuCl                                                                  | P( <i>p</i> -tol) <sub>3</sub> | NaHCO <sub>3</sub>              | 1,4-dioxane        | 80        | 24       | 70                         |
| 5               | CuCl                                                                  | <sup>t</sup> BuXphos           | NaHCO <sub>3</sub>              | 1,4-dioxane        | 80        | 24       | 13                         |
| 6               | CuCl                                                                  | dppe                           | NaHCO <sub>3</sub>              | 1,4-dioxane        | 80        | 24       | 63                         |
| 7               | CuCl                                                                  | dppf                           | NaHCO <sub>3</sub>              | 1,4-dioxane        | 80        | 24       | 67                         |
| 8               | CuCl                                                                  | DPEphos                        | NaHCO <sub>3</sub>              | 1,4-dioxane        | 80        | 24       | 25                         |
| 9               | CuCl                                                                  | Xantphos                       | NaHCO <sub>3</sub>              | 1,4-dioxane        | 80        | 24       | 68                         |
| 10              | CuCl                                                                  | DCype                          | NaHCO <sub>3</sub>              | 1,4-dioxane        | 80        | 24       | 68                         |
| 11              | CuCl                                                                  | IMes                           | NaHCO <sub>3</sub>              | 1,4-dioxane        | 80        | 24       | 50                         |
| 12              | CuCl                                                                  | IPr                            | NaHCO <sub>3</sub>              | 1,4-dioxane        | 80        | 24       | 46                         |
| 13              | CuCl                                                                  | PCy <sub>3</sub>               | KO <sup>t</sup> Bu              | 1,4-dioxane        | 80        | 24       | 0                          |
| 14              | CuCl                                                                  | PCy <sub>3</sub>               | NaO <sup>t</sup> Bu             | 1,4-dioxane        | 80        | 24       | 0                          |
| 15              | CuCl                                                                  | PCy <sub>3</sub>               | LiO <sup>t</sup> Bu             | 1,4-dioxane        | 80        | 24       | 82                         |
| 16              | CuCl                                                                  | PCy <sub>3</sub>               | NaOMe                           | 1,4-dioxane        | 80        | 24       | 74                         |
| 17              | CuCl                                                                  | PCy <sub>3</sub>               | K <sub>3</sub> PO <sub>4</sub>  | 1,4-dioxane        | 80        | 24       | 87                         |
| 18              | CuCl                                                                  | PCy <sub>3</sub>               | Na <sub>2</sub> CO <sub>3</sub> | 1,4-dioxane        | 80        | 24       | 79                         |
| 19              | [Cu(MeCN) <sub>4</sub> ] <sup>+</sup> [PF <sub>6</sub> ] <sup>-</sup> | PCy <sub>3</sub>               | NaHCO <sub>3</sub>              | 1,4-dioxane        | 80        | 24       | 77                         |
| 20              | Cu(OAc) <sub>2</sub>                                                  | PCy <sub>3</sub>               | NaHCO <sub>3</sub>              | 1,4-dioxane        | 80        | 24       | 81                         |
| 21              | Cu(OTf) <sub>2</sub>                                                  | PCy <sub>3</sub>               | NaHCO <sub>3</sub>              | 1,4-dioxane        | 80        | 24       | 64                         |
| 22              | CuCl                                                                  | PCy <sub>3</sub>               | NaHCO <sub>3</sub>              | THF                | 80        | 24       | 80                         |
| 23              | CuCl                                                                  | PCy <sub>3</sub>               | NaHCO <sub>3</sub>              | toluene            | 80        | 24       | 75                         |
| 24              | CuCl                                                                  | PCy <sub>3</sub>               | NaHCO <sub>3</sub>              | MeCN               | 80        | 24       | 49                         |
| 25              | CuCl                                                                  | PCy <sub>3</sub>               | NaHCO <sub>3</sub>              | DMF                | 80        | 24       | 13                         |
| 26              | -                                                                     | PCy <sub>3</sub>               | NaHCO <sub>3</sub>              | 1,4-dioxane        | 80        | 24       | 0                          |
| 27              | CuCl                                                                  | -                              | NaHCO <sub>3</sub>              | 1,4-dioxane        | 80        | 24       | 0                          |
| 28              | CuCl                                                                  | PCy <sub>3</sub>               | -                               | 1,4-dioxane        | 80        | 24       | 13                         |
| 29              | CuCl                                                                  | PCy <sub>3</sub>               | NaHCO <sub>3</sub>              | 1,4-dioxane        | 50        | 24       | trace                      |
| 30              | CuCl                                                                  | PCy <sub>3</sub>               | NaHCO <sub>3</sub>              | 1,4-dioxane        | rt        | 24       | 0                          |
| 31              | CuCl                                                                  | PCy <sub>3</sub>               | NaHCO <sub>3</sub> <sup>b</sup> | 1,4-dioxane        | 80        | 24       | 77                         |
| 32              | CuCl                                                                  | PCy <sub>3</sub>               | NaHCO <sub>3</sub> <sup>c</sup> | 1,4-dioxane        | 80        | 24       | 79                         |
| 33 <sup>d</sup> | CuCl                                                                  | PCy <sub>3</sub>               | NaHCO <sub>3</sub>              | 1,4-dioxane        | 80        | 24       | 63                         |

<sup>a</sup>0.2 mmol scale. NMR yields. <sup>b</sup>1.5 equiv of base was used. <sup>c</sup>1.0 equiv of base was used. <sup>d</sup>1.5 equiv Et<sub>3</sub>Si-Bpin was used.



### Synthesis of allenylsilanes 3.

#### Typical procedure for the synthesis of 3a.

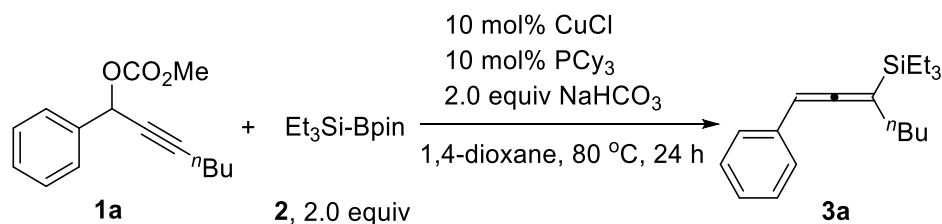

**Triethyl(1-phenylhepta-1,2-dien-3-yl)silane (3a).** In the nitrogen-filled glove box, CuCl (0.03 mmol, 3.0 mg), PCy<sub>3</sub> (0.03 mmol, 8.4 mg), NaHCO<sub>3</sub> (0.6 mmol, 50.4 mg), Et<sub>3</sub>SiBpin (0.6 mmol, 145.3 mg), 1,4-dioxane (1.5 mL) was added to screw-cap vial (4 mL). The solvent stirred at ambient temperature for 1 minute. Then **1a** (0.3 mmol, 73.9 mg) was added. The vial was sealed with a screw cap featuring a PTFE/silicone septum and taken outside the glove box. The vial was immersed into an oil bath preheated at 80 °C. After the reaction mixture was stirred at 80 °C for 24 h. The mixture was filtered over a silica gel pad and washed with ethyl acetate. The solvent was evaporated under the reduced pressure. Purification by silica gel plate (eluent: petroleum ether) afforded the title product **3a** in 80% yield (69.0 mg) as a yellow oil. <sup>1</sup>H NMR (400 MHz, CDCl<sub>3</sub>): δ 7.27-7.21 (m, 4H), 7.10 (t, *J* = 6.8 Hz, 1H), 5.85 (bs, 1H), 2.09-2.05 (m, 2H), 1.54-1.47 (m, 2H), 1.37-1.32 (m, 2H), 0.96 (t, *J* = 7.6 Hz, 9H), 0.87 (t, *J* = 8.4 Hz, 3H), 0.64 (q, *J* = 8.4 Hz, 6H). <sup>13</sup>C NMR (100 MHz, CDCl<sub>3</sub>): δ 205.8, 136.4, 128.4, 125.8, 125.6, 98.3, 89.7, 31.3, 29.4, 22.6, 13.9, 7.4, 3.2. IR (neat): 2954, 2931, 2873, 1917, 1598, 1496, 1457, 1414, 1377, 1238, 1007, 973, 905, 798. HRMS (EI) *m/z*: [*M*]<sup>+</sup> Calcd for C<sub>19</sub>H<sub>30</sub>Si 286.2111; Found 286.2115.

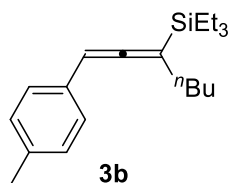

**Triethyl(1-(*p*-tolyl)hepta-1,2-dien-3-yl)silane (3b).** CuCl (0.03 mmol, 3.0 mg), PCy<sub>3</sub> (0.03 mmol, 8.4 mg), NaHCO<sub>3</sub> (0.6 mmol, 50.4 mg), Et<sub>3</sub>Si-Bpin (0.6 mmol, 145.3 mg) and 1,4-dioxane (1.5 mL), **1b** (0.3 mmol, 78.1 mg) were stirred at 80 °C for 24 h. Purification by silica gel column (eluent: petroleum ether) afforded the title product **3b** in 73% yield (66.0 mg) as a light-yellow oil. <sup>1</sup>H NMR (400 MHz, CDCl<sub>3</sub>): δ 7.12 (d, *J* = 8.0 Hz, 2H), 7.07 (d, *J* = 8.0 Hz,

2H), 5.83 (t,  $J = 2.8$  Hz, 1H), 2.30 (s, 3H), 2.06-2.04 (m, 2H), 1.52-1.48 (m, 2H), 1.37-1.34 (m, 2H), 0.96 (t,  $J = 8.0$  Hz, 9H), 0.87 (t,  $J = 7.2$  Hz, 3H), 0.64 (q,  $J = 6.4$  Hz, 6H).  $^{13}\text{C}$  NMR (100 MHz,  $\text{CDCl}_3$ ):  $\delta$  205.9, 135.2, 133.3, 129.2, 125.7, 98.2, 89.5, 31.3, 29.5, 22.6, 21.1, 13.9, 7.4, 3.3. IR (neat): 2953, 2930, 2873, 1917, 1512, 1457, 1415, 1377, 1237, 1107, 1008, 973, 826. HRMS (EI)  $m/z$ :  $[\text{M}]^+$  Calcd for  $\text{C}_{20}\text{H}_{32}\text{Si}$  300.2268; Found 300.2274.

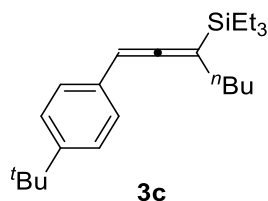

**(1-(4-(*tert*-Butyl)phenyl)hepta-1,2-dien-3-yl)triethylsilane (3c).** CuCl (0.03 mmol, 3.0 mg),  $\text{PCy}_3$  (0.03 mmol, 8.4 mg),  $\text{NaHCO}_3$  (0.6 mmol, 50.4 mg),  $\text{Et}_3\text{Si-Bpin}$  (0.6 mmol, 145.3 mg) and 1,4-dioxane (1.5 mL), **1c** (0.3 mmol, 90.7 mg) were stirred at 80 °C for 24 h. Purification by silica gel plate (eluent: petroleum ether) afforded the title product **3c** in 86% yield (88.4 mg) as a colorless oil.  $^1\text{H}$  NMR (400 MHz,  $\text{CDCl}_3$ ):  $\delta$  7.29 (d,  $J = 8.4$  Hz, 2H), 7.17 (d,  $J = 8.4$  Hz, 2H), 5.84 (t,  $J = 2.4$  Hz, 1H), 2.05-2.01 (m, 2H), 1.50-1.46 (m, 2H), 1.37-1.33 (m, 2H), 1.30 (s, 9H), 0.97 (t,  $J = 8.0$  Hz, 9H), 0.87 (t,  $J = 7.6$  Hz, 3H), 0.65 (q,  $J = 6.4$  Hz, 6H).  $^{13}\text{C}$  NMR (100 MHz,  $\text{CDCl}_3$ ):  $\delta$  206.0, 148.5, 133.3, 125.5, 125.4, 98.1, 89.4, 34.4, 31.4, 29.5, 22.7, 14.0, 7.4, 3.2. IR (neat): 2954, 2932, 2873, 1917, 1514, 1459, 1420, 1377, 1362, 1269, 1237, 1008, 973, 839, 715. HRMS (EI)  $m/z$ :  $[\text{M}]^+$  Calcd for  $\text{C}_{23}\text{H}_{38}\text{Si}$  342.2737; Found 342.2749.

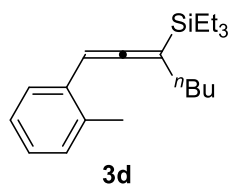

**Triethyl(1-(*o*-tolyl)hepta-1,2-dien-3-yl)silane (3d).** CuCl (0.03 mmol, 3.0 mg),  $\text{PCy}_3$  (0.03 mmol, 8.4 mg),  $\text{NaHCO}_3$  (0.6 mmol, 50.4 mg),  $\text{Et}_3\text{Si-Bpin}$  (0.6 mmol, 145.3 mg) and 1,4-dioxane (1.5 mL), **1d** (0.3 mmol, 78.1mg) were stirred at 80 °C for 24 h. Purification by silica gel column (eluent: petroleum ether) afforded the title product **3d** in 77% yield (69.3 mg) as a yellow oil.  $^1\text{H}$  NMR (400 MHz,  $\text{CDCl}_3$ ):  $\delta$  7.35 (d,  $J = 7.6$  Hz, 1H), 7.11 (t,  $J = 8.0$  Hz, 2H),

7.02 (t,  $J = 6.8$  Hz, 1H), 6.02 (t,  $J = 2.8$  Hz, 1H), 2.32 (s, 3H), 2.07-2.06 (m, 2H), 1.52-1.47 (m, 2H), 1.38-1.33 (m, 2H), 0.96 (t,  $J = 7.6$  Hz, 9H), 0.88 (t,  $J = 7.2$  Hz, 3H), 0.65 (q,  $J = 6.4$  Hz, 6H).  $^{13}\text{C}$  NMR (100 MHz,  $\text{CDCl}_3$ ):  $\delta$  206.4, 134.4, 133.8, 130.3, 126.1, 125.9, 125.4, 97.1, 86.6, 31.4, 29.4, 22.7, 19.8, 13.9, 7.4, 3.2. IR (neat): 2954, 2931, 2874, 1915, 1600, 1489, 1463, 1414, 1377, 1237, 1006, 973, 795. HRMS (EI)  $m/z$ :  $[\text{M}]^+$  Calcd for  $\text{C}_{20}\text{H}_{32}\text{Si}$  300.2268; Found 300.2271.

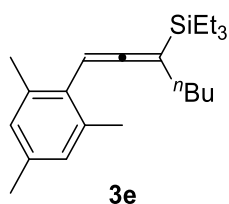

**Triethyl(1-mesitylhepta-1,2-dien-3-yl)silane (3e).** CuCl (0.03 mmol, 3.0 mg),  $\text{PCy}_3$  (0.03 mmol, 8.4 mg),  $\text{NaHCO}_3$  (0.6 mmol, 50.4 mg),  $\text{Et}_3\text{Si-Bpin}$  (0.6 mmol, 145.3 mg) and 1,4-dioxane (1.5 mL), **1e** (0.3 mmol, 86.5 mg) were stirred at 80 °C for 24 h. Purification by silica gel plate (eluent: petroleum ether) afforded the title product **3e** in 45% yield (44.0 mg) as a colorless oil.  $^1\text{H}$  NMR (400 MHz,  $\text{CDCl}_3$ ):  $\delta$  6.82 (s, 2H), 5.99 (s, 1H), 2.32 (s, 6H), 2.25 (s, 3H), 2.14-2.08 (m, 1H), 2.00-1.93 (m, 1H), 1.56-1.53 (m, 2H), 1.40-1.34 (m, 2H), 0.94-0.90 (m, 12H), 0.65-0.58 (m, 6H).  $^{13}\text{C}$  NMR (100 MHz,  $\text{CDCl}_3$ ):  $\delta$  207.7, 135.7, 134.8, 129.6, 129.0, 93.4, 84.7, 31.5, 29.5, 22.7, 21.7, 20.8, 14.0, 7.4, 3.3. IR (neat): 2953, 2931, 2873, 1919, 1480, 1458, 1414, 1376, 1237, 1010, 974, 851, 803, 718  $\text{cm}^{-1}$ . HRMS (EI)  $m/z$ :  $[\text{M}]^+$  Calcd for  $\text{C}_{22}\text{H}_{36}\text{Si}$  328.2581; Found 328.2587.

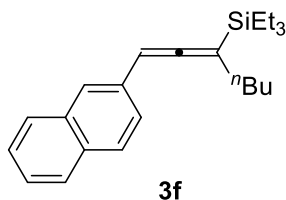

**Triethyl(1-(naphthalen-2-yl)hepta-1,2-dien-3-yl)silane (3f).** CuCl (0.03 mmol, 3.0 mg),  $\text{PCy}_3$  (0.03 mmol, 8.4 mg),  $\text{NaHCO}_3$  (0.6 mmol, 50.4 mg),  $\text{Et}_3\text{Si-Bpin}$  (0.6 mmol, 145.3 mg) and 1,4-dioxane (1.5 mL), **1f** (0.3 mmol, 88.9 mg) were stirred at 80 °C for 24 h. Purification

by silica gel plate (eluent: petroleum ether) afforded the title product **3f** in 76% yield (76.5 mg) as a light-yellow oil.  $^1\text{H}$  NMR (400 MHz,  $\text{CDCl}_3$ ):  $\delta$  7.73 (t,  $J = 8.8$  Hz, 3H), 7.57 (s, 1H), 7.45-7.35 (m, 3H), 6.04 (s, 1H), 2.11-2.09 (m, 2H), 1.56-1.51 (m, 2H), 1.38-1.34 (m, 2H), 0.98 (t,  $J = 8.0$  Hz, 9H), 0.88 (t,  $J = 7.6$  Hz, 3H), 0.67 (q,  $J = 6.0$  Hz, 6H).  $^{13}\text{C}$  NMR (100 MHz,  $\text{CDCl}_3$ ):  $\delta$  206.3, 133.95, 133.88, 132.1, 128.0, 127.6, 127.4, 126.0, 124.9, 124.4, 123.8, 98.5, 90.1, 31.3, 29.4, 22.6, 14.0, 7.4, 3.2. IR (neat): 2953, 2930, 2873, 1916, 1628, 1598, 1508, 1457, 1317, 1237, 1006, 886, 855, 817, 716  $\text{cm}^{-1}$ . HRMS (EI)  $m/z$ :  $[\text{M}]^+$  Calcd for  $\text{C}_{23}\text{H}_{32}\text{Si}$  336.2268; Found 336.2272.

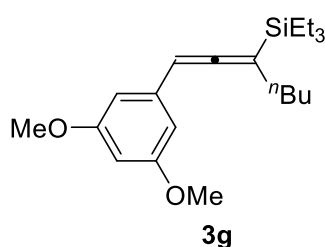

**(1-(3,5-Dimethoxyphenyl)hepta-1,2-dien-3-yl)triethylsilane (3g).**  $\text{CuCl}$  (0.03 mmol, 3.0 mg),  $\text{PCy}_3$  (0.03 mmol, 8.4 mg),  $\text{NaHCO}_3$  (0.6 mmol, 50.4 mg),  $\text{Et}_3\text{Si-Bpin}$  (0.6 mmol, 145.3 mg) and 1,4-dioxane (1.5 mL), **1g** (0.3 mmol, 91.9 mg) were stirred at 80  $^\circ\text{C}$  for 24 h. Purification by silica gel plate (eluent: petroleum ether) afforded the title product **3g** in 93% yield (97.1 mg) as a colorless oil.  $^1\text{H}$  NMR (400 MHz,  $\text{CDCl}_3$ ):  $\delta$  6.42 (d,  $J = 2.0$  Hz, 2H), 6.26 (t,  $J = 2.4$  Hz, 1H), 5.80 (t,  $J = 2.8$  Hz, 1H), 3.76 (s, 6H), 2.08-2.04 (m, 2H), 1.54-1.48 (m, 2H), 1.40-1.33 (m, 2H), 0.97 (t,  $J = 8.0$  Hz, 9H), 0.88 (t,  $J = 7.2$  Hz, 3H), 0.64 (q,  $J = 8.0$  Hz, 6H).  $^{13}\text{C}$  NMR (100 MHz,  $\text{CDCl}_3$ ):  $\delta$  205.8, 160.8, 138.6, 103.7, 98.41, 98.35, 89.9, 55.1, 31.3, 29.4, 22.6, 13.9, 7.4, 3.2. IR (neat): 2953, 2873, 1917, 1591, 1460, 1428, 1377, 1306, 1290, 1204, 1139, 1066, 1009, 972, 928, 848, 830, 715, 682  $\text{cm}^{-1}$ . HRMS (EI)  $m/z$ :  $[\text{M}]^+$  Calcd for  $\text{C}_{21}\text{H}_{34}\text{O}_2\text{Si}$  346.2323; Found 346.2332.

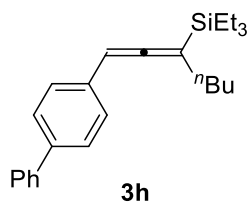

**(1-([1,1'-Biphenyl]-4-yl)hepta-1,2-dien-3-yl)triethylsilane (3h).** CuCl (0.03 mmol, 3.0 mg), PCy<sub>3</sub> (0.03 mmol, 8.4 mg), NaHCO<sub>3</sub> (0.6 mmol, 50.4 mg), Et<sub>3</sub>Si-Bpin (0.6 mmol, 145.3 mg) and 1,4-dioxane (1.5 mL), **1h** (0.3 mmol, 96.7 mg) were stirred at 80 °C for 24 h. Purification by silica gel column (eluent: petroleum ether) afforded the title product **3h** in 76% yield (82.9 mg) as a colorless oil. <sup>1</sup>H NMR (400 MHz, CDCl<sub>3</sub>): δ 7.58 (d, *J* = 8.0 Hz, 2H), 7.51 (d, *J* = 8.0 Hz, 2H), 7.40 (t, *J* = 7.2 Hz, 2H), 7.30 (d, *J* = 8.4 Hz, 3H), 5.90 (s, 1H), 2.09 (m, 2H), 1.54-1.50 (m, 2H), 1.39-1.32 (m, 2H), 0.98 (t, *J* = 8.0 Hz, 9H), 0.89 (t, *J* = 7.6 Hz, 3H), 0.66 (q, *J* = 7.6 Hz, 6H). <sup>13</sup>C NMR (100 MHz, CDCl<sub>3</sub>): δ 206.0, 141.0, 138.5, 135.5, 128.7, 127.2, 126.9, 126.8, 126.2, 98.4, 89.4, 31.4, 29.4, 22.6, 13.9, 7.4, 3.3. IR (neat): 3028, 2953, 2930, 2872, 1915, 1600, 1486, 1457, 1417, 1237, 1007, 844, 781, 758, 695 cm<sup>-1</sup>. HRMS (EI) *m/z*: [M]<sup>+</sup> Calcd for C<sub>25</sub>H<sub>34</sub>Si 362.2424; Found 362.2437.

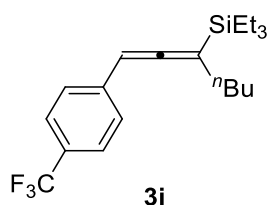

**Triethyl(1-(4-(trifluoromethyl)phenyl)hepta-1,2-dien-3-yl)silane (3i).** CuCl (0.03 mmol, 3.0 mg), PCy<sub>3</sub> (0.03 mmol, 8.4 mg), NaHCO<sub>3</sub> (0.6 mmol, 50.4 mg), Et<sub>3</sub>Si-Bpin (0.6 mmol, 145.3 mg) and 1,4-dioxane (1.5 mL), **1i** (0.3 mmol, 94.3 mg) were stirred at 80 °C for 24 h. Purification by silica gel plate (eluent: petroleum ether) afforded the title product **3i** in 90% yield (95.6 mg) as a yellow oil. <sup>1</sup>H NMR (400 MHz, CDCl<sub>3</sub>): δ 7.50 (d, *J* = 8.0 Hz, 2H), 7.30 (d, *J* = 8.4 Hz, 2H), 5.88 (s, 1H), 2.09 (m, 2H), 1.51-1.47 (m, 2H), 1.37-1.35 (m, 2H), 0.97 (t, *J* = 8.0 Hz, 9H), 0.88 (t, *J* = 7.2 Hz, 3H), 0.66 (q, *J* = 8.0 Hz, 6H). <sup>13</sup>C NMR (100 MHz, CDCl<sub>3</sub>): δ 205.8, 140.6, 127.5 (q, <sup>2</sup>*J*<sub>C-F</sub> = 31.9 Hz), 125.8, 125.4 (q, <sup>4</sup>*J*<sub>C-F</sub> = 3.7 Hz), 124.4 (d, <sup>1</sup>*J*<sub>C-F</sub> = 269.9 Hz), 99.0, 89.0, 31.3, 29.2, 22.6, 13.9, 7.3, 3.2. <sup>19</sup>F NMR (376 MHz, CDCl<sub>3</sub>) δ -62.3. IR (neat): 2956, 2875, 1916, 1615, 1458, 1426, 1322, 1237, 1162, 1106, 1066, 1016, 973, 847, 716 cm<sup>-1</sup>. HRMS (EI) *m/z*: [M]<sup>+</sup> Calcd for C<sub>20</sub>H<sub>29</sub>F<sub>3</sub>Si 354.1985; Found 354.1980.

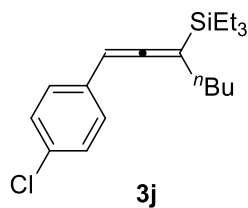

**(1-(4-Chlorophenyl)hepta-1,2-dien-3-yl)triethylsilane (3j).** CuCl (0.03 mmol, 3.0 mg), PCy<sub>3</sub> (0.03 mmol, 8.4 mg), NaHCO<sub>3</sub> (0.6 mmol, 50.4 mg), Et<sub>3</sub>Si-Bpin (0.6 mmol, 145.3 mg) and 1,4-dioxane (1.5 mL), **1j** (0.3 mmol, 84.2 mg) were stirred at 80 °C for 24 h. Purification by silica gel plate (eluent: petroleum ether) afforded the title product **3j** in 82% yield (78.9 mg) as a colorless oil. <sup>1</sup>H NMR (400 MHz, CDCl<sub>3</sub>): δ 7.21 (d, *J* = 8.8 Hz, 2H), 7.14 (d, *J* = 8.0 Hz, 2H), 5.81 (t, *J* = 2.8 Hz, 1H), 2.09-2.04 (m, 2H), 1.51-1.47 (m, 2H), 1.35-1.34 (m, 2H), 0.95 (t, *J* = 8.0 Hz, 9H), 0.88 (t, *J* = 7.6 Hz, 3H), 0.64 (q, *J* = 7.6 Hz, 6H). <sup>13</sup>C NMR (100 MHz, CDCl<sub>3</sub>): δ 205.7, 135.0, 131.0, 128.6, 126.9, 98.8, 88.9, 31.3, 29.3, 22.6, 13.9, 7.4, 3.2. IR (neat): 2954, 2931, 2873, 1916, 1490, 1457, 1418, 1237, 1194, 1090, 1011, 974, 835, 716 cm<sup>-1</sup>. HRMS (EI) *m/z*: [M]<sup>+</sup> Calcd for C<sub>19</sub>H<sub>29</sub>ClSi 320.1722; Found 320.1730.

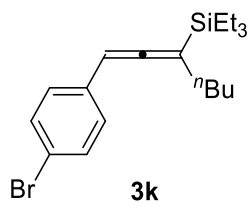

**(1-(4-Bromophenyl)hepta-1,2-dien-3-yl)triethylsilane (3k).** CuCl (0.03 mmol, 3.0 mg), PCy<sub>3</sub> (0.03 mmol, 8.4 mg), NaHCO<sub>3</sub> (0.6 mmol, 50.4 mg), Et<sub>3</sub>Si-Bpin (0.6 mmol, 145.3 mg) and 1,4-dioxane (1.5 mL), **1k** (0.3 mmol, 97.6 mg) were stirred at 80 °C for 24 h. Purification by silica gel column (eluent: petroleum ether) afforded the title product **3k** in 80% yield (88.2 mg) as a yellow oil. <sup>1</sup>H NMR (400 MHz, CDCl<sub>3</sub>): δ 7.36 (d, *J* = 8.0 Hz, 2H), 7.08 (d, *J* = 8.0 Hz, 2H), 5.80 (bs, 1H), 2.08-2.03 (m, 2H), 1.51-1.45 (m, 2H), 1.35-1.33 (m, 2H), 0.95 (t, *J* = 8.0 Hz, 9H), 0.87 (t, *J* = 7.2 Hz, 3H), 0.64 (q, *J* = 6.8 Hz, 6H). <sup>13</sup>C NMR (100 MHz, CDCl<sub>3</sub>): δ 205.6, 135.5, 131.5, 127.3, 118.9, 98.9, 88.9, 31.3, 29.3, 22.6, 13.9, 7.4, 3.2. IR (neat): 2954, 2932, 2873, 1916, 1741, 1488, 1457, 1417, 1238, 1070, 1047, 1008, 974, 833 cm<sup>-1</sup>. HRMS (EI) *m/z*: [M]<sup>+</sup> Calcd for C<sub>19</sub>H<sub>29</sub>BrSi 364.1216; Found 364.1222.

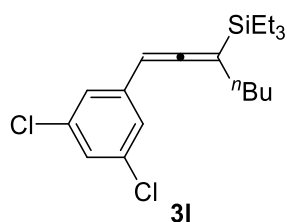

**(1-(3,5-Dichlorophenyl)hepta-1,2-dien-3-yl)triethylsilane (31).** CuCl (0.03 mmol, 3.0 mg), PCy<sub>3</sub> (0.03 mmol, 8.4 mg), NaHCO<sub>3</sub> (0.6 mmol, 50.4 mg), Et<sub>3</sub>Si-Bpin (0.6 mmol, 145.3 mg) and 1,4-dioxane (1.5 mL), **11** (0.3 mmol, 94.6 mg) were stirred at 80 °C for 24 h. Purification by silica gel plate (eluent: petroleum ether) afforded the title product **31** in 85% yield (90.6 mg) as a yellow oil. <sup>1</sup>H NMR (400 MHz, CDCl<sub>3</sub>): δ 7.07 (s, 3H), 5.74 (s, 1H), 2.08-2.04 (m, 2H), 1.49-1.33 (m, 4H), 0.96 (t, *J* = 8.0 Hz, 9H), 0.89 (t, *J* = 7.2 Hz, 3H), 0.65 (q, *J* = 7.6 Hz, 6H). <sup>13</sup>C NMR (100 MHz, CDCl<sub>3</sub>): δ 205.3, 140.2, 134.9, 125.3, 123.9, 99.6, 88.2, 31.2, 29.2, 22.6, 13.9, 7.3, 3.1. IR (neat): 2954, 2874, 1916, 1583, 1561, 1427, 1377, 1238, 1112, 1006, 909, 871, 847, 800, 671 cm<sup>-1</sup>. HRMS (EI) *m/z*: [M]<sup>+</sup> Calcd for C<sub>19</sub>H<sub>28</sub>Cl<sub>2</sub>Si 354.1332; Found 354.1335.

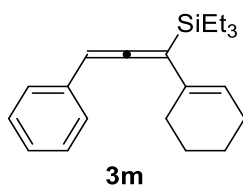

**(1-(Cyclohex-1-en-1-yl)-3-phenylpropa-1,2-dien-1-yl)triethylsilane (3m).** CuCl (0.03 mmol, 3.0 mg), PCy<sub>3</sub> (0.03 mmol, 8.4 mg), NaHCO<sub>3</sub> (0.6 mmol, 50.4 mg), Et<sub>3</sub>Si-Bpin (0.6 mmol, 145.3 mg) and 1,4-dioxane (1.5 mL), **1m** (0.3 mmol, 81.1 mg) were stirred at 80 °C for 24 h. Purification by silica gel plate (eluent: petroleum ether) afforded the title product **3m** in 65% yield (61.0 mg) as a yellow oil. <sup>1</sup>H NMR (400 MHz, CDCl<sub>3</sub>): δ 7.29-7.22 (m, 4H), 7.12 (t, *J* = 6.8 Hz, 1H), 6.03 (s, 1H), 5.74 (bs, 1H), 2.17-2.11 (m, 4H), 1.63-1.58 (m, 4H), 0.95 (t, *J* = 8.0 Hz, 9H), 0.74-0.66 (m, 6H). <sup>13</sup>C NMR (100 MHz, CDCl<sub>3</sub>): δ 208.9, 135.8, 133.4, 128.5, 125.93, 125.87, 125.3, 103.3, 91.0, 28.4, 26.1, 23.0, 22.2, 7.5, 4.1. IR (neat): 2932, 2873, 1900, 1598, 1495, 1455, 1376, 1238, 1116, 1003, 976, 875, 797, 729, 692 cm<sup>-1</sup>. HRMS (EI) *m/z*: [M]<sup>+</sup> Calcd for C<sub>21</sub>H<sub>30</sub>Si 310.2111; Found 310.2109.

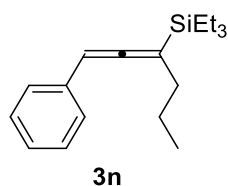

**Triethyl(1-phenylhexa-1,2-dien-3-yl)silane (3n).** CuCl (0.03 mmol, 3.0 mg), PCy<sub>3</sub> (0.03 mmol, 8.4 mg), NaHCO<sub>3</sub> (0.6 mmol, 50.4 mg), Et<sub>3</sub>Si-Bpin (0.6 mmol, 145.3 mg) and 1,4-dioxane (1.5 mL), **1n** (0.3 mmol, 69.7 mg) were stirred at 80 °C for 24 h. Purification by silica gel plate (eluent: petroleum ether) afforded the title product **3n** in 92% yield (75.0 mg) as a colorless oil. <sup>1</sup>H NMR (400 MHz, CDCl<sub>3</sub>): δ 7.27-7.22 (m, 4H), 7.12-7.09 (m, 1H), 5.86 (t, *J* = 2.4 Hz, 1H), 2.07-2.02 (m, 2H), 1.57-1.50 (m, 2H), 0.98-0.91 (m, 12H), 0.64 (q, *J* = 8.4 Hz, 6H). <sup>13</sup>C NMR (100 MHz, CDCl<sub>3</sub>): δ 205.9, 136.3, 128.5, 125.8, 125.6, 98.1, 89.7, 31.9, 22.4, 14.1, 7.4, 3.2. IR (neat): 2953, 2873, 1917, 1598, 1496, 1456, 1413, 1237, 1072, 1001, 905, 796, 715, 691 cm<sup>-1</sup>. HRMS (EI) *m/z*: [M]<sup>+</sup> Calcd for C<sub>18</sub>H<sub>28</sub>Si 272.1955; Found 272.1958.

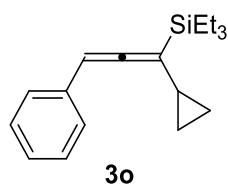

**(1-Cyclopropyl-3-phenylpropa-1,2-dien-1-yl)triethylsilane (3o).** CuCl (0.03 mmol, 3.0 mg), PCy<sub>3</sub> (0.03 mmol, 8.4 mg), NaHCO<sub>3</sub> (0.6 mmol, 50.4 mg), Et<sub>3</sub>Si-Bpin (0.6 mmol, 145.3 mg) and 1,4-dioxane (1.5 mL), **1o** (0.3 mmol, 69.1 mg) were stirred at 80 °C for 24 h. Purification by silica gel plate (eluent: petroleum ether) afforded the title product **3o** in 86% yield (69.5 mg) as a colorless oil. <sup>1</sup>H NMR (400 MHz, CDCl<sub>3</sub>): δ 7.26-7.23 (m, 2H), 7.19-7.17 (m, 2H), 7.12-7.09 (m, 1H), 5.91 (s, 1H), 1.15 (bs, 1H), 0.99 (t, *J* = 7.2 Hz, 9H), 0.71-0.69 (m, 8H), 0.49 (bs, 2H). <sup>13</sup>C NMR (100 MHz, CDCl<sub>3</sub>): δ 204.0, 136.0, 128.5, 125.9, 125.8, 102.7, 91.5, 9.8, 8.6, 8.0, 7.4, 3.4. IR (neat): 2952, 2909, 2874, 1917, 1596, 1495, 1456, 1414, 1237, 1000, 847, 800, 733, 717, 691 cm<sup>-1</sup>. HRMS (EI) *m/z*: [M]<sup>+</sup> Calcd for C<sub>18</sub>H<sub>26</sub>Si 270.1798; Found 270.1798.



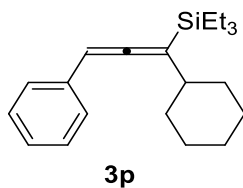

**(1-Cyclohexyl-3-phenylpropa-1,2-dien-1-yl)triethylsilane (3p).** CuCl (0.03 mmol, 3.0 mg), PCy<sub>3</sub> (0.03 mmol, 8.4 mg), NaHCO<sub>3</sub> (0.6 mmol, 50.4 mg), Et<sub>3</sub>Si-Bpin (0.6 mmol, 145.3 mg) and 1,4-dioxane (1.5 mL), **1p** (0.3 mmol, 81.7 mg) were stirred at 80 °C for 24 h. Purification by silica gel plate (eluent: petroleum ether) afforded the title product **3p** in 79% yield (74.1 mg) as a colorless oil. <sup>1</sup>H NMR (400 MHz, CDCl<sub>3</sub>): δ 7.25-7.22 (m, 4H), 7.12-7.10 (m, 1H), 5.88 (s, 1H), 1.90 (m, 2H), 1.82 (d, *J* = 11.2 Hz, 1H), 1.71 (m, 2H), 1.62 (d, *J* = 12.0 Hz, 1H), 1.28-1.15 (m, 5H), 0.96 (t, *J* = 7.6 Hz, 9H), 0.65 (q, *J* = 6.4 Hz, 6H). <sup>13</sup>C NMR (100 MHz, CDCl<sub>3</sub>): δ 206.1, 136.3, 128.5, 125.64, 125.59, 104.2, 90.5, 39.6, 34.7, 34.1, 26.82, 26.78, 26.0, 7.5, 3.5. IR (neat): 2923, 2873, 1911, 1598, 1495, 1456, 1448, 1237, 1005, 978, 905, 796, 731, 715, 691 cm<sup>-1</sup>. HRMS (EI) *m/z*: [M]<sup>+</sup> Calcd for C<sub>21</sub>H<sub>32</sub>Si 312.2268; Found 312.2274.

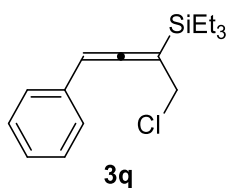

**(1-Chloro-4-phenylbuta-2,3-dien-2-yl)triethylsilane (3q).** CuCl (0.03 mmol, 3.0 mg), PCy<sub>3</sub> (0.03 mmol, 8.4 mg), NaHCO<sub>3</sub> (0.6 mmol, 50.4 mg), Et<sub>3</sub>Si-Bpin (0.6 mmol, 145.3 mg) and 1,4-dioxane (1.5 mL), **1q** (0.3 mmol, 71.6 mg) were stirred at 80 °C for 24 h. Purification by silica gel plate (eluent: petroleum ether) afforded trace product **3q**.

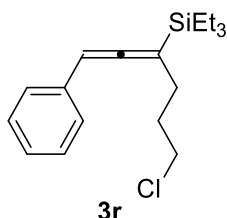

**(6-Chloro-1-phenylhexa-1,2-dien-3-yl)triethylsilane (3r).** CuCl (0.03 mmol, 3.0 mg), PCy<sub>3</sub> (0.03 mmol, 8.4 mg), NaHCO<sub>3</sub> (0.6 mmol, 50.4 mg), Et<sub>3</sub>Si-Bpin (0.6 mmol, 145.3 mg) and 1,4-dioxane (1.5 mL), **1r** (0.3 mmol, 80.0 mg) were stirred at 80 °C for 24 h. Purification by silica

gel plate (eluent: petroleum ether) afforded the title product **3r** in 78% yield (71.8 mg) as a yellow oil.  $^1\text{H}$  NMR (400 MHz,  $\text{CDCl}_3$ ):  $\delta$  7.27 (t,  $J = 7.6$  Hz, 2H), 7.21 (d,  $J = 7.2$  Hz, 2H), 7.13 (t,  $J = 6.8$  Hz, 1H), 5.90 (s, 1H), 3.57 (t,  $J = 6.0$  Hz, 2H), 2.24-2.21 (m, 2H), 2.02-1.98 (m, 2H), 0.97 (t,  $J = 8.0$  Hz, 9H), 0.66 (q,  $J = 8.0$  Hz, 6H).  $^{13}\text{C}$  NMR (100 MHz,  $\text{CDCl}_3$ ):  $\delta$  205.5, 135.7, 128.6, 125.9, 125.8, 97.2, 90.5, 44.7, 31.6, 26.5, 7.4, 3.1. IR (neat): 2953, 2874, 1917, 1597, 1496, 1456, 1414, 1237, 1002, 973, 907, 800, 766, 733, 716, 692  $\text{cm}^{-1}$ . HRMS (EI)  $m/z$ :  $[\text{M}]^+$  Calcd for  $\text{C}_{18}\text{H}_{27}\text{ClSi}$  306.1565; Found 306.1567.

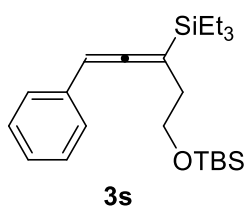

**tert-Butyldimethyl((5-phenyl-3-(triethylsilyl)penta-3,4-dien-1-yl)oxy)silane (3s).**  $\text{CuCl}$  (0.03 mmol, 3.0 mg),  $\text{PCy}_3$  (0.03 mmol, 8.4 mg),  $\text{NaHCO}_3$  (0.6 mmol, 50.4 mg),  $\text{Et}_3\text{Si-Bpin}$  (0.6 mmol, 145.3 mg) and 1,4-dioxane (1.5 mL), **1s** (0.3 mmol, 104.6 mg) were stirred at 80  $^\circ\text{C}$  for 24 h. Purification by silica gel plate (eluent: petroleum ether) afforded the title product **3s** in 84% yield (98.0 mg) as a yellow oil.  $^1\text{H}$  NMR (400 MHz,  $\text{CDCl}_3$ ):  $\delta$  7.40-7.33 (m, 4H), 7.24 (t,  $J = 6.8$  Hz, 1H), 5.97 (t,  $J = 2.4$  Hz, 1H), 3.88 (t,  $J = 7.6$  Hz, 2H), 2.46-2.38 (m, 2H), 1.09 (t,  $J = 8.0$  Hz, 9H), 1.01 (s, 9H), 0.77 (q,  $J = 8.4$  Hz, 6H), 0.16 (d,  $J = 4.8$  Hz, 6H).  $^{13}\text{C}$  NMR (100 MHz,  $\text{CDCl}_3$ ):  $\delta$  206.0, 136.0, 128.5, 125.9, 125.7, 94.5, 89.6, 62.8, 32.7, 25.9, 18.3, 7.4, 3.1, -5.28, -5.29. IR (neat): 2952, 2929, 2874, 1917, 1599, 1496, 1457, 1254, 1095, 1004, 975, 834, 798, 774, 734, 715, 692  $\text{cm}^{-1}$ . HRMS (EI)  $m/z$ :  $[\text{M}]^+$  Calcd for  $\text{C}_{23}\text{H}_{40}\text{OSi}_2$  388.2612; Found 388.2604.

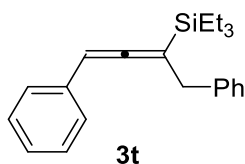

**(1,4-Diphenylbuta-2,3-dien-2-yl)triethylsilane (3t).**  $\text{CuCl}$  (0.03 mmol, 3.0 mg),  $\text{PCy}_3$  (0.03 mmol, 8.4 mg),  $\text{NaHCO}_3$  (0.6 mmol, 50.4 mg),  $\text{Et}_3\text{Si-Bpin}$  (0.6 mmol, 145.3 mg) and 1,4-

dioxane (1.5 mL), **1t** (0.3 mmol, 84.1 mg) were stirred at 80 °C for 24 h. Purification by silica gel plate (eluent: petroleum ether) afforded the title product **3t** in 80% yield (77.3 mg) as a colorless oil. <sup>1</sup>H NMR (400 MHz, CDCl<sub>3</sub>): δ 7.24-7.22 (m, 6H), 7.18-7.16 (m, 3H), 7.12-7.10 (m, 1H), 5.84 (m, 1H), 3.48-3.38 (m, 2H), 0.91 (t, *J* = 10.0 Hz, 9H), 0.60 (q, *J* = 5.6 Hz, 6H). <sup>13</sup>C NMR (100 MHz, CDCl<sub>3</sub>): δ 207.8, 140.2, 135.7, 128.9, 128.4, 128.1, 126.1, 125.9, 125.8, 98.1, 89.7, 36.9, 7.3, 3.3. IR (neat): 2952, 2908, 2873, 1917, 1598, 1495, 1454, 1413, 1237, 1072, 1004, 793, 735, 715, 691 cm<sup>-1</sup>. HRMS (EI) *m/z*: [M]<sup>+</sup> Calcd for C<sub>22</sub>H<sub>28</sub>Si 320.1955; Found 320.1957.

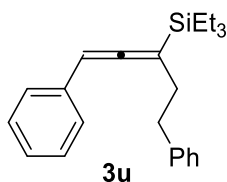

**(1,5-Diphenylpenta-1,2-dien-3-yl)triethylsilane (3u)**. CuCl (0.03 mmol, 3.0 mg), PCy<sub>3</sub> (0.03 mmol, 8.4 mg), NaHCO<sub>3</sub> (0.6 mmol, 50.4 mg), Et<sub>3</sub>Si-Bpin (0.6 mmol, 145.3 mg) and 1,4-dioxane (1.5 mL), **1u** (0.3 mmol, 88.3 mg) were stirred at 80 °C for 24 h. Purification by silica gel plate (eluent: petroleum ether) afforded the title product **3u** in 91% yield (91.0 mg) as a yellow oil. <sup>1</sup>H NMR (400 MHz, CDCl<sub>3</sub>): δ 7.25-7.10 (m, 10H), 5.91 (bs, 1H), 2.87-2.76 (m, 2H), 2.41-2.32 (m, 2H), 0.96 (t, *J* = 8.0 Hz, 9H), 0.65 (q, *J* = 9.6 Hz, 6H). <sup>13</sup>C NMR (100 MHz, CDCl<sub>3</sub>): δ 205.9, 142.2, 136.0, 128.5, 128.4, 128.3, 125.9, 125.77, 125.76, 98.0, 90.4, 35.4, 31.6, 7.4, 3.2. IR (neat): 2951, 2908, 2873, 1919, 1598, 1495, 1455, 1413, 1237, 1004, 963, 905, 799, 734, 716, 692 cm<sup>-1</sup>. HRMS (EI) *m/z*: [M]<sup>+</sup> Calcd for C<sub>23</sub>H<sub>30</sub>Si 334.2111; Found 334.2114.

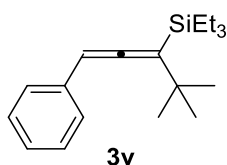

**(4,4-Dimethyl-1-phenylpenta-1,2-dien-3-yl)triethylsilane (3v)**. CuCl (0.03 mmol, 3.0 mg), PCy<sub>3</sub> (0.03 mmol, 8.4 mg), NaHCO<sub>3</sub> (0.6 mmol, 50.4 mg), Et<sub>3</sub>Si-Bpin (0.6 mmol, 145.3 mg) and 1,4-dioxane (1.5 mL), **1v** (0.3 mmol, 73.9 mg) were stirred at 80 °C for 24 h. Purification

by silica gel column (eluent: petroleum ether) afforded the title product **3v** in 41% yield (35.0 mg) as a colorless oil.  $^1\text{H}$  NMR (400 MHz,  $\text{CDCl}_3$ ):  $\delta$  7.28-7.22 (m, 4H), 7.13-7.09 (m, 1H), 5.87 (s, 1H), 1.18 (s, 9H), 0.95 (t,  $J = 8.0$  Hz, 9H), 0.72-0.67 (m, 6H).  $^{13}\text{C}$  NMR (100 MHz,  $\text{CDCl}_3$ ):  $\delta$  206.1, 136.3, 128.5, 125.7, 125.6, 108.5, 90.4, 36.0, 31.5, 7.5, 4.8. IR (neat): 2955, 2874, 1918, 1600, 1495, 1455, 1361, 1225, 1002, 905, 798, 731, 716, 692  $\text{cm}^{-1}$ . HRMS (EI)  $m/z$ :  $[\text{M}]^+$  Calcd for  $\text{C}_{19}\text{H}_{30}\text{Si}$  286.2111; Found 286.2116.

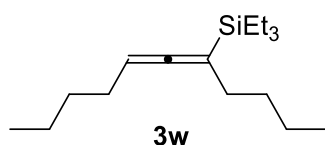

**Triethyl(undeca-5,6-dien-5-yl)silane (3w).**  $\text{CuCl}$  (0.03 mmol, 3.0 mg),  $\text{PCy}_3$  (0.03 mmol, 8.4 mg),  $\text{NaHCO}_3$  (0.6 mmol, 50.4 mg),  $\text{Et}_3\text{Si-Bpin}$  (0.6 mmol, 145.3 mg) and 1,4-dioxane (1.5 mL), **1w** (0.3 mmol, 67.9 mg) were stirred at 80  $^\circ\text{C}$  for 24 h. Purification by silica gel column (eluent: petroleum ether) afforded the title product **3w** in 84% yield (67.0 mg) as a colorless oil.  $^1\text{H}$  NMR (400 MHz,  $\text{CDCl}_3$ ):  $\delta$  4.76-4.73 (m, 1H), 1.96-1.87 (m, 4H), 1.46-1.30 (m, 8H), 0.95-0.88 (m, 15H), 0.58 (q,  $J = 7.6$  Hz, 6H).  $^{13}\text{C}$  NMR (100 MHz,  $\text{CDCl}_3$ ):  $\delta$  206.2, 93.0, 85.3, 32.2, 31.3, 29.4, 28.6, 22.5, 22.3, 14.01, 13.97, 7.4, 3.2. IR (neat): 2954, 2927, 2873, 1932, 1458, 1414, 1378, 1237, 1008, 974, 714  $\text{cm}^{-1}$ . HRMS (EI)  $m/z$ :  $[\text{M}]^+$  Calcd for  $\text{C}_{17}\text{H}_{34}\text{Si}$  266.2424; Found 266.2417.

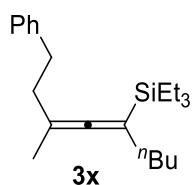

**Triethyl(3-methyl-1-phenylnona-3,4-dien-5-yl)silane (3x).**  $\text{CuCl}$  (0.03 mmol, 3.0 mg),  $\text{PCy}_3$  (0.03 mmol, 8.4 mg),  $\text{NaHCO}_3$  (0.6 mmol, 50.4 mg),  $\text{Et}_3\text{Si-Bpin}$  (0.6 mmol, 145.3 mg) and 1,4-dioxane (1.5 mL), **1x** (0.3 mmol, 86.5 mg) were stirred at 80  $^\circ\text{C}$  for 24 h. Purification by silica gel column (eluent: petroleum ether) afforded the title product **3x** in 84% yield (82.9 mg) as a colorless oil.  $^1\text{H}$  NMR (400 MHz,  $\text{CDCl}_3$ ):  $\delta$  7.26 (t,  $J = 7.6$  Hz, 2H), 7.19-7.14 (m, 3H), 2.71 (t,  $J = 8.0$  Hz, 2H), 2.21 (t,  $J = 8.4$  Hz, 2H), 1.86 (t,  $J = 6.8$  Hz, 2H), 1.68 (s, 3H), 1.36-1.30

(m, 4H), 0.94 (t,  $J = 8.0$  Hz, 9H), 0.88 (t,  $J = 7.2$  Hz, 3H), 0.57 (q,  $J = 8.0$  Hz, 6H).  $^{13}\text{C}$  NMR (100 MHz,  $\text{CDCl}_3$ ):  $\delta$  204.8, 142.6, 128.3, 128.2, 125.6, 93.4, 93.0, 35.8, 34.6, 31.4, 29.7, 22.5, 18.8, 14.1, 7.4, 3.3. IR (neat): 2952, 2873, 1936, 1496, 1454, 1375, 1237, 1008, 731, 715, 696  $\text{cm}^{-1}$ . HRMS (EI)  $m/z$ :  $[\text{M}]^+$  Calcd for  $\text{C}_{22}\text{H}_{36}\text{Si}$  328.2581; Found 328.2592.

### Synthesis of allenylsilanes 4a-4b.

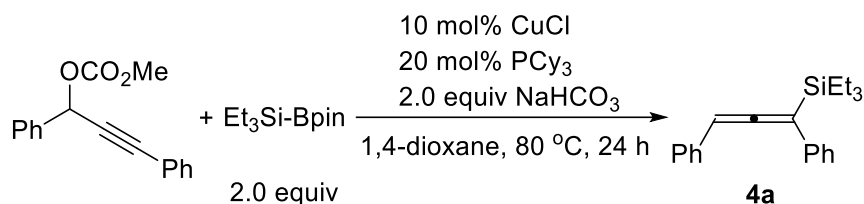

**(1,3-Diphenylpropa-1,2-dien-1-yl)triethylsilane (4a).** CuCl (0.03 mmol, 3.0 mg),  $\text{PCy}_3$  (0.06 mmol, 16.8 mg),  $\text{NaHCO}_3$  (0.6 mmol, 50.4 mg),  $\text{Et}_3\text{Si-Bpin}$  (0.6 mmol, 145.3 mg) and 1,4-dioxane (1.5 mL), **1y** (0.3 mmol, 79.9 mg) were stirred at 80 °C for 24 h. Purification by silica gel plate (eluent: petroleum ether) afforded the title product **4a** in 72% yield (65.8 mg) as a colorless oil.  $^1\text{H}$  NMR (400 MHz,  $\text{CDCl}_3$ ):  $\delta$  7.35-7.26 (m, 8H), 7.20-7.14 (m, 2H), 6.18 (s, 1H), 0.98 (t,  $J = 7.6$  Hz, 9H), 0.81-0.77 (m, 6H).  $^{13}\text{C}$  NMR (100 MHz,  $\text{CDCl}_3$ ):  $\delta$  210.2, 137.1, 134.8, 128.6, 128.5, 127.6, 126.5, 126.3, 126.2, 101.6, 90.7, 7.4, 3.9. IR (neat): 2952, 2909, 2873, 1910, 1595, 1490, 1456, 1238, 1002, 803, 760, 734, 691, 672  $\text{cm}^{-1}$ . HRMS (EI)  $m/z$ :  $[\text{M}]^+$  Calcd for  $\text{C}_{21}\text{H}_{26}\text{Si}$  306.1798; Found 306.1798.

When the reaction was carried out using CuCl (10 mol%, 0.03 mmol, 3.0 mg),  $\text{PCy}_3$  (10 mol%, 0.03 mmol, 8.4 mg),  $\text{NaHCO}_3$  (2.0 equiv, 0.6 mmol, 50.4 mg),  $\text{Et}_3\text{Si-Bpin}$  (2.0 equiv, 0.6 mmol, 145.3 mg), 1,4-dioxane (1.5 mL), and **1y** (0.3 mmol, 79.9 mg) at 80 °C for 24 h, the product **4a** was obtained in 53% yield (49.0 mg) as a colorless oil.

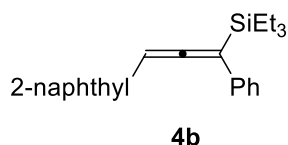

**Triethyl(3-(naphthalen-2-yl)-1-phenylpropa-1,2-dien-1-yl)silane (4b).** CuCl (0.03 mmol, 3.0 mg),  $\text{PCy}_3$  (0.06 mmol, 16.8 mg),  $\text{NaHCO}_3$  (0.6 mmol, 50.4 mg),  $\text{Et}_3\text{Si-Bpin}$  (0.6 mmol, 145.3 mg) and 1,4-dioxane (1.5 mL), **1z** (0.3 mmol, 94.4 mg) were stirred at 80 °C for 24 h. Purification by silica gel plate (eluent: petroleum ether) afforded the title product **4b** in 60%

yield (64.0 mg) as a colorless oil.  $^1\text{H}$  NMR (400 MHz,  $\text{CDCl}_3$ ):  $\delta$  7.35-7.26 (m, 8H), 7.77-7.73 (m, 3H), 7.65 (s, 1H), 7.50 (dd,  $J = 8.4, 1.6$  Hz, 1H), 7.43-7.36 (m, 4H), 7.30 (t,  $J = 7.6$  Hz, 2H), 7.20 (t,  $J = 7.2$  Hz, 1H), 6.36 (s, 1H), 0.99 (t,  $J = 7.6$  Hz, 9H), 0.83-0.76 (m, 6H).  $^{13}\text{C}$  NMR (100 MHz,  $\text{CDCl}_3$ ):  $\delta$  210.6, 137.0, 133.8, 132.4, 132.4, 128.6, 128.3, 127.7, 127.5, 126.6, 126.2, 125.3, 124.6, 124.4, 101.9, 91.1, 7.5, 4.0. IR (neat): 2952, 2873, 1908, 1628, 1595, 1508, 1490, 1377, 1238, 1111, 1002, 908, 888, 731, 694  $\text{cm}^{-1}$ . HRMS (EI)  $m/z$ :  $[\text{M}]^+$  Calcd for  $\text{C}_{25}\text{H}_{28}\text{Si}$  356.1955; Found 356.1955.

### Synthesis of allenylsilanes **4c-4f**.

#### Typical procedure for the synthesis of **4c**:

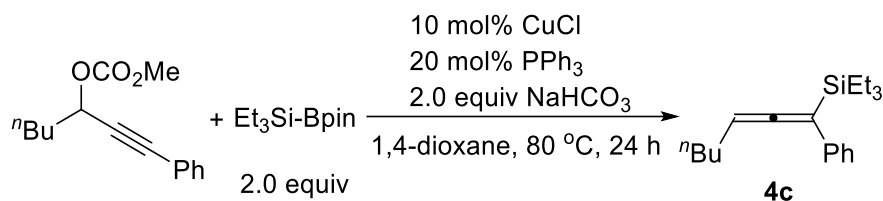

**Triethyl(1-phenylhepta-1,2-dien-1-yl)silane (4c).** CuCl (0.03 mmol, 3.0 mg), PPh<sub>3</sub> (0.06 mmol, 15.7 mg), NaHCO<sub>3</sub> (0.6 mmol, 50.4 mg), Et<sub>3</sub>Si-Bpin (0.6 mmol, 145.3 mg) and 1,4-dioxane (1.5 mL), **1za** (0.3 mmol, 73.9 mg) were stirred at 80 °C for 24 h. Purification by silica gel plate (eluent: petroleum ether) afforded the title product **4c** in 70% yield (60.1 mg) as a colorless oil.  $^1\text{H}$  NMR (400 MHz,  $\text{CDCl}_3$ ):  $\delta$  7.27 (d,  $J = 2.8$  Hz, 4H), 7.16-7.15 (m, 1H), 5.10 (t,  $J = 6.0$  Hz, 1H), 2.07 (q,  $J = 6.8$  Hz, 2H), 1.46-1.34 (m, 4H), 0.97-0.88 (m, 12H), 0.72 (q,  $J = 7.6$  Hz, 6H).  $^{13}\text{C}$  NMR (100 MHz,  $\text{CDCl}_3$ ):  $\delta$  209.3, 138.7, 128.3, 127.5, 125.8, 96.7, 86.5, 31.9, 28.2, 22.4, 13.9, 7.4, 4.0. IR (neat): 2954, 2931, 2873, 1925, 1596, 1490, 1457, 1415, 1238, 1002, 732, 718, 693  $\text{cm}^{-1}$ . HRMS (EI)  $m/z$ :  $[\text{M}-\text{C}_2\text{H}_5]^+$  Calcd for  $\text{C}_{17}\text{H}_{25}\text{Si}$  257.1720; Found 257.1715.

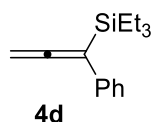

**Triethyl(1-phenylpropa-1,2-dien-1-yl)silane (4d).** CuCl (0.03 mmol, 3.0 mg), PPh<sub>3</sub> (0.06 mmol, 15.7 mg), NaHCO<sub>3</sub> (0.6 mmol, 50.4 mg), Et<sub>3</sub>Si-Bpin (0.6 mmol, 145.3 mg) and 1,4-dioxane (1.5 mL), **1zb** (0.3 mmol, 57.1 mg) were stirred at 80 °C for 24 h. Purification by silica

gel plate (eluent: petroleum ether) afforded the title product **4d** in 71% yield (49.0 mg) as a colorless oil. <sup>1</sup>H NMR (400 MHz, CDCl<sub>3</sub>): δ 7.28 (d, *J* = 4.8 Hz, 4H), 7.19-7.14 (m, 1H), 4.64 (s, 2H), 0.96 (t, *J* = 7.6 Hz, 9H), 0.74 (q, *J* = 7.6 Hz, 6H). <sup>13</sup>C NMR (100 MHz, CDCl<sub>3</sub>): δ 211.8, 137.6, 128.4, 127.6, 126.0, 95.6, 69.7, 7.3, 3.9. IR (neat): 2953, 2874, 1916, 1596, 1490, 1415, 1238, 1003, 974, 812, 760, 732, 718, 695 cm<sup>-1</sup>. HRMS (FI) *m/z*: [M]<sup>+</sup> Calcd for C<sub>15</sub>H<sub>22</sub>Si 230.1485; Found 230.1487.

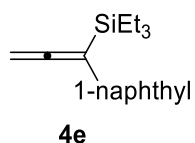

**Triethyl(1-(naphthalen-1-yl)propa-1,2-dien-1-yl)silane (4e).** CuCl (0.03 mmol, 3.0 mg), PPh<sub>3</sub> (0.06 mmol, 15.7 mg), NaHCO<sub>3</sub> (0.6 mmol, 50.4 mg), Et<sub>3</sub>Si-Bpin (0.6 mmol, 145.3 mg) and 1,4-dioxane (1.5 mL), **1zc** (0.3 mmol, 72.1 mg) were stirred at 80 °C for 24 h. Purification by silica gel plate (eluent: petroleum ether) afforded the title product **4e** in 72% yield (60.8 mg) as a colorless oil. <sup>1</sup>H NMR (400 MHz, CDCl<sub>3</sub>): δ 8.10 (d, *J* = 8.8 Hz, 1H), 7.82-7.80 (m, 1H), 7.69 (d, *J* = 8.0 Hz, 1H), 7.48-7.37 (m, 3H), 7.21 (d, *J* = 7.2 Hz, 1H), 4.52 (s, 2H), 0.93 (t, *J* = 7.6 Hz, 9H), 0.66 (q, *J* = 7.6 Hz, 6H). <sup>13</sup>C NMR (100 MHz, CDCl<sub>3</sub>): δ 209.9, 135.5, 134.0, 131.6, 128.3, 126.4, 125.9, 125.6, 125.5, 125.3, 124.9, 93.5, 67.7, 7.3, 3.5. IR (neat): 2952, 2874, 1923, 1576, 1457, 1389, 1237, 1138, 1005, 908, 800, 781, 718, 699 cm<sup>-1</sup>. HRMS (EI) *m/z*: [M]<sup>+</sup> Calcd for C<sub>19</sub>H<sub>24</sub>Si 280.1642; Found 280.1640.

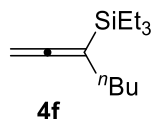

**Triethyl(hepta-1,2-dien-3-yl)silane (4f).** CuCl (0.03 mmol, 3.0 mg), PPh<sub>3</sub> (0.06 mmol, 15.7 mg), NaHCO<sub>3</sub> (0.6 mmol, 50.4 mg), Et<sub>3</sub>Si-Bpin (0.6 mmol, 145.3 mg) and 1,4-dioxane (1.5 mL), **1zd** (0.3 mmol, 51.1 mg) were stirred at 80 °C for 24 h. Purification by silica gel plate (eluent: petroleum ether) afforded the title product **4f** in 62% yield (39.1 mg) as a colorless oil. <sup>1</sup>H NMR (400 MHz, CDCl<sub>3</sub>): δ 4.31 (t, *J* = 3.2 Hz, 2H), 1.93-1.88 (m, 2H), 1.49-1.31 (m, 4H), 0.96-0.88 (m, 12H), 0.61 (q, *J* = 8.0 Hz, 6H). <sup>13</sup>C NMR (100 MHz, CDCl<sub>3</sub>): δ 209.0, 91.5, 68.5,

31.1, 28.7, 22.5, 14.0, 7.3, 3.1. IR (neat): 2954, 2931, 2874, 1925, 1458, 1415, 1378, 1238, 1005, 807, 716  $\text{cm}^{-1}$ . HRMS (EI)  $m/z$ :  $[M]^+$  Calcd for  $\text{C}_{13}\text{H}_{26}\text{Si}$  210.1798; Found 210.1794.

### Synthesis of allenylsilanes 4g-4n.

#### Typical procedure for the synthesis of 4g.

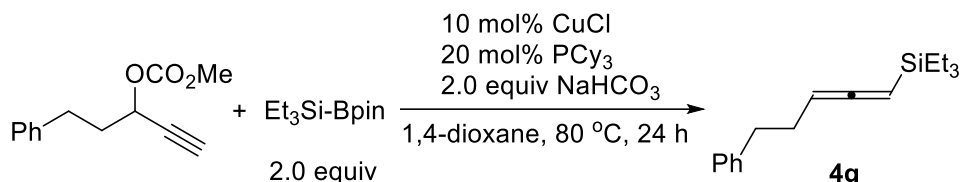

**Triethyl(5-phenylpenta-1,2-dien-1-yl)silane (4g).**  $\text{CuCl}$  (0.02 mmol, 2.0 mg),  $\text{PCy}_3$  (0.04 mmol, 11.2 mg),  $\text{NaHCO}_3$  (0.4 mmol, 33.6 mg),  $\text{Et}_3\text{Si-Bpin}$  (0.4 mmol, 96.9 mg) and 1,4-dioxane (1.0 mL), **1ze** (0.2 mmol, 43.7 mg) were stirred at  $80\text{ }^\circ\text{C}$  for 24 h. Purification by silica gel plate (eluent: petroleum ether) afforded the title product **4g** in 75% yield (38.8 mg) as a colorless oil.  $^1\text{H}$  NMR (400 MHz,  $\text{CDCl}_3$ ):  $\delta$  7.30-7.26 (m, 2H), 7.20-7.16 (m, 3H), 4.85 (dt,  $J = 10.8, 3.6$  Hz, 1H), 4.78 (q,  $J = 6.8$  Hz, 1H), 2.70 (t,  $J = 7.6$  Hz, 2H), 2.31-2.26 (m, 2H), 0.94 (t,  $J = 8.0$  Hz, 9H), 0.57 (q,  $J = 8.0$  Hz, 6H).  $^{13}\text{C}$  NMR (100 MHz,  $\text{CDCl}_3$ ):  $\delta$  210.6, 142.0, 128.5, 128.3, 125.8, 82.3, 78.8, 36.1, 30.0, 7.3, 3.8. The spectroscopic data are in agreement with that previously reported.<sup>13</sup>

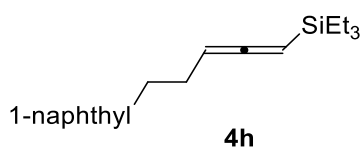

**Triethyl(5-(naphthalen-1-yl)penta-1,2-dien-1-yl)silane (4h).**  $\text{CuCl}$  (0.03 mmol, 3.0 mg),  $\text{PCy}_3$  (0.06 mmol, 16.8 mg),  $\text{NaHCO}_3$  (0.6 mmol, 50.4 mg),  $\text{Et}_3\text{Si-Bpin}$  (0.6 mmol, 145.3 mg) and 1,4-dioxane (1.5 mL), **1zf** (0.3 mmol, 80.5 mg) were stirred at  $80\text{ }^\circ\text{C}$  for 24 h. Purification by silica gel plate (eluent: petroleum ether) afforded the title product **4h** in 72% yield (67.1 mg) as a colorless oil.  $^1\text{H}$  NMR (400 MHz,  $\text{CDCl}_3$ ):  $\delta$  8.03 (q,  $J = 8.0$  Hz, 1H), 7.83 (d,  $J = 7.2$  Hz, 1H), 7.70 (d,  $J = 8.0$  Hz, 1H), 7.47 (dt,  $J = 16.8, 6.4$  Hz, 2H), 7.38 (t,  $J = 7.2$  Hz, 1H), 7.32 (d,  $J = 6.8$  Hz, 1H), 4.91-4.84 (m, 2H), 3.17 (t,  $J = 6.8$  Hz, 2H), 2.45-2.39 (m, 2H), 0.94 (t,  $J = 7.6$  Hz, 9H), 0.57 (q,  $J = 7.6$  Hz, 6H).  $^{13}\text{C}$  NMR (100 MHz,  $\text{CDCl}_3$ ):  $\delta$  210.6, 138.0, 133.9, 131.9, 128.7, 126.6, 126.0, 125.7, 125.5, 125.4, 123.7, 82.5, 79.0, 33.2, 29.3, 7.3, 3.8. IR (neat): 2952,



2909, 2873, 1935, 1597, 1510, 1457, 1413, 1395, 1376, 1236, 1007, 854, 775, 720  $\text{cm}^{-1}$ . HRMS (EI)  $m/z$ :  $[M]^+$  Calcd for  $\text{C}_{21}\text{H}_{28}\text{Si}$  308.1955; Found 308.1958.

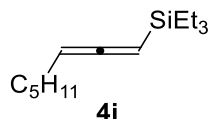

**Triethyl(octa-1,2-dien-1-yl)silane (4i).** CuCl (0.03 mmol, 3.0 mg),  $\text{PCy}_3$  (0.06 mmol, 16.8 mg),  $\text{NaHCO}_3$  (0.6 mmol, 50.4 mg),  $\text{Et}_3\text{Si-Bpin}$  (0.6 mmol, 145.3 mg) and 1,4-dioxane (1.5 mL), **1zg** (0.3 mmol, 55.3 mg) were stirred at 80 °C for 24 h. Purification by silica gel plate (eluent: petroleum ether) afforded the title product **4i** in 74% yield (50.0 mg) as a colorless oil.  $^1\text{H}$  NMR (400 MHz,  $\text{CDCl}_3$ ):  $\delta$  4.82 (dt,  $J = 6.8, 4.0$  Hz, 1H), 4.73 (q,  $J = 6.8$  Hz, 1H), 1.99-1.93 (m, 2H), 1.43-1.29 (m, 6H), 0.95 (t,  $J = 8.0$  Hz, 9H), 0.89 (t,  $J = 7.2$  Hz, 3H), 0.58 (q,  $J = 8.0$  Hz, 6H).  $^{13}\text{C}$  NMR (100 MHz,  $\text{CDCl}_3$ ):  $\delta$  210.8, 82.9, 78.2, 31.4, 29.5, 28.0, 22.5, 14.1, 7.3, 3.9. IR (neat): 2954, 2932, 2874, 2173, 1936, 1458, 1415, 1378, 1339, 1236, 1132, 1016, 974, 856, 722  $\text{cm}^{-1}$ . HRMS (FI)  $m/z$ :  $[M]^+$  Calcd for  $\text{C}_{14}\text{H}_{28}\text{Si}$  224.1955; Found 224.1957.

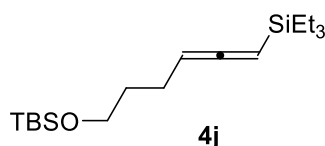

**tert-Butyldimethyl((6-(triethylsilyl)hexa-4,5-dien-1-yl)oxy)silane (4j).** CuCl (0.03 mmol, 3.0 mg),  $\text{PCy}_3$  (0.06 mmol, 16.8 mg),  $\text{NaHCO}_3$  (0.6 mmol, 50.4 mg),  $\text{Et}_3\text{Si-Bpin}$  (0.6 mmol, 145.3 mg) and 1,4-dioxane (1.5 mL), **1zh** (0.3 mmol, 85.9 mg) were stirred at 80 °C for 24 h. Purification by silica gel column (eluent: petroleum ether: ethyl acetate = 50: 1) afforded the title product **4j** in 88% yield (86.4 mg) as a yellow oil.  $^1\text{H}$  NMR (400 MHz,  $\text{CDCl}_3$ ):  $\delta$  4.84 (dt,  $J = 7.2, 3.6$  Hz, 1H), 4.74 (q,  $J = 7.2$  Hz, 1H), 3.64 (t,  $J = 6.4$  Hz, 2H), 2.05-2.00 (m, 2H), 1.65-1.59 (m, 2H), 0.95 (t,  $J = 8.0$  Hz, 9H), 0.89 (s, 9H), 0.58 (q,  $J = 8.0$  Hz, 6H), 0.05 (s, 6H).  $^{13}\text{C}$  NMR (100 MHz,  $\text{CDCl}_3$ ):  $\delta$  210.8, 82.5, 78.5, 62.6, 32.8, 25.9, 24.3, 18.3, 7.3, 3.8, -5.3. IR (neat): 2954, 2930, 2876, 1936, 1463, 1413, 1386, 1361, 1254, 1099, 1005, 834, 813, 775, 722  $\text{cm}^{-1}$ . HRMS (FI)  $m/z$ :  $[M]^+$  Calcd for  $\text{C}_{18}\text{H}_{38}\text{OSi}_2$  326.2456; Found 326.2450.

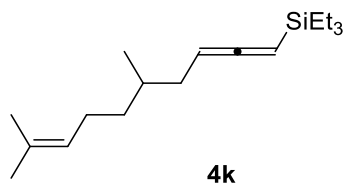

**(5,9-Dimethyldeca-1,2,8-trien-1-yl)triethylsilane (4k).** CuCl (0.03 mmol, 3.0 mg), PCy<sub>3</sub> (0.06 mmol, 16.8 mg), NaHCO<sub>3</sub> (0.6 mmol, 50.4 mg), Et<sub>3</sub>Si-Bpin (0.6 mmol, 145.3 mg) and 1,4-dioxane (1.5 mL), **1zi** (0.3 mmol, 71.5 mg) were stirred at 80 °C for 24 h. Purification by silica gel plate (eluent: petroleum ether) afforded the title product **4k** in 95% yield (79.5 mg) as a colorless oil. <sup>1</sup>H NMR (400 MHz, CDCl<sub>3</sub>): δ 5.10 (t, *J* = 6.8 Hz, 1H), 4.81-4.78 (m, 1H), 4.69 (q, *J* = 7.2 Hz, 1H), 2.03-1.81 (m, 4H), 1.68 (s, 3H), 1.60 (s, 3H), 1.52-1.35 (m, 2H), 1.92-1.11 (m, 1H), 0.95 (t, *J* = 8.0 Hz, 9H), 0.91 (d, *J* = 6.4 Hz, 3H), 0.58 (q, *J* = 8.0 Hz, 6H). <sup>13</sup>C NMR (100 MHz, CDCl<sub>3</sub>): δ 211.3, 131.0, 124.9, 81.2, 81.0, 77.42, 77.36, 36.59, 36.56, 35.8, 35.7, 33.34, 33.28, 25.70, 25.65, 25.6, 19.43, 19.40, 17.6, 7.3, 3.9. IR (neat): 2954, 2912, 2875, 1935, 1457, 1415, 1377, 1236, 1016, 974, 857, 722 cm<sup>-1</sup>. HRMS (FI) *m/z*: [M]<sup>+</sup> Calcd for C<sub>18</sub>H<sub>34</sub>Si 278.2424; Found 278.2431.

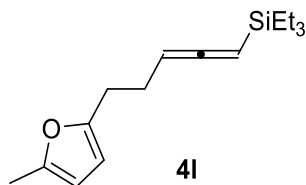

**Triethyl(5-(5-methylfuran-2-yl)penta-1,2-dien-1-yl)silane (4l).** CuCl (0.03 mmol, 3.0 mg), PCy<sub>3</sub> (0.06 mmol, 16.8 mg), NaHCO<sub>3</sub> (0.6 mmol, 50.4 mg), Et<sub>3</sub>Si-Bpin (0.6 mmol, 145.3 mg) and 1,4-dioxane (1.5 mL), **1zj** (0.3 mmol, 66.7 mg) were stirred at 80 °C for 24 h. Purification by silica gel column (eluent: petroleum ether) afforded the title product **4l** in 91% yield (72.0 mg) as a yellow oil. <sup>1</sup>H NMR (400 MHz, CDCl<sub>3</sub>): δ 5.85 (d, *J* = 8.0 Hz, 2H), 4.86 (dt, *J* = 6.8, 3.6 Hz, 1H), 4.78 (q, *J* = 6.4 Hz, 1H), 2.66 (t, *J* = 7.6 Hz, 2H), 2.31-2.27 (m, 2H), 2.24 (s, 3H), 0.94 (t, *J* = 8.0 Hz, 9H), 0.58 (q, *J* = 8.0 Hz, 6H). <sup>13</sup>C NMR (100 MHz, CDCl<sub>3</sub>): δ 210.5, 153.8, 150.2, 105.8, 105.5, 82.0, 78.9, 28.3, 26.7, 13.5, 7.3, 3.8. IR (neat): 2953, 2911, 2875, 1936, 1699, 1570, 1457, 1414, 1377, 1237, 1017, 963, 856, 778, 720 cm<sup>-1</sup>. HRMS (FI) *m/z*: [M]<sup>+</sup> Calcd for C<sub>16</sub>H<sub>26</sub>OSi 262.1747; Found 262.1751.

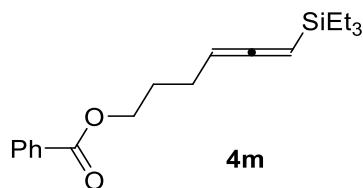

**6-(Triethylsilyl)hexa-4,5-dien-1-yl benzoate (4m).** CuCl (0.03 mmol, 3.0 mg), PCy<sub>3</sub> (0.06 mmol, 16.8 mg), NaHCO<sub>3</sub> (0.6 mmol, 50.4 mg), Et<sub>3</sub>Si-Bpin (0.6 mmol, 145.3 mg) and 1,4-dioxane (1.5 mL), **1zk** (0.3 mmol, 82.9 mg) were stirred at 80 °C for 24 h. Purification by silica gel column (eluent: petroleum ether to petroleum ether: ethyl acetate = 100: 1) afforded the title product **4m** in 76% yield (72.4 mg) as a colorless oil. <sup>1</sup>H NMR (400 MHz, CDCl<sub>3</sub>): δ 8.05 (d, *J* = 8.4 Hz, 2H), 7.54 (t, *J* = 8.8 Hz, 1H), 7.43 (t, *J* = 8.0 Hz, 2H), 4.89 (dt, *J* = 7.2, 3.6 Hz, 1H), 4.79 (q, *J* = 6.8 Hz, 1H), 4.38-4.35 (m, 2H), 2.17-2.12 (m, 2H), 1.92-1.85 (m, 2H), 0.94 (t, *J* = 8.0 Hz, 9H), 0.58 (q, *J* = 7.6 Hz, 6H). <sup>13</sup>C NMR (100 MHz, CDCl<sub>3</sub>): δ 210.6, 166.6, 132.7, 130.4, 129.5, 128.2, 81.7, 79.0, 64.3, 28.6, 24.5, 7.2, 3.8 cm<sup>-1</sup>. IR (neat): 2952, 2910, 2874, 1936, 1720, 1451, 1269, 1114, 855, 708, 687 cm<sup>-1</sup>. HRMS (EI) *m/z*: [M-H]<sup>+</sup> Calcd for C<sub>19</sub>H<sub>27</sub>O<sub>2</sub>Si 315.1775; Found 315.1780.

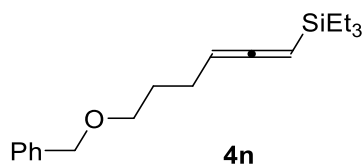

**(6-(Benzyloxy)hexa-1,2-dien-1-yl)triethylsilane (4n).** CuCl (0.03 mmol, 3.0 mg), PCy<sub>3</sub> (0.06 mmol, 16.8 mg), NaHCO<sub>3</sub> (0.6 mmol, 50.4 mg), Et<sub>3</sub>Si-Bpin (0.6 mmol, 145.3 mg) and 1,4-dioxane (1.5 mL), **1zl** (0.3 mmol, 78.7 mg) were stirred at 80 °C for 24 h. Purification by silica gel column (eluent: petroleum ether to petroleum ether: ethyl acetate = 100: 1) afforded the title product **4n** in 73% yield (66.6 mg) as a colorless oil. <sup>1</sup>H NMR (400 MHz, CDCl<sub>3</sub>): δ 7.33 (d, *J* = 4.4 Hz, 4H), 7.29-7.25 (m, 1H), 4.84 (dt, *J* = 6.8, 3.6 Hz, 1H), 4.74 (q, *J* = 6.8 Hz, 1H), 4.50 (s, 2H), 3.51 (t, *J* = 6.4 Hz, 2H), 2.10-2.04 (m, 2H), 1.76-1.69 (m, 2H), 0.94 (t, *J* = 8.0 Hz, 9H), 0.58 (q, *J* = 8.0 Hz, 6H). <sup>13</sup>C NMR (100 MHz, CDCl<sub>3</sub>): δ 210.7, 138.6, 128.3, 127.6, 127.5, 82.3, 78.7, 72.9, 69.8, 29.7, 24.7, 7.3, 3.8 cm<sup>-1</sup>. IR (neat): 2950, 2910, 2873, 1935, 1454, 1377, 1363, 1237, 1102, 1016, 854, 720, 696 cm<sup>-1</sup>. HRMS (EI) *m/z*: [M-C<sub>2</sub>H<sub>7</sub>]<sup>+</sup> Calcd for C<sub>17</sub>H<sub>23</sub>OSi 271.1513; Found 271.1508.

### Synthesis of allenylsilane 4o.

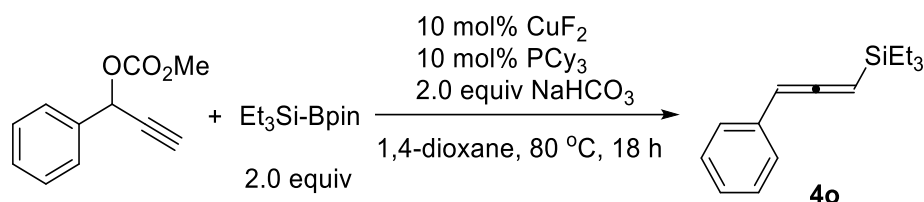

**Triethyl(3-phenylpenta-1,2-dien-1-yl)silane (4o).**  $\text{CuF}_2$  (0.03 mmol, 3.0 mg),  $\text{PCy}_3$  (0.03 mmol, 8.4 mg),  $\text{NaHCO}_3$  (0.6 mmol, 50.4 mg),  $\text{Et}_3\text{Si-Bpin}$  (0.6 mmol, 145.3 mg) and 1,4-dioxane (1.5 mL), **1zm** (0.3 mmol, 57.1 mg) were stirred at 80 °C for 18 h. Purification by silica gel plate (eluent: petroleum ether) afforded the title product **4o** in 41% yield (28.6 mg) as a colorless oil.  $^1\text{H}$  NMR (400 MHz,  $\text{CDCl}_3$ ):  $\delta$  7.29-7.22 (m, 4H), 7.13 (t,  $J = 7.2$  Hz, 1H), 5.84 (d,  $J = 6.8$  Hz, 1H), 5.37 (d,  $J = 7.2$  Hz, 1H), 0.98 (t,  $J = 8.0$  Hz, 9H), 0.65 (q,  $J = 8.0$  Hz, 6H).  $^{13}\text{C}$  NMR (100 MHz,  $\text{CDCl}_3$ ):  $\delta$  210.8, 135.1, 128.5, 126.0, 125.8, 87.5, 83.2, 7.3, 3.9. IR (neat): 2953, 2909, 2874, 1921, 1596, 1495, 1456, 1413, 1237, 1179, 1016, 858, 765, 720, 695  $\text{cm}^{-1}$ . HRMS (EI)  $m/z$ :  $[\text{M}]^+$  Calcd for  $\text{C}_{15}\text{H}_{22}\text{Si}$  230.1485; Found 230.1480.

### Synthesis of allenylsilane 5.

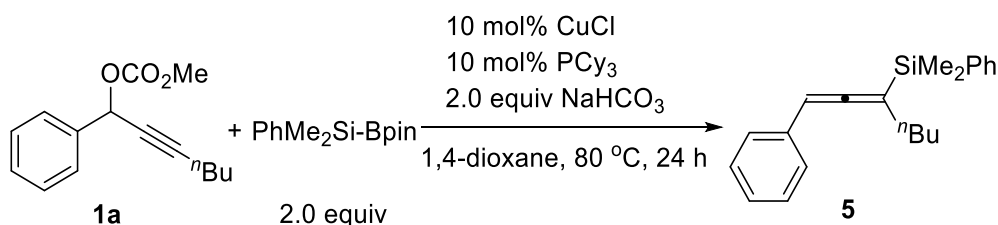

**Dimethyl(phenyl)(1-phenylhepta-1,2-dien-3-yl)silane (5).**  $\text{CuCl}$  (0.03 mmol, 3.0 mg),  $\text{PCy}_3$  (0.03 mmol, 8.4 mg),  $\text{NaHCO}_3$  (0.6 mmol, 50.4 mg),  $\text{PhMe}_2\text{Si-Bpin}$  (0.6 mmol, 157.3 mg) and 1,4-dioxane (1.5 mL), **1a** (0.3 mmol, 73.9 mg) were stirred at 80 °C for 24 h. Purification by silica gel plate (eluent: petroleum ether) afforded the title product **5** in 87% yield (79.6 mg) as a colorless oil.  $^1\text{H}$  NMR (400 MHz,  $\text{CDCl}_3$ ):  $\delta$  7.58-7.56 (m, 2H), 7.36-7.35 (m, 3H), 7.29-7.22 (m, 4H), 7.15-7.11 (m, 1H), 5.94 (t,  $J = 2.8$  Hz, 1H), 2.08-2.01 (m, 2H), 1.47-1.40 (m, 2H), 1.30-1.24 (m, 2H), 0.80 (t,  $J = 7.2$  Hz, 3H), 0.40 (d,  $J = 8.0$  Hz, 6H).  $^{13}\text{C}$  NMR (100 MHz,  $\text{CDCl}_3$ ):  $\delta$  206.4, 137.8, 136.0, 133.8, 129.2, 128.5, 127.8, 125.9, 125.8, 100.0, 90.4, 31.3, 29.4, 22.4, 13.9, -2.86, -2.94 The spectroscopic data are in agreement with that previously reported.<sup>2</sup>

### 1 mmol Scale reaction of 1a.

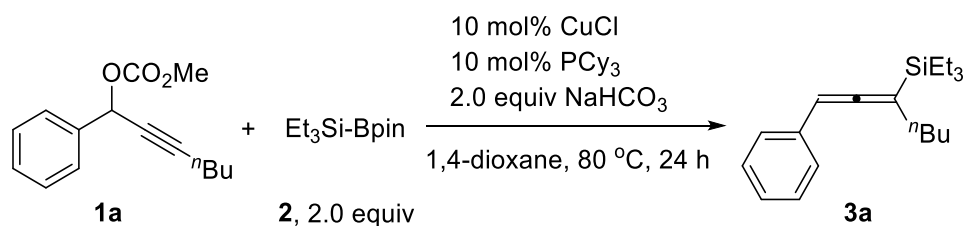

**Triethyl(1-phenylhepta-1,2-dien-3-yl)silane (3a).** In the nitrogen-filled glove box,  $\text{CuCl}$  (0.1 mmol, 9.9 mg),  $\text{PCy}_3$  (0.1 mmol, 28.0 mg),  $\text{NaHCO}_3$  (2.0 mmol, 168.0 mg),  $\text{Et}_3\text{SiBpin}$  (2.0 mmol, 484.5 mg), 1,4-dioxane (5 mL) was added to the sealing tube. The solvent stirred at ambient temperature for 1 minute. Then **1a** (1.0 mmol, 246.3 mg) was added. The tube was sealed and taken outside the glove box. The tube was immersed into an oil bath preheated at 80 °C. After the reaction mixture was stirred at 80 °C for 24 h. The mixture was filtered over a silica gel pad and washed with ethyl acetate. The solvent was evaporated under the reduced pressure. Purification by silica gel column (eluent: petroleum ether) afforded the title product **3a** in 86% yield (246.7 mg) as a yellow oil.  $^1\text{H NMR}$  (400 MHz,  $\text{CDCl}_3$ ):  $\delta$  7.28-7.22 (m, 4H), 7.12 (t,  $J = 6.8$  Hz, 1H), 5.85 (bs, 1H), 2.10-2.03 (m, 2H), 1.52-1.45 (m, 2H), 1.38-1.32 (m, 2H), 0.96 (t,  $J = 8.0$  Hz, 9H), 0.88 (t,  $J = 7.2$  Hz, 3H), 0.65 (q,  $J = 8.0$  Hz, 6H).

### References:

- (1) T, Boebel.; J, Hartwig. Iridium-Catalyzed Preparation of Silylboranes by Silane Borylation and Their Use in the Catalytic Borylation of Arenes. *Organometallics* **2008**, *27*, 6013-6019.
- (2) H, Ohmiya.; H, Ito.; M, Sawamura. General and functional group-tolerable approach to allenylsilanes by rhodium-catalyzed coupling between propargylic carbonates and a silylboronate. *Org. Lett.* **2009**, *11*, 5618-5620.
- (3) A, Qin.; G, Zhu.; Q, Chen.; H, Qian.; S, Ma. Palladium-catalyzed desulfinitative cross-coupling reaction of sodium sulfinates with propargylic carbonates. *Adv. Synth. Catal.* **2019**, *361*, 4656-4660.
- (4) T. N, Zhao.; Y, Yang.; T, Lessing.; K. J, Szabó. Borylation of propargylic substrates by bimetallic catalysis. Synthesis of allenyl, propargylic, and butadienyl Bpin derivatives. *J. Am. Chem. Soc.* **2014**, *136*, 7563-7566.
- (5) N, Sun.; M, Chen.; Y, Liu. Gold-catalyzed oxidative reactions of propargylic carbonates involving 1,2-carbonate migration: Stereoselective synthesis of functionalized alkenes. *J. Org.*

*Chem.* **2014**, *79*, 4055-4067.

(6) H, Ito.; Y, Sasaki.; M, Sawamura. Copper(I)-catalyzed substitution of propargylic carbonates with diboron: selective synthesis of multisubstituted allenylboronates. *J. Am. Chem. Soc.* **2008**, *130*, 15774-15775.

(7) R, Shen.; J, Yang.; S, Zhu.; C, Chen.; L, Wu. Gold(I)-catalyzed decarboxylation of propargyl carbonates: reactivity reversal of the gold catalyst from  $\Pi$ -Lewis acidity to  $\sigma$ -Lewis Acidity. *Adv. Synth. Catal.* **2015**, *357*, 1259-1269.

(8) K, Sato.; Y, Ogiwara.; N, Sakai. Palladium-catalyzed [5 + 1] annulation of salicylic acid derivatives and propargylic carbonates. *Bull. Chem. Soc. Japan* **2020**, *93*, 1595-1602.

(9) G, Molander.; E, Sommers.; S, Neufeldt. Palladium(0)- catalyzed synthesis of chiral ene-allenes using alkenyl trifluoroborates. *J. Org. Chem.* **2006**, *71*, 1563-1568.

(10) X, Min.; X. R, Xu.; Y, He. Axial-to-central chirality transfer for construction of quaternary stereocenters via dearomatization of BINOLs. *Org. Lett.* **2019**, *21*, 9188-9193.

(11) M, Yoshida.; M, Higuchi.; K, Shishido. Stereoselective construction of substituted chromans by palladium-catalyzed cyclization of propargylic carbonates with 2-(2-Hydroxyphenyl)acetates. *Org. Lett.* **2009**, *11*, 4752-4755.

(12) Y, Wang.; G, Pritchard.; M, Kimber. A General Convergent Strategy for the Synthesis of Tetra-Substituted Furan Fatty Acids (FuFAs). *Eur. J. Org. Chem.* **2020**, 2914-2922.

(13) V, Sabbasani.; D, Lee. Nitration of Silyl Allenes To Form Functionalized Nitroalkenes. *Org. Lett.* **2013**, *15*, 3954-3957.

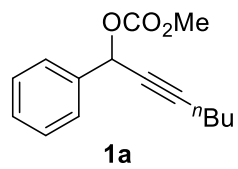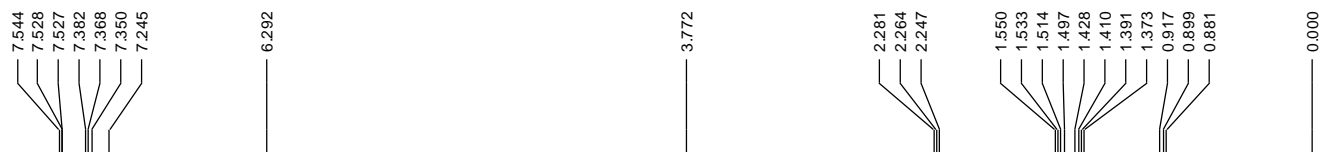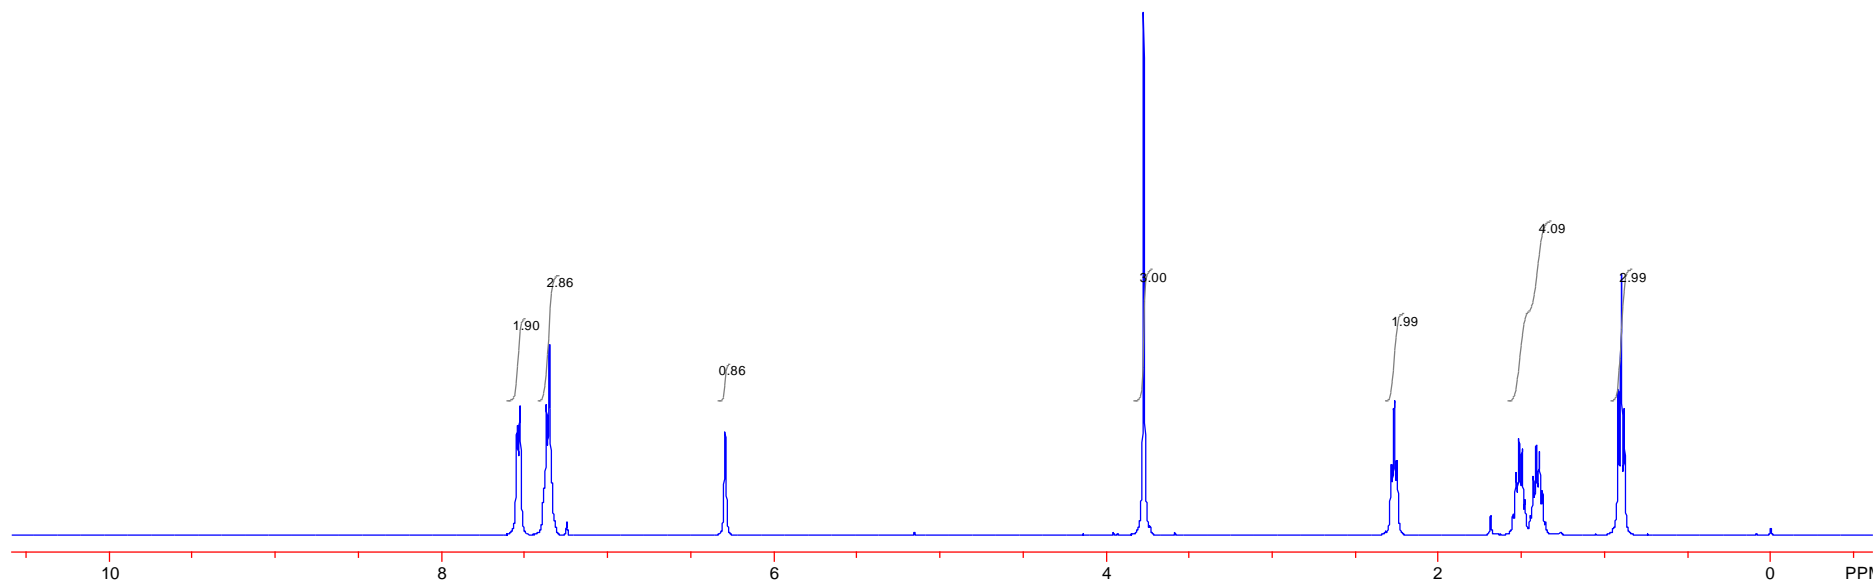

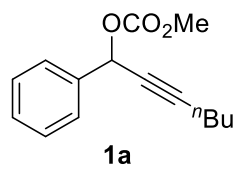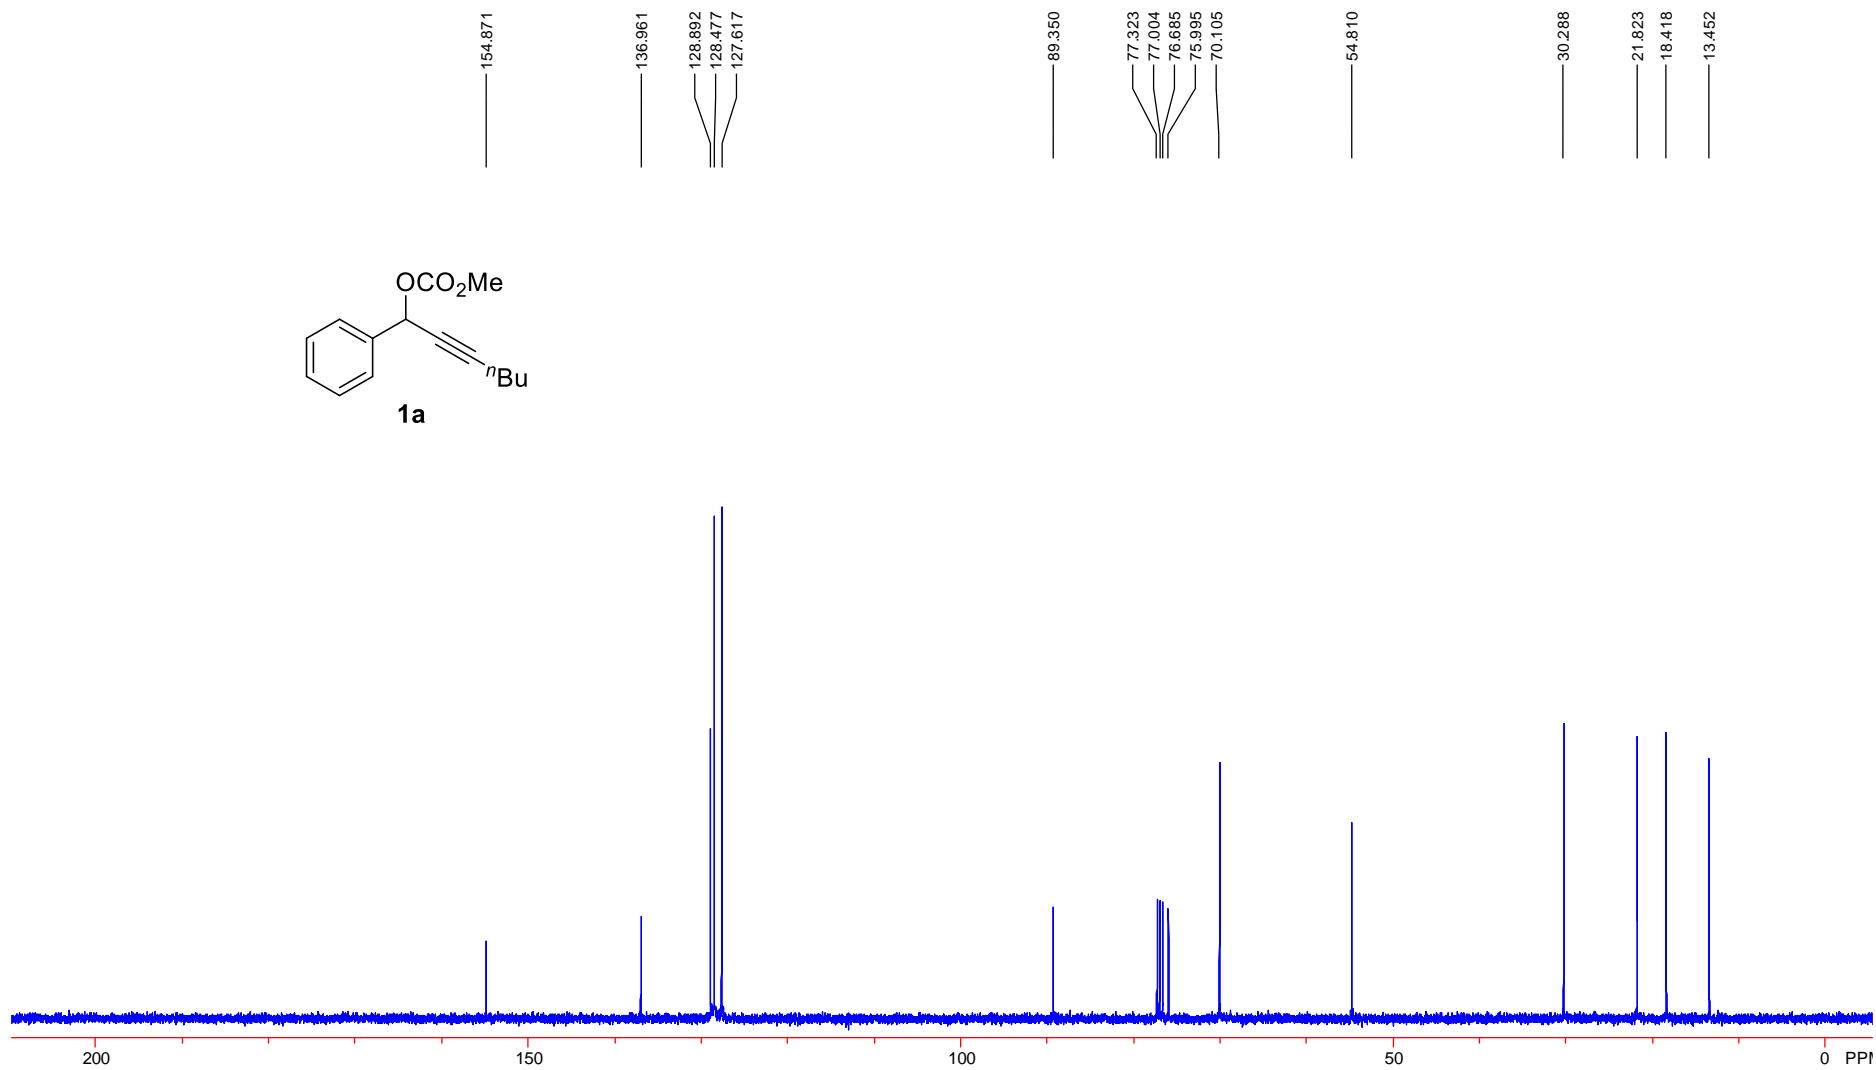



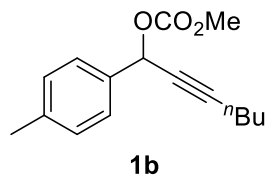

7.435  
7.415  
7.246  
7.183  
7.164

6.254

3.770

2.344  
2.282  
2.277  
2.264  
2.260  
2.247  
2.242  
1.532  
1.514  
1.495  
1.447  
1.411  
1.392  
1.392  
0.918  
0.900  
0.882

-0.000

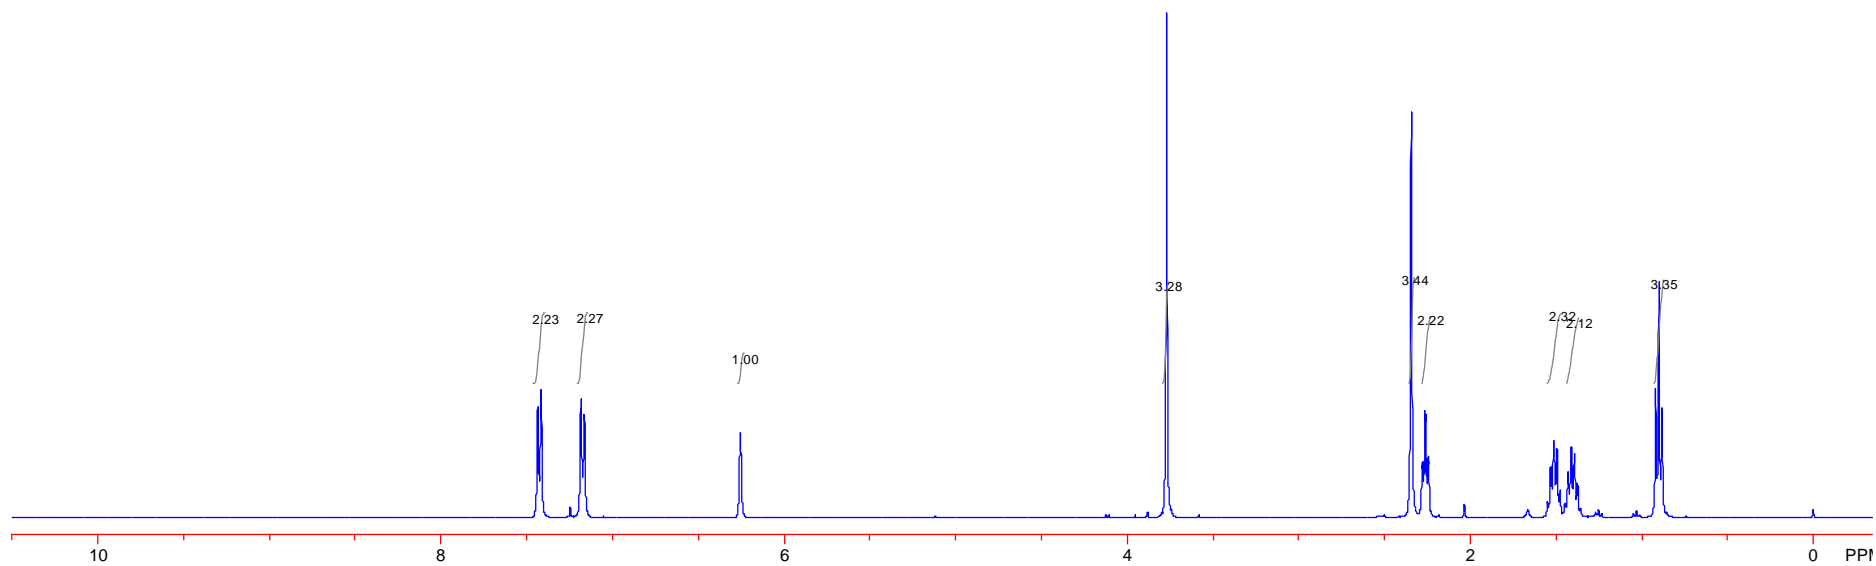

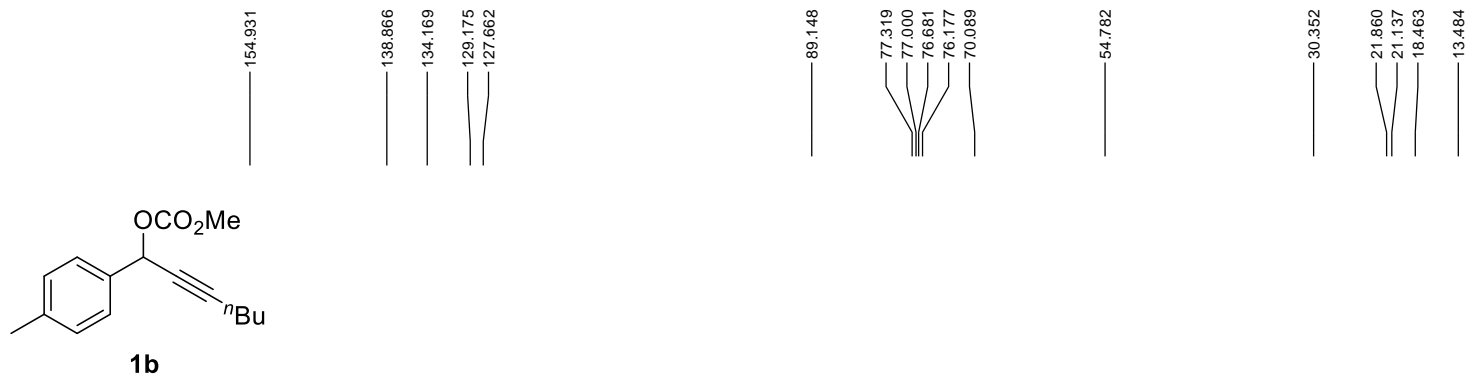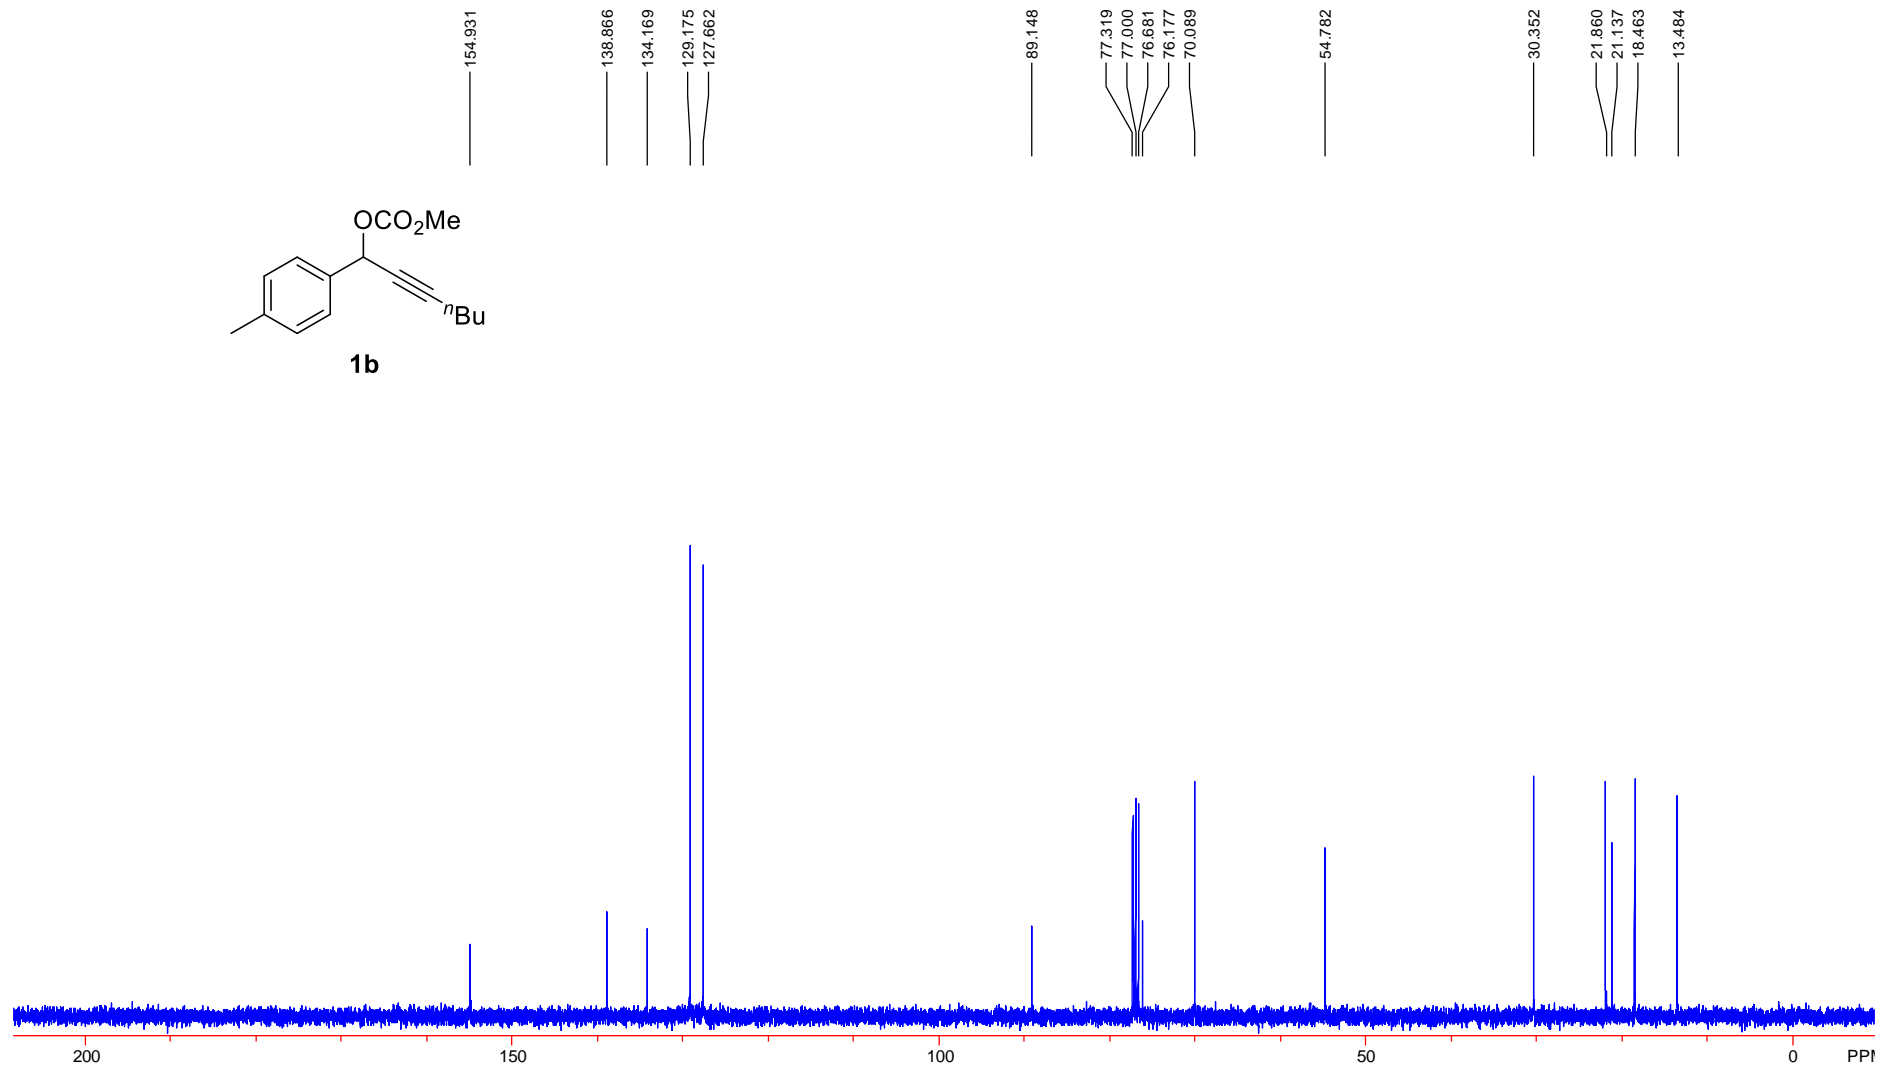

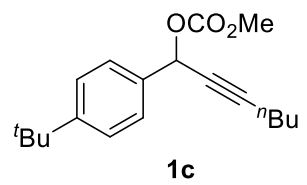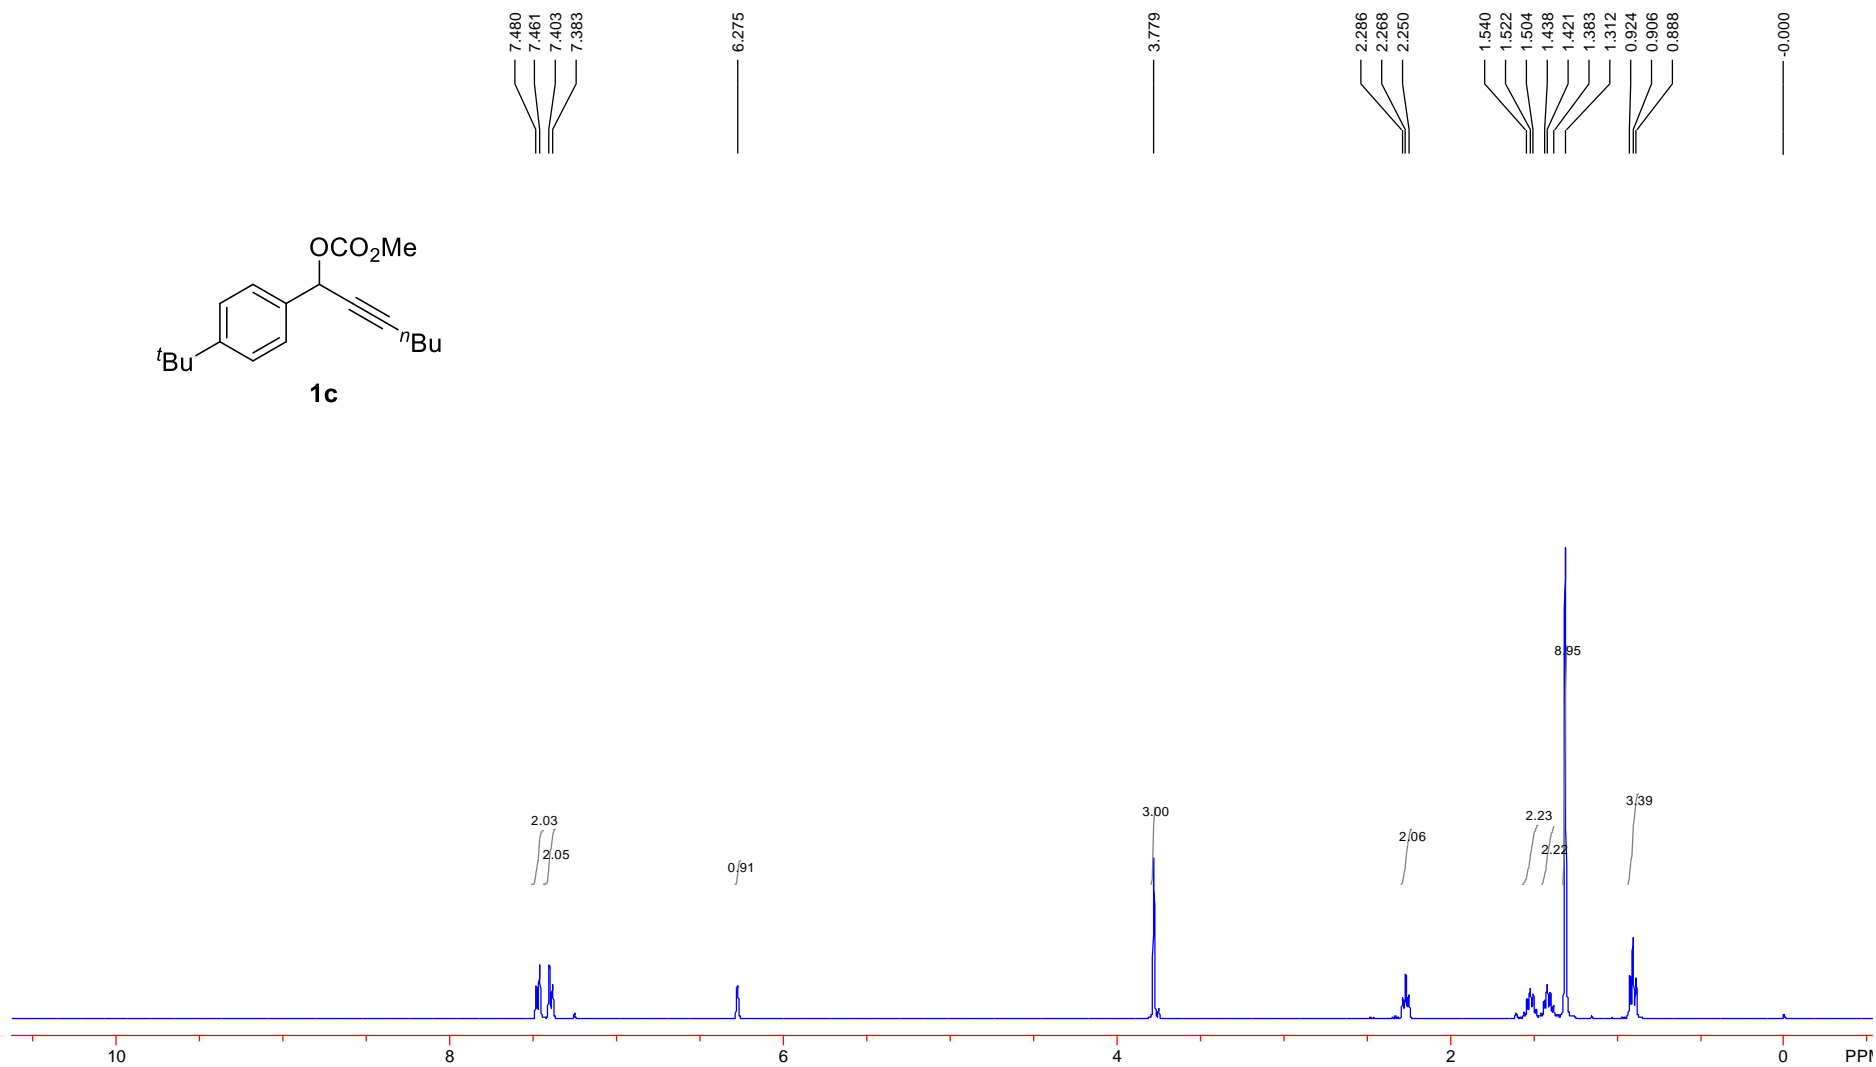

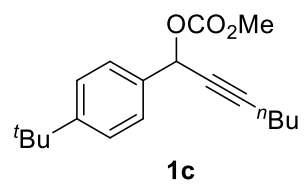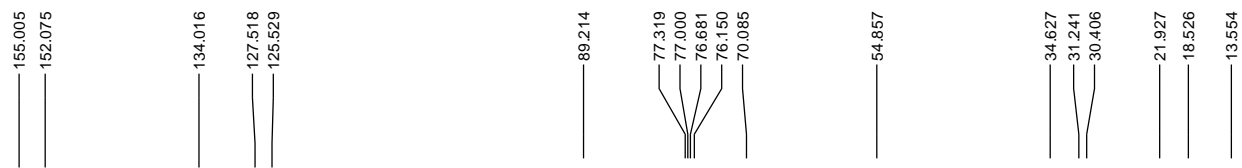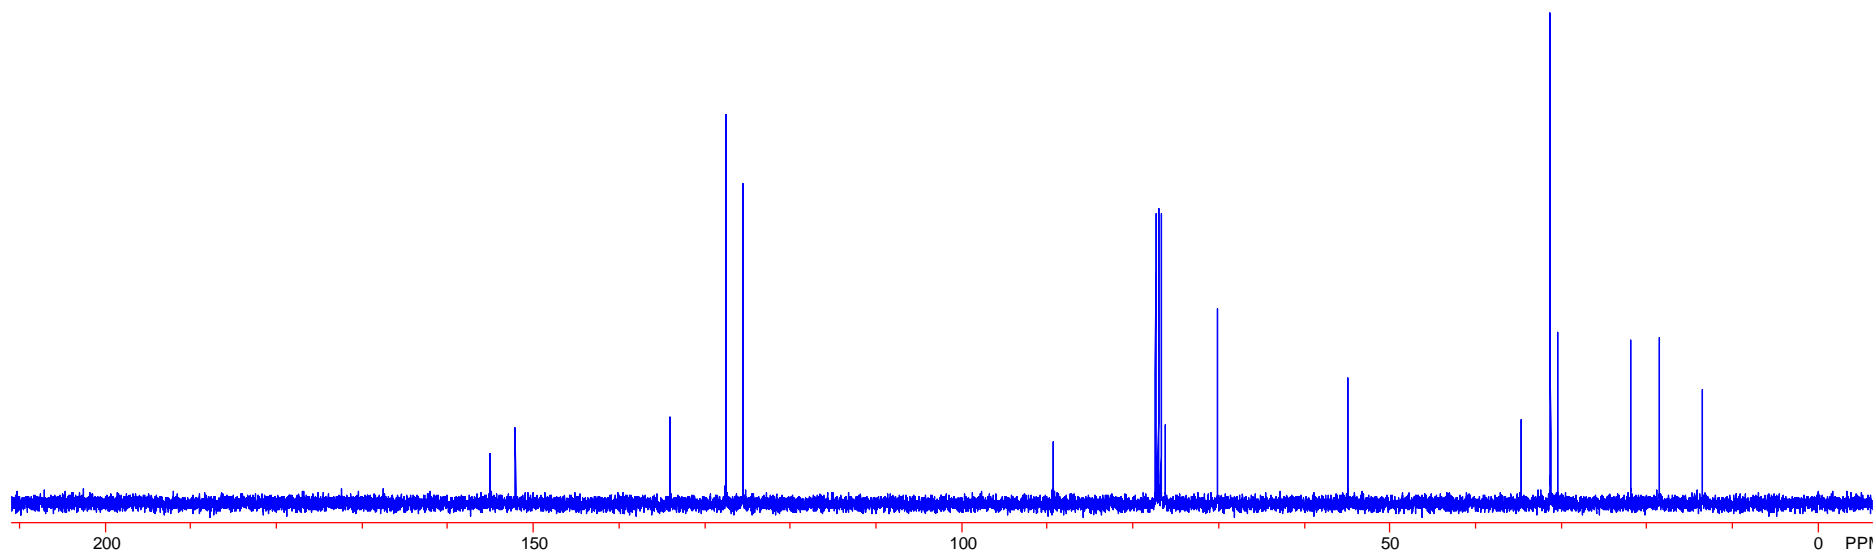

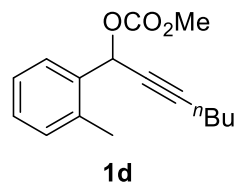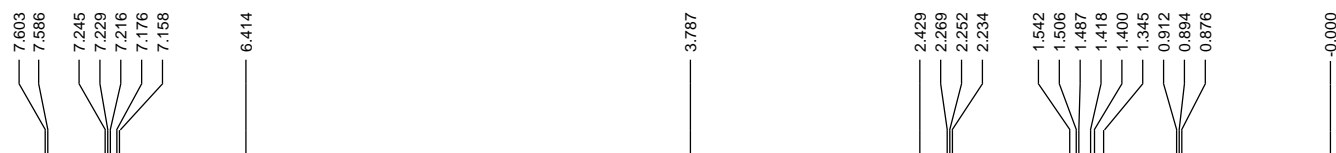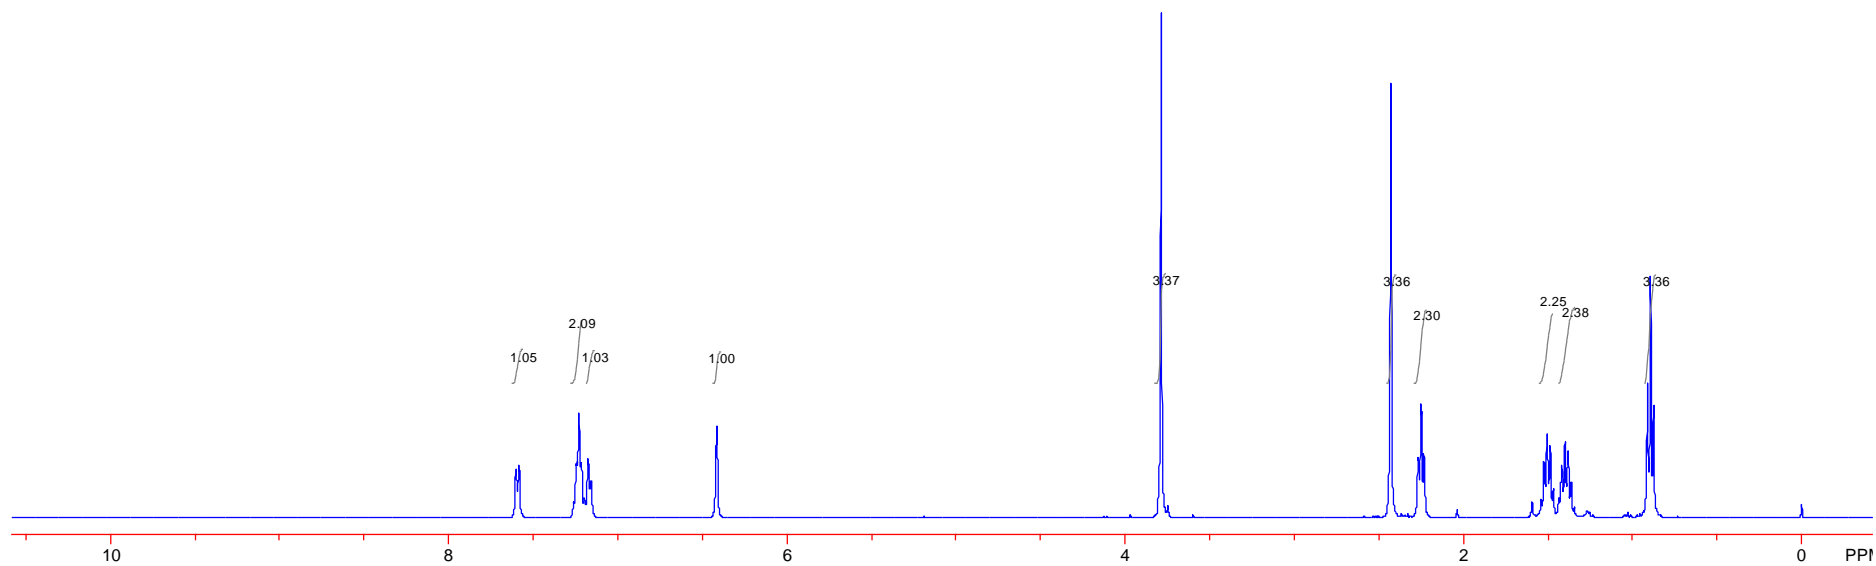

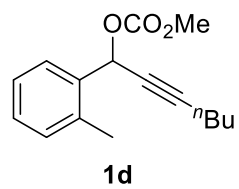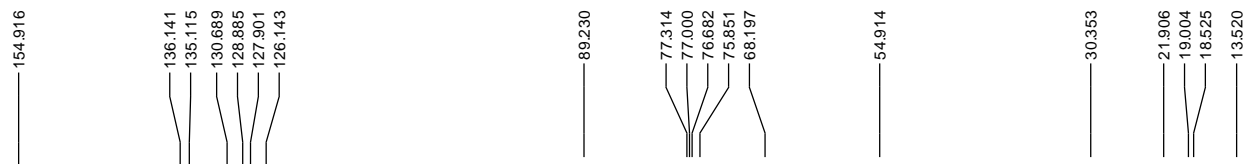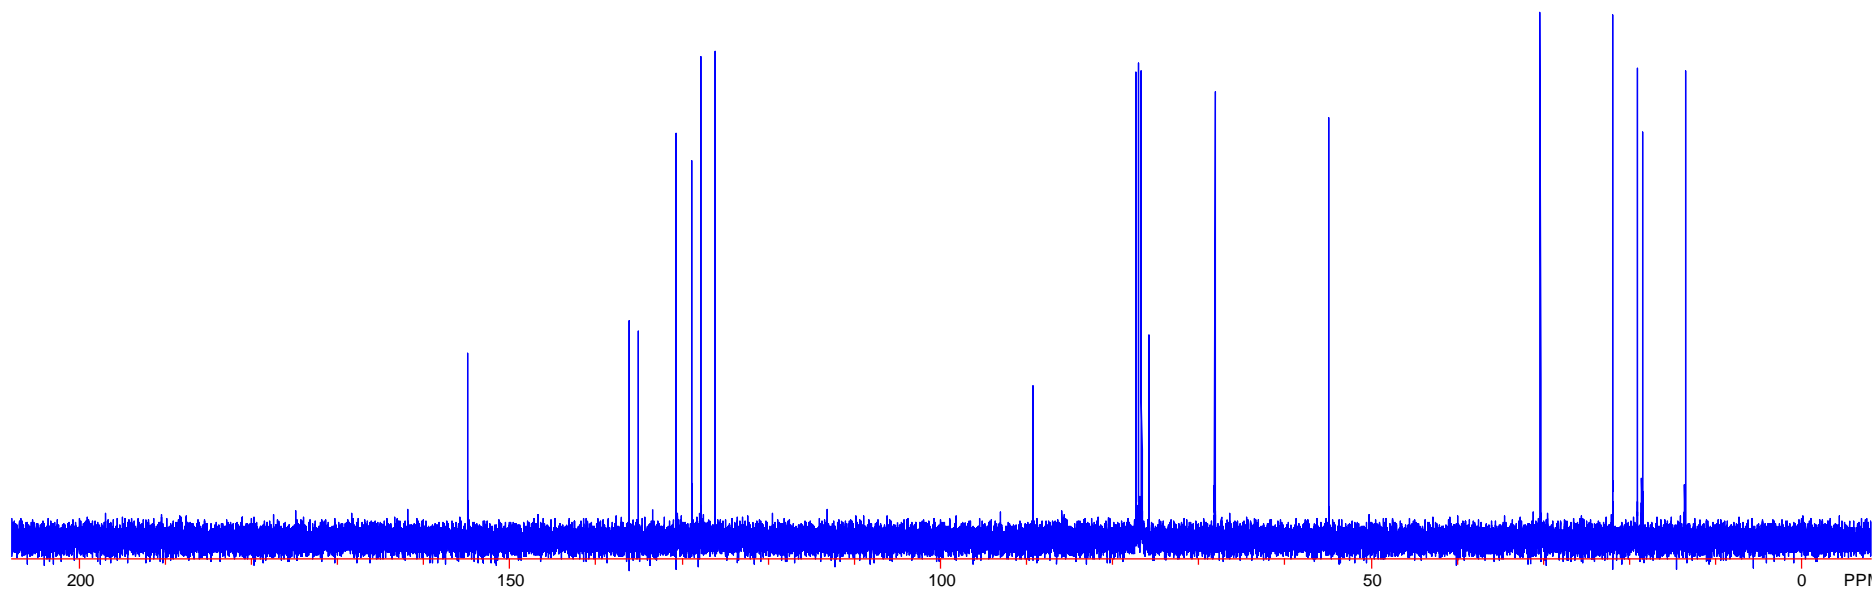

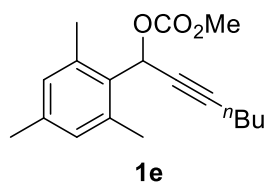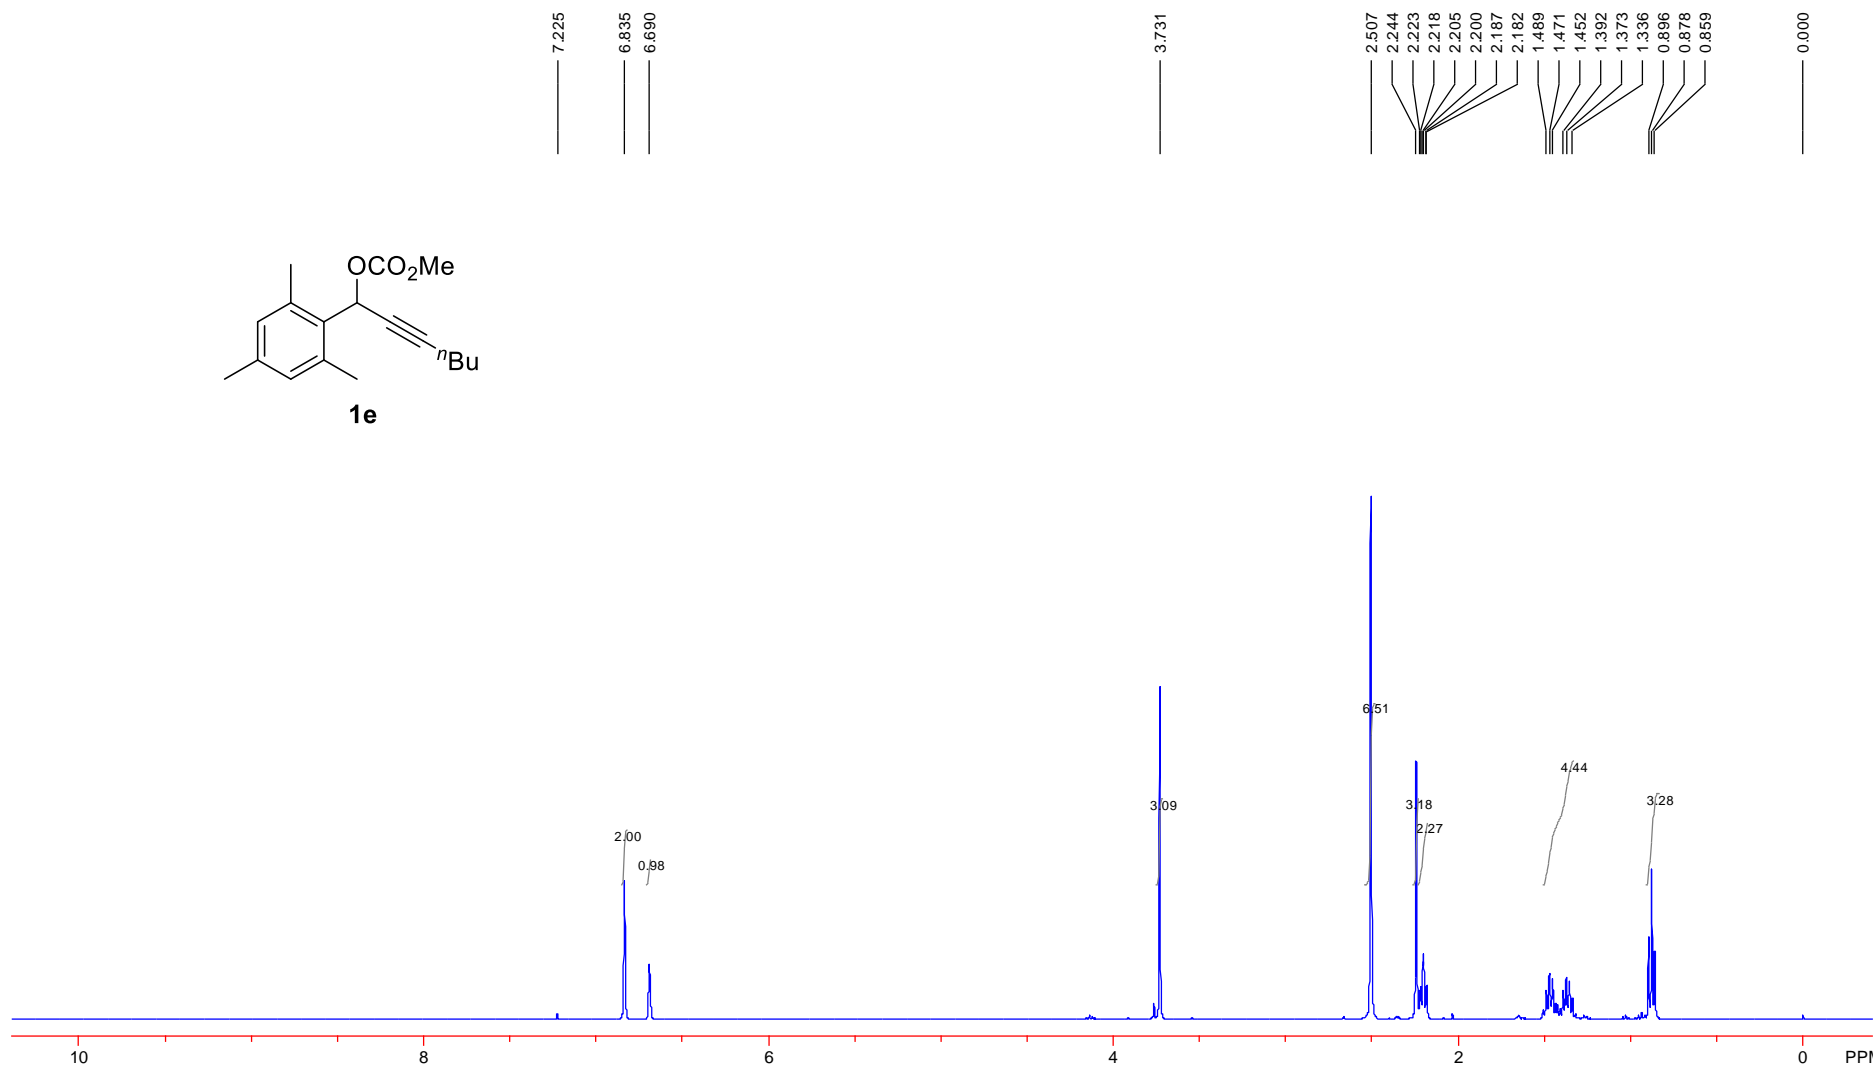

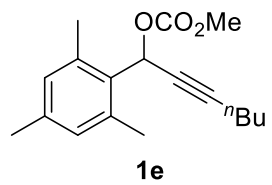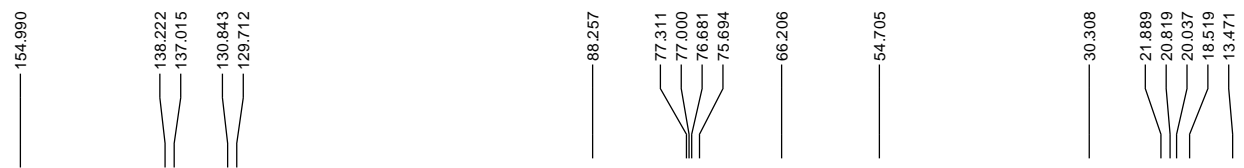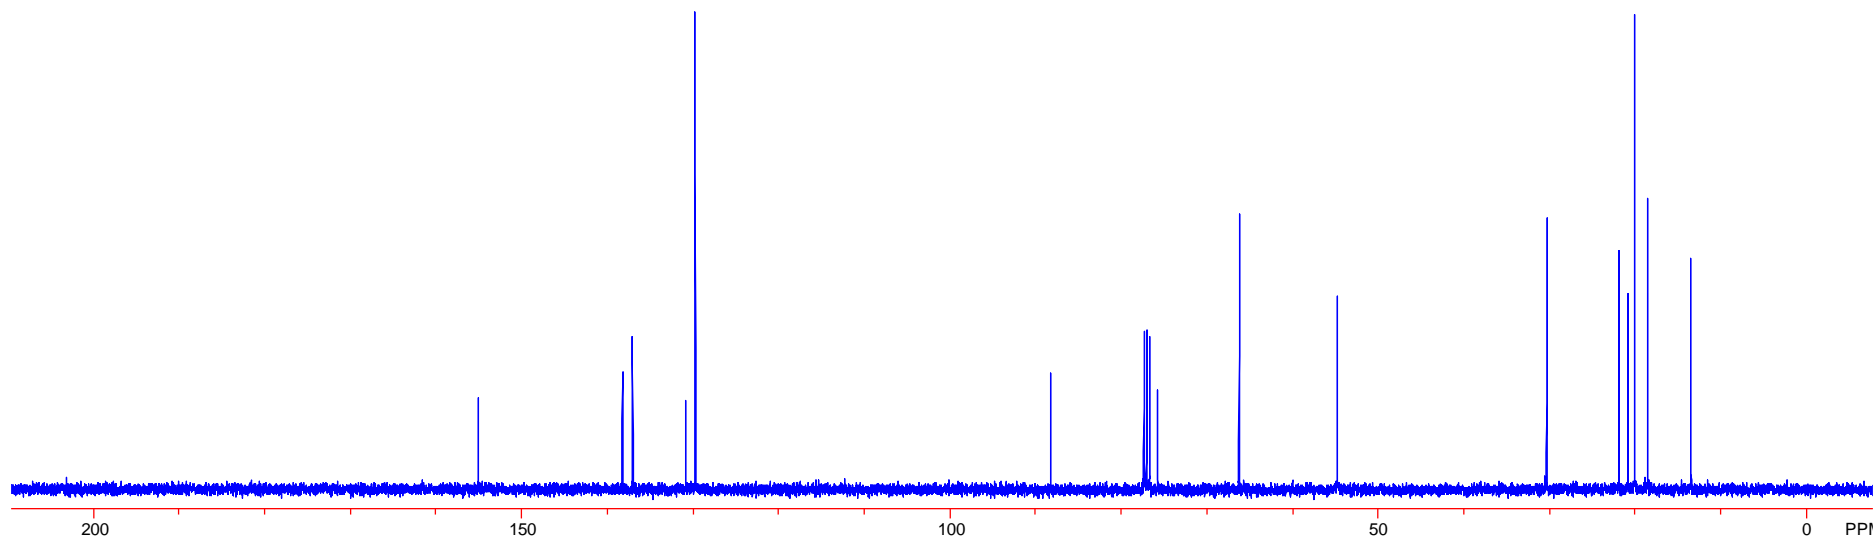



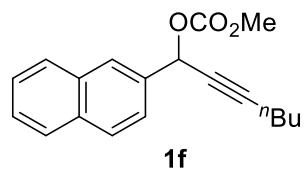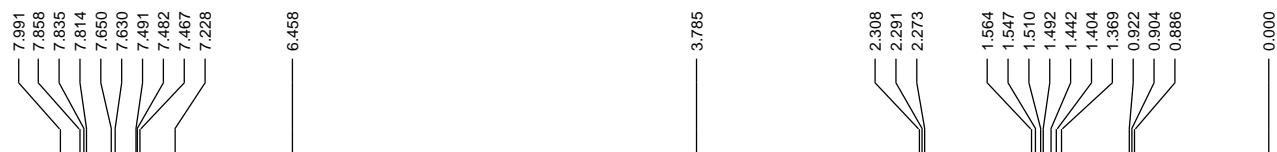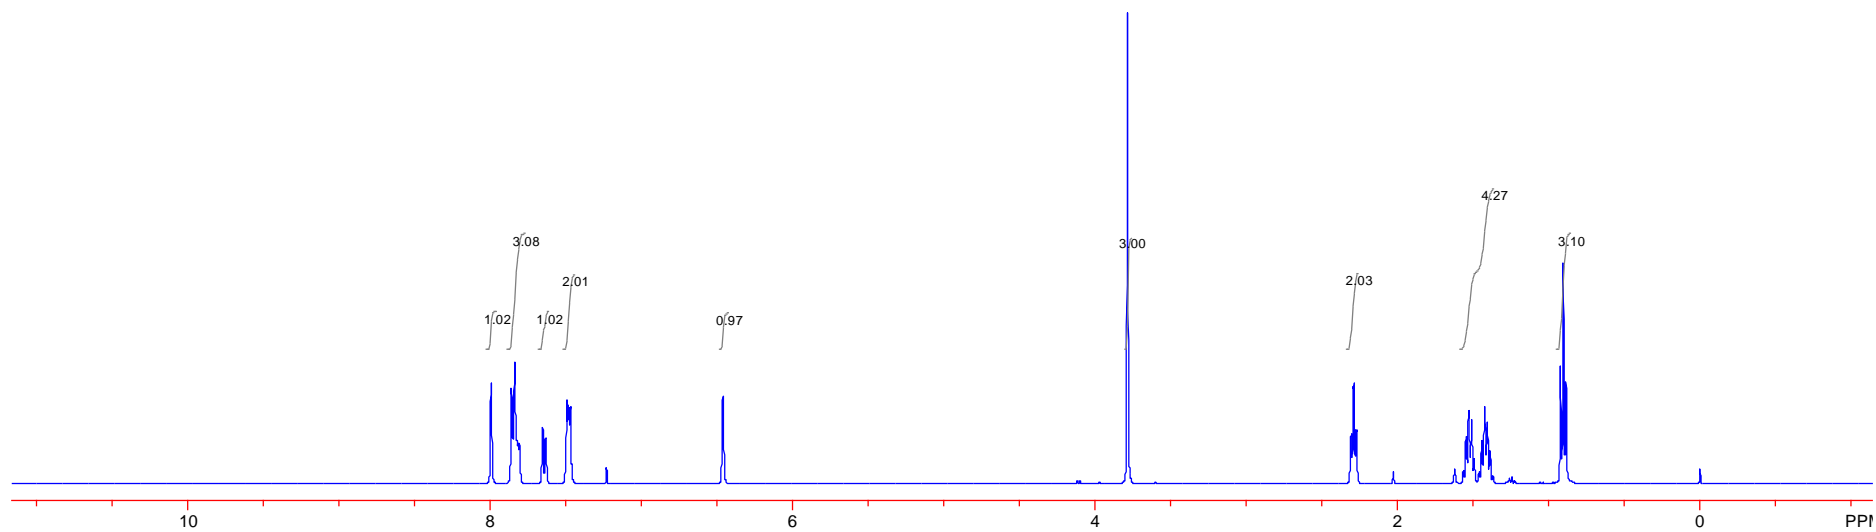

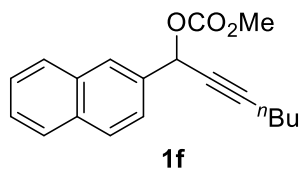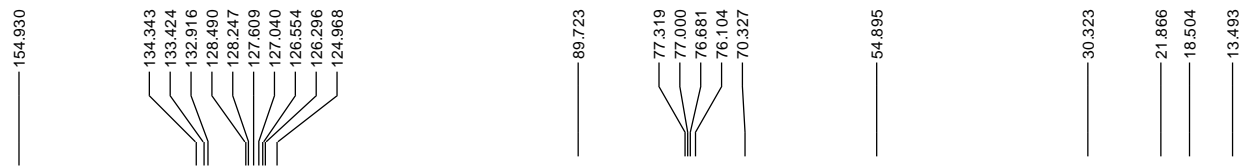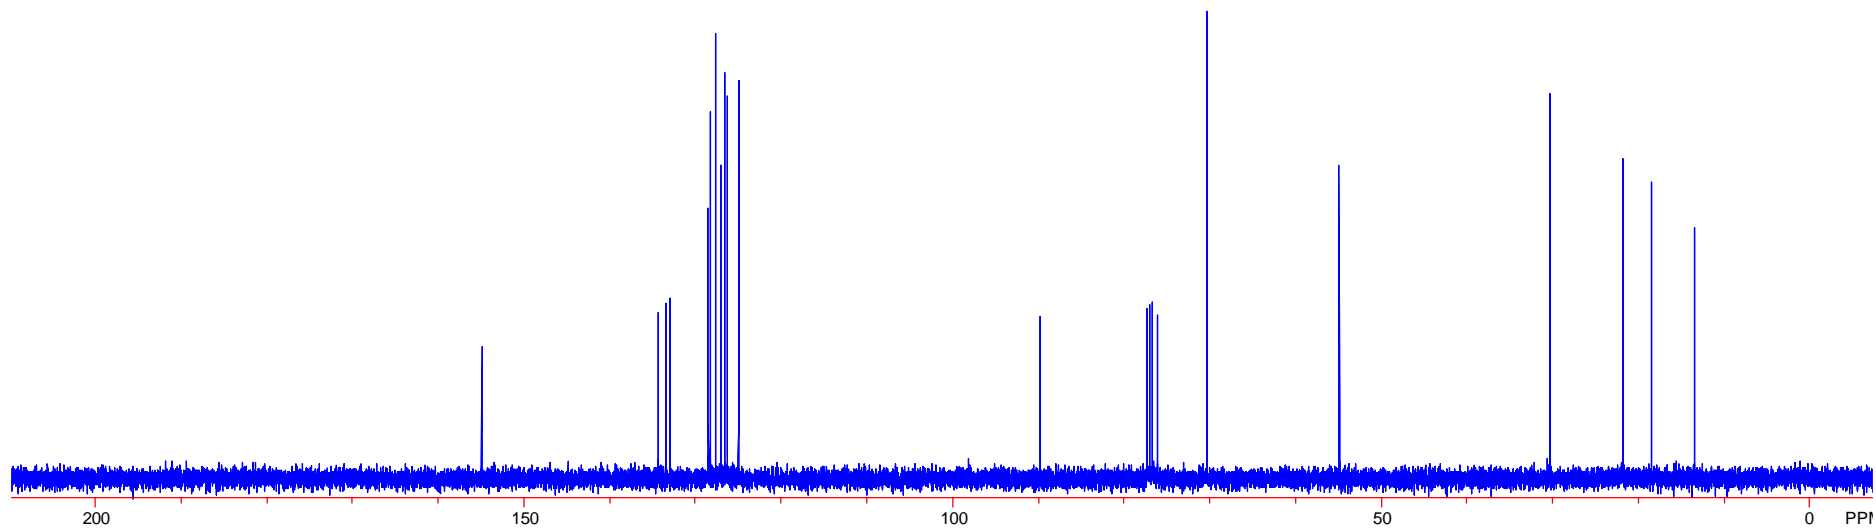

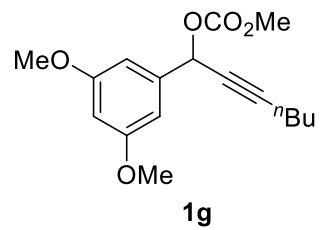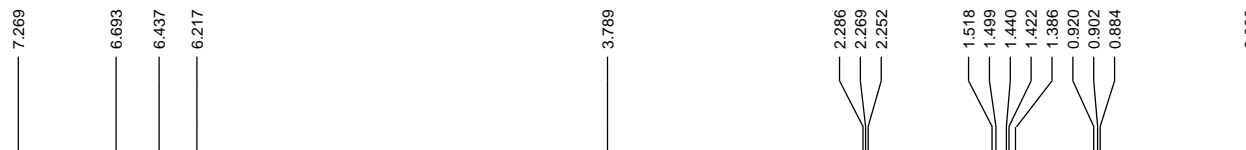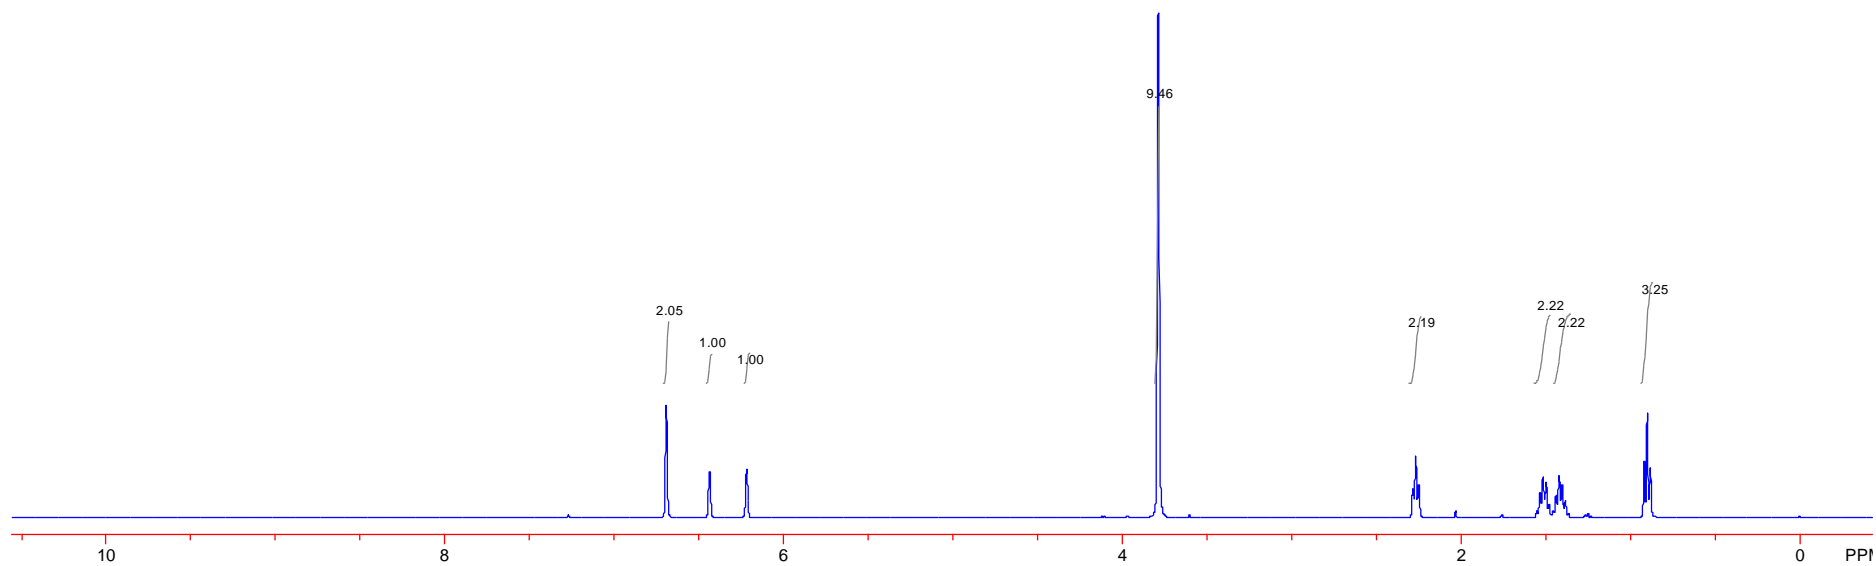

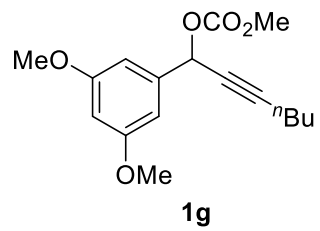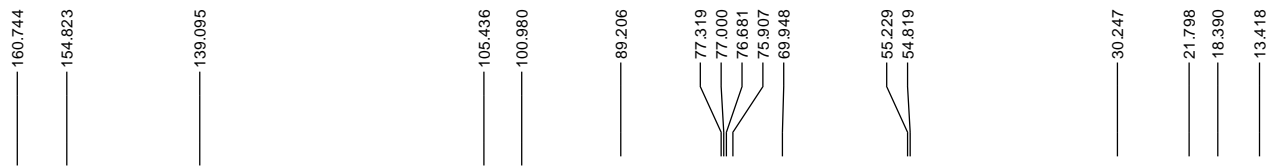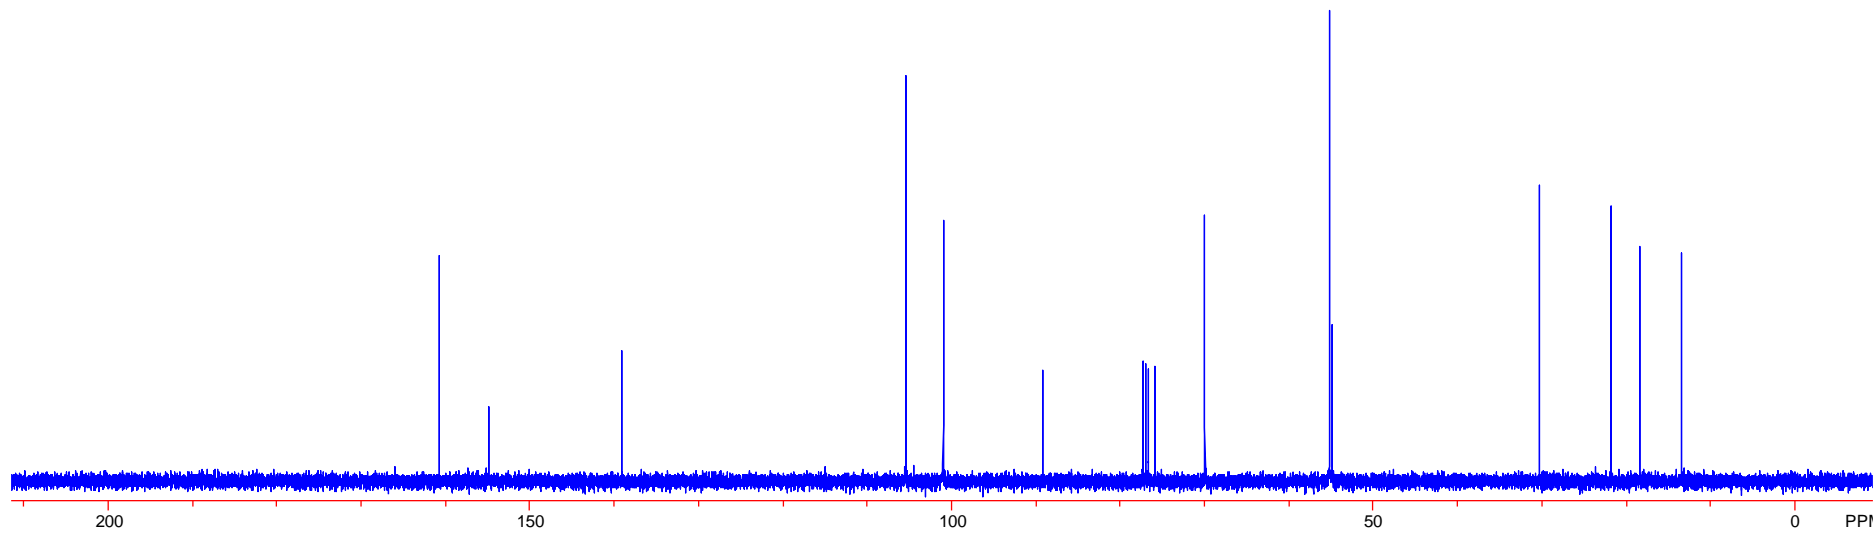

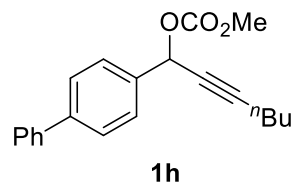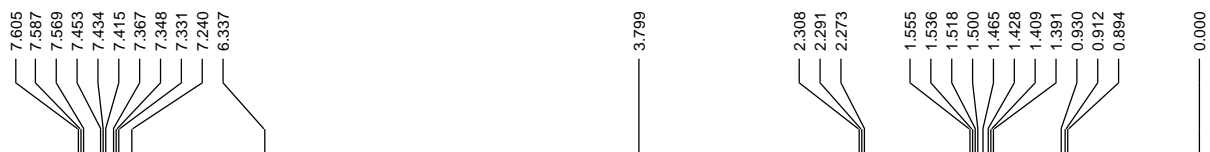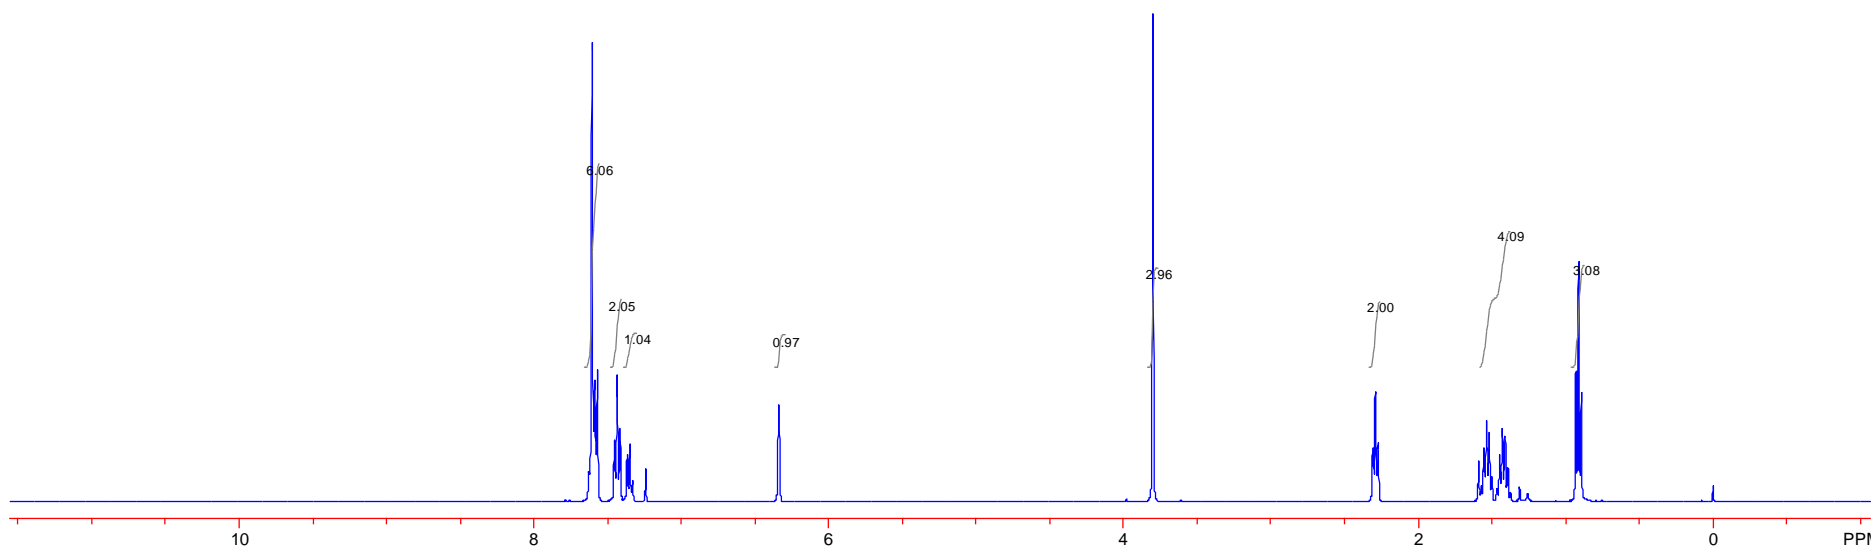

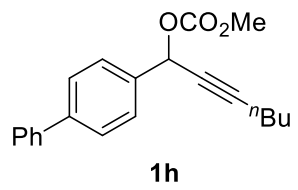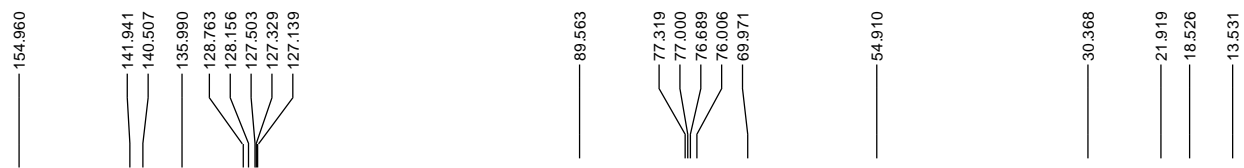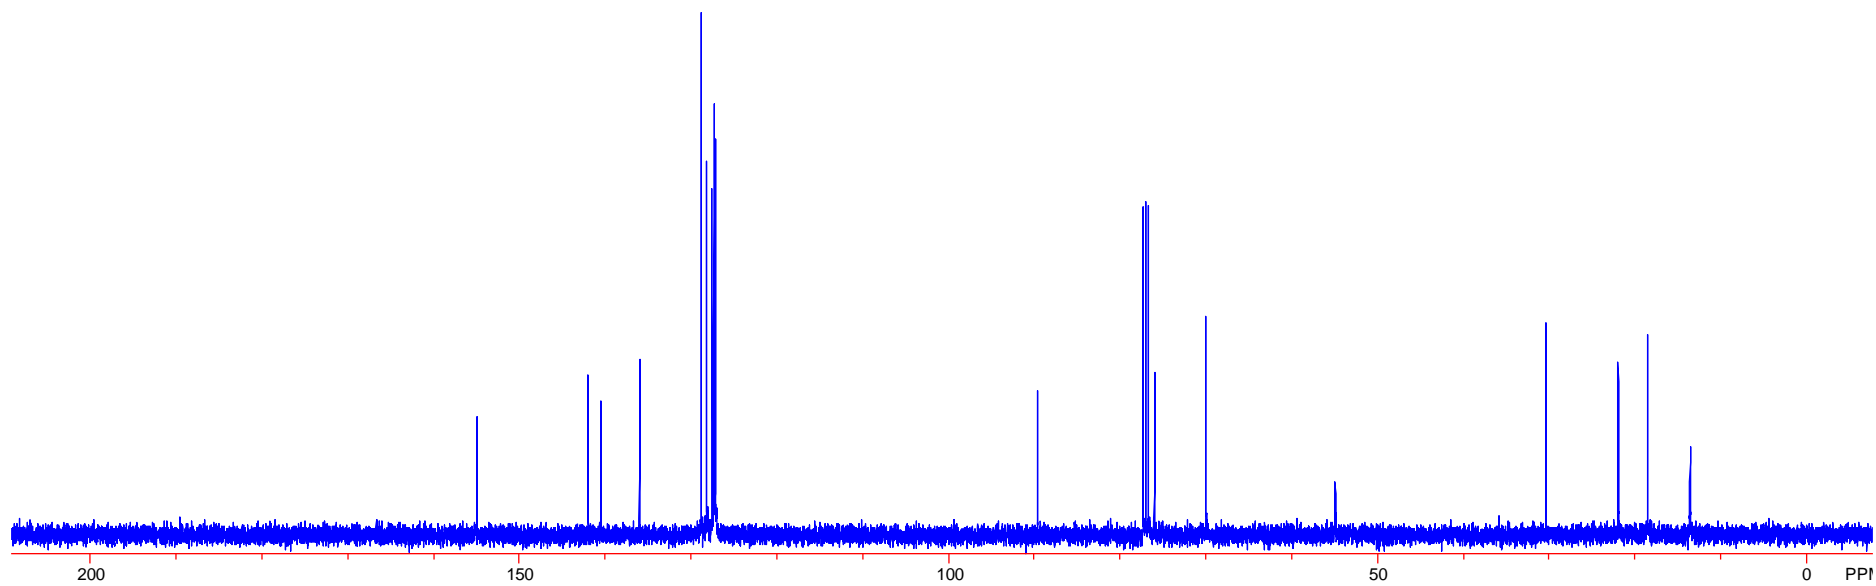

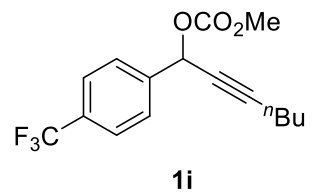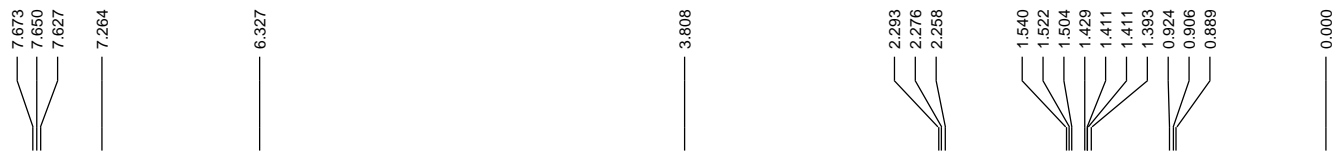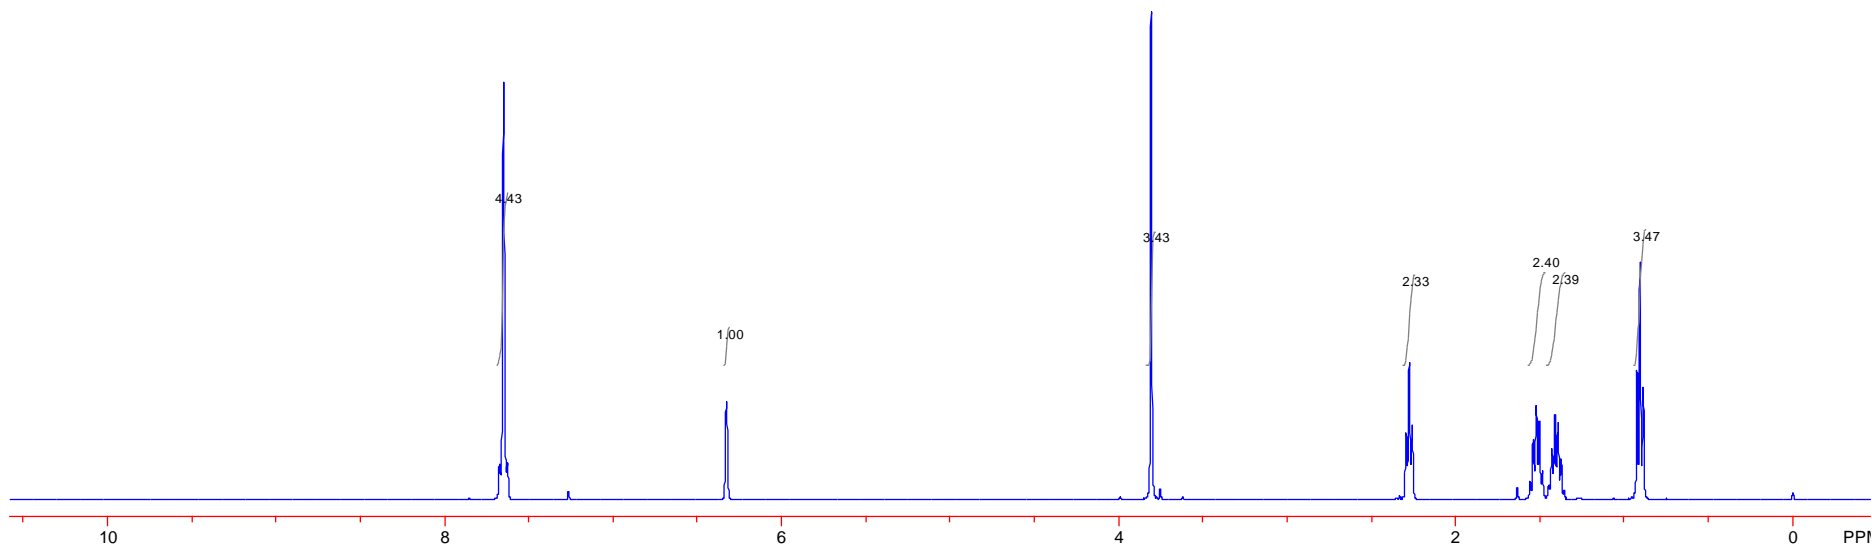

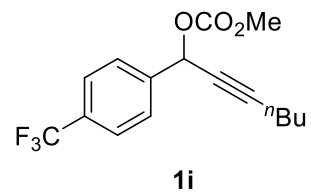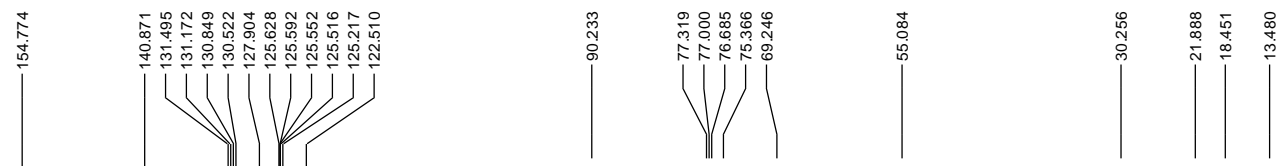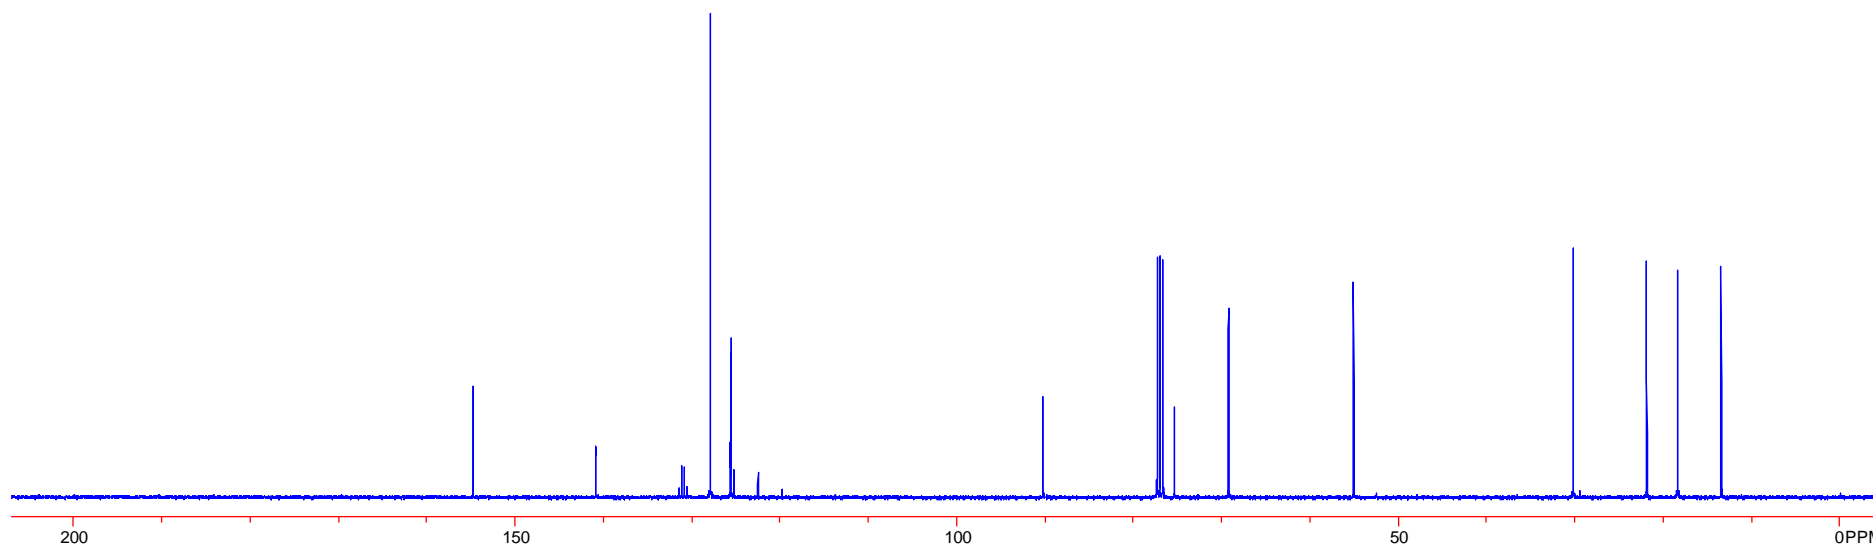



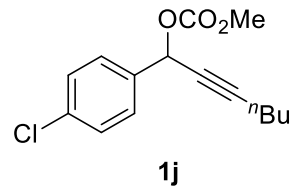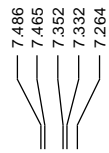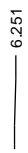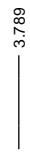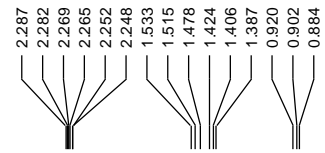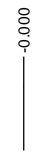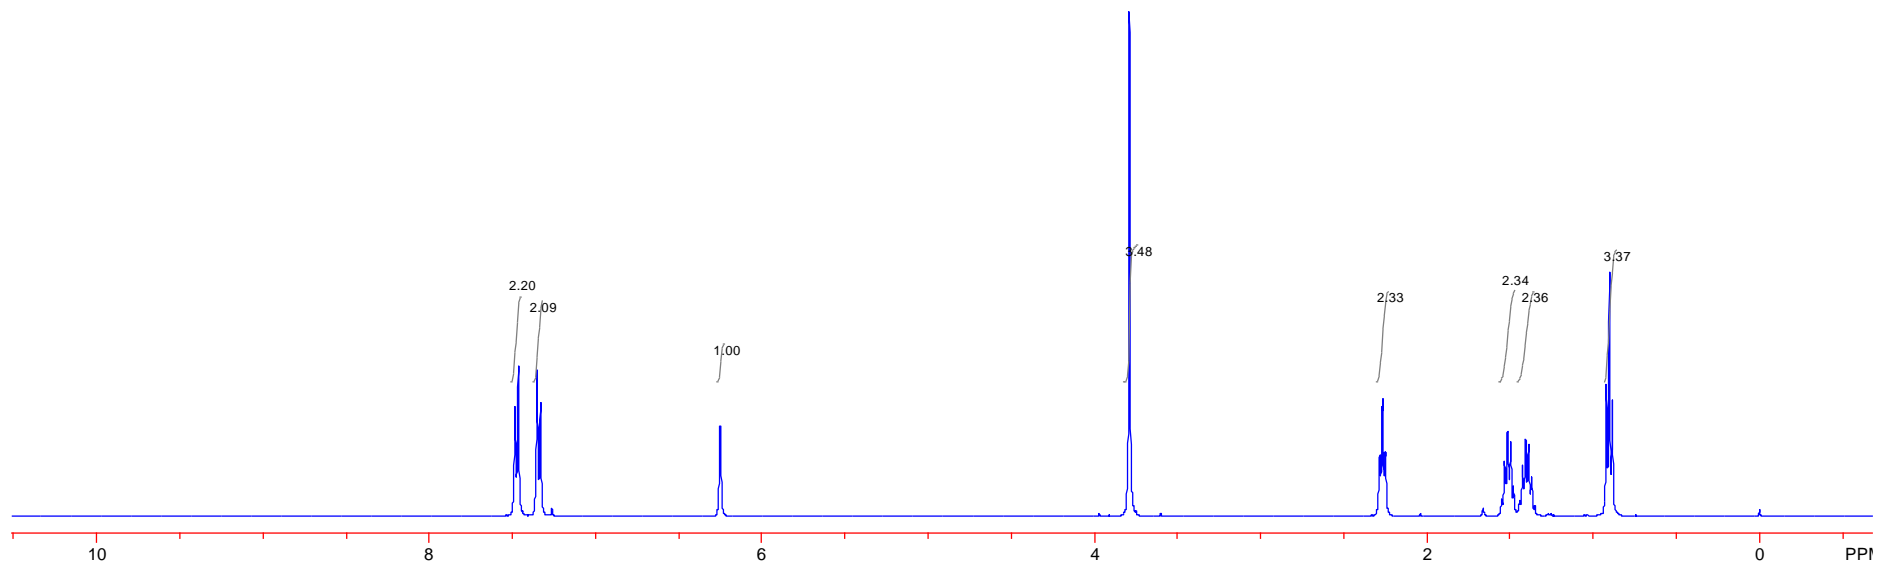

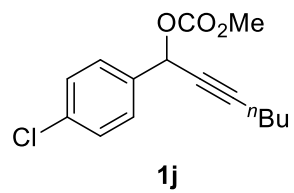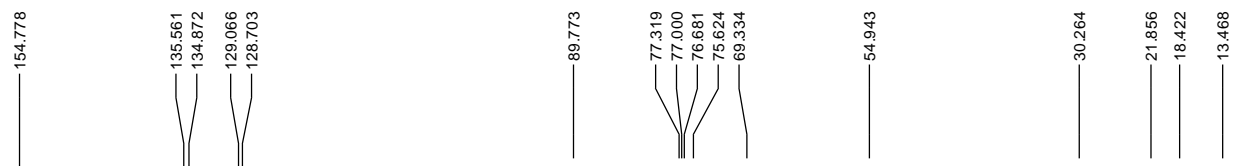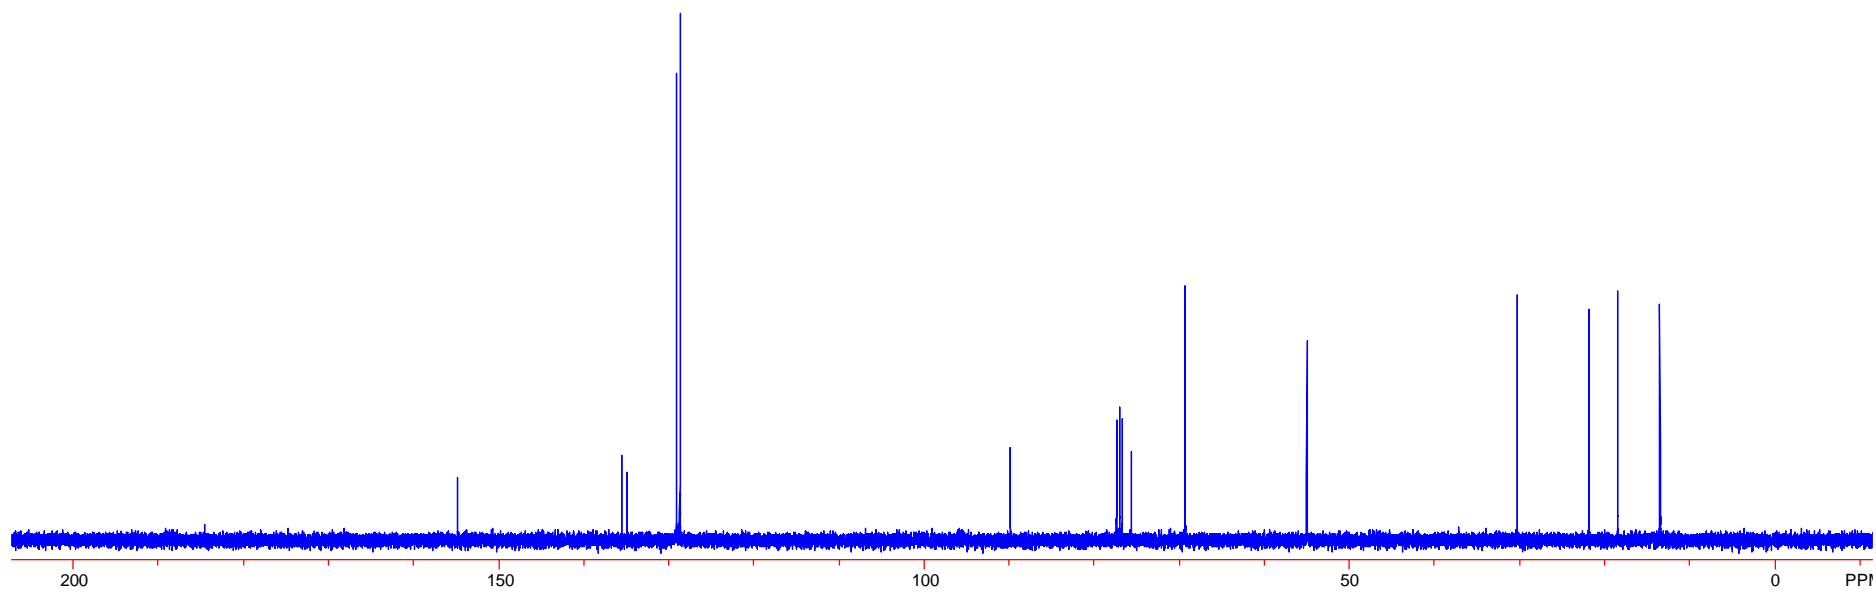

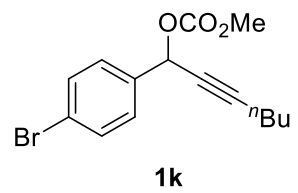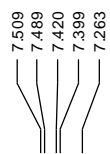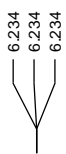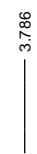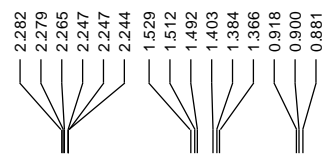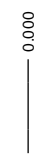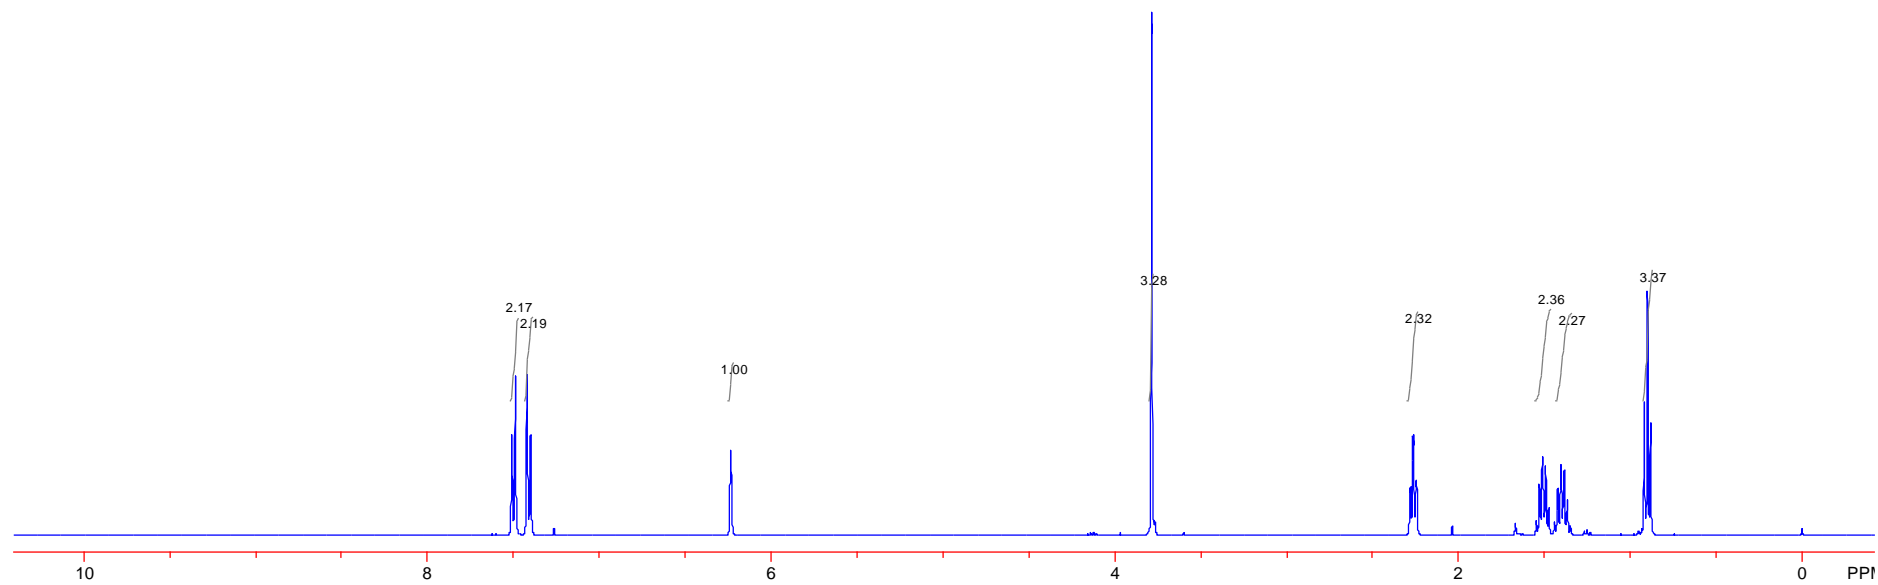

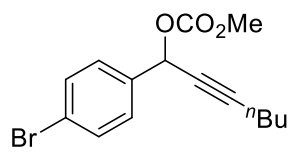

**1k**

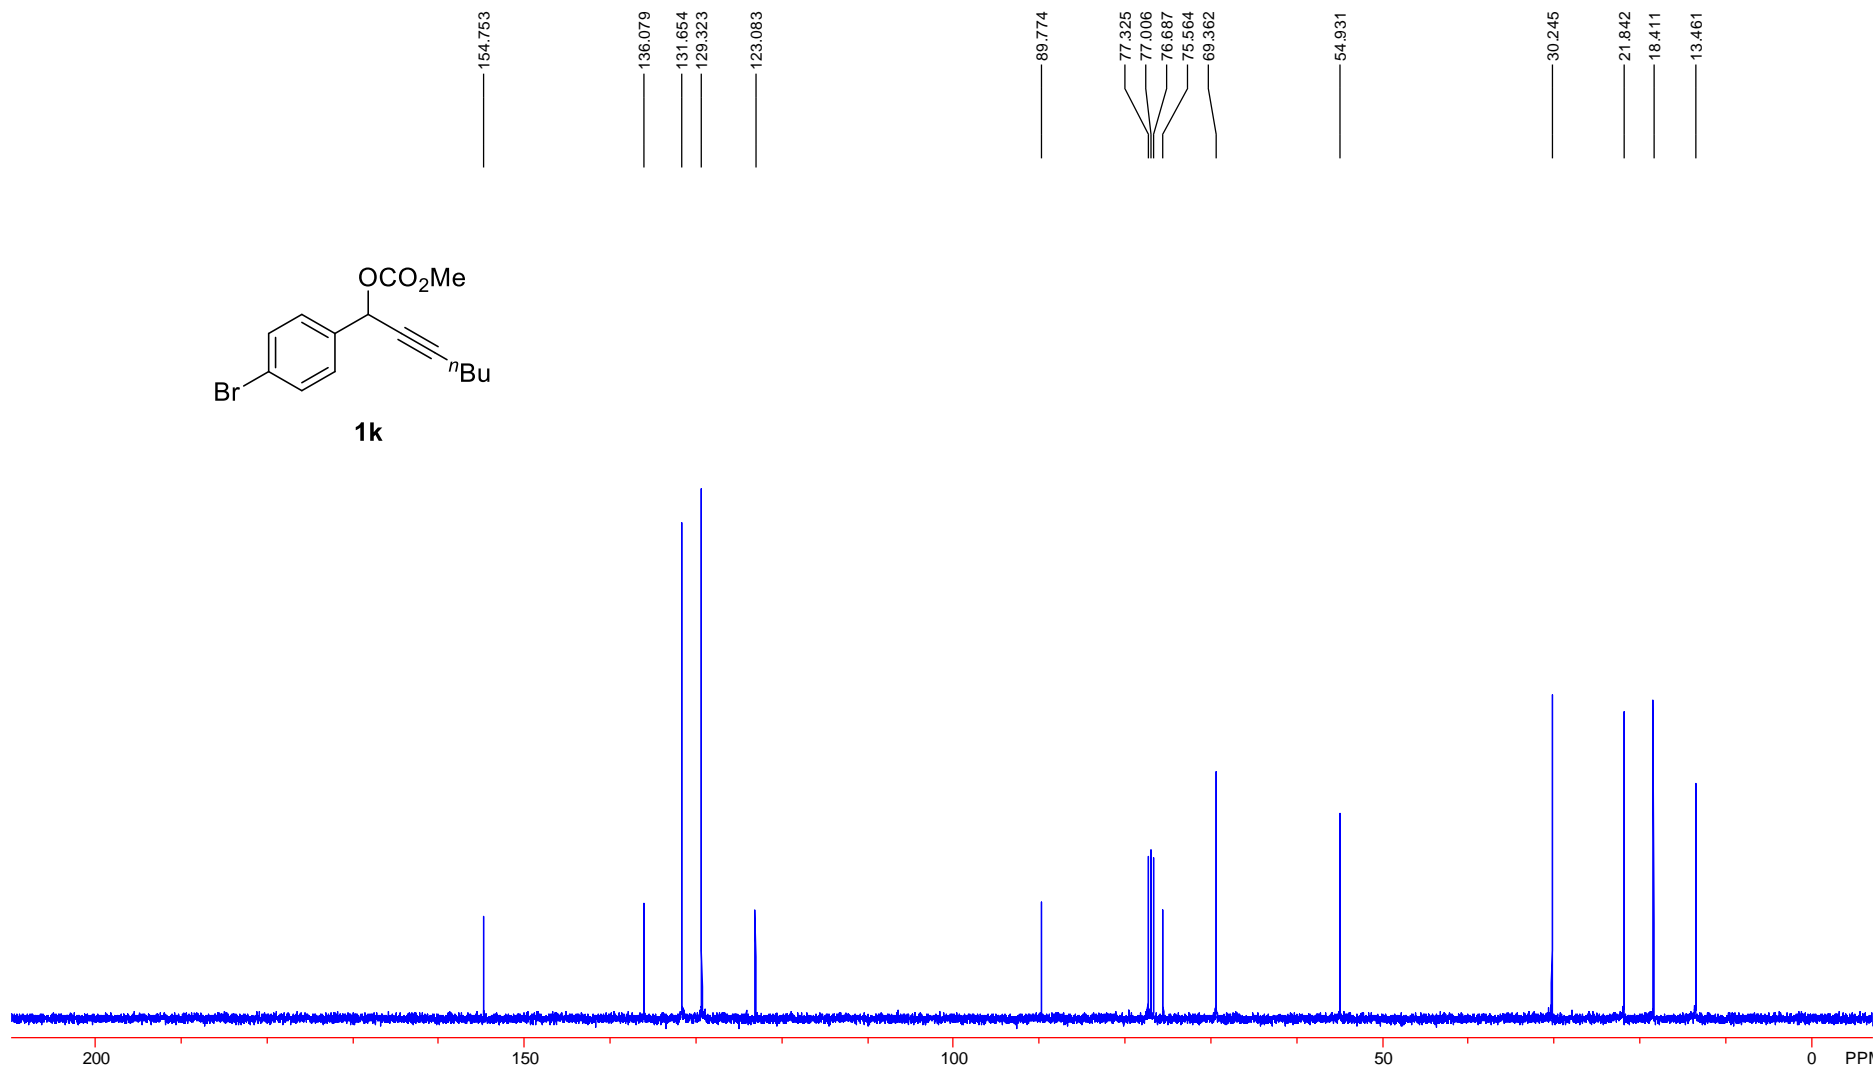

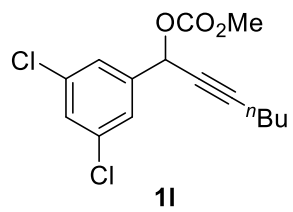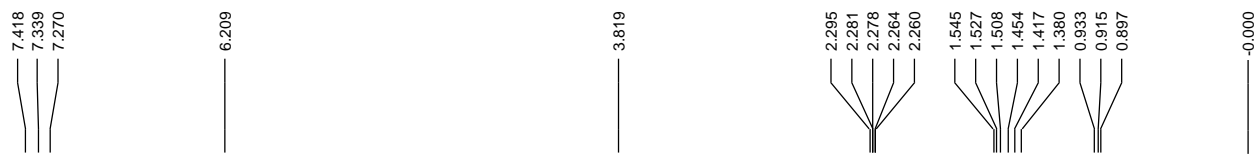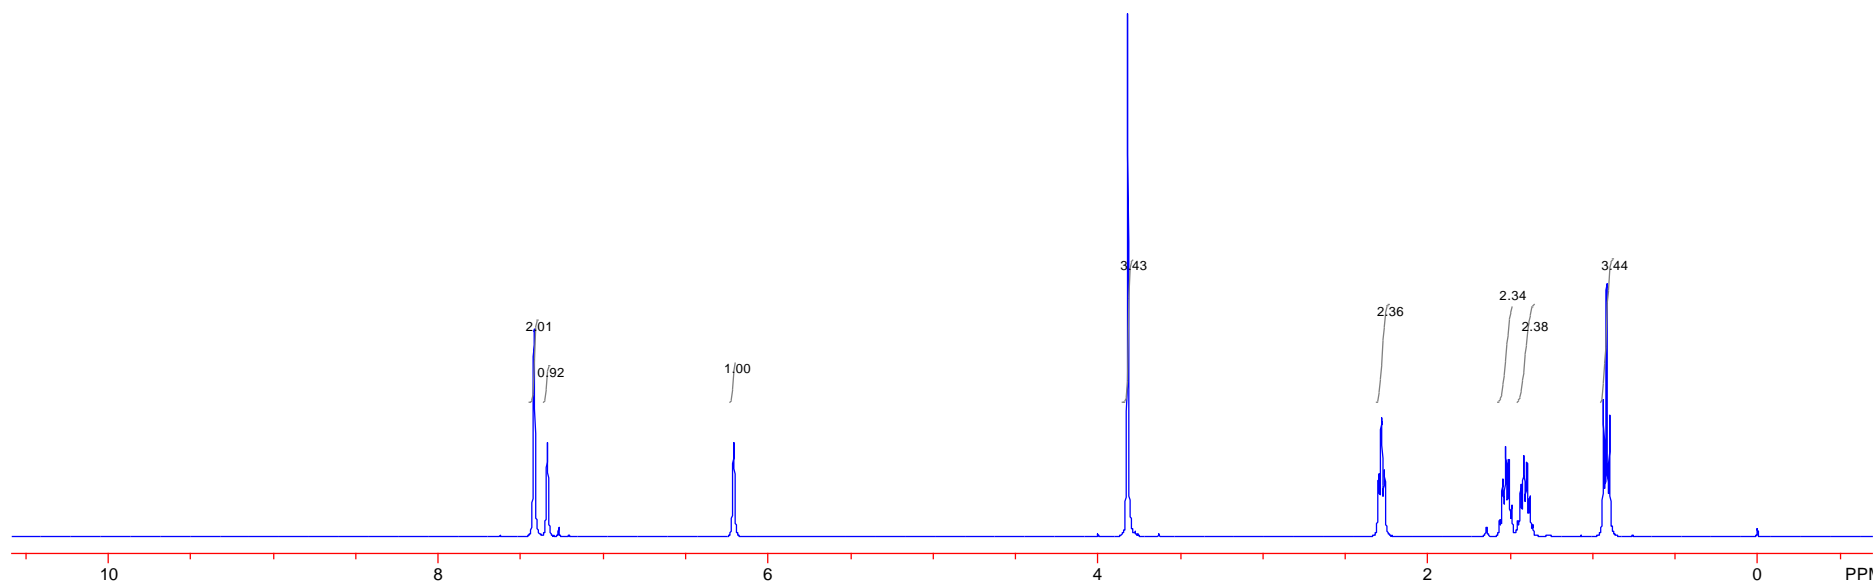

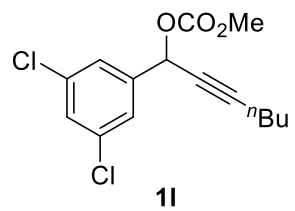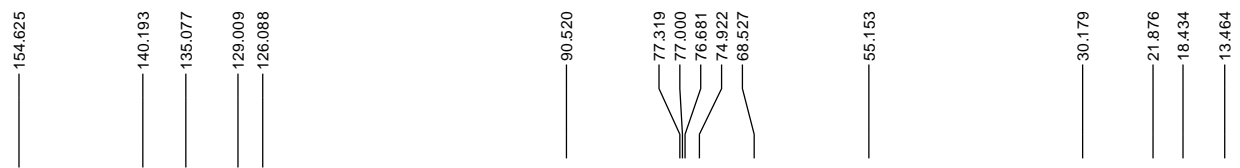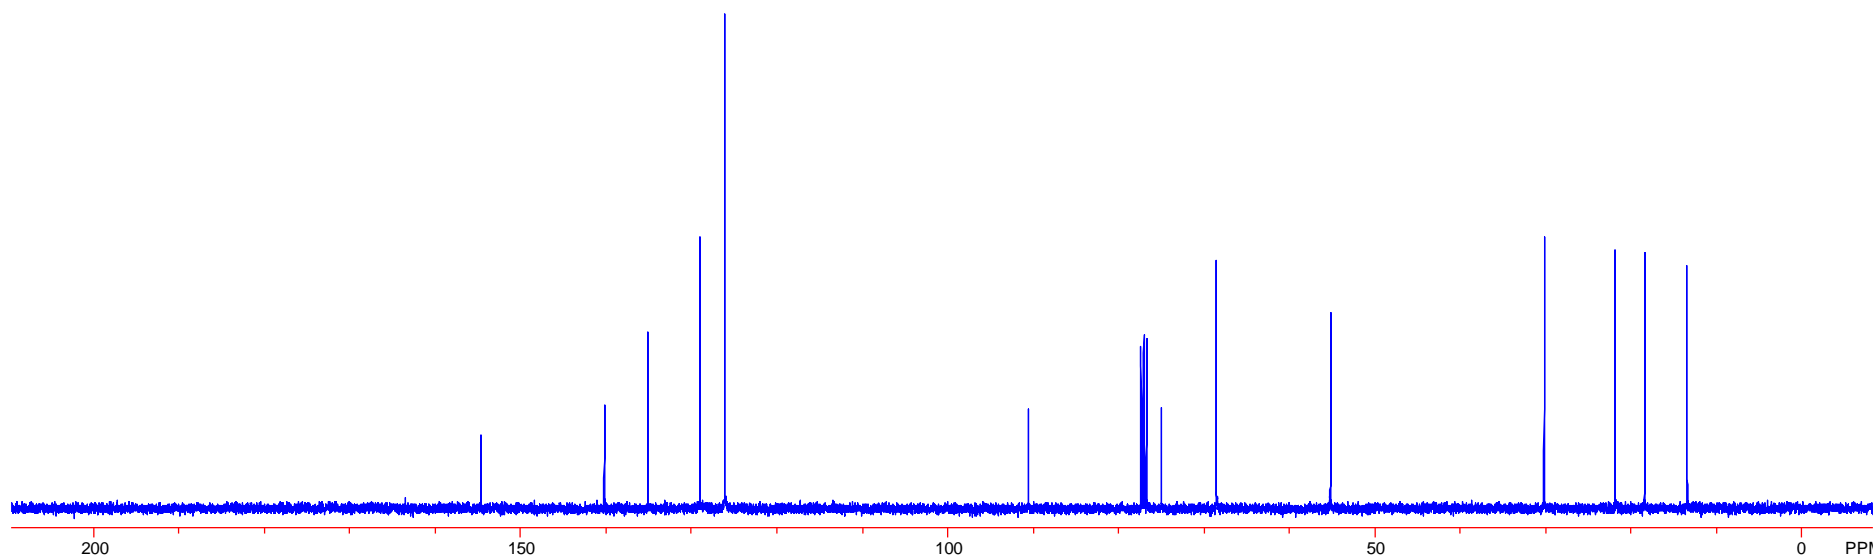

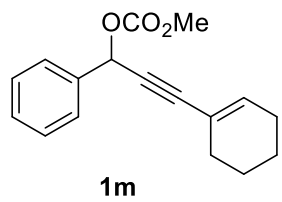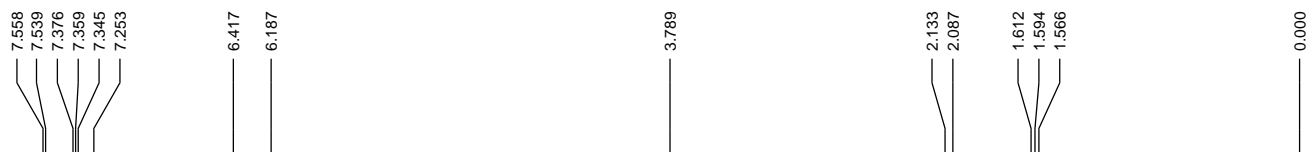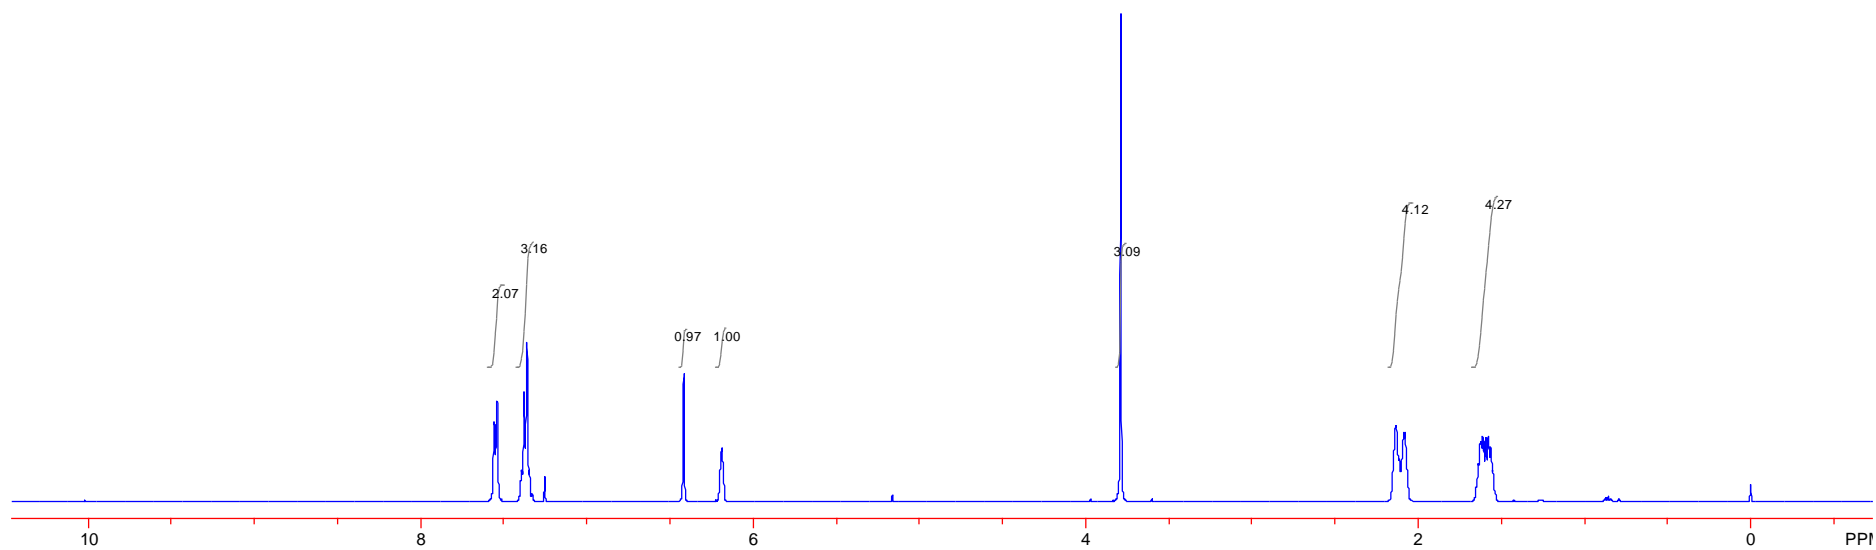

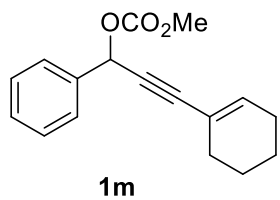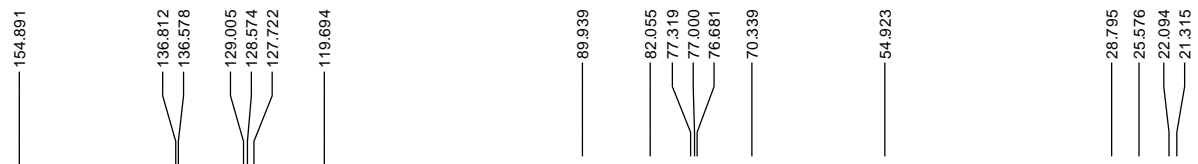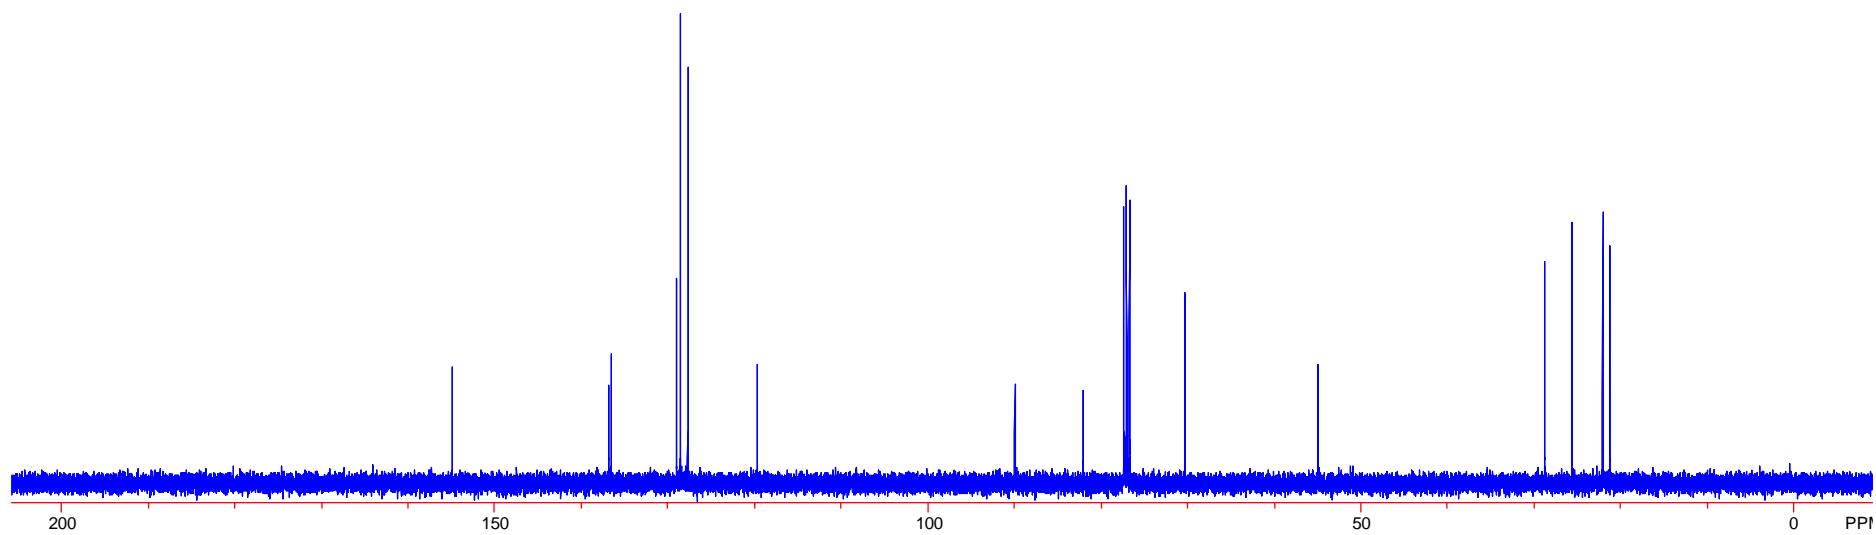



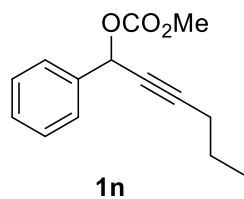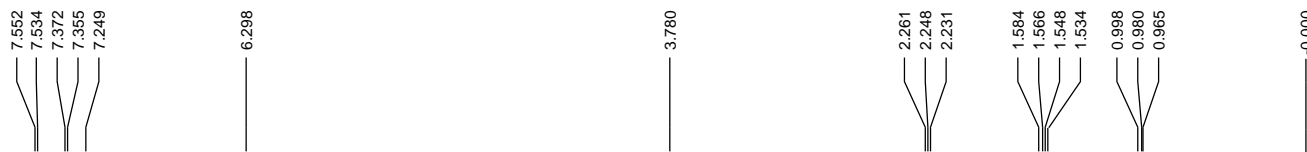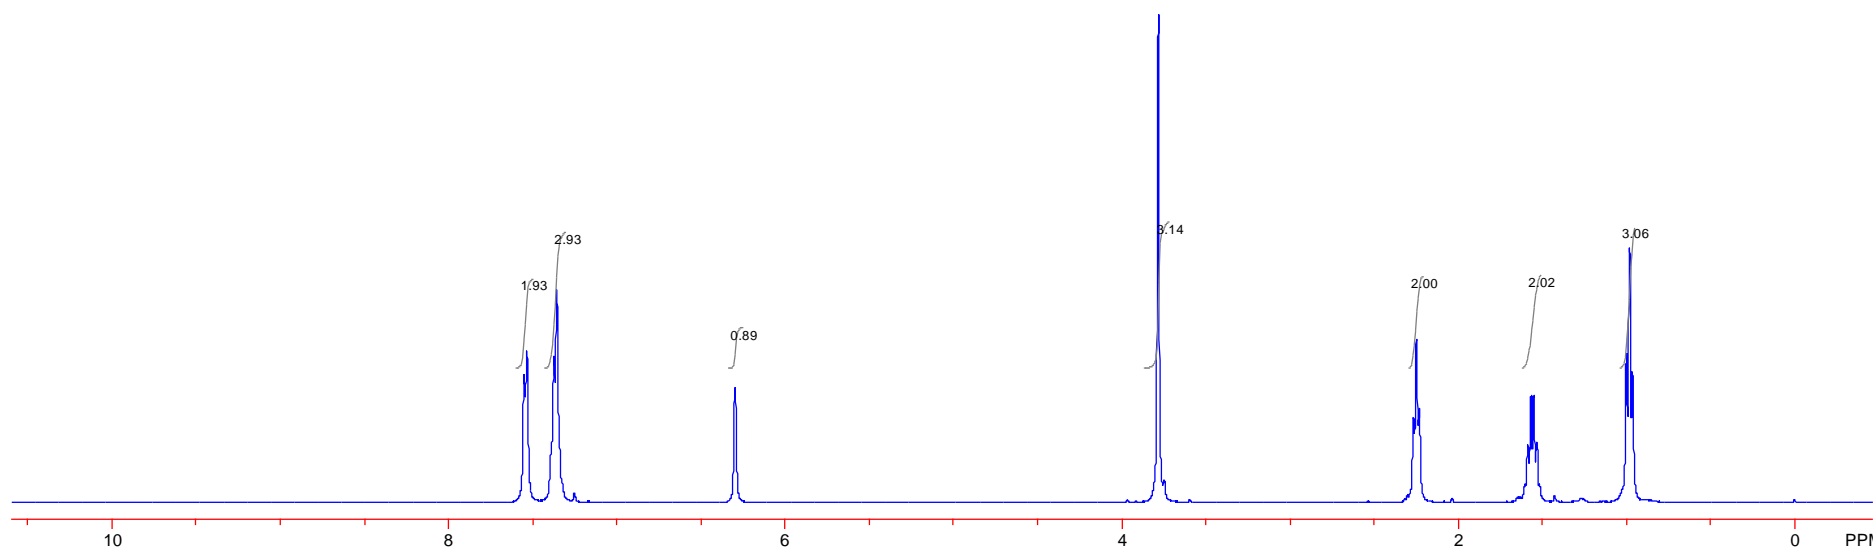

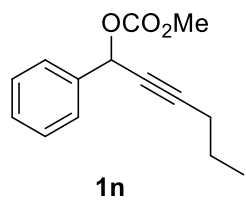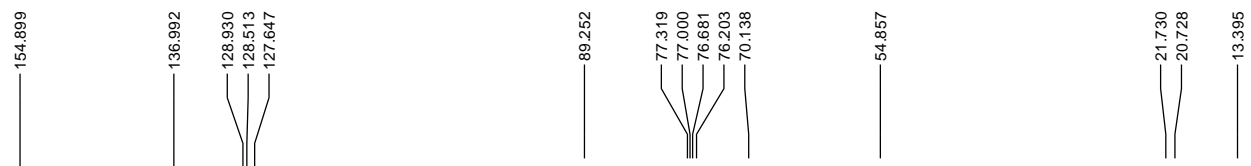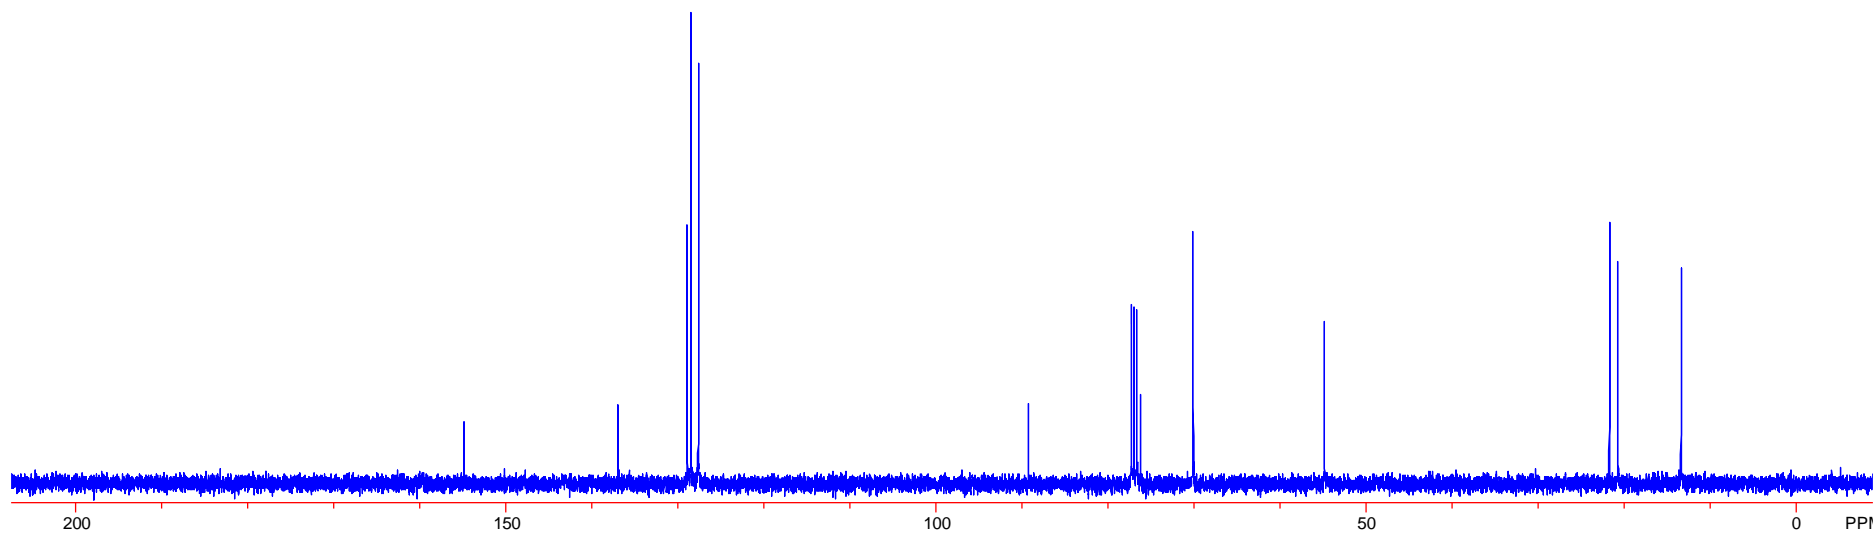

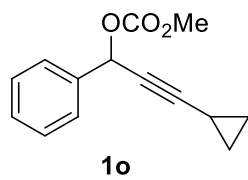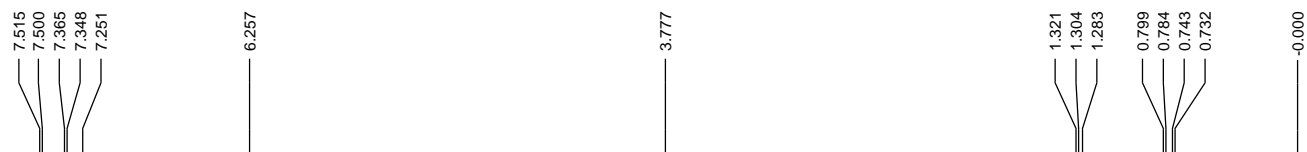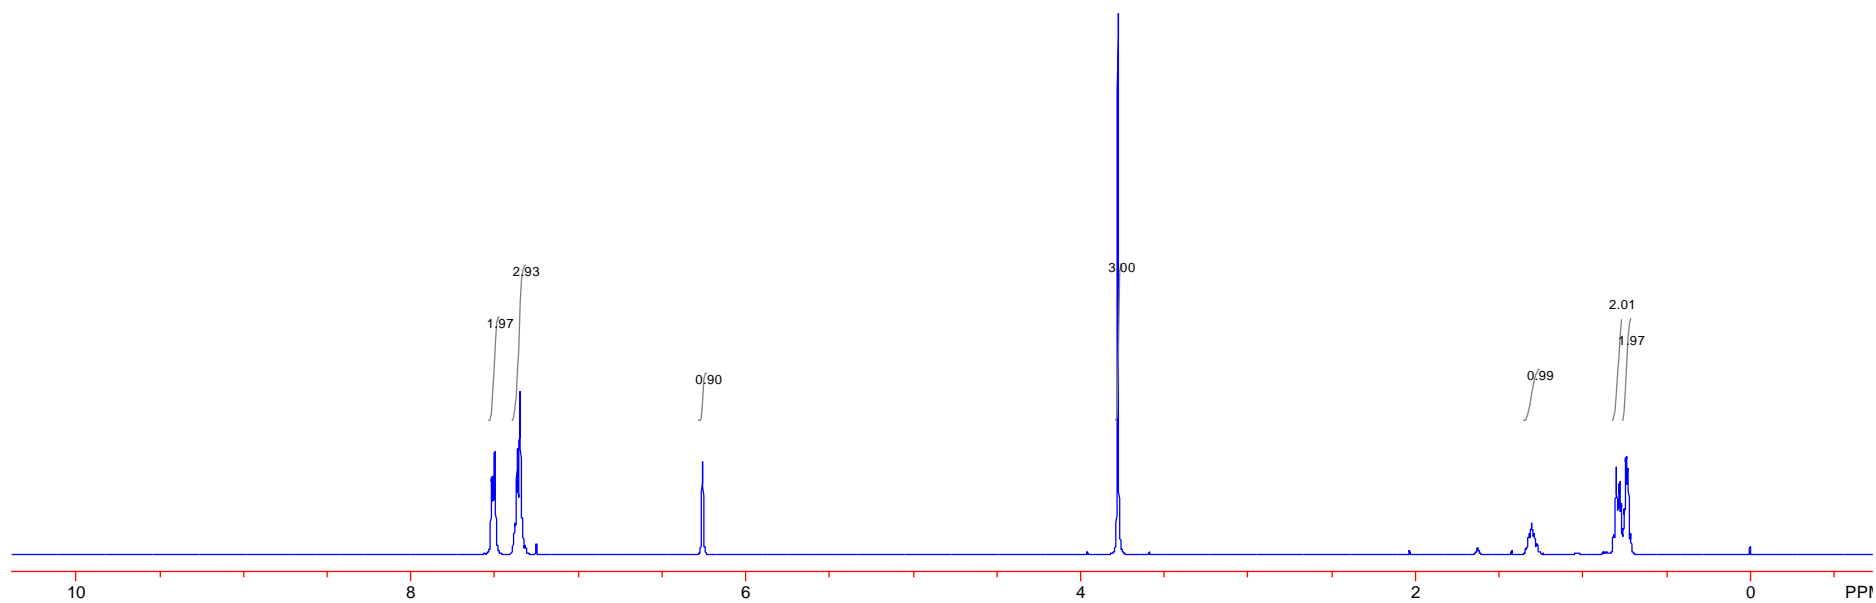

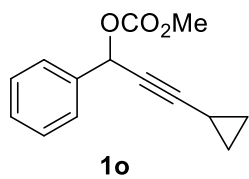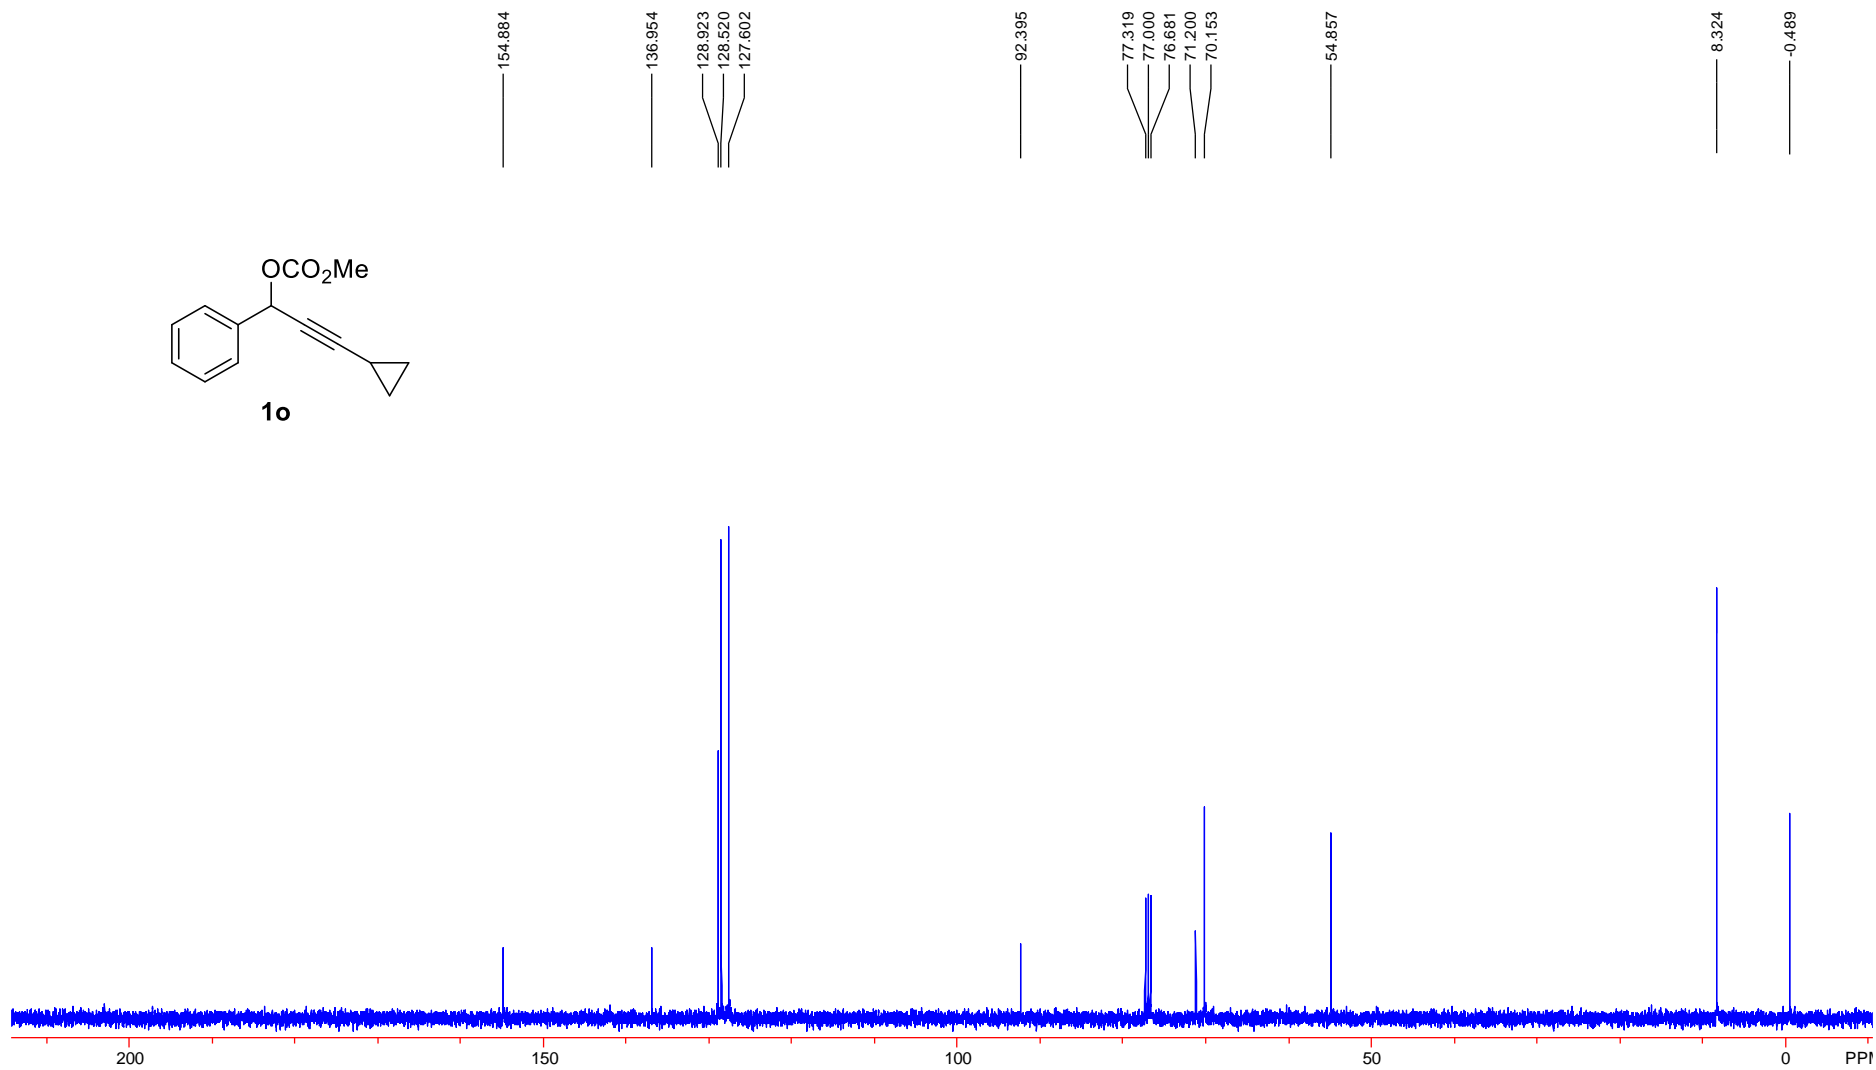

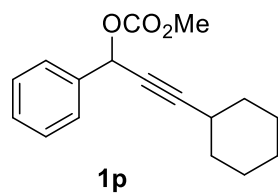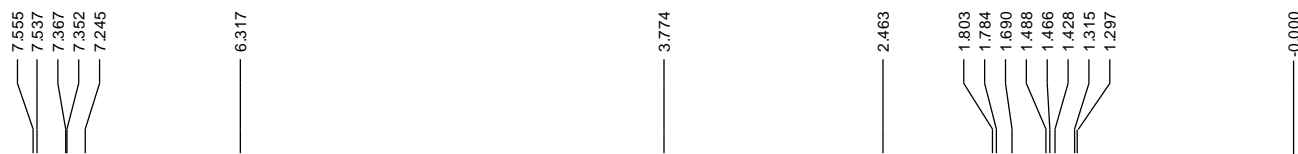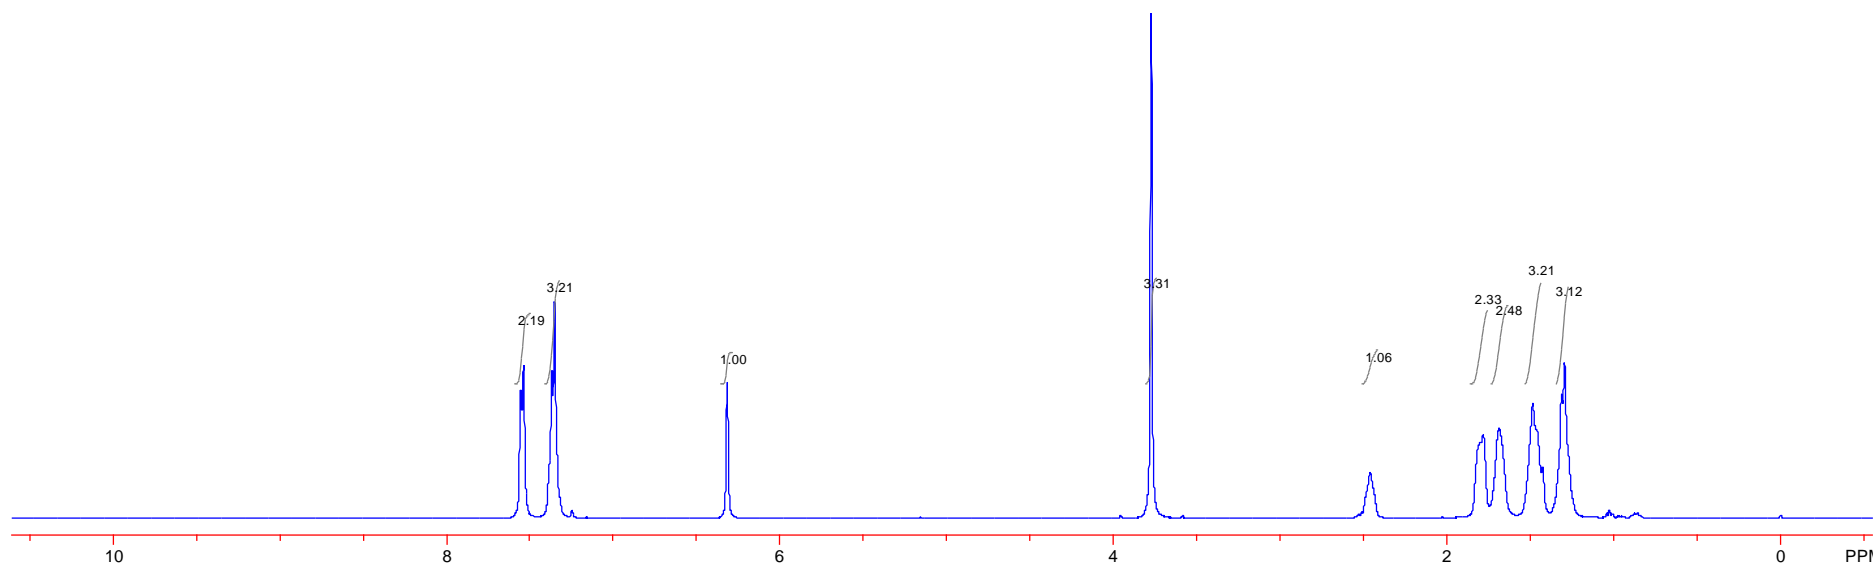

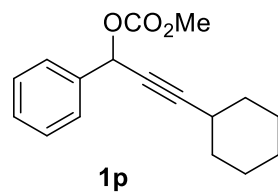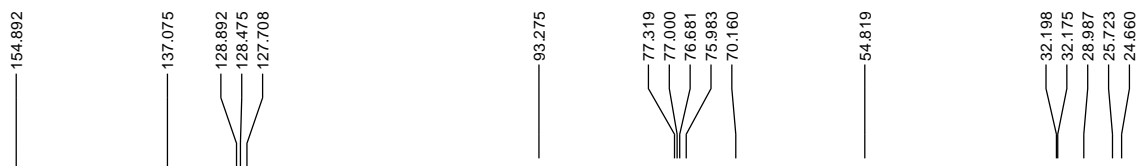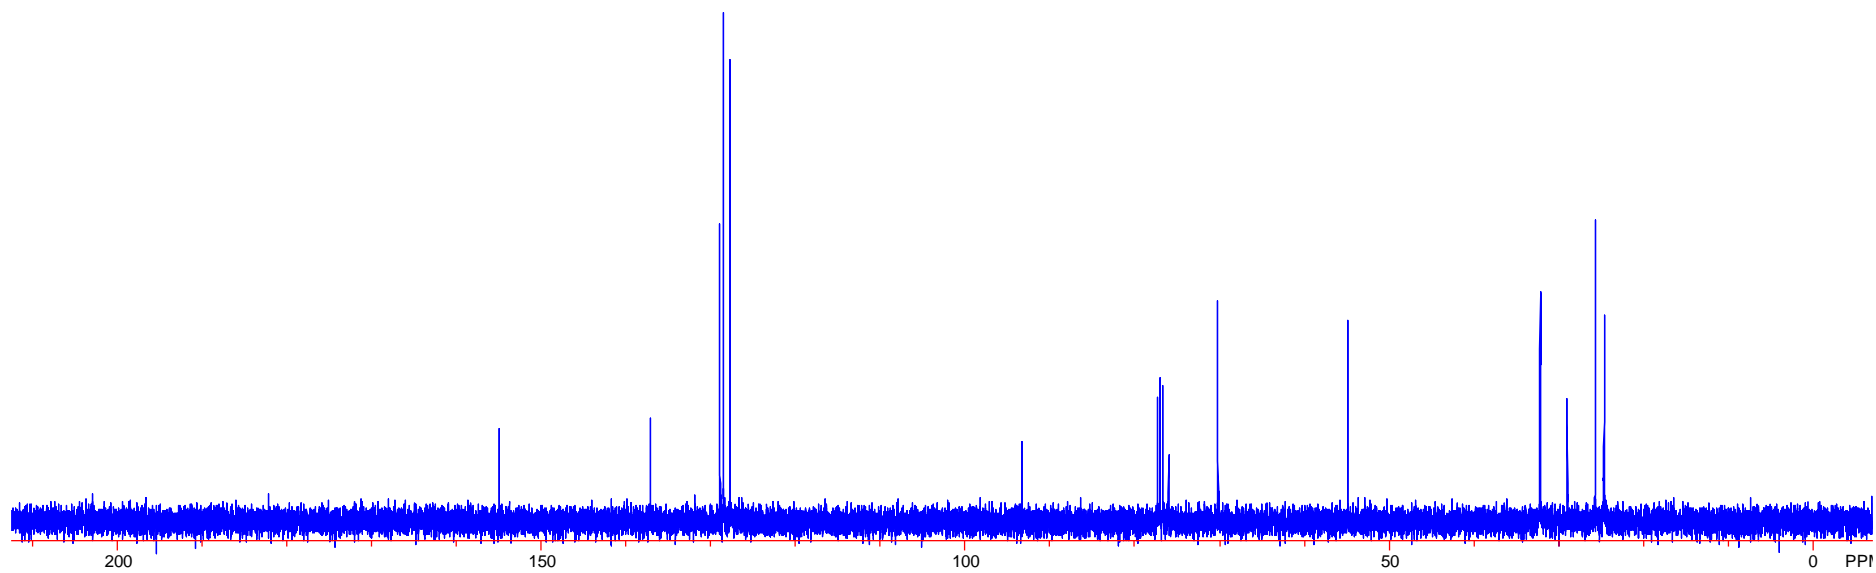

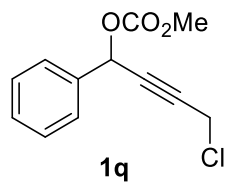

7.523  
7.511  
7.388  
7.375  
7.246

6.330

4.184

3.787

-0.000

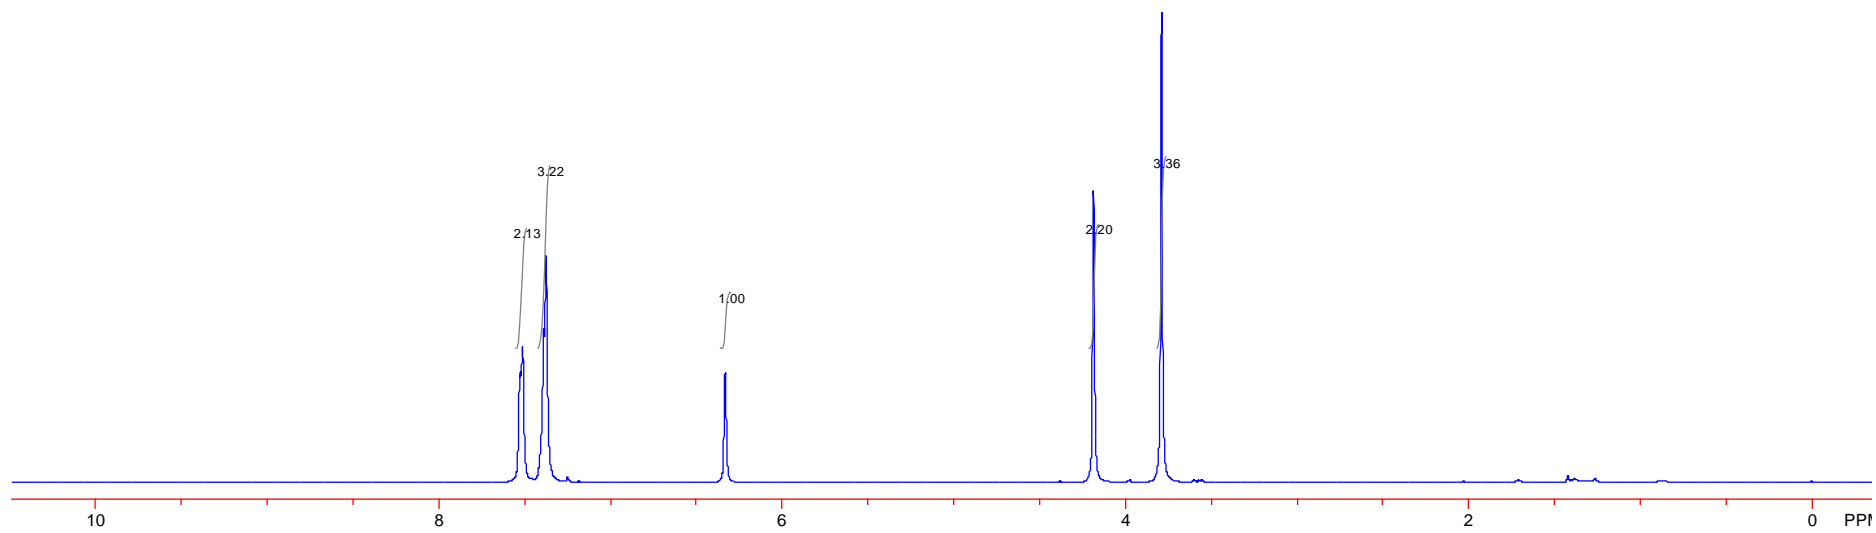

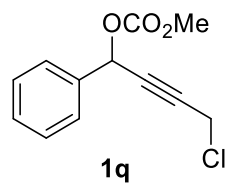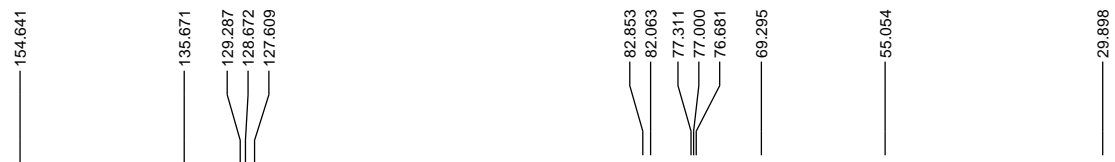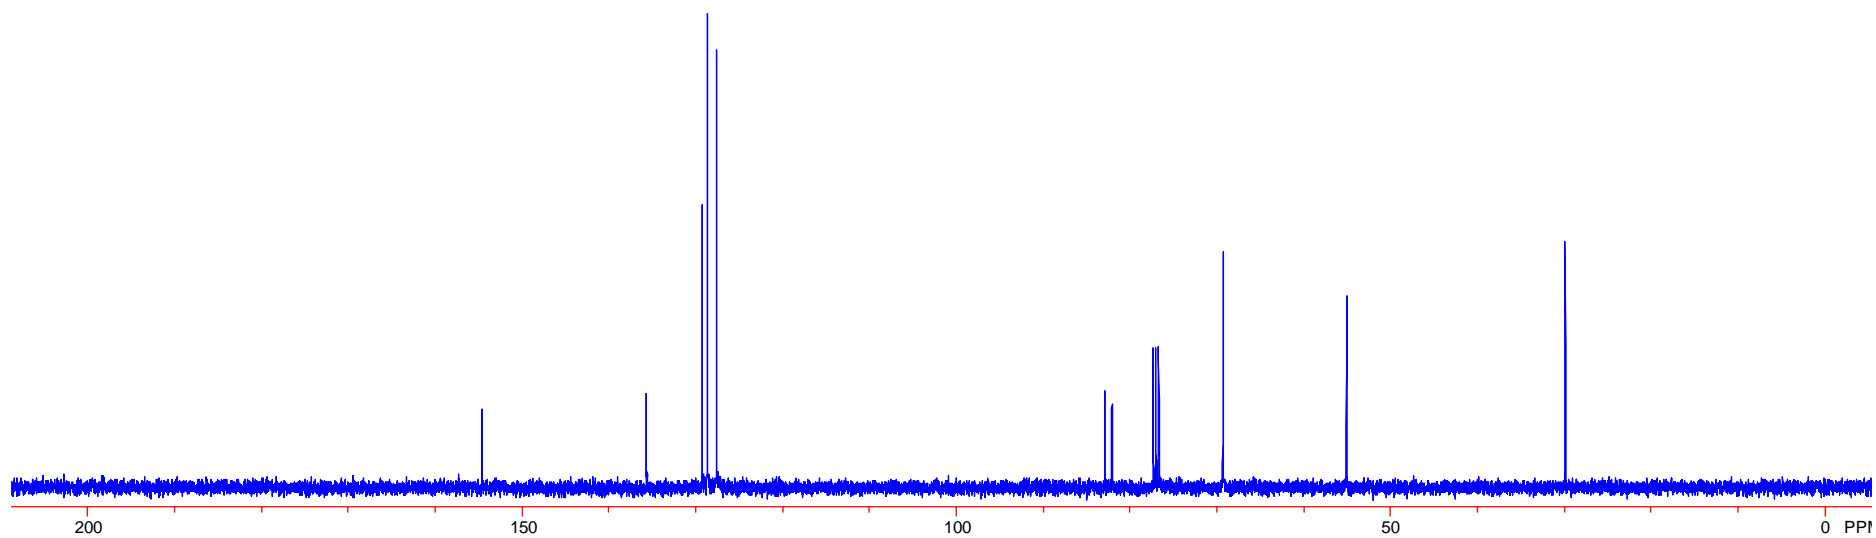



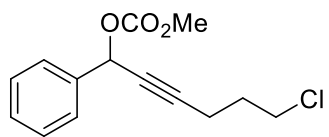

**1r**

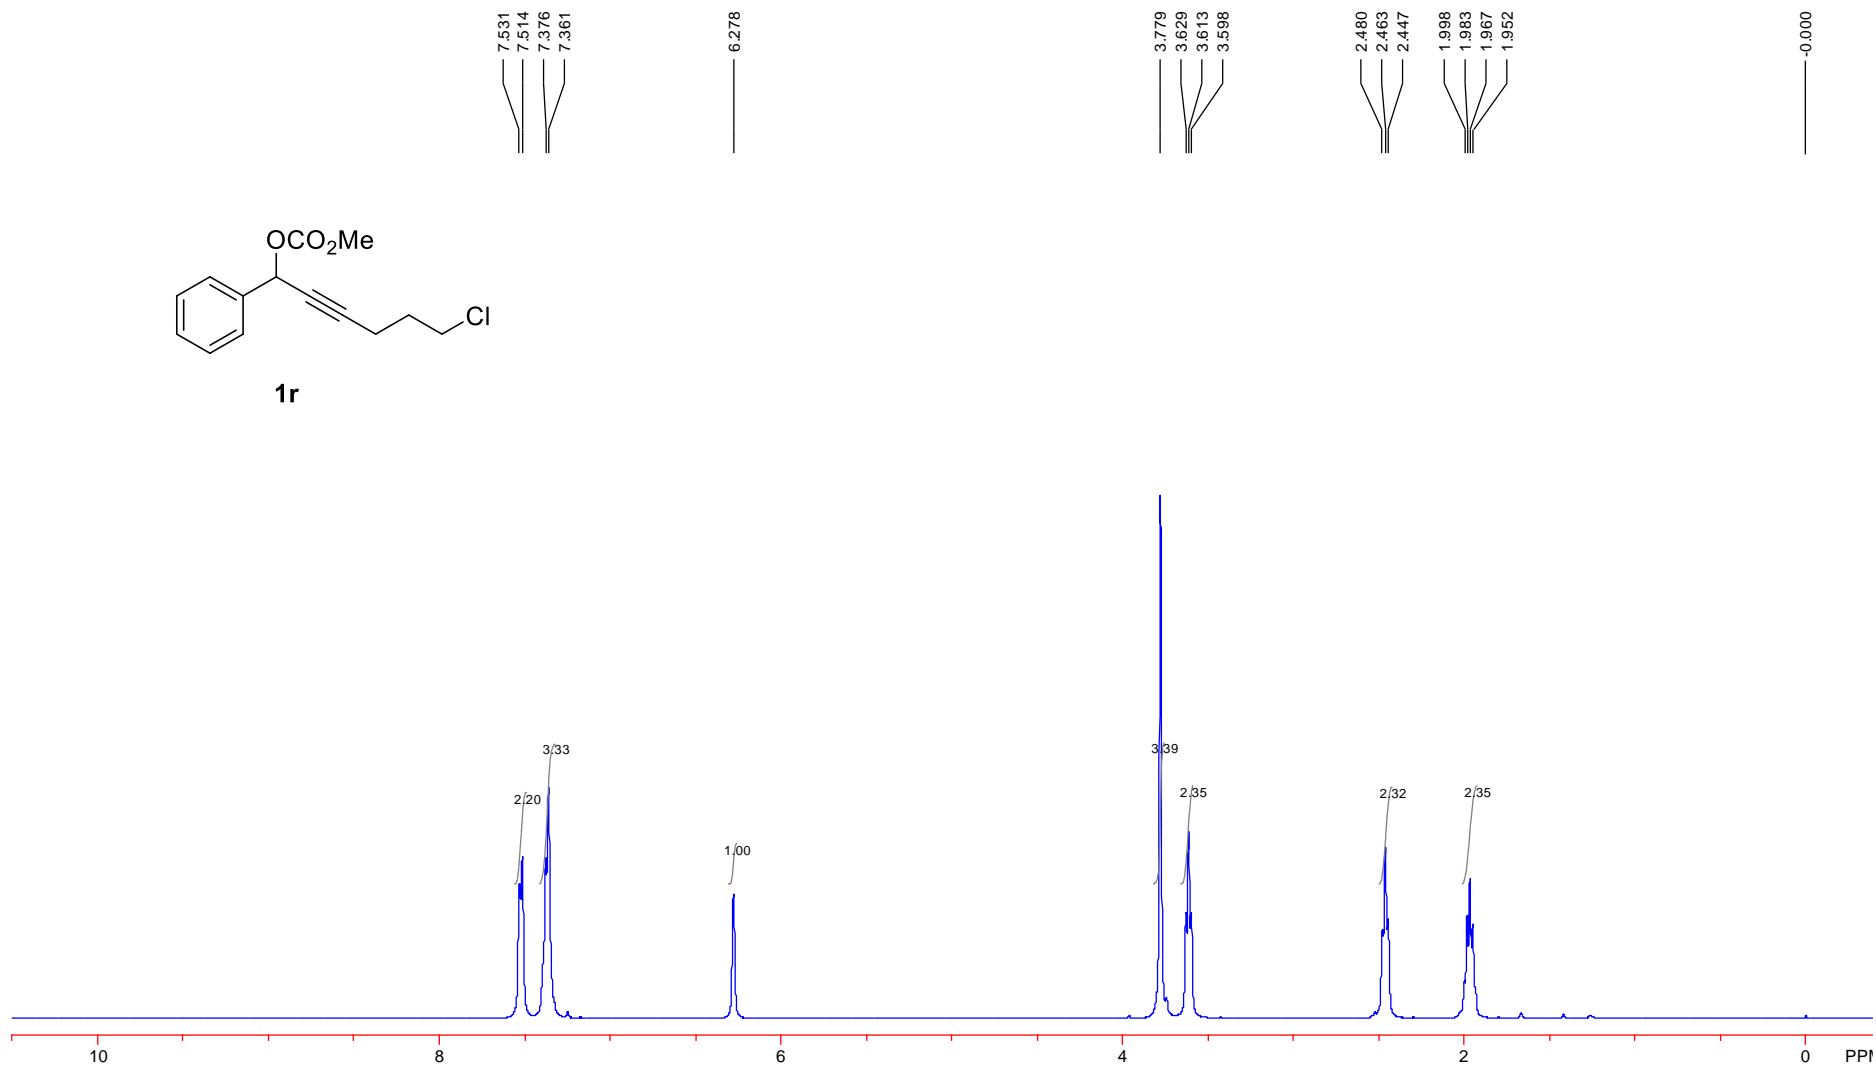

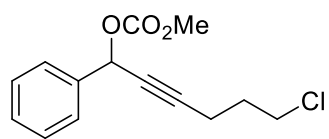

**1r**

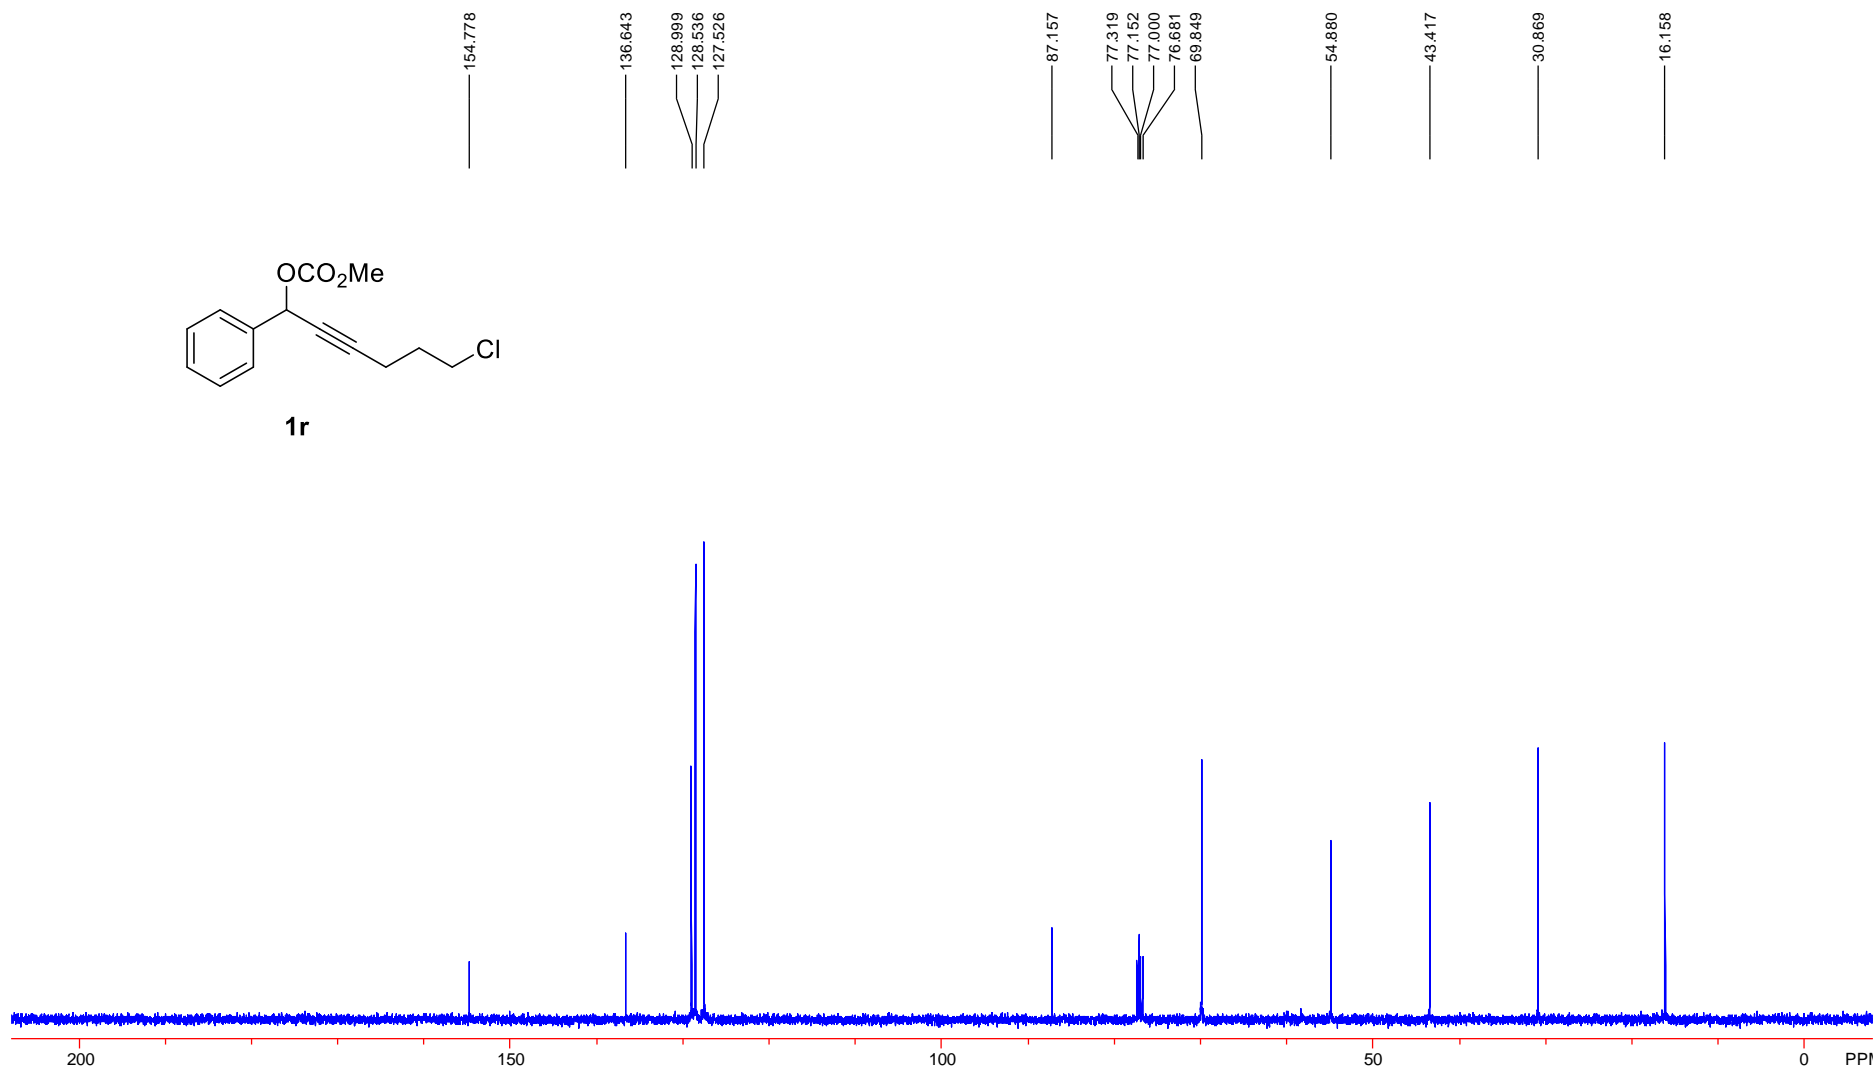

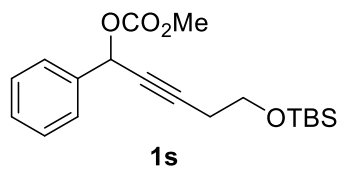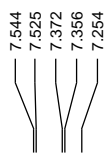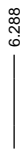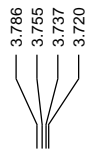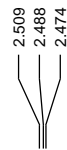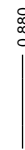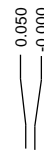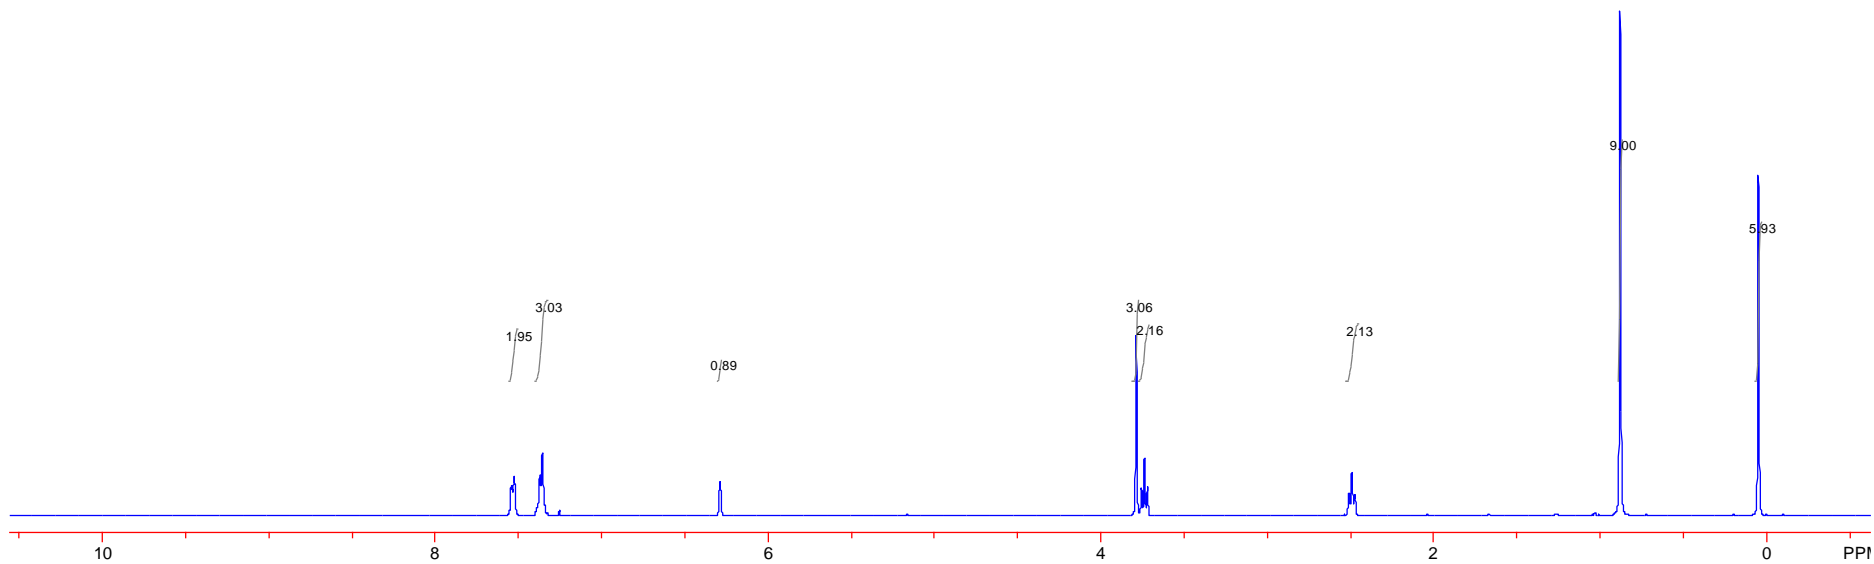

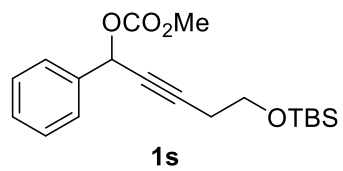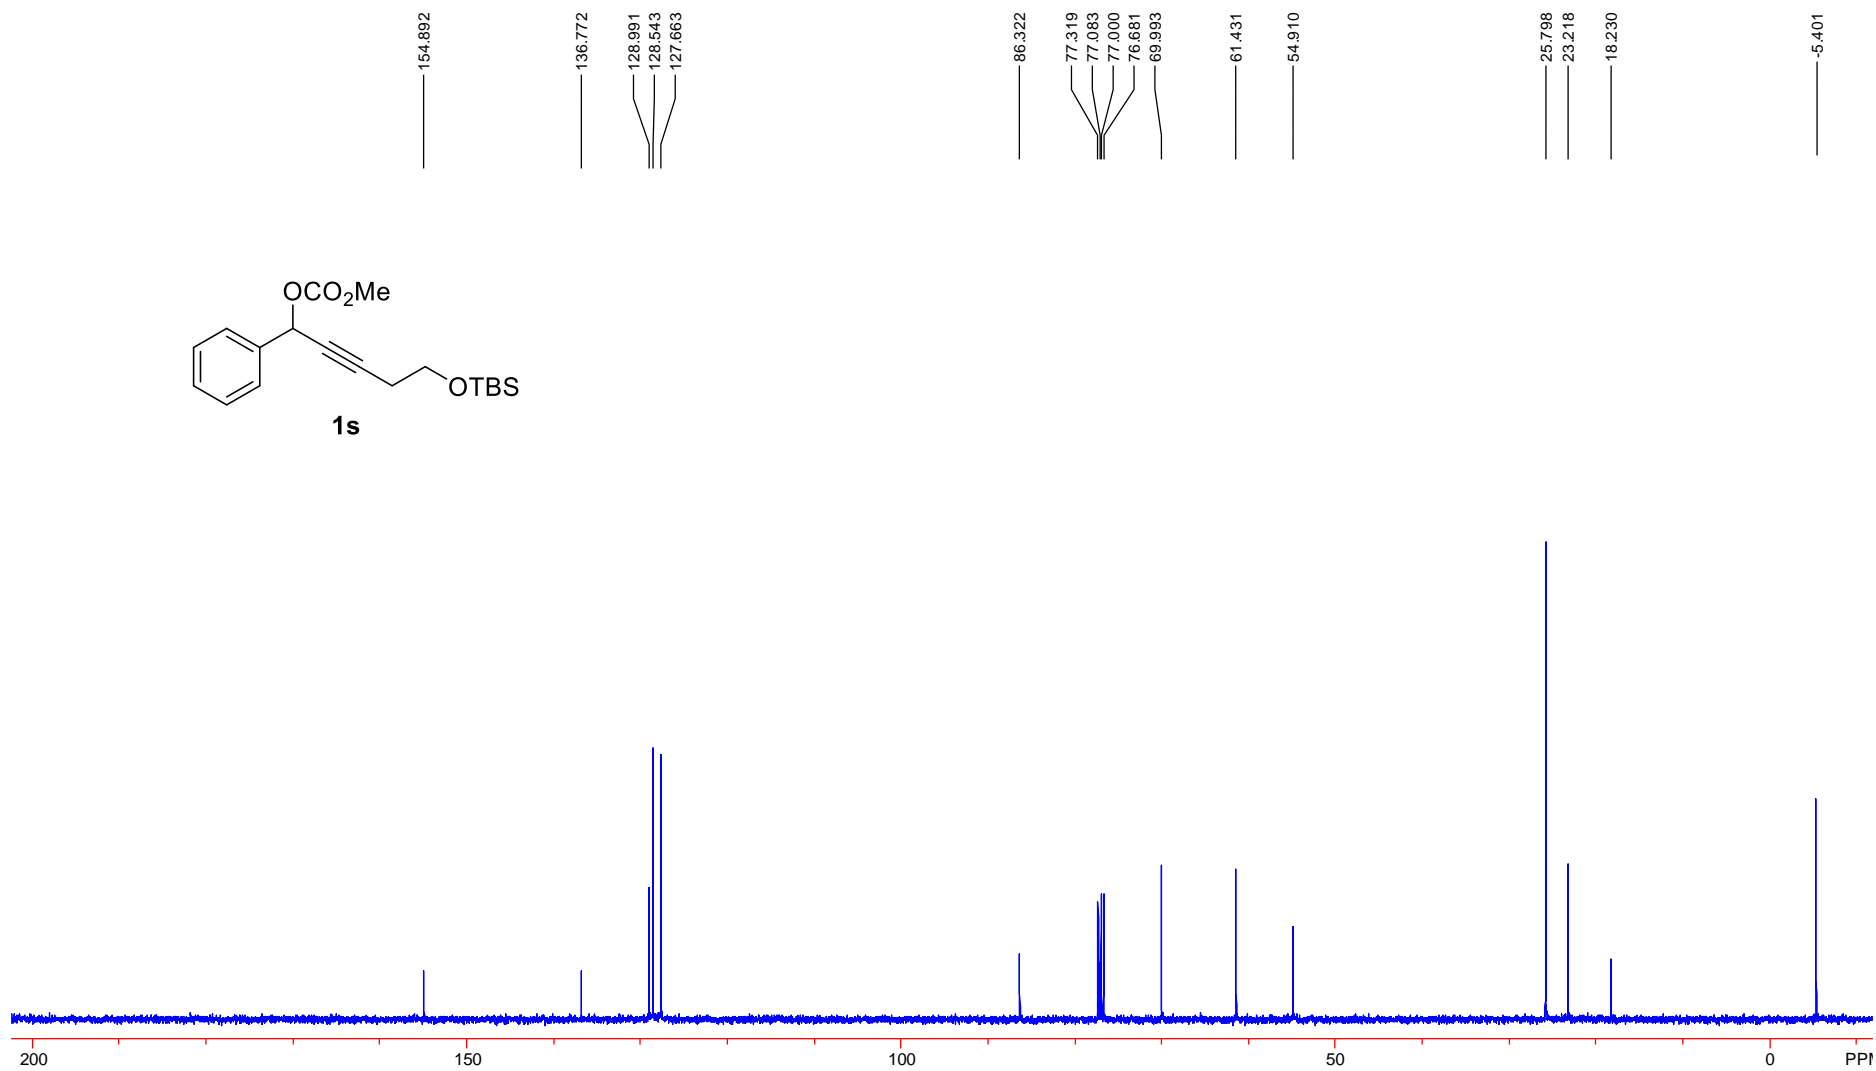

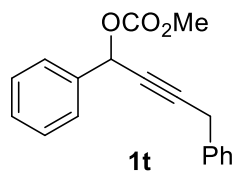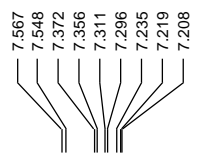

6.360

3.778  
3.690

-0.000

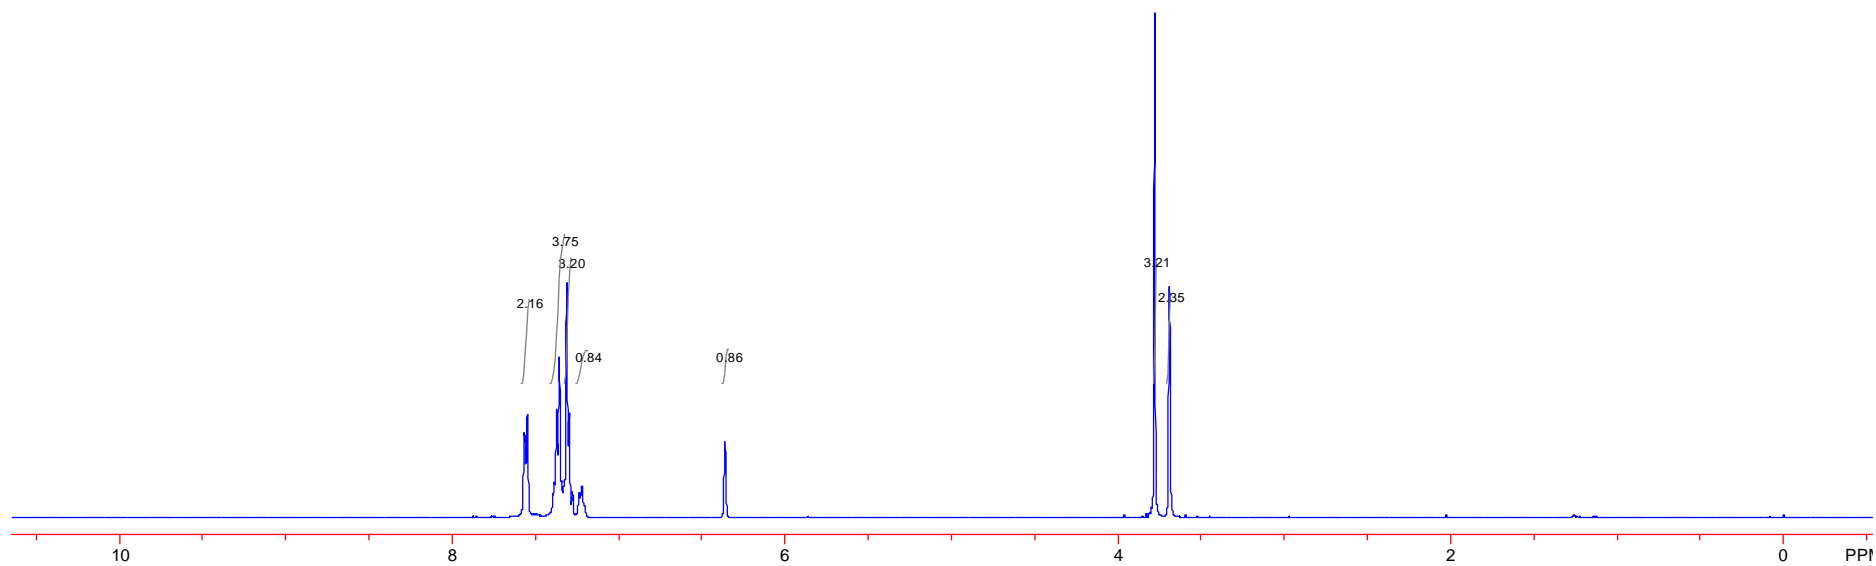

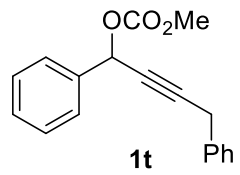

154.892

136.719  
135.838

129.052  
128.589  
128.482  
127.822  
127.693  
126.653

86.625

78.306  
77.319  
77.000  
76.681  
70.047

54.940

25.100

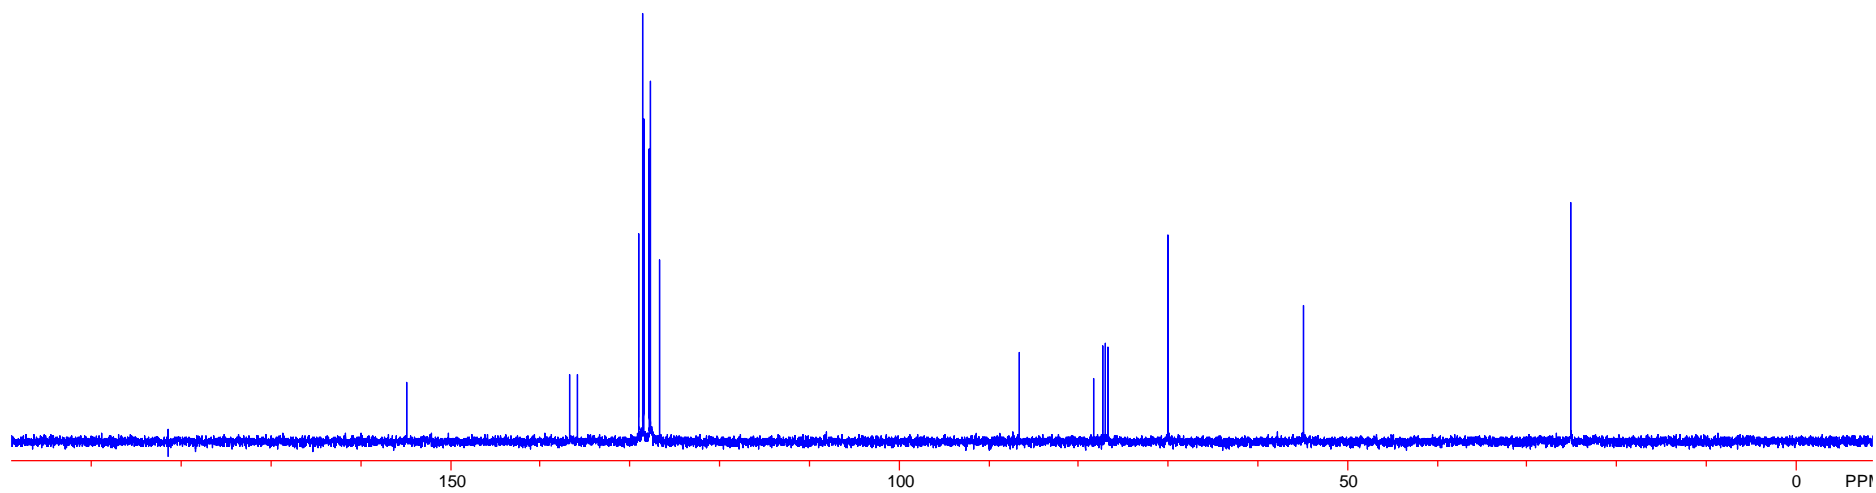

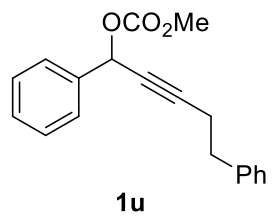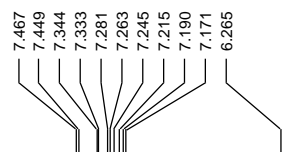

3.770

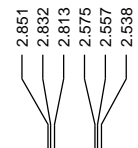

-0.000

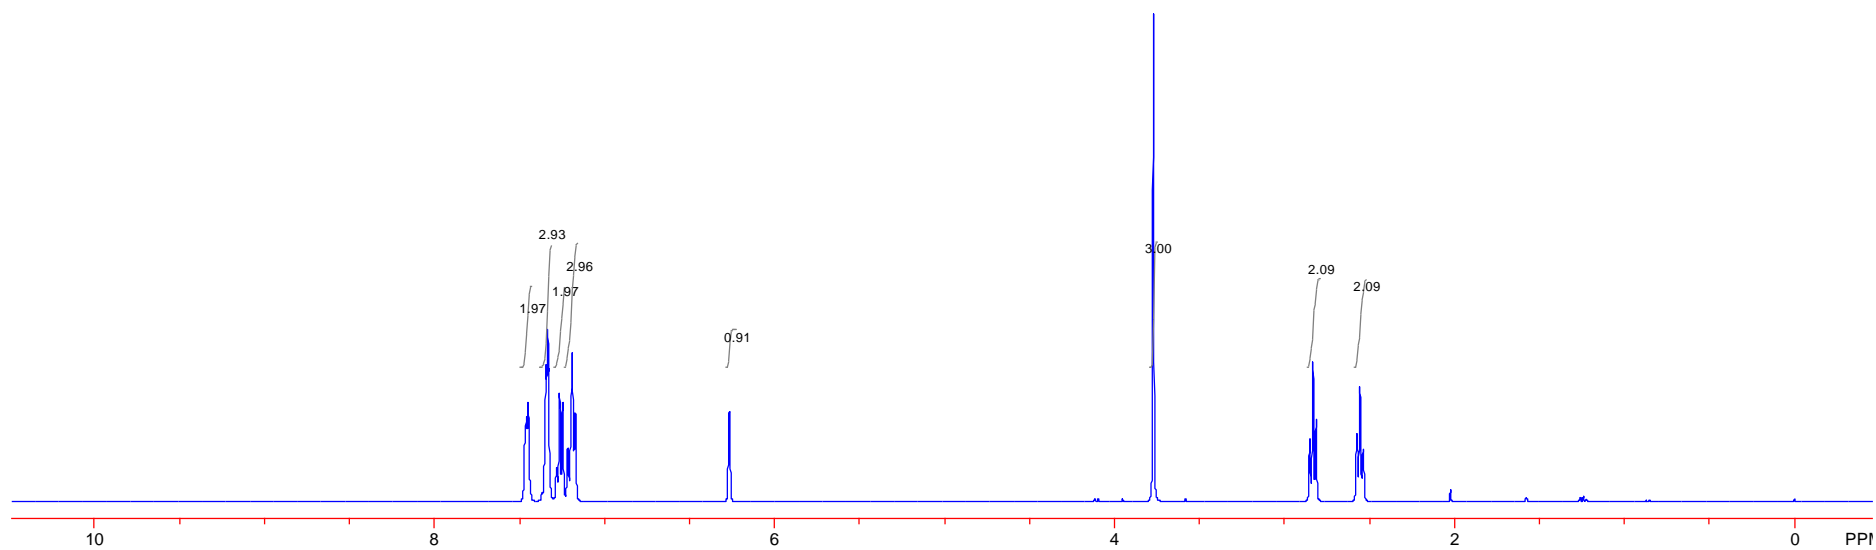

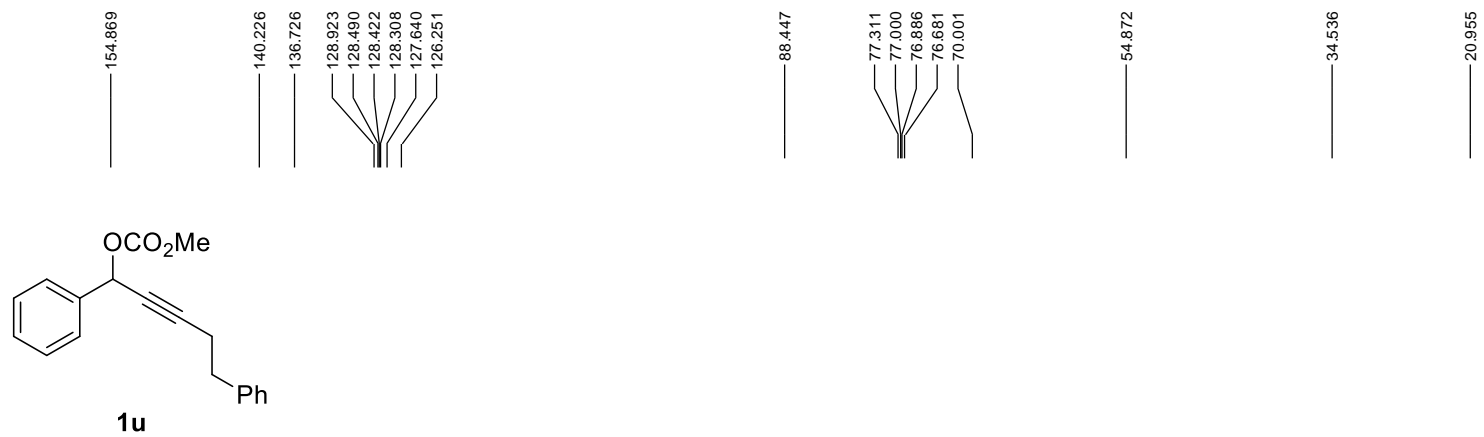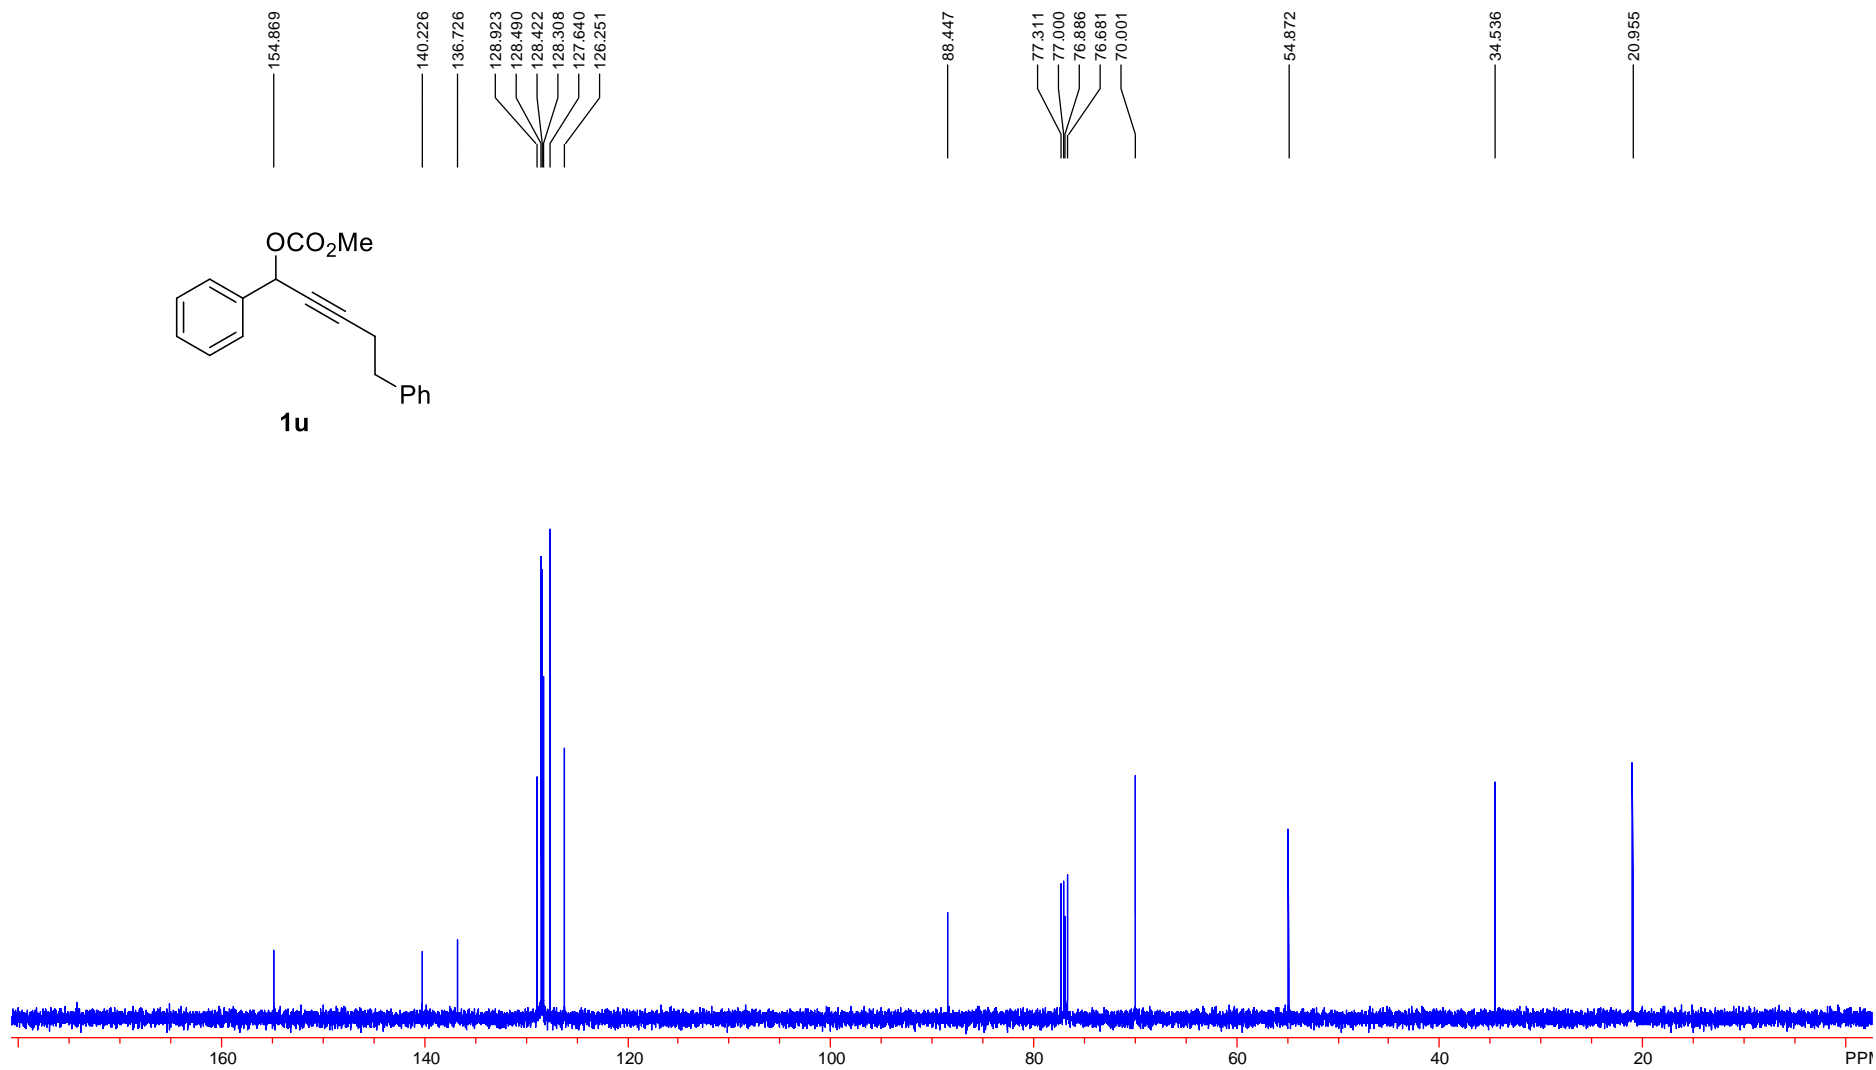



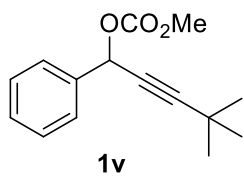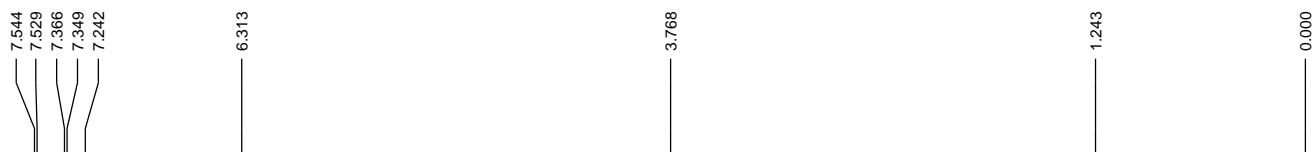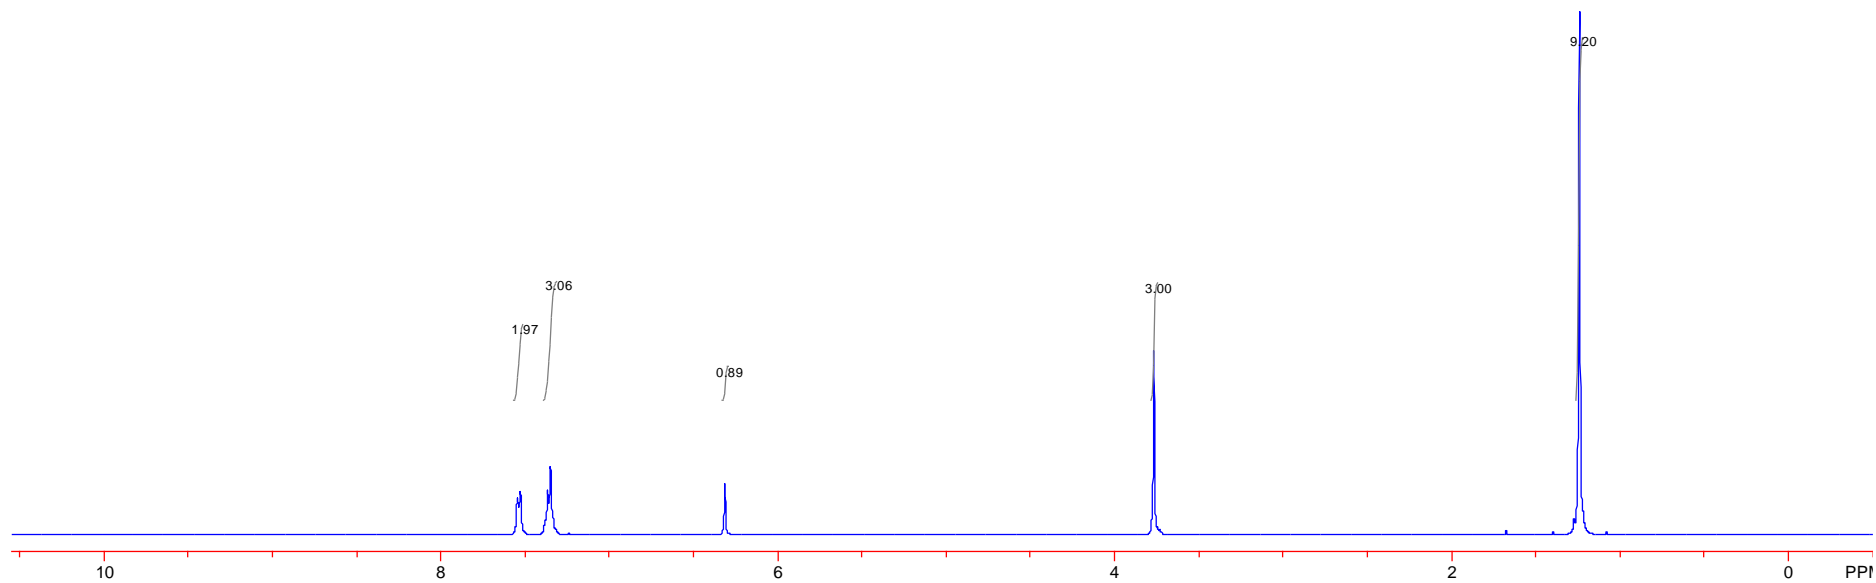

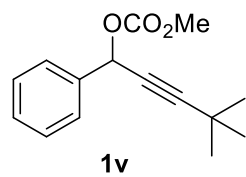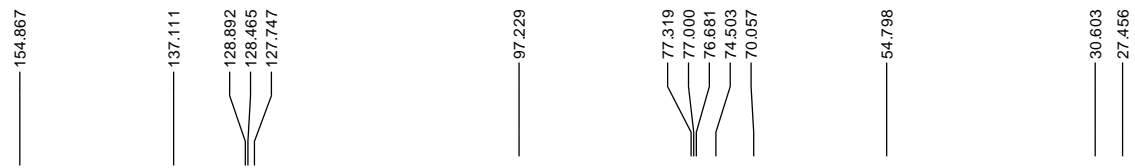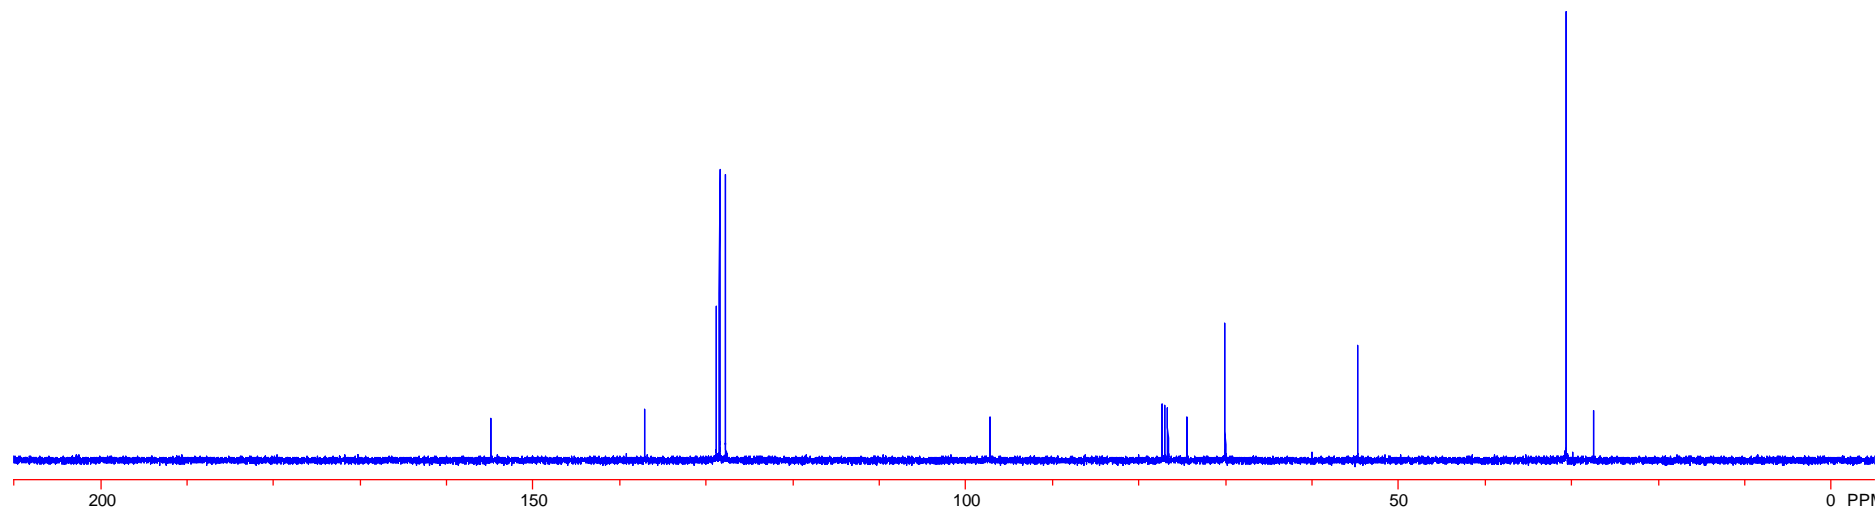

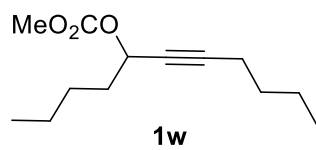

7.292

5.220  
5.204  
5.188

3.793

2.232  
2.215  
2.197  
1.796  
1.777  
1.759  
1.508  
1.471  
1.432  
1.410  
1.386  
1.358  
0.923  
0.904  
0.887

0.000

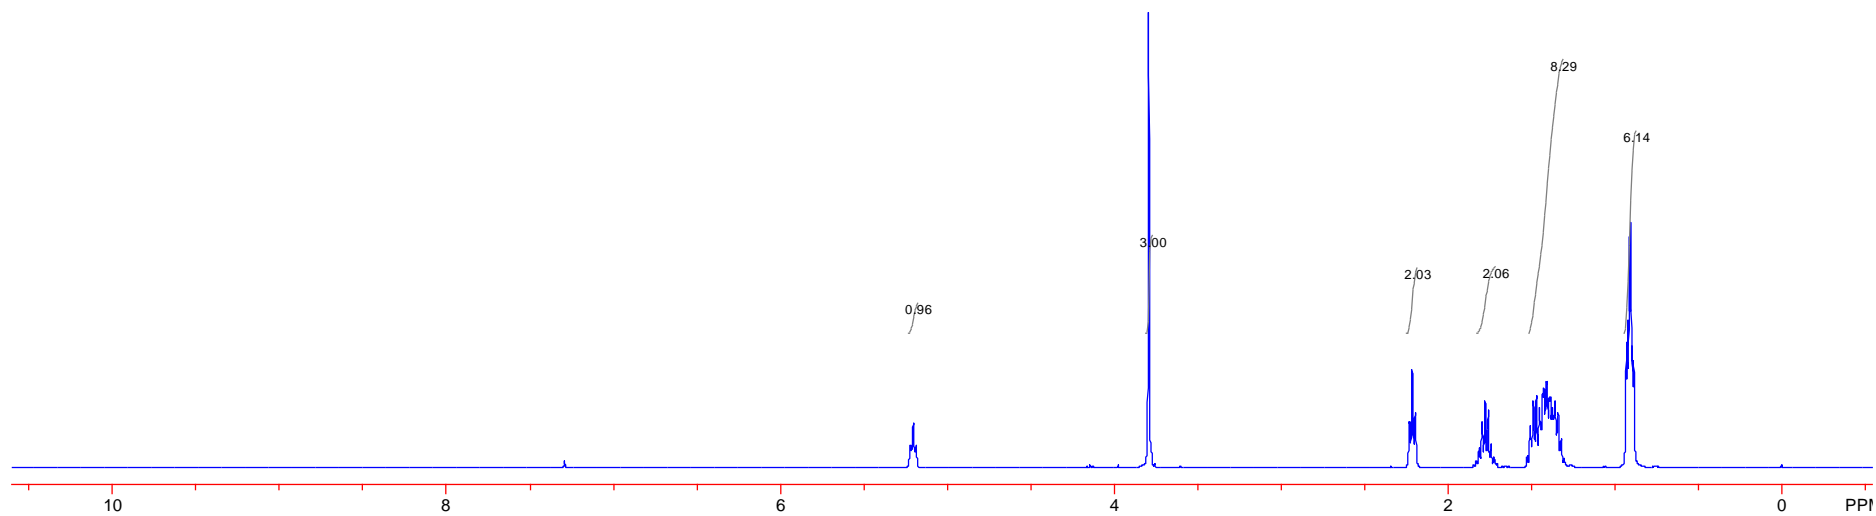

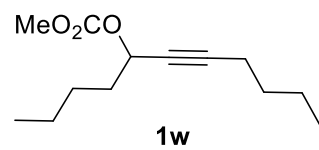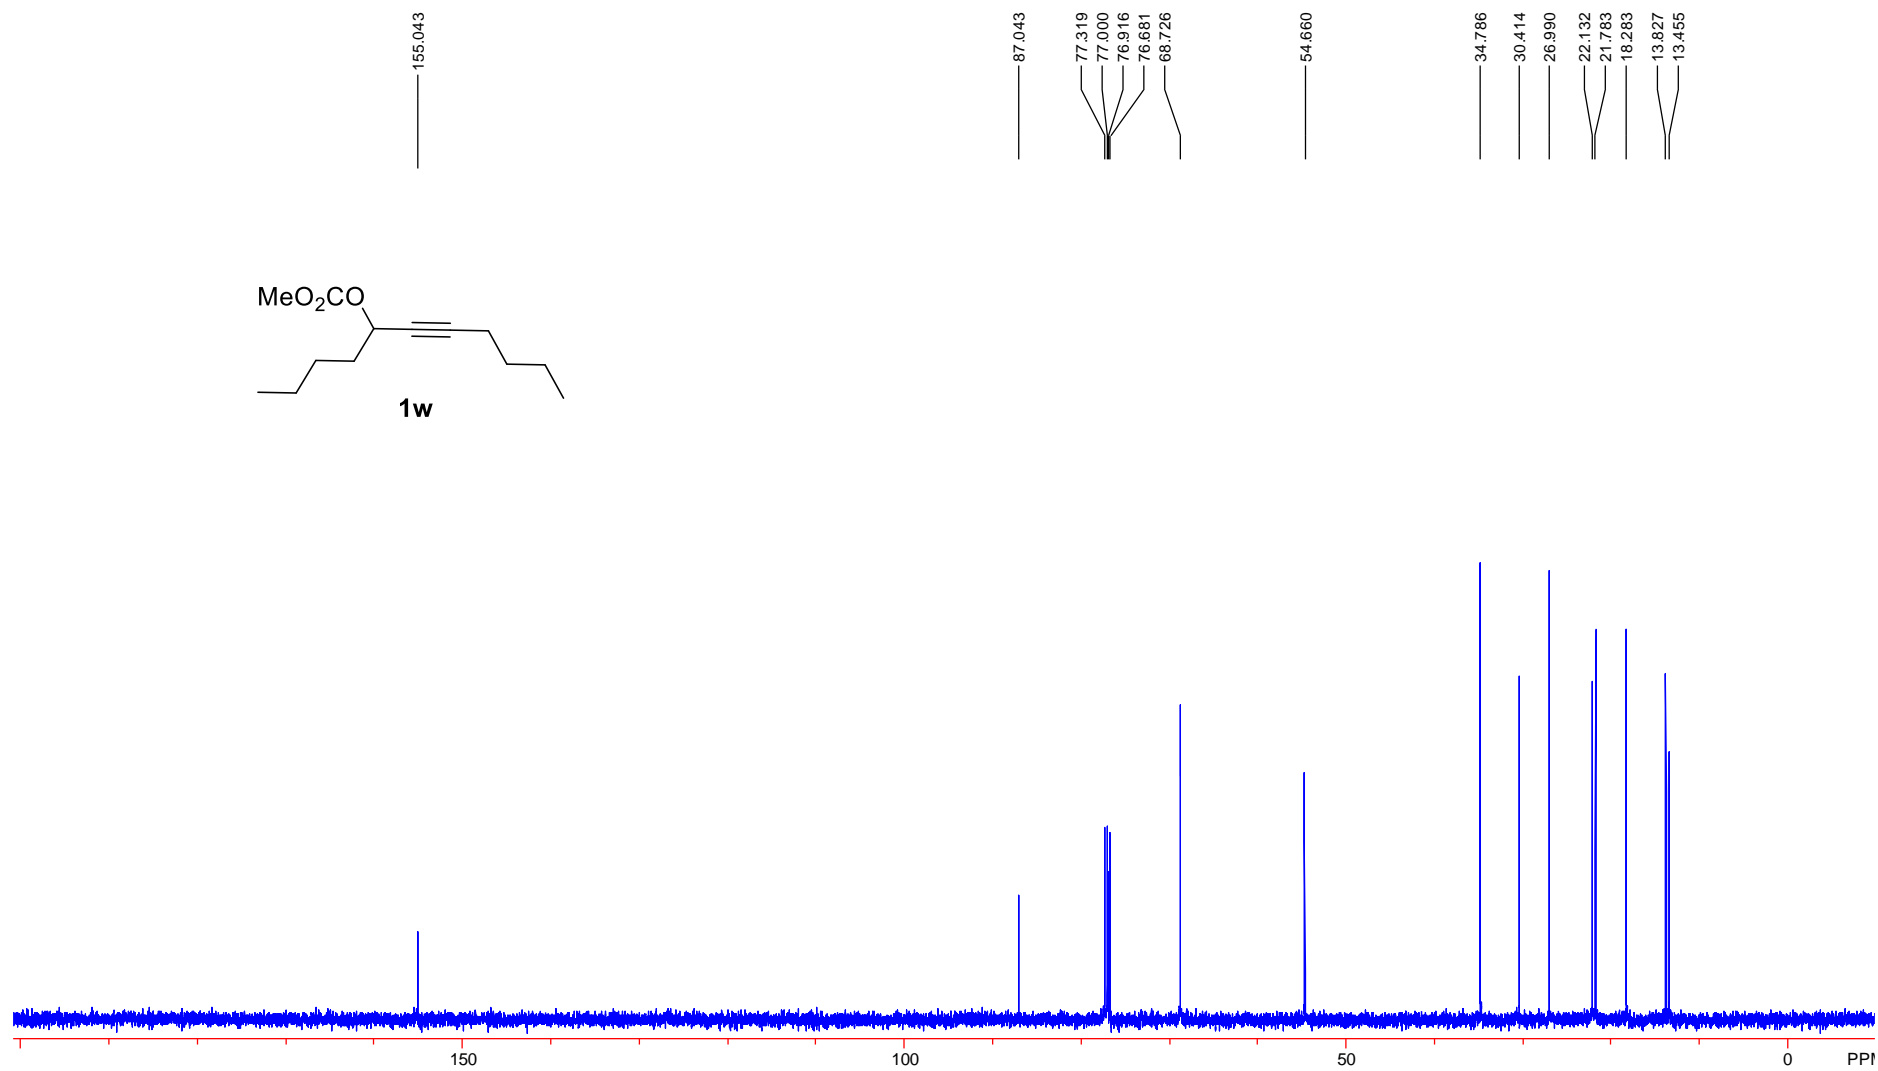

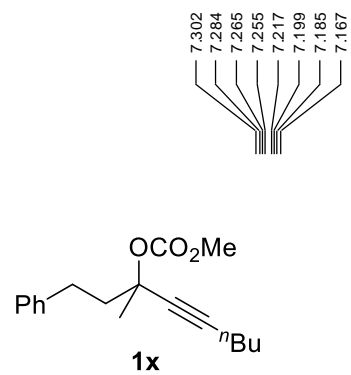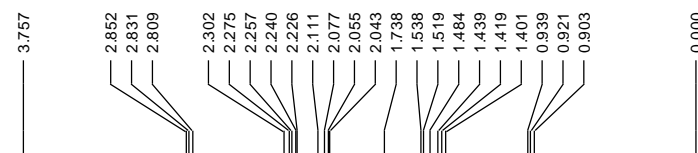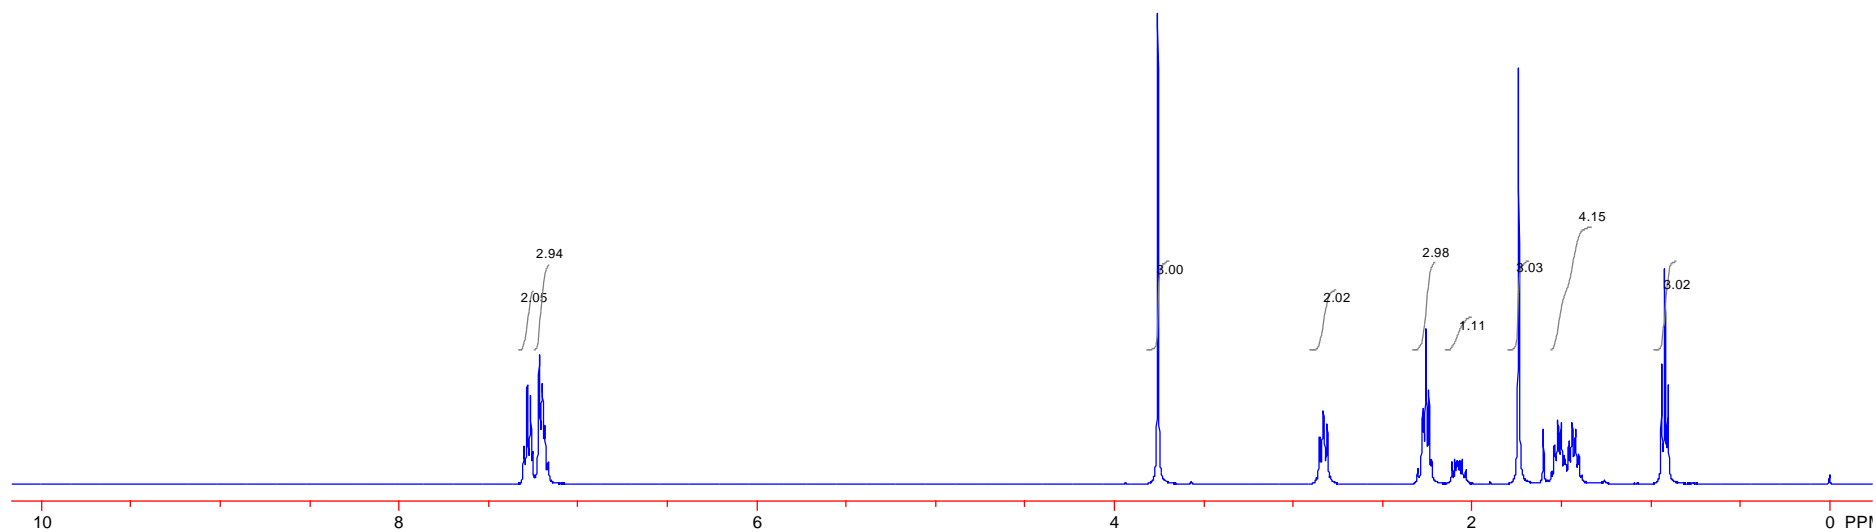

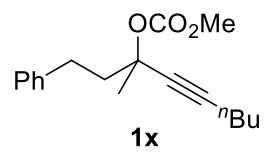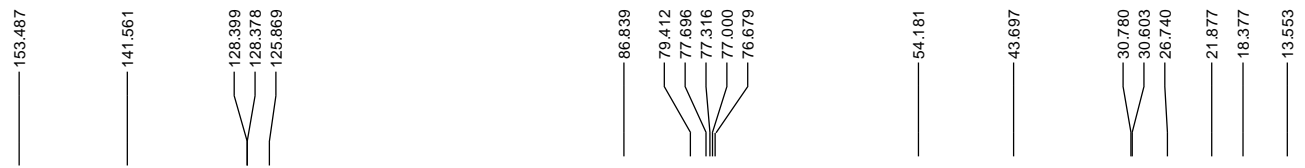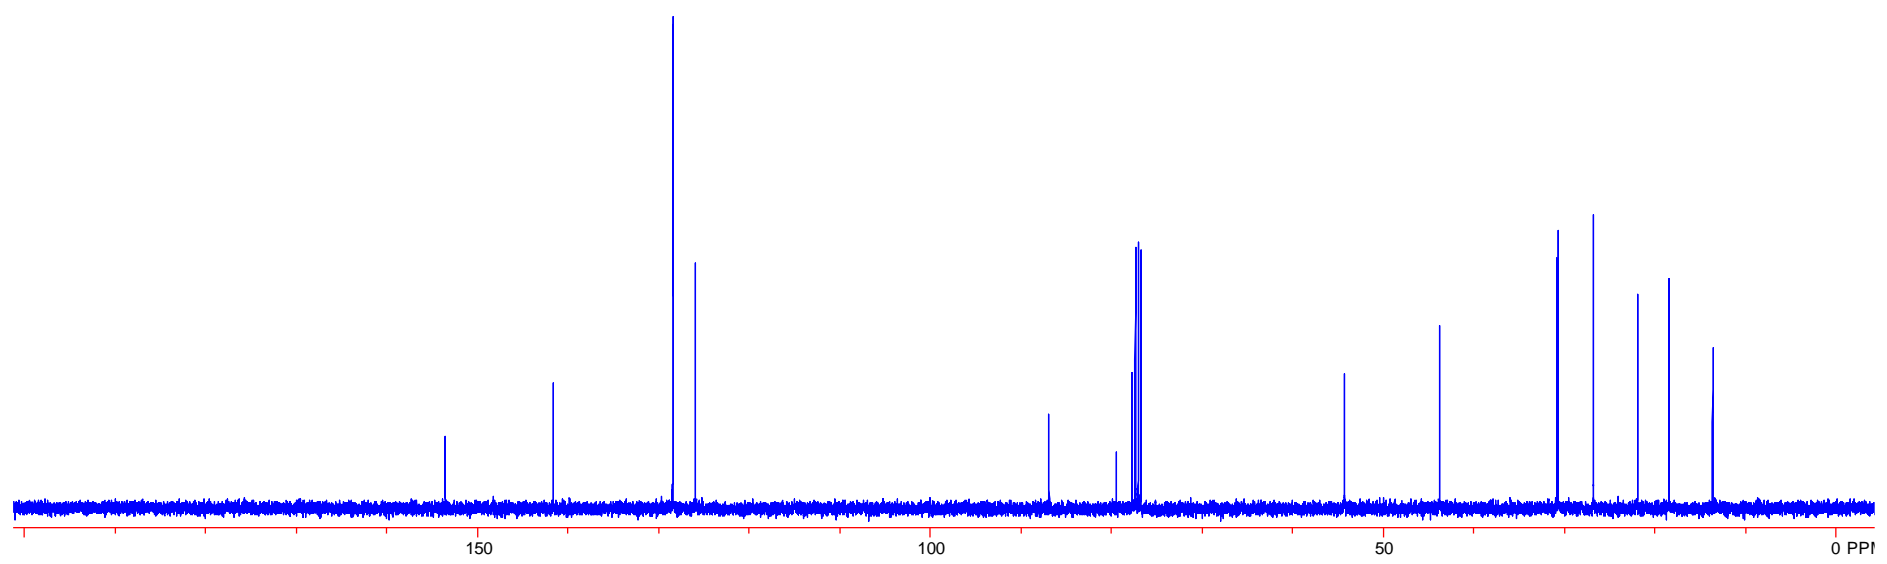

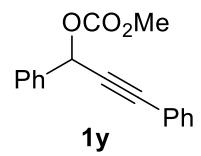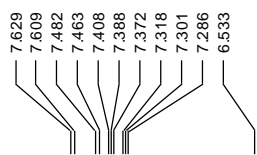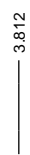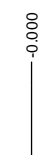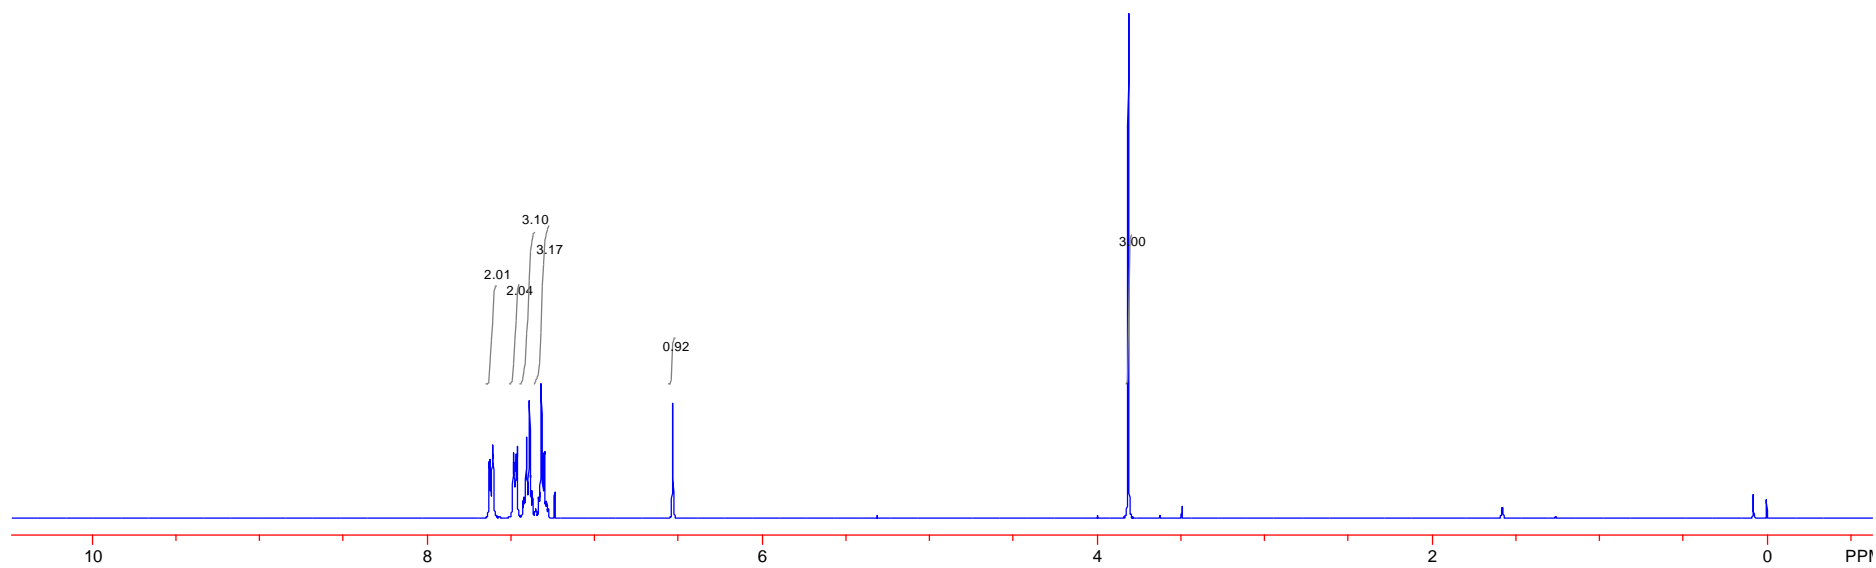

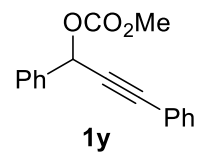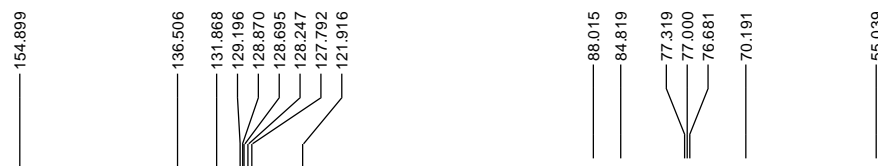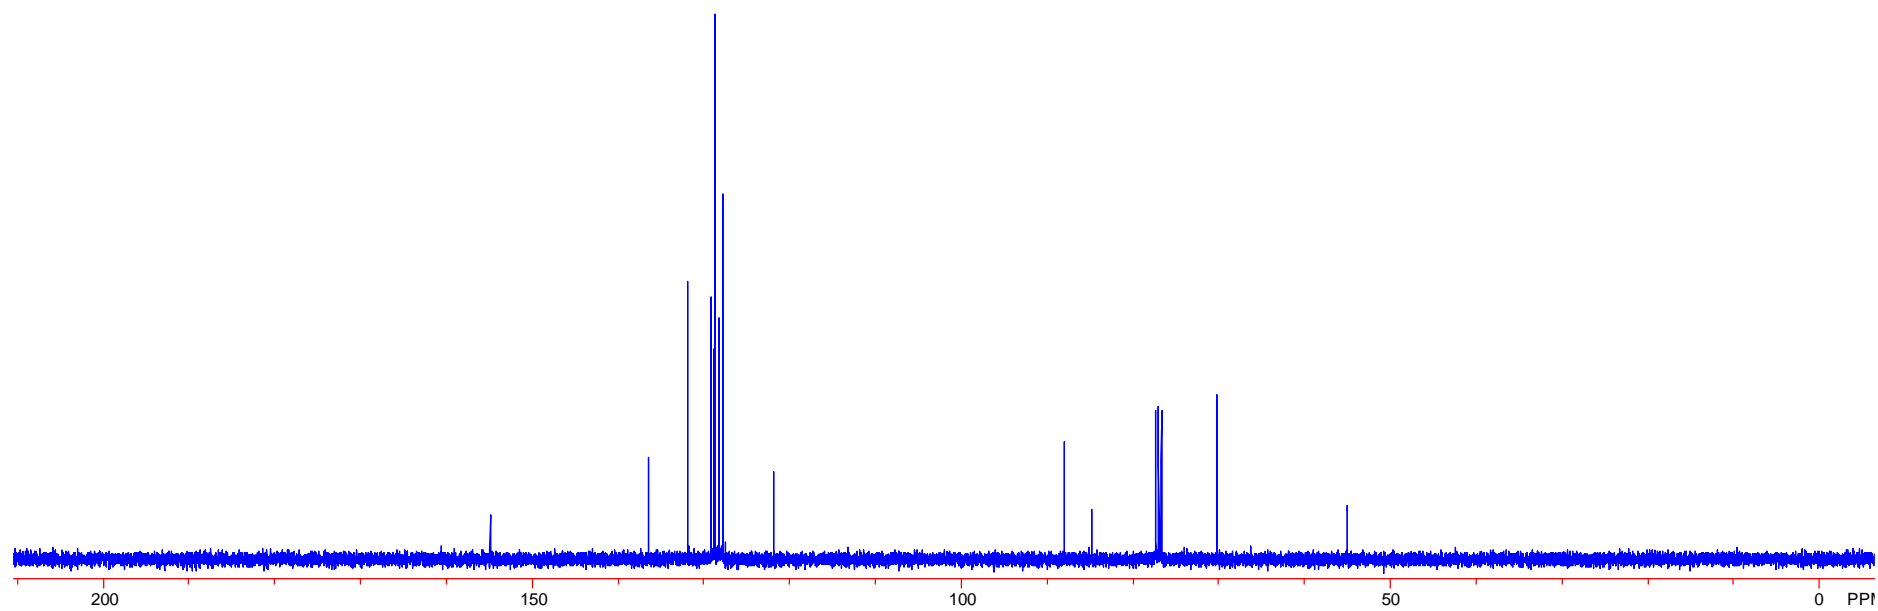



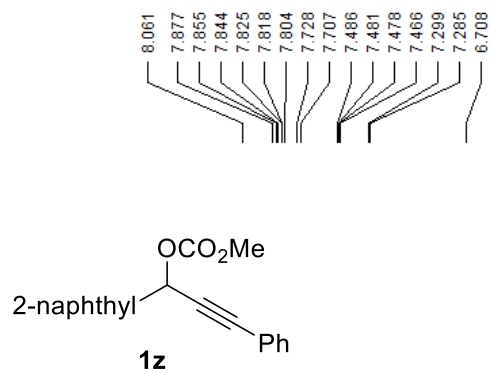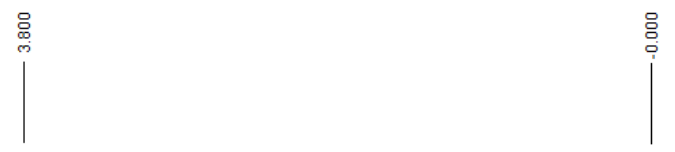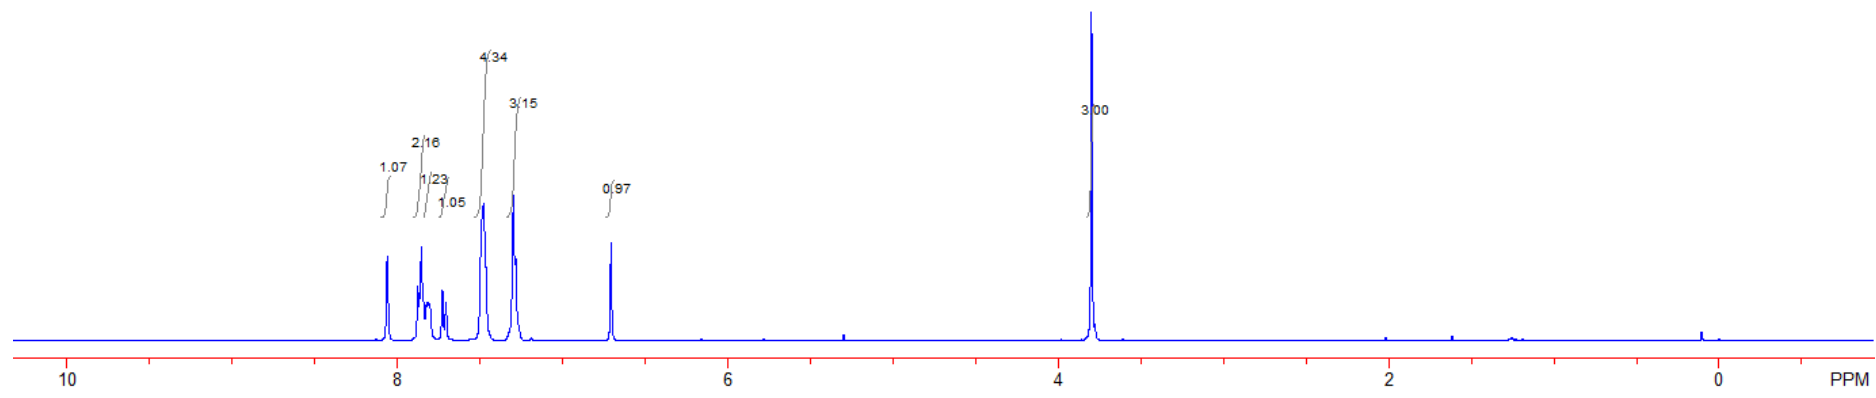

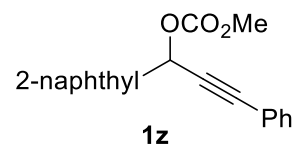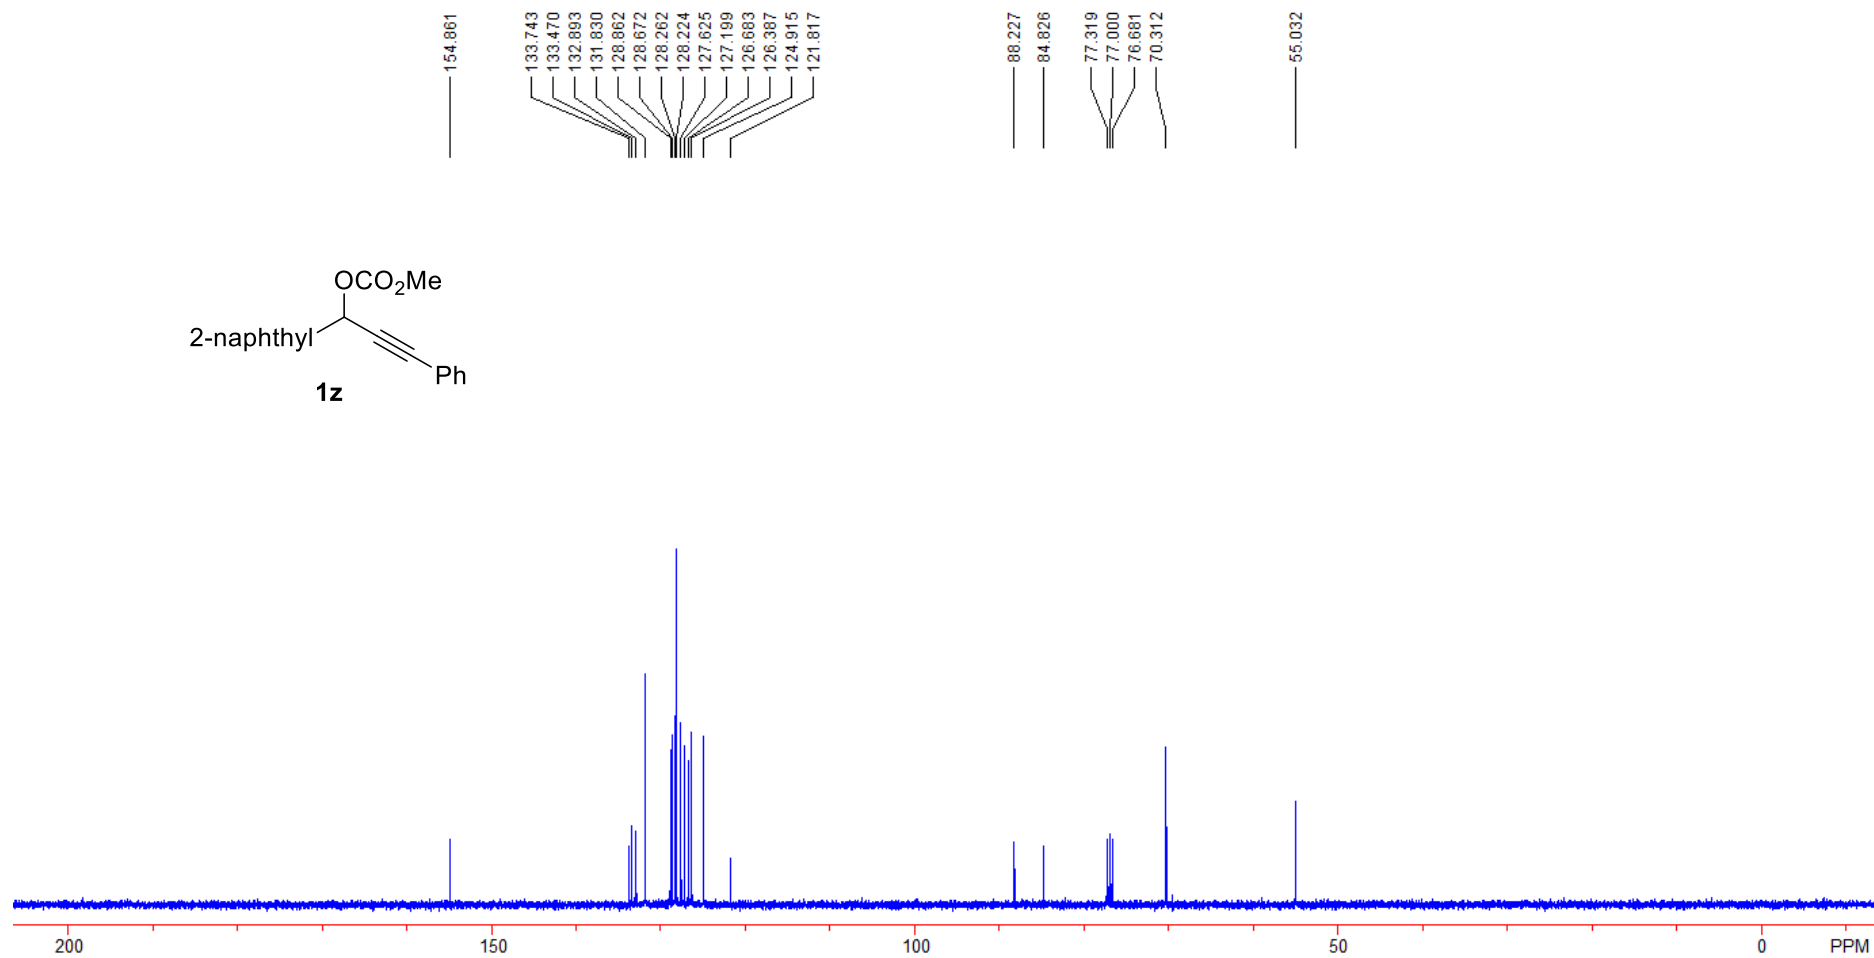

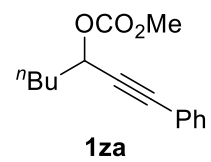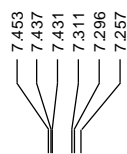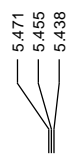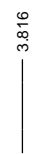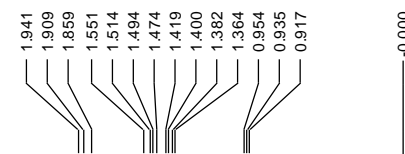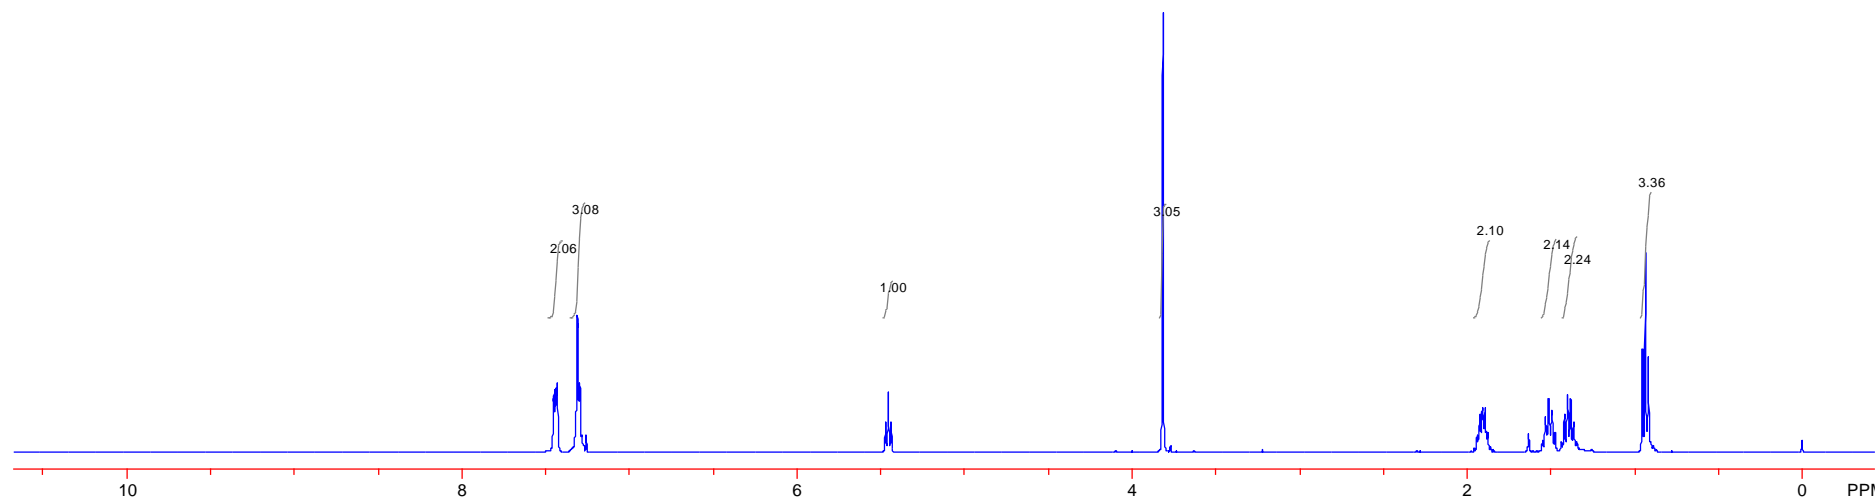

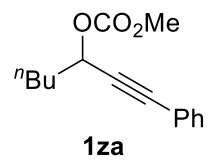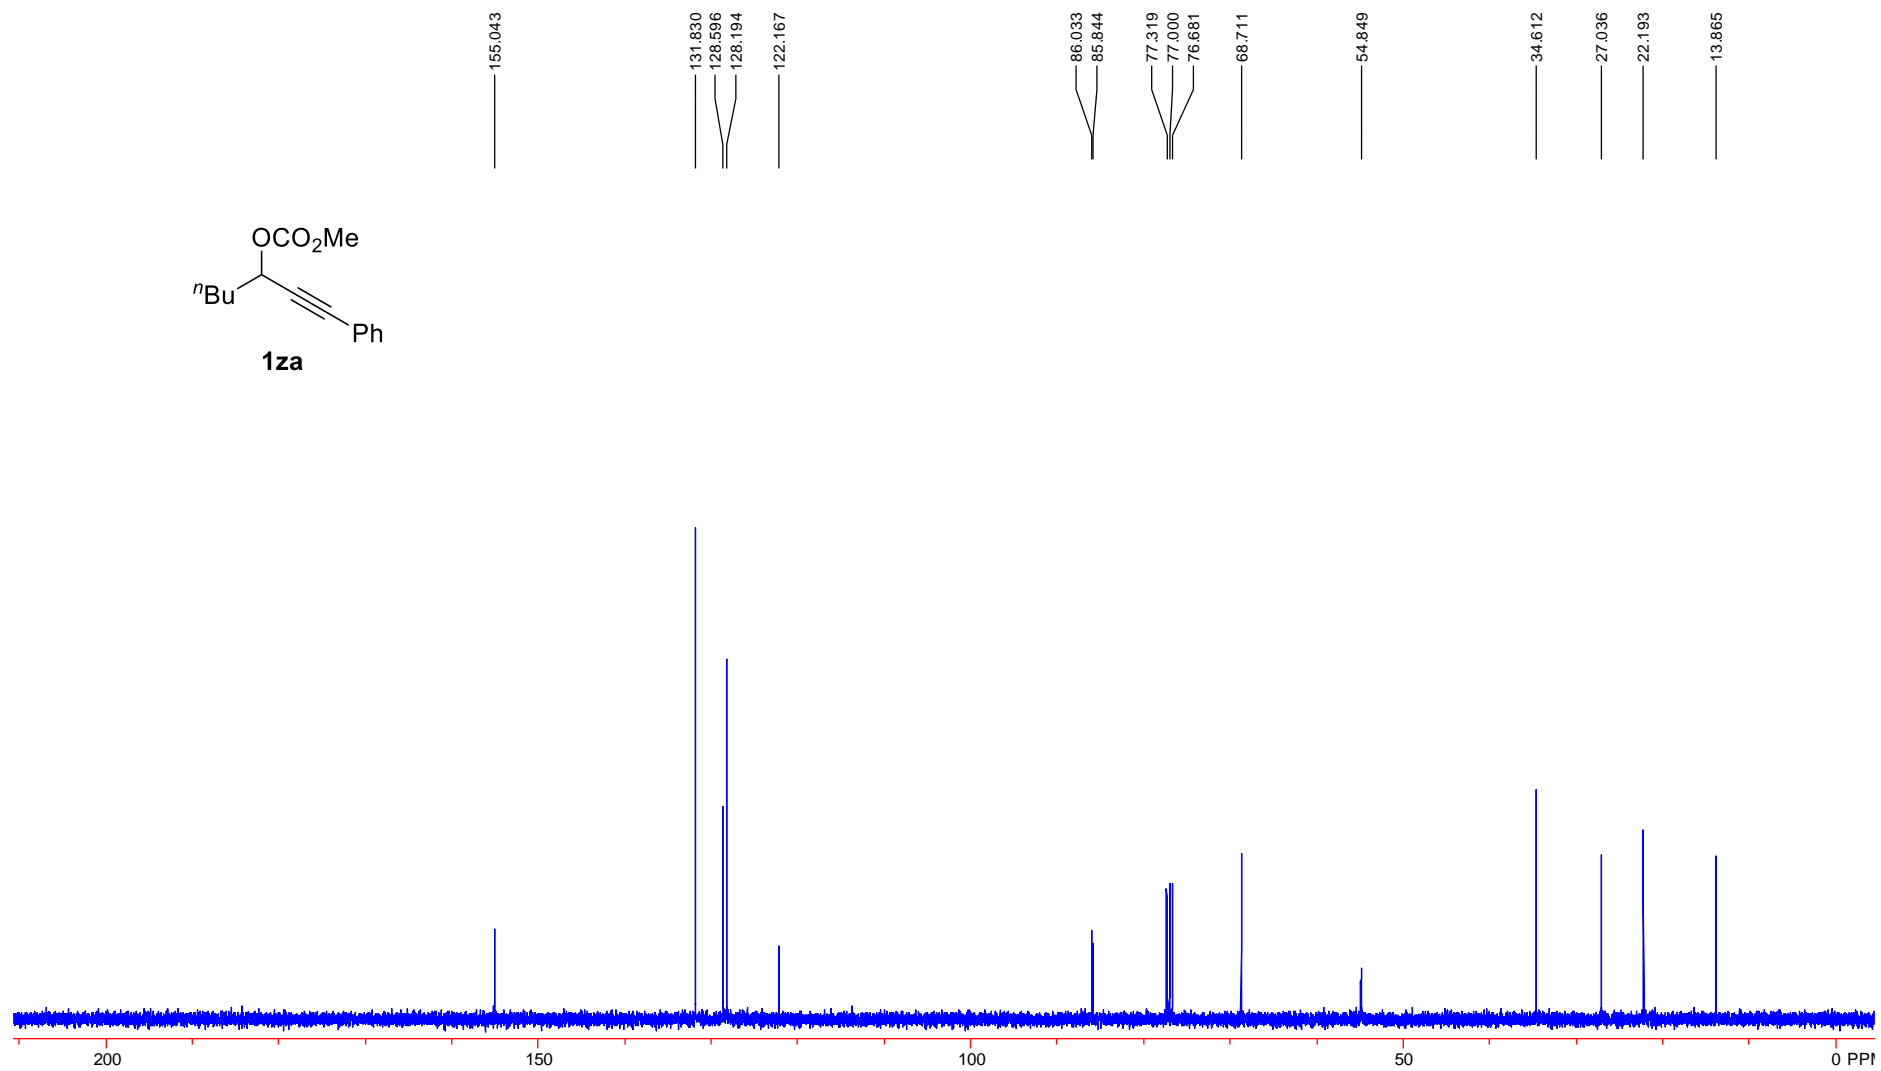

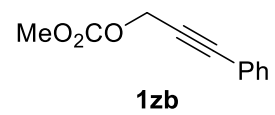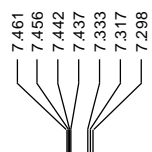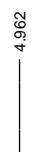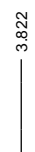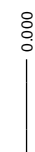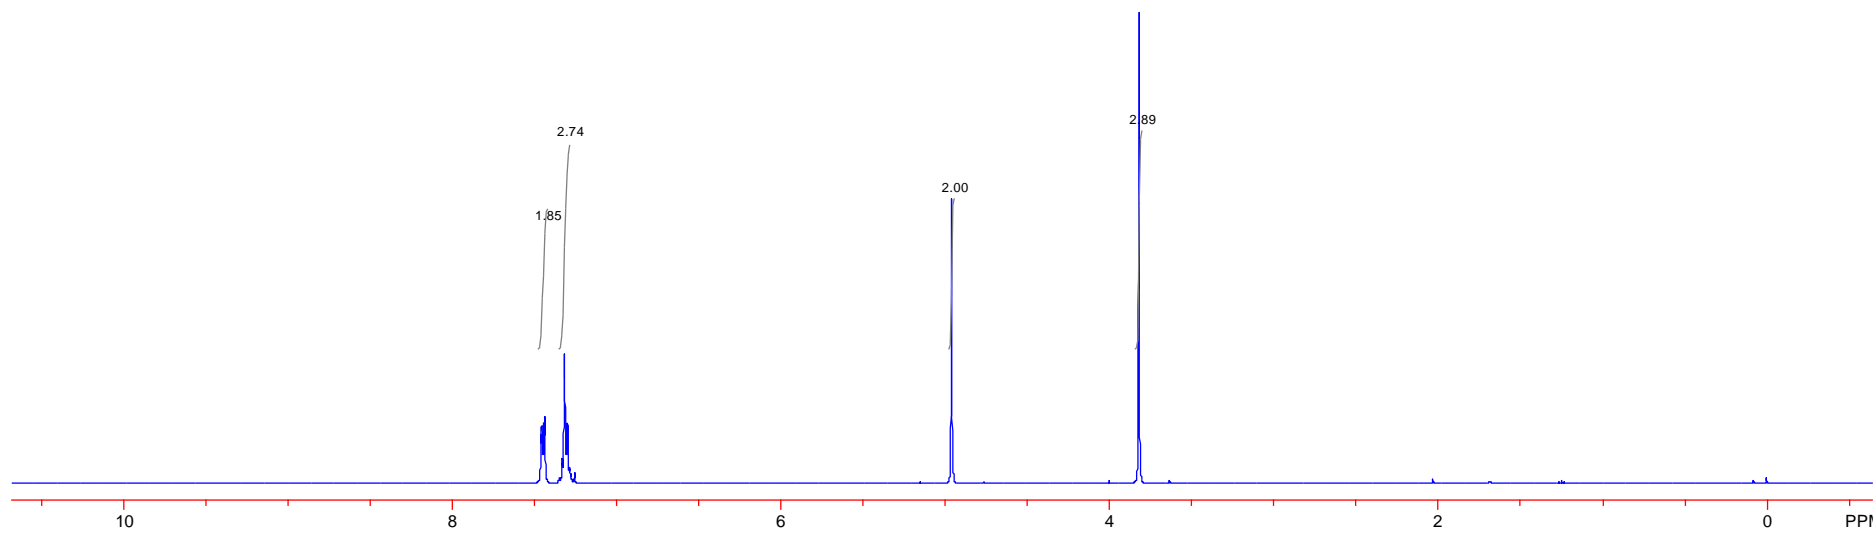

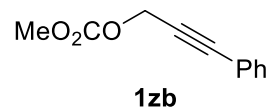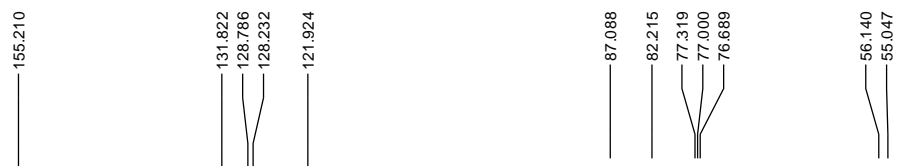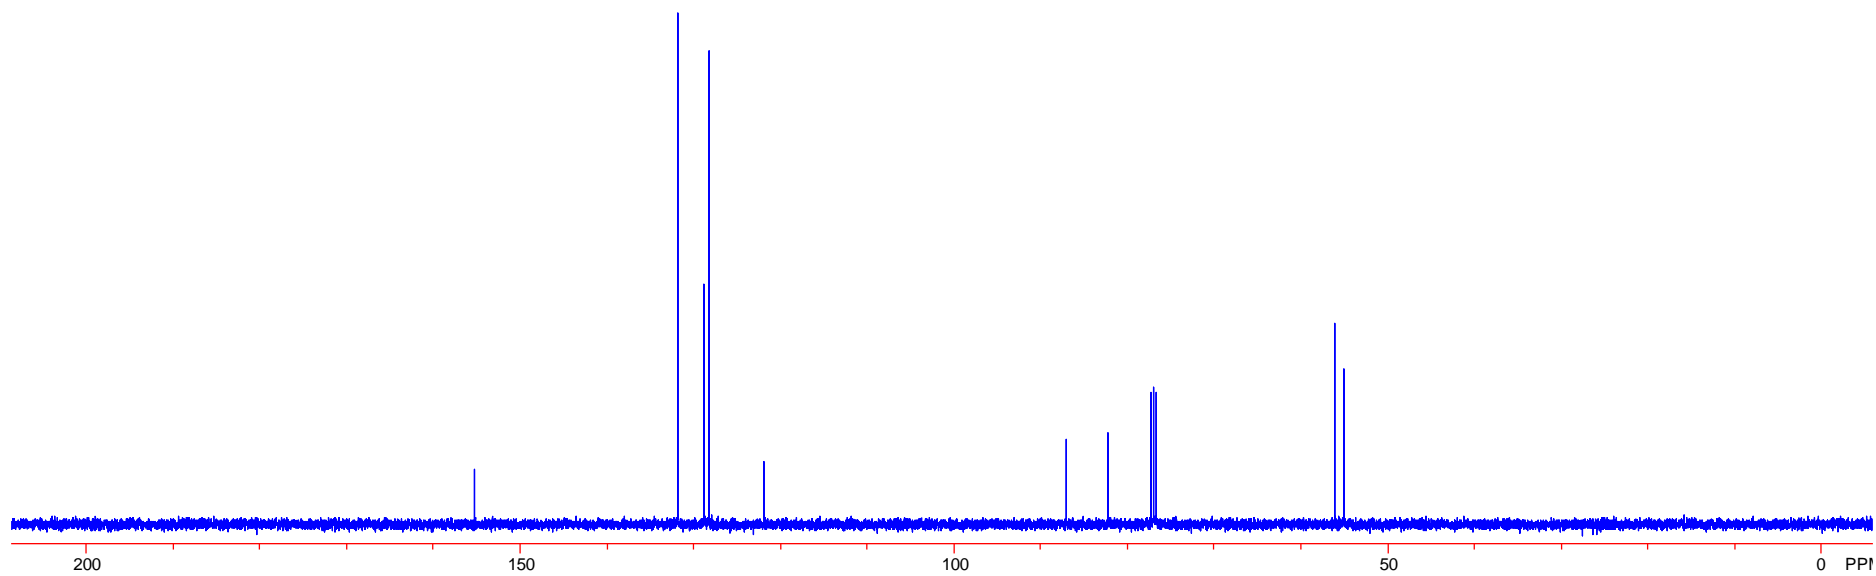

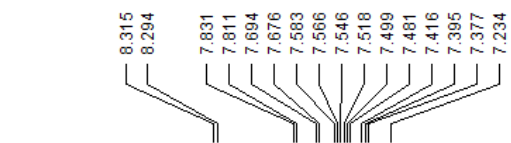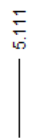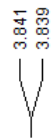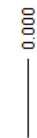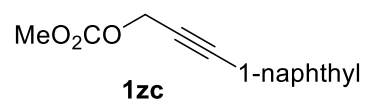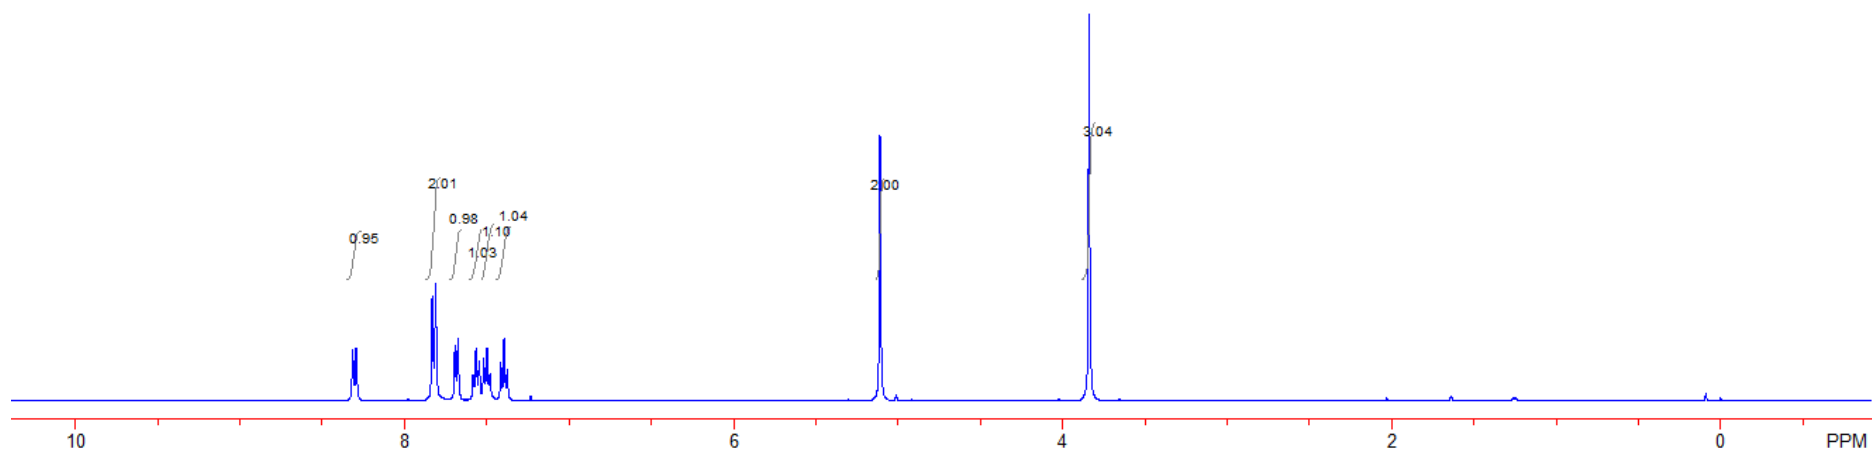

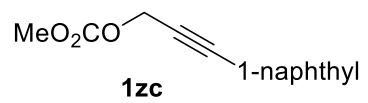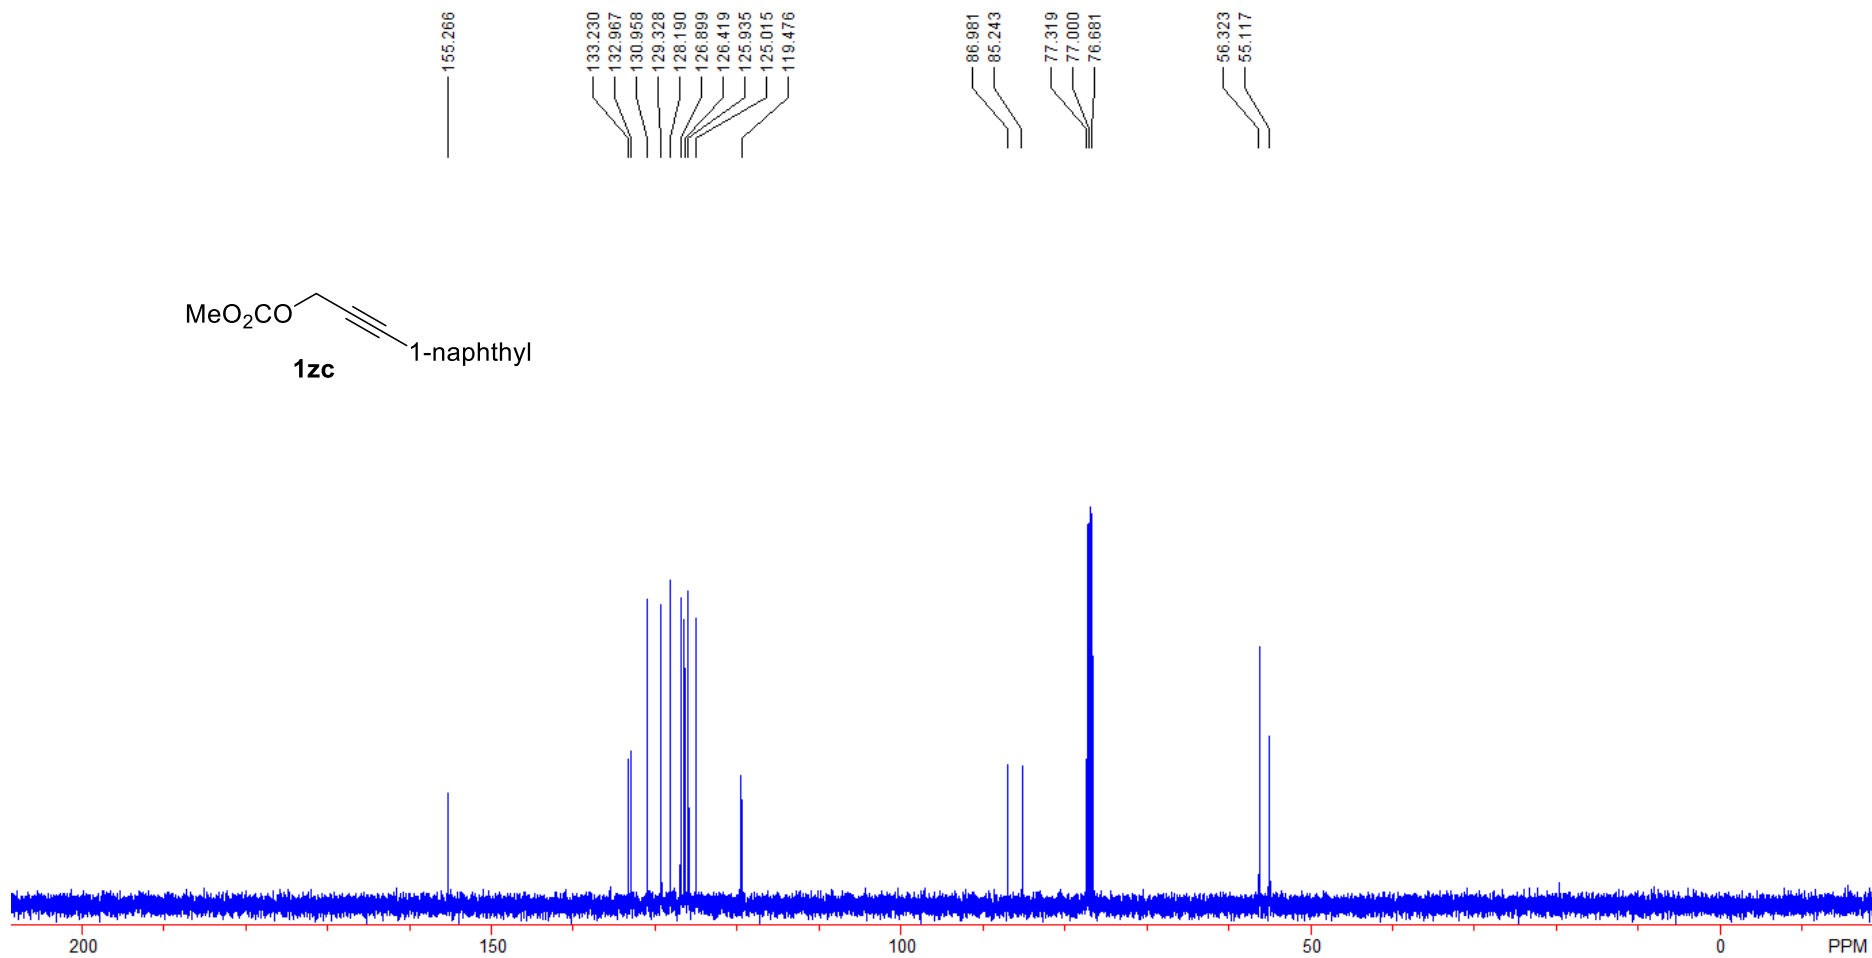



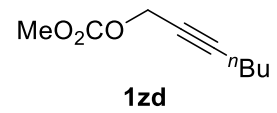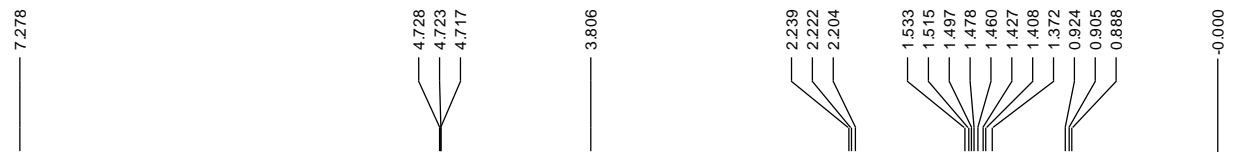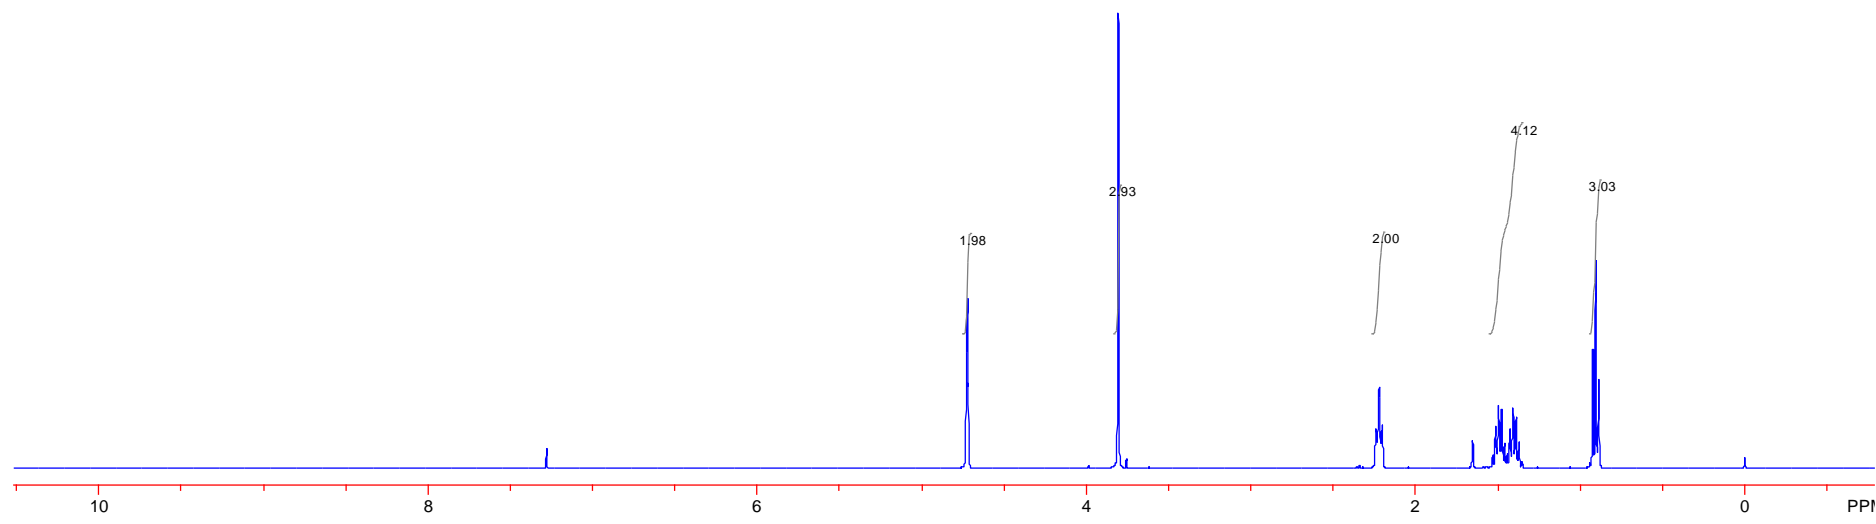

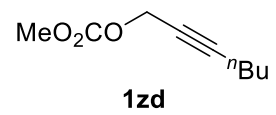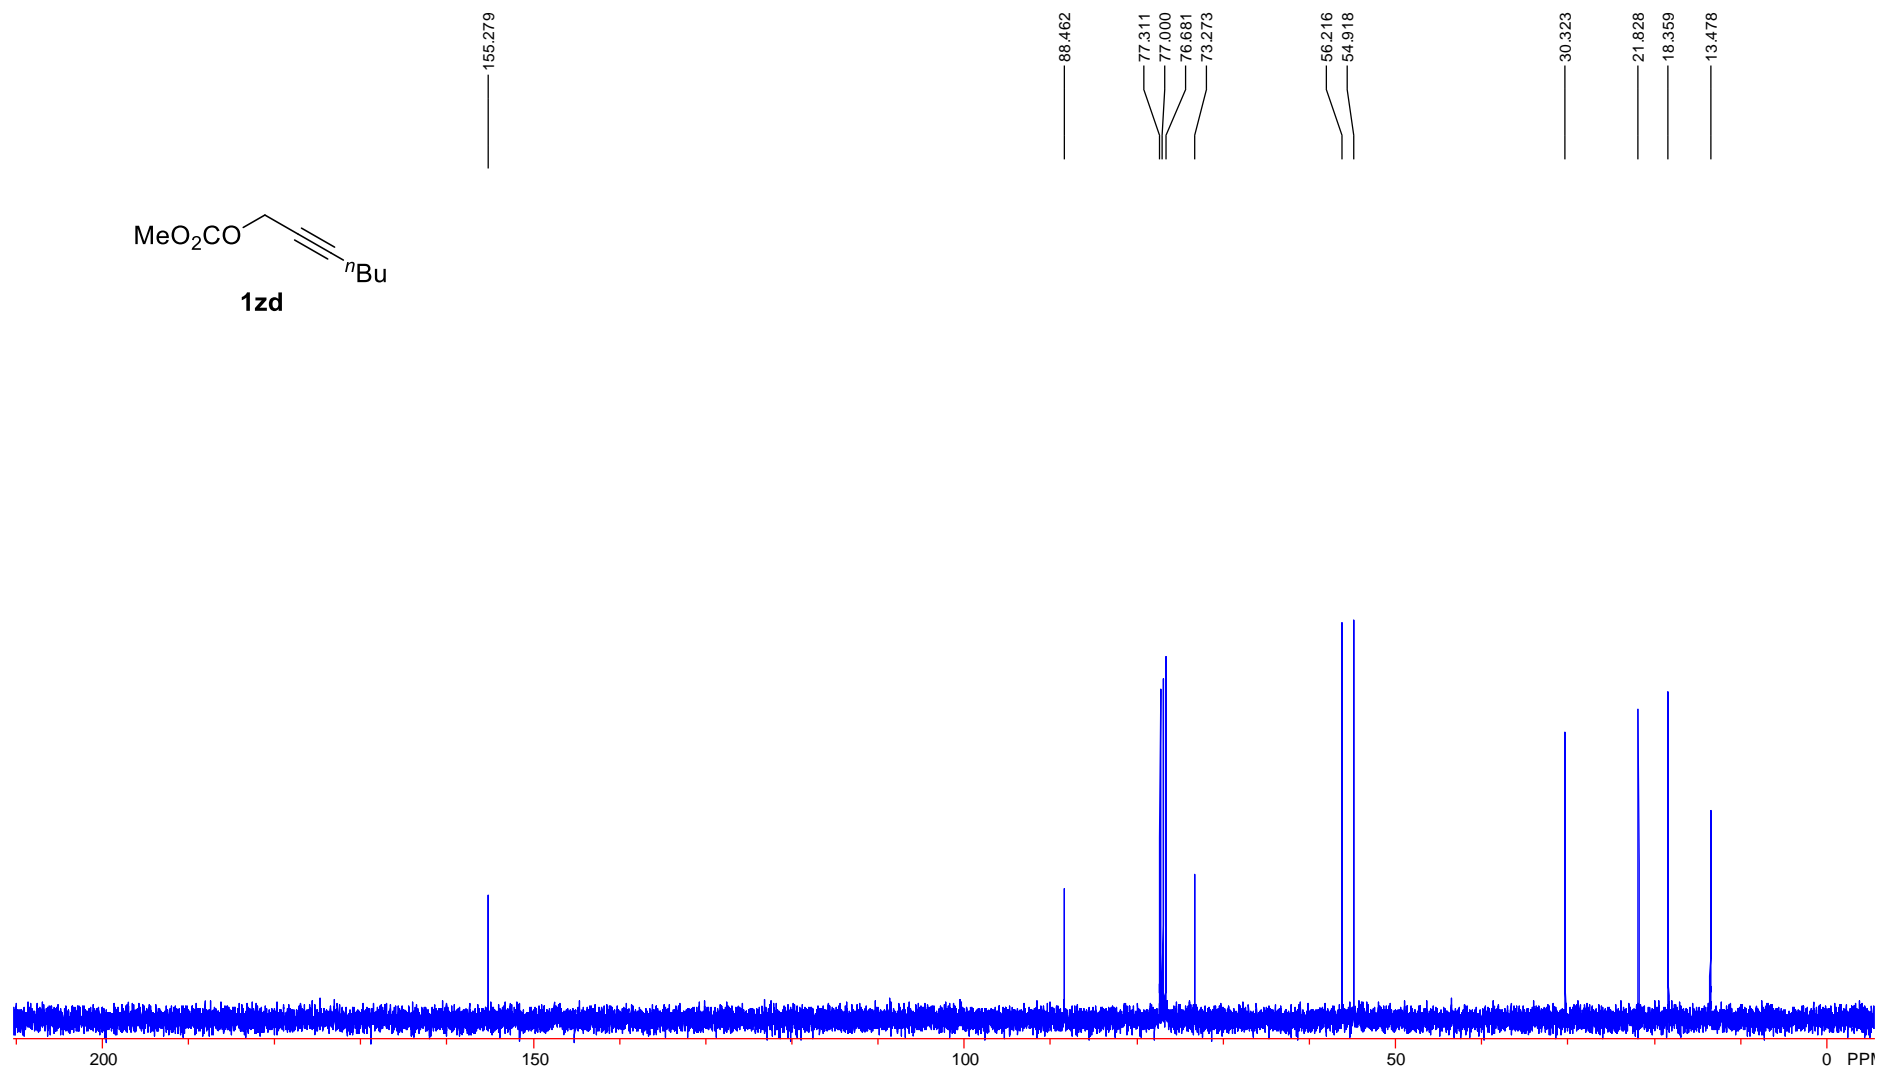

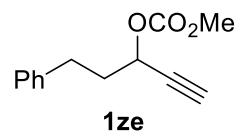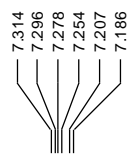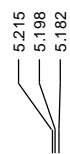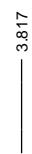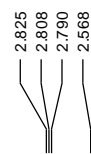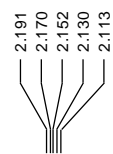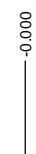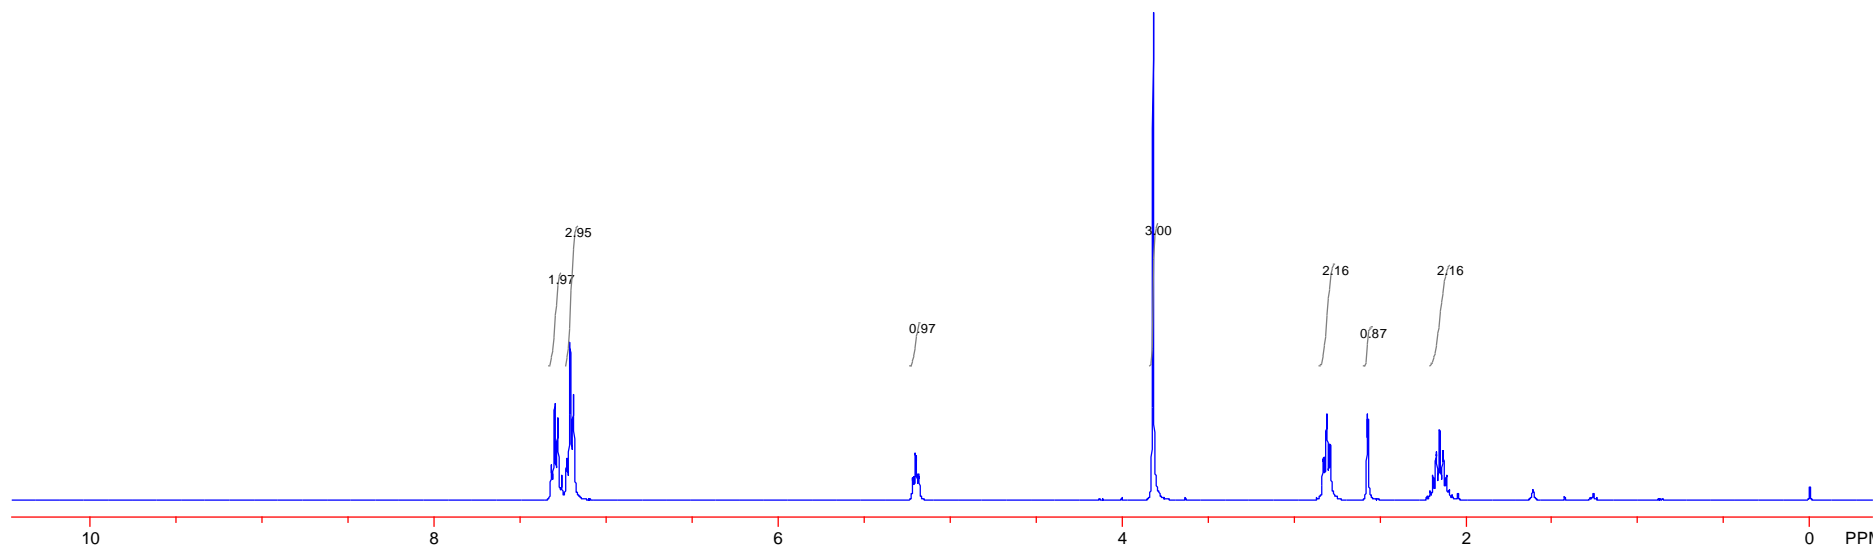

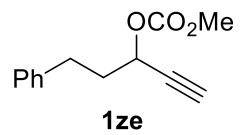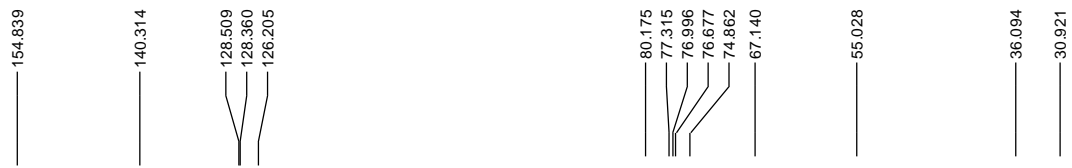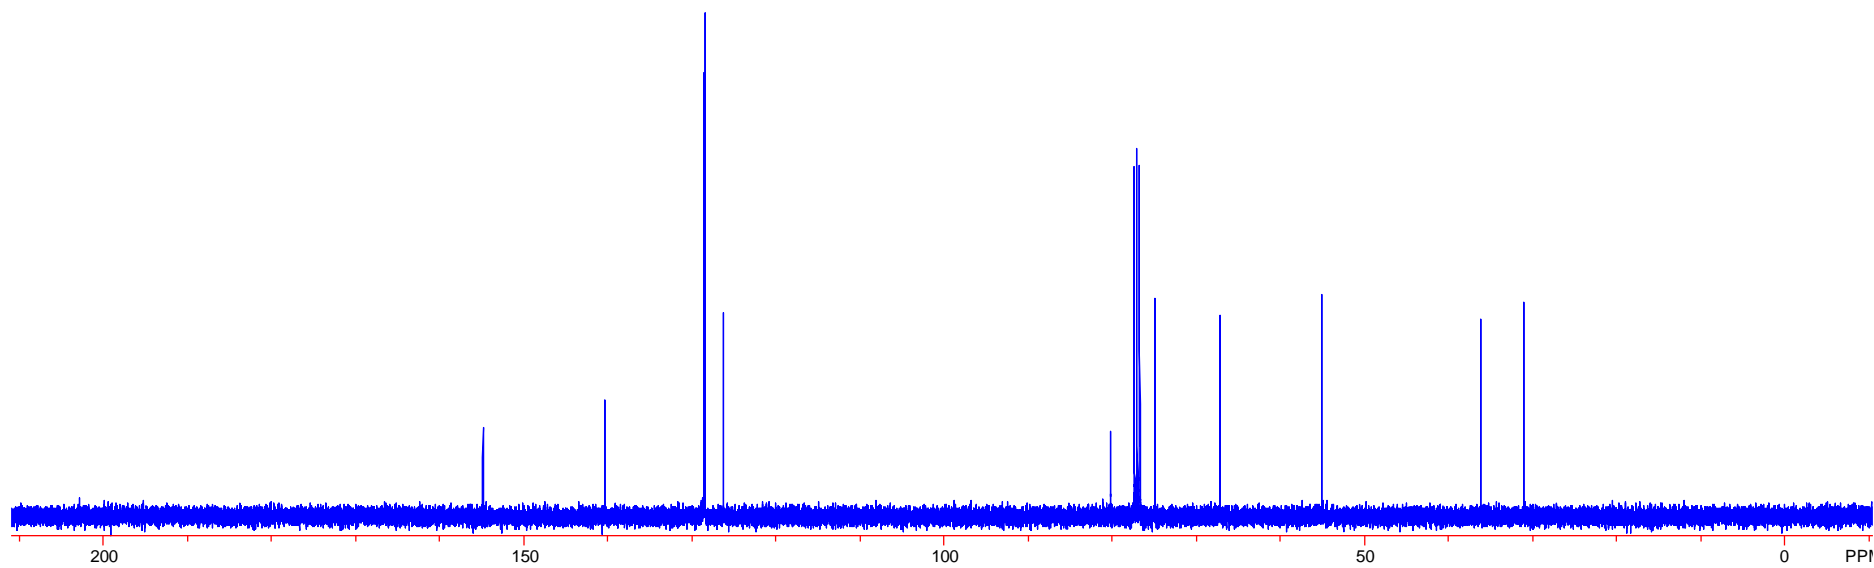

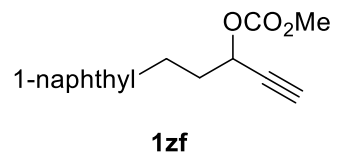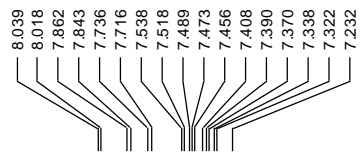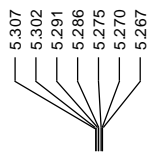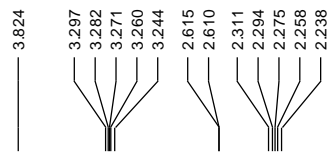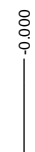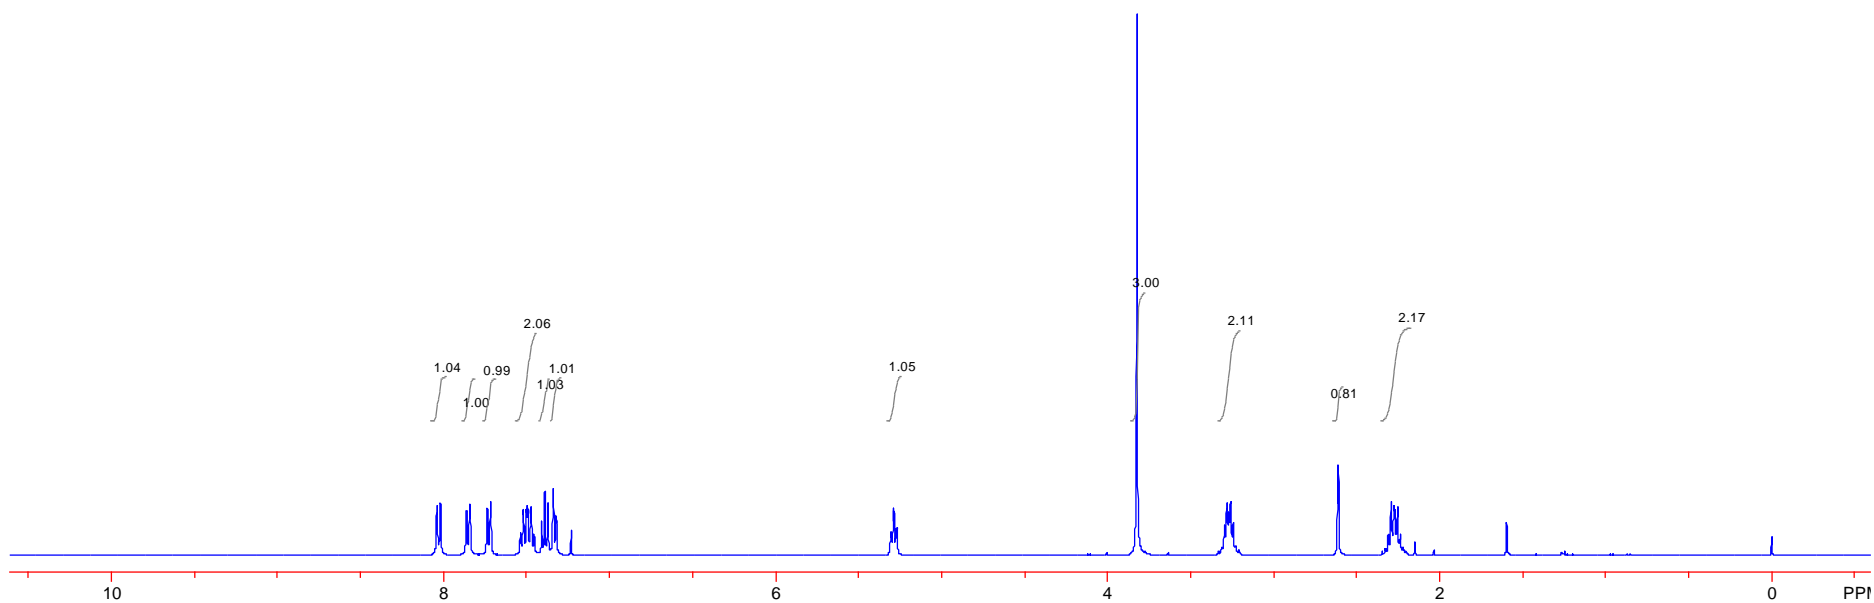

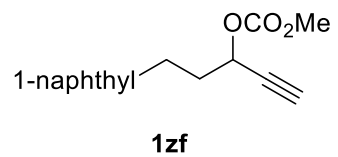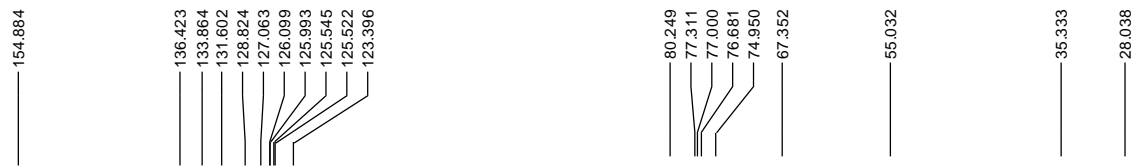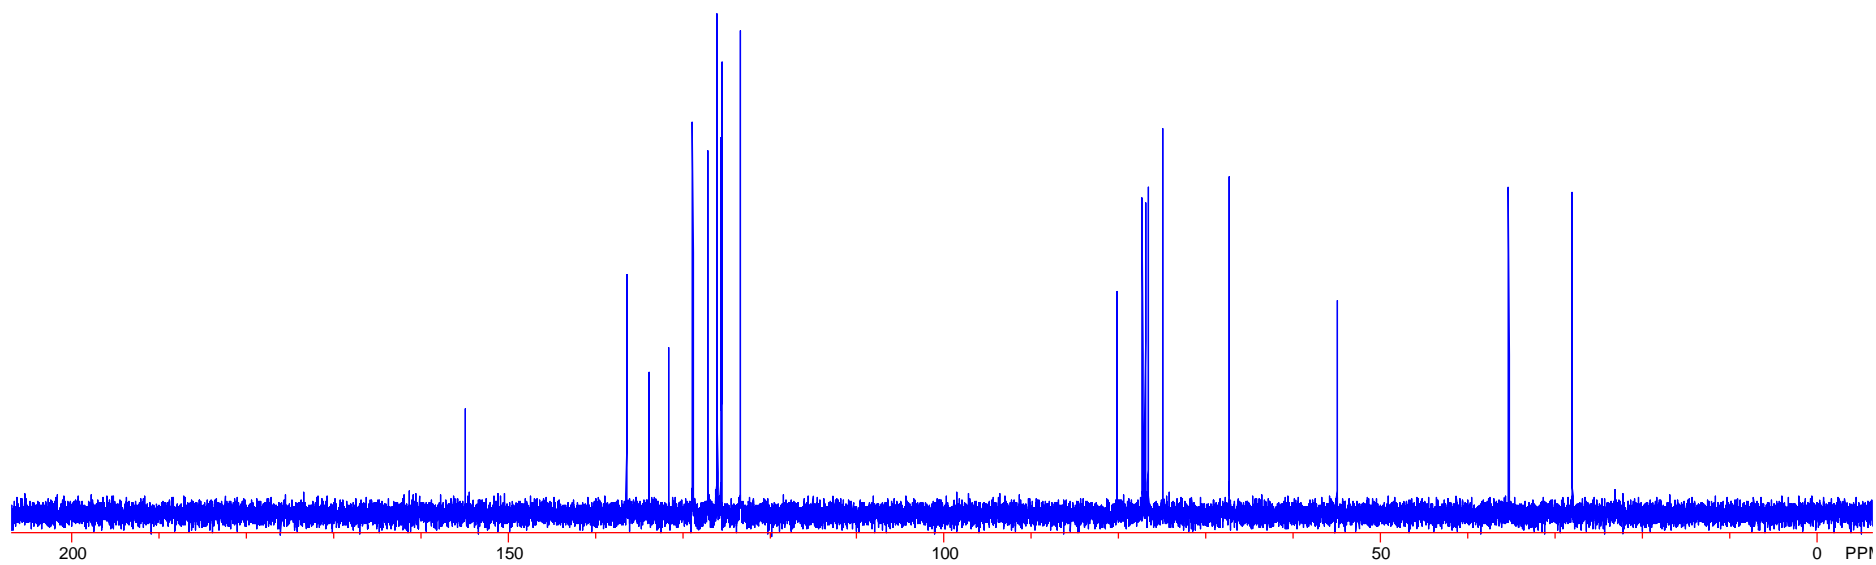

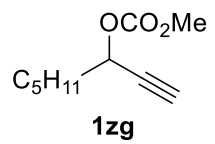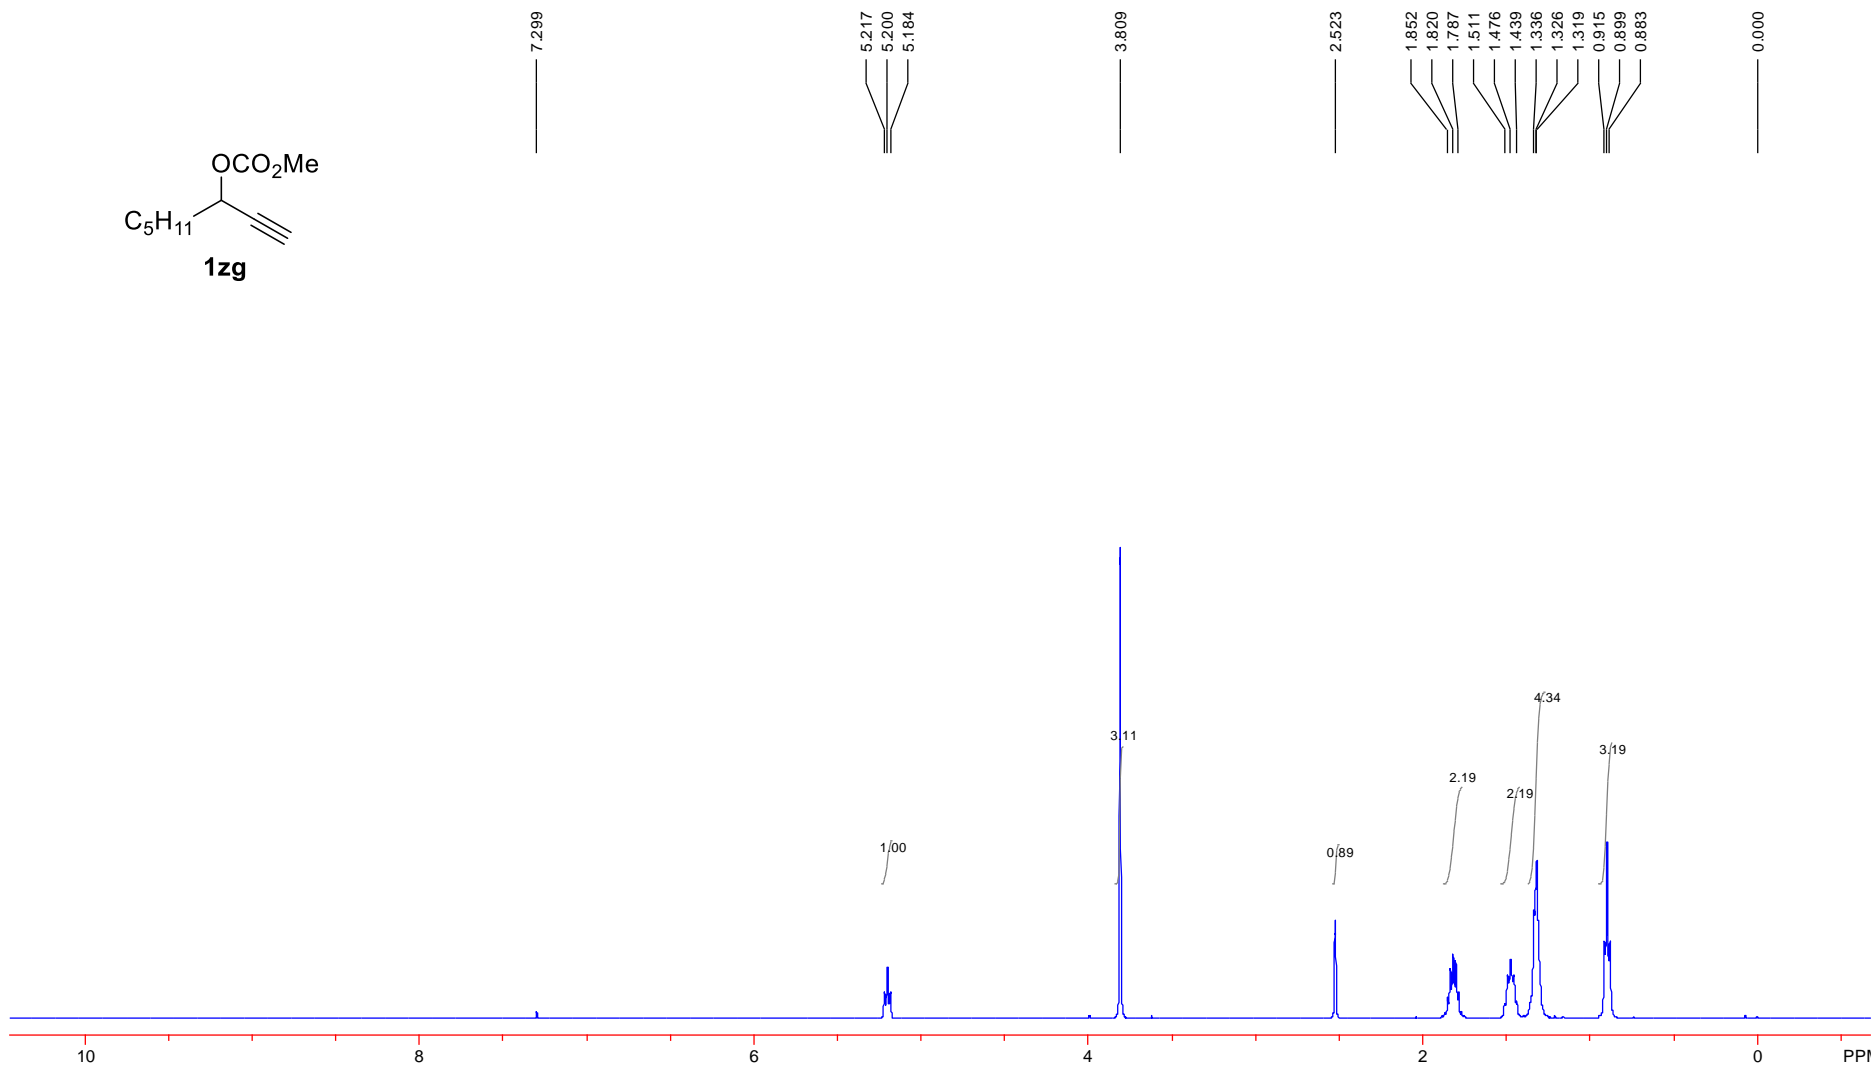

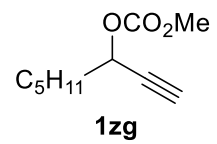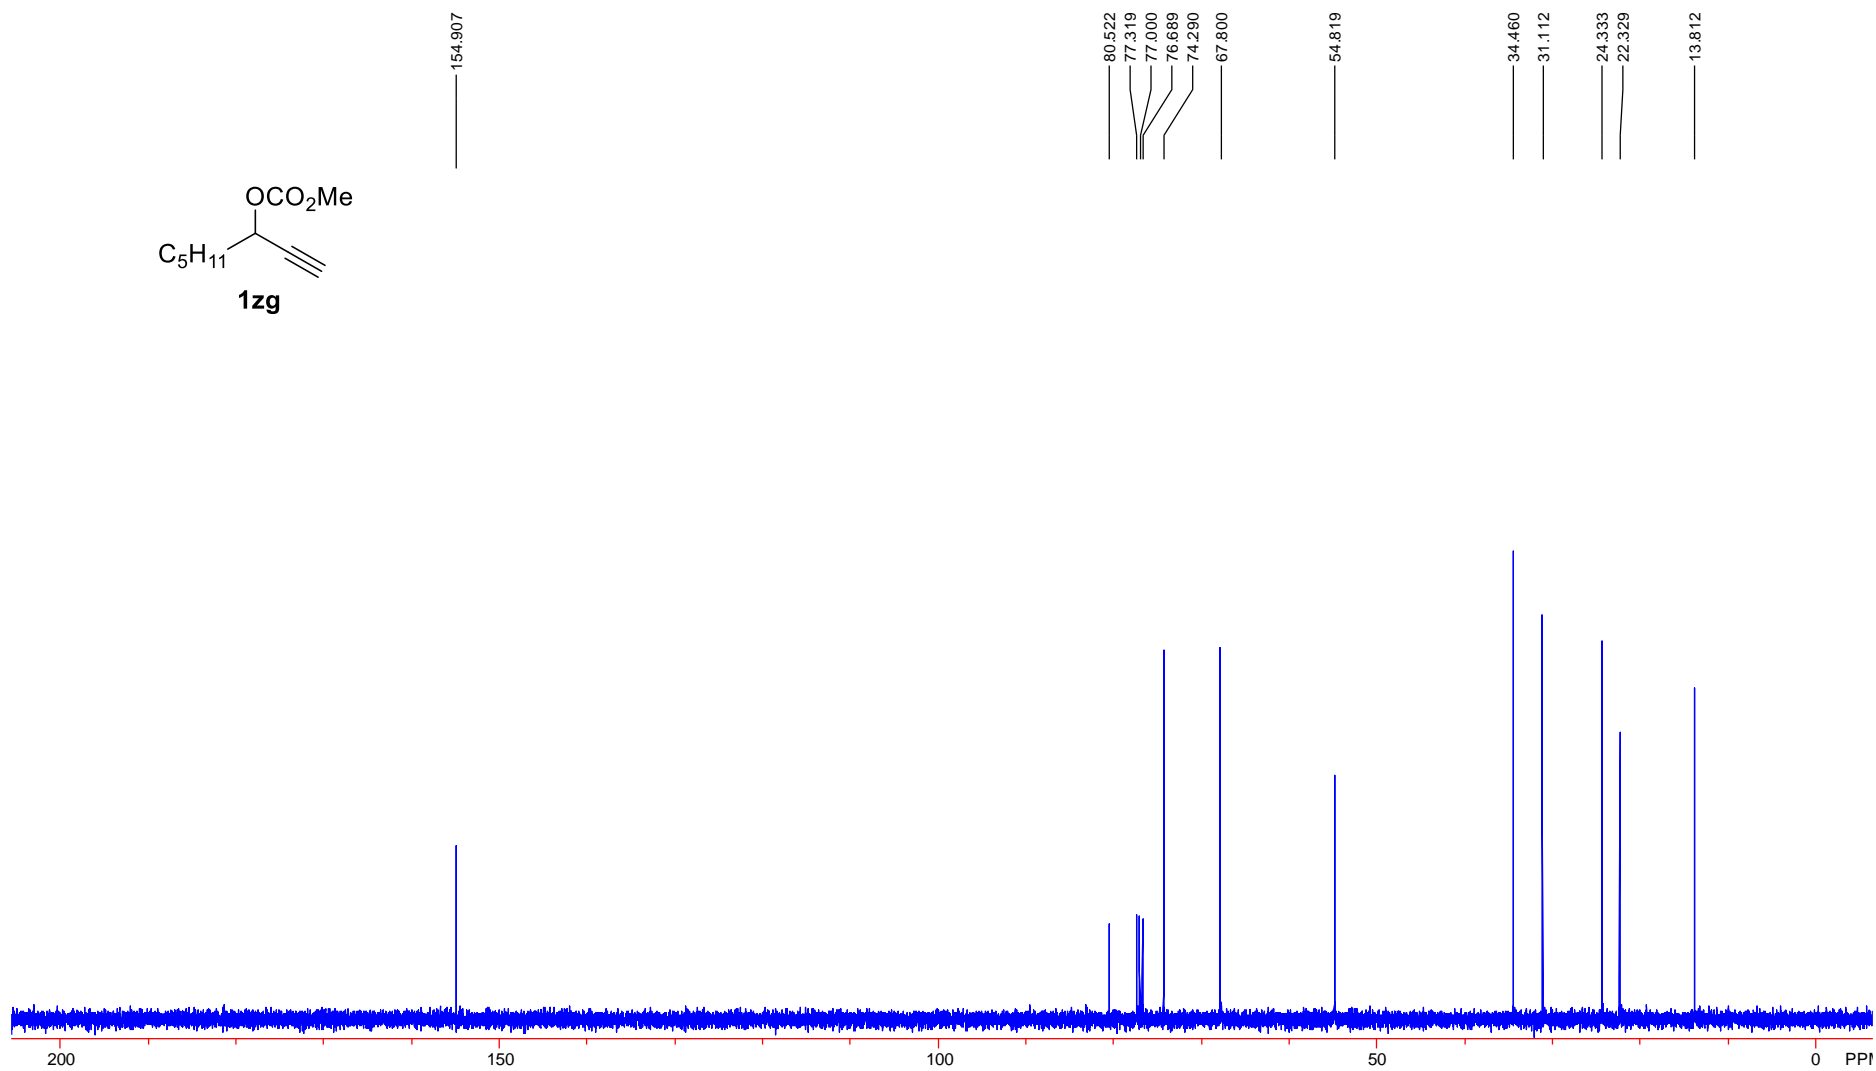



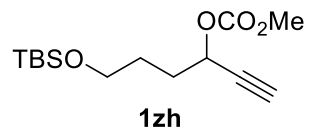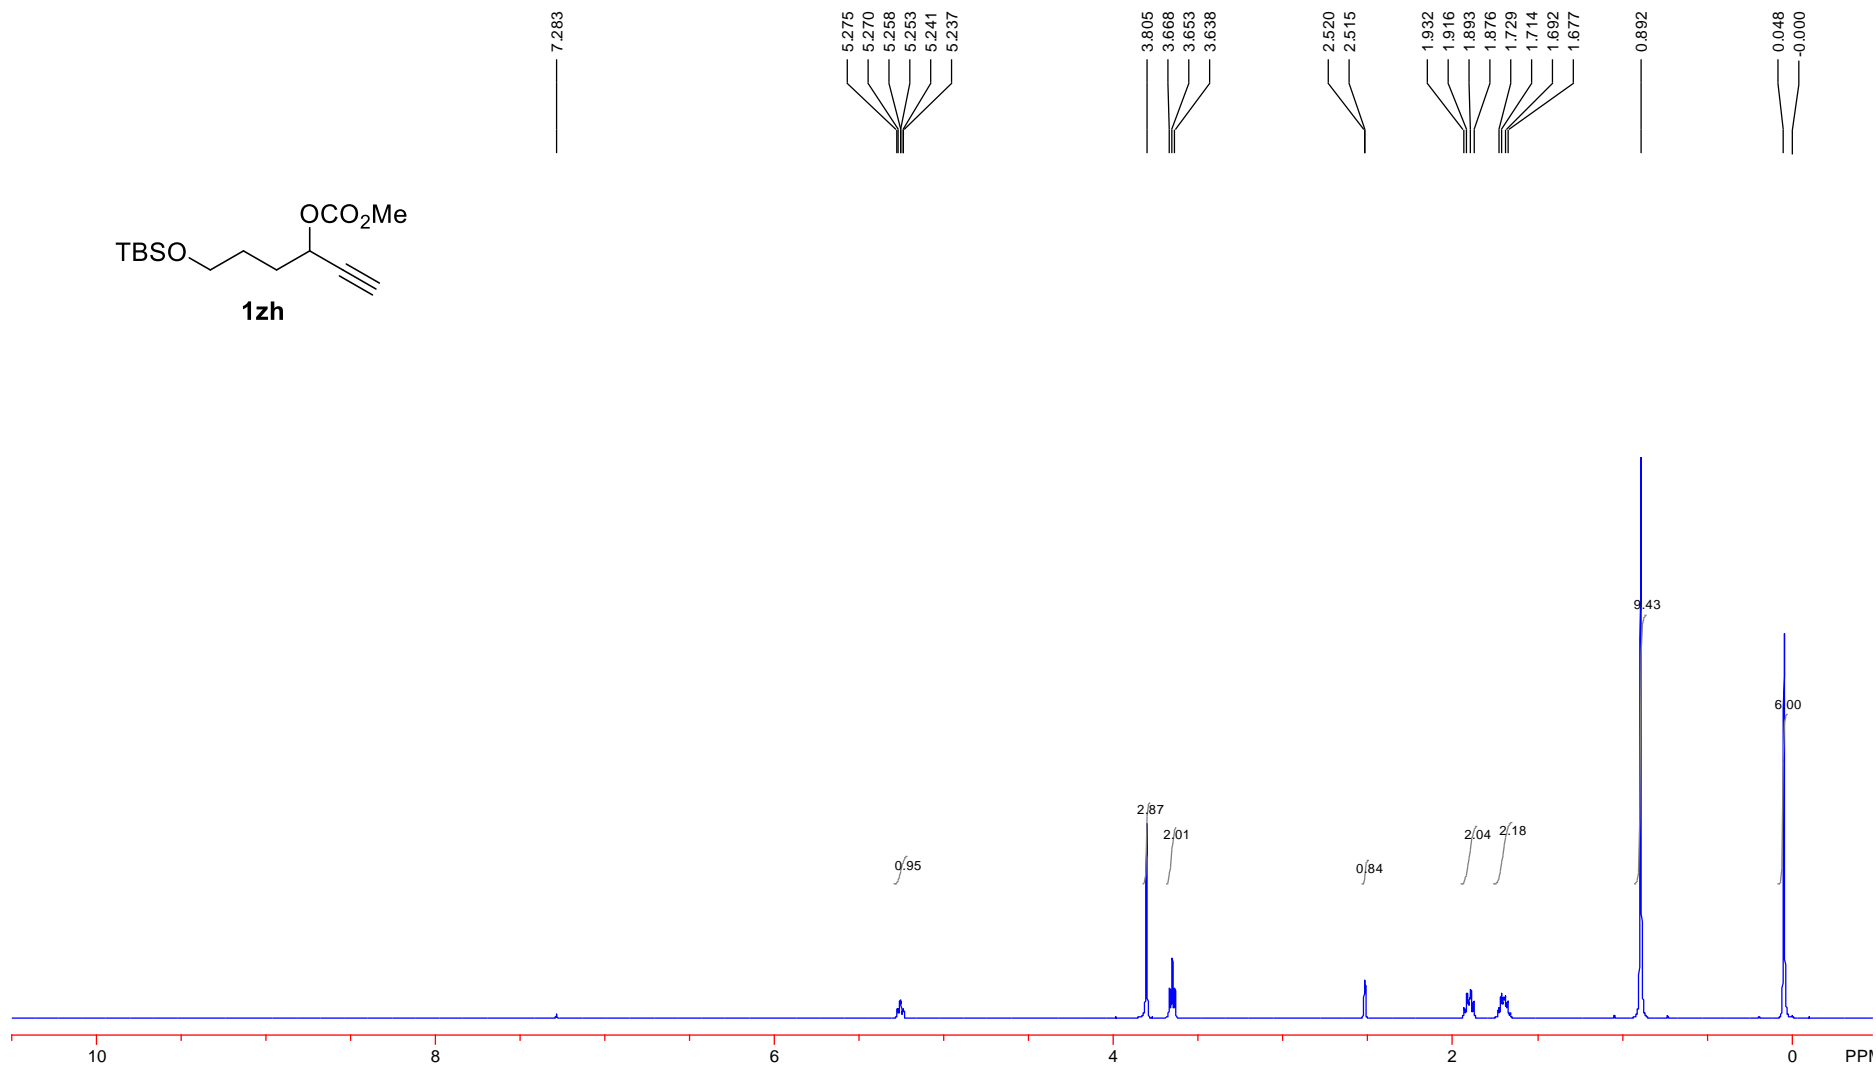

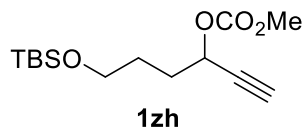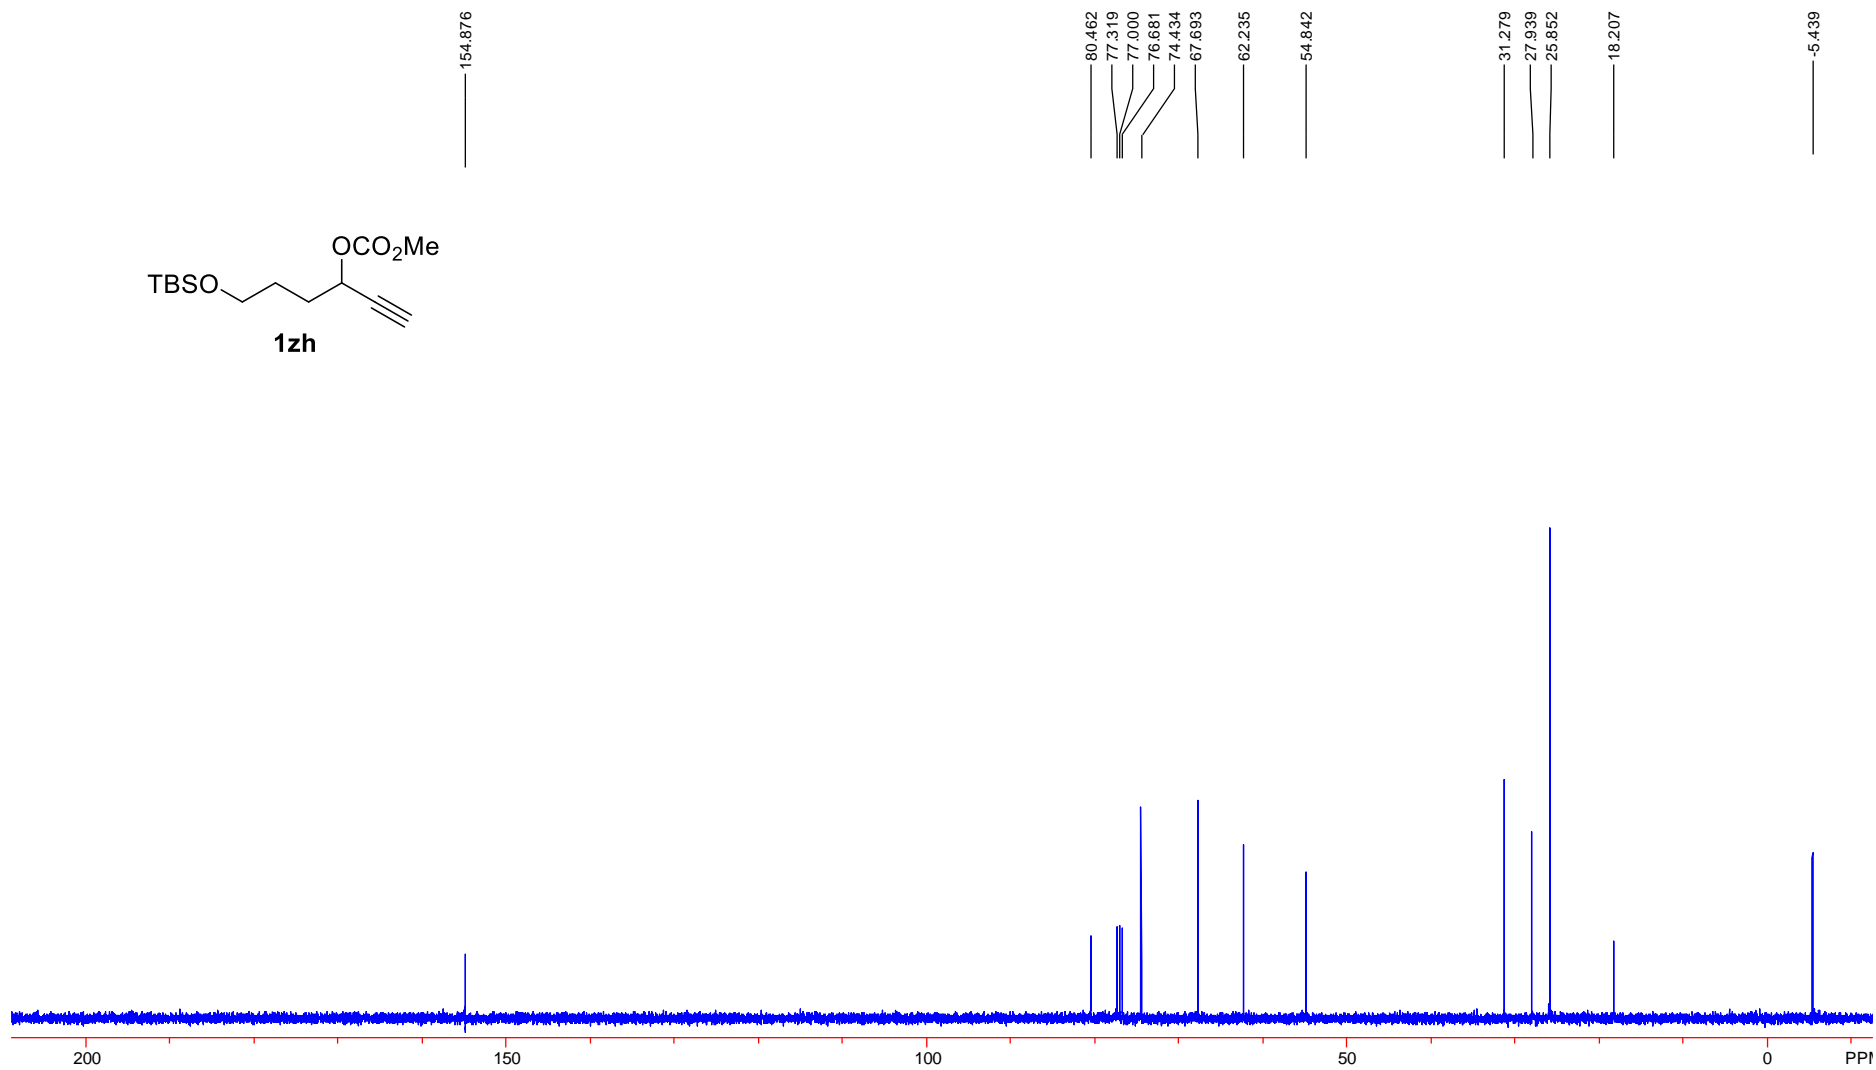

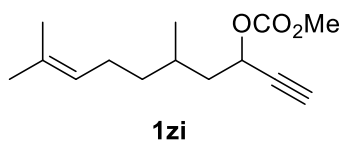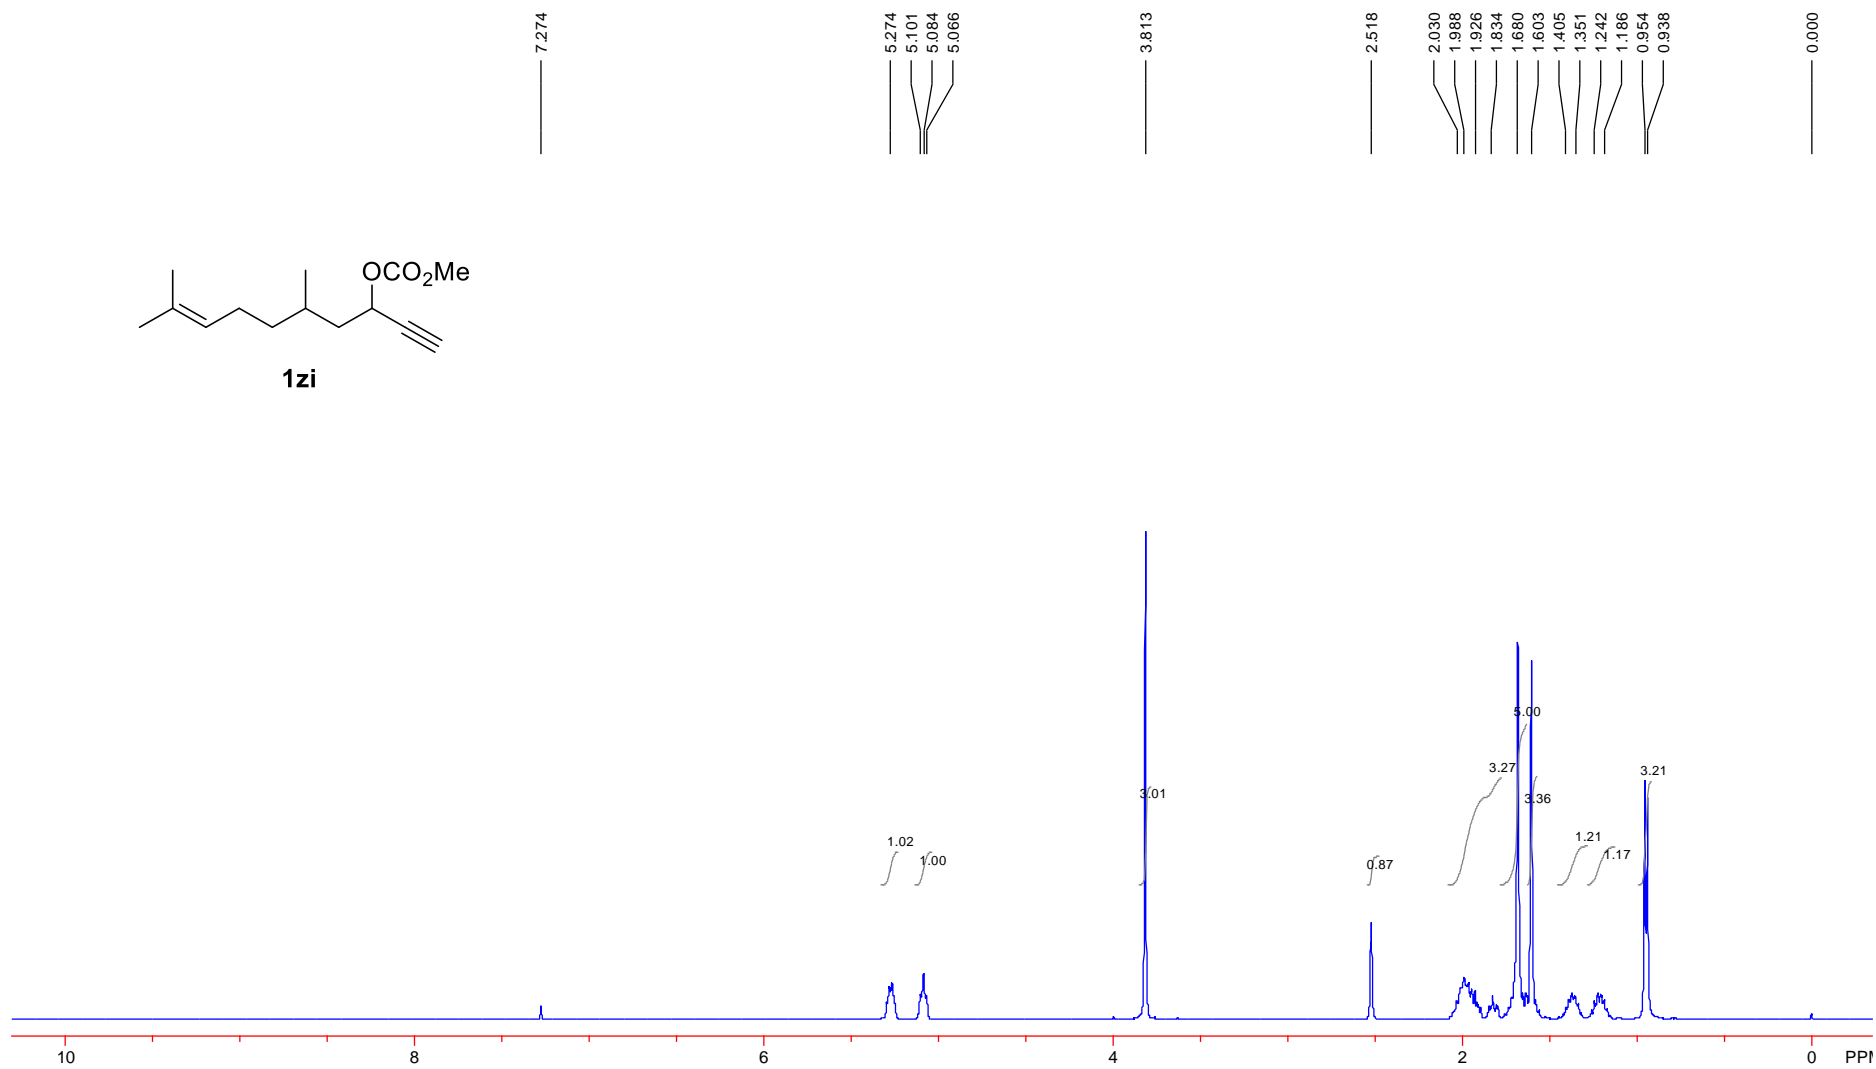

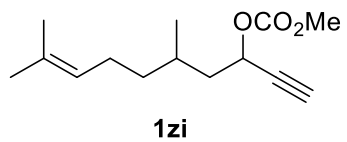

154.984  
154.889

131.430

124.277

80.914  
80.567  
77.319  
77.000  
76.722  
76.685  
74.491  
74.478  
74.204  
74.192  
66.772  
66.284  
54.911  
54.883

41.782  
41.383  
36.780  
36.723

28.973  
28.747  
25.640  
25.172  
25.144  
19.261  
19.165  
17.599  
17.583

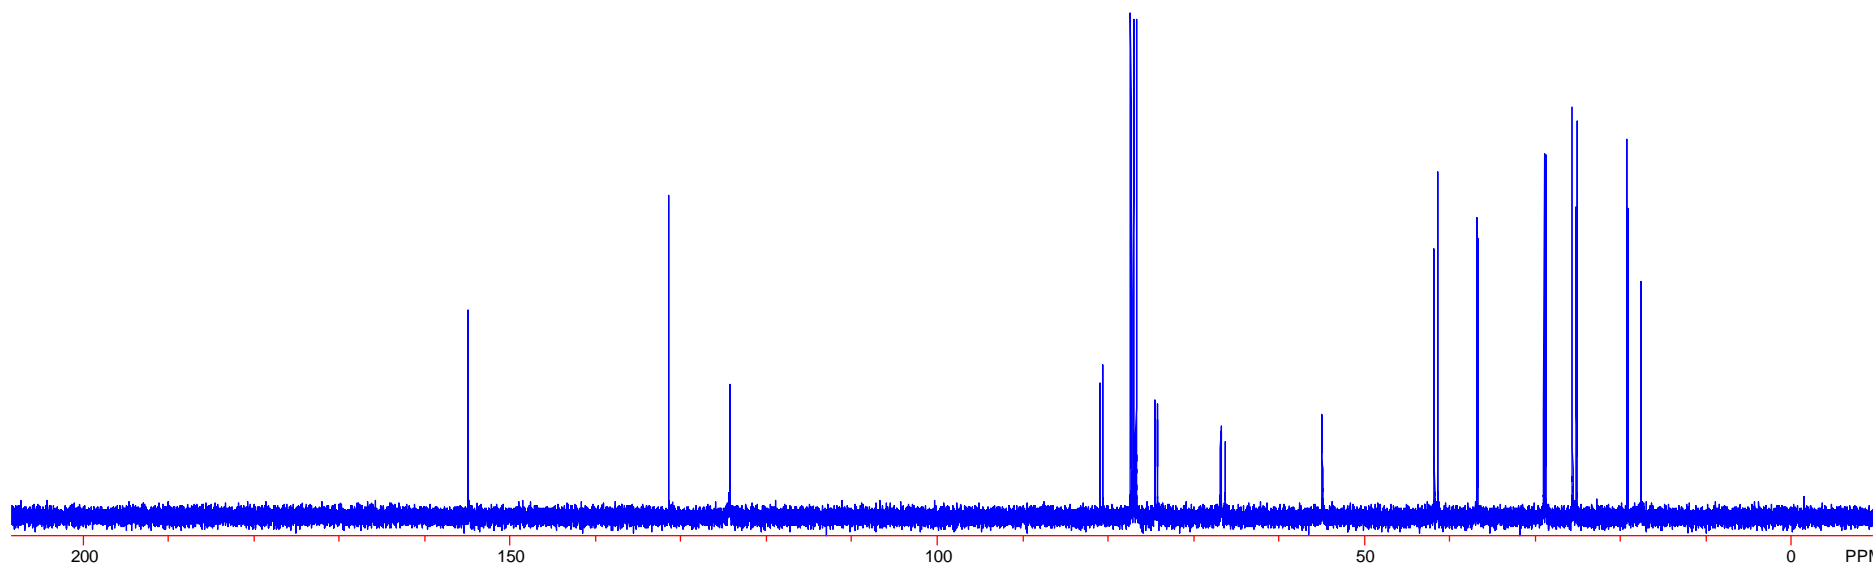

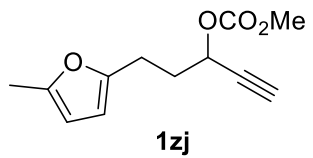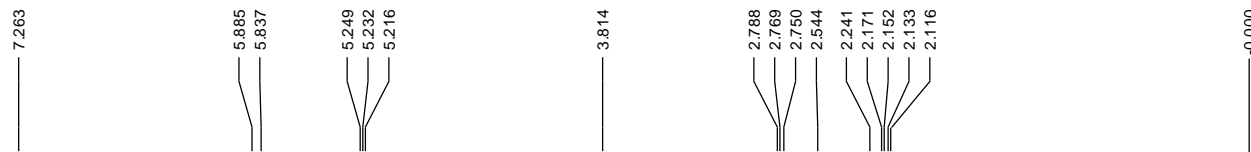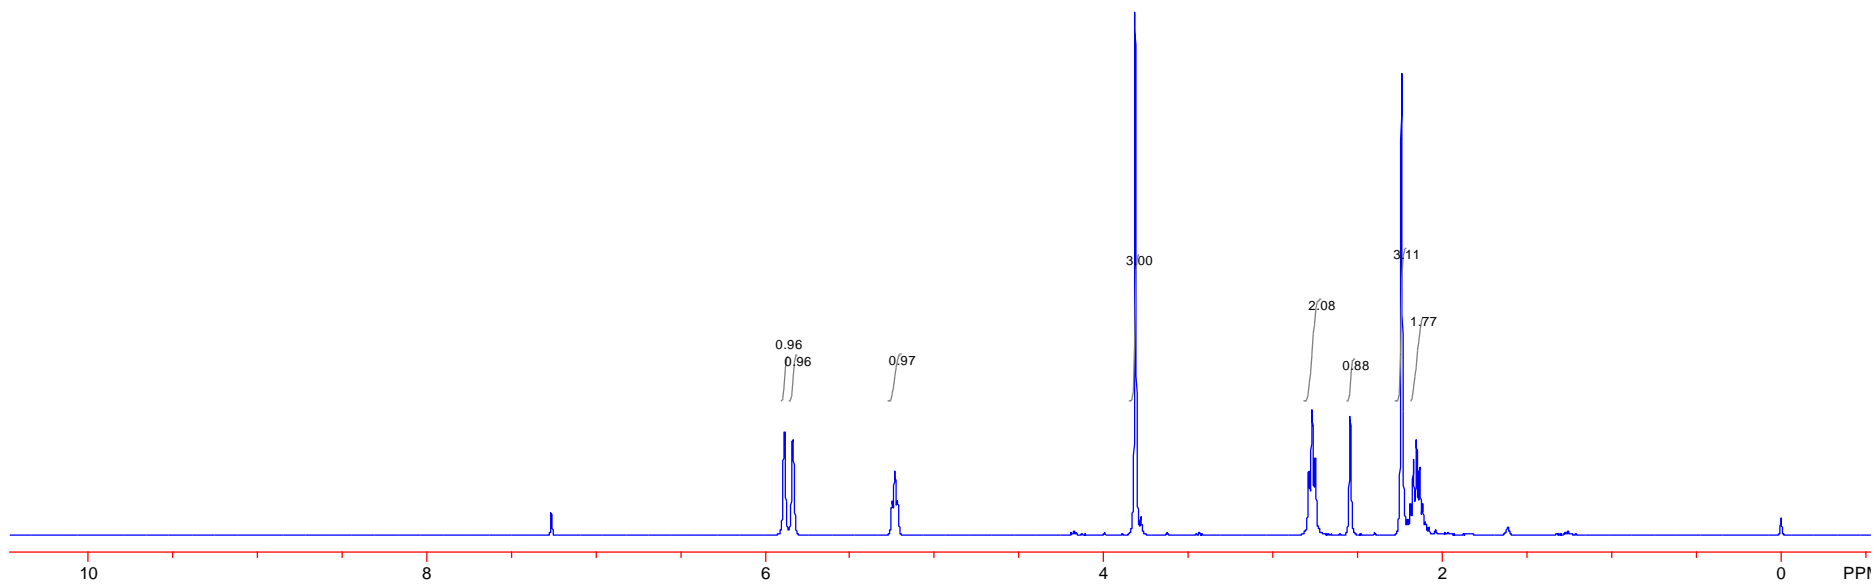

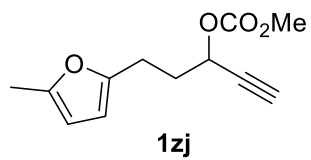

154.831  
152.022  
150.717

106.142  
105.869

80.059  
77.319  
77.000  
76.689  
74.814  
66.942

54.978

33.109

23.445

13.425

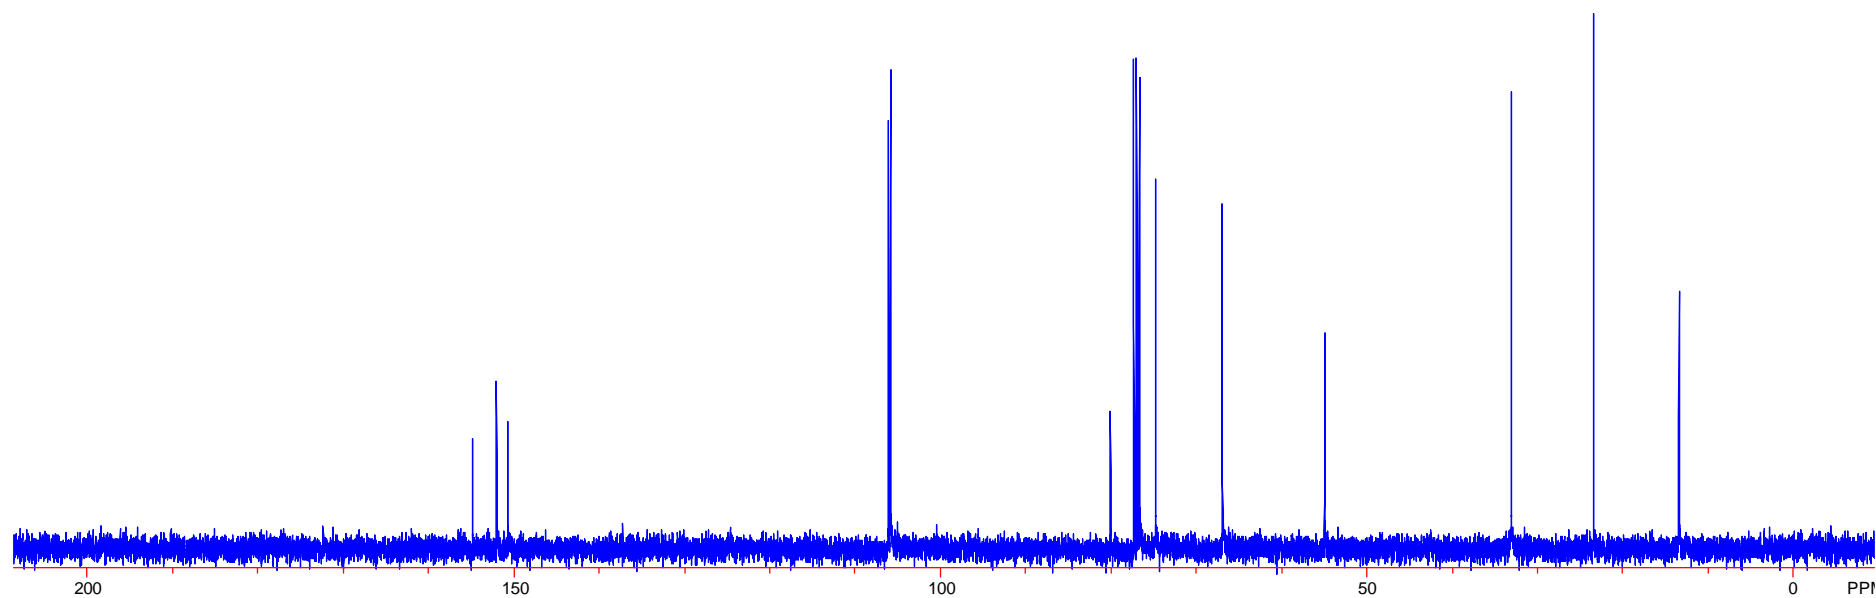

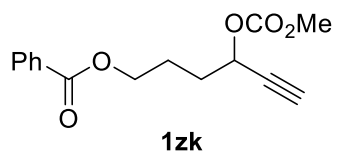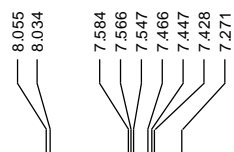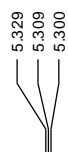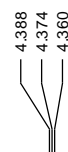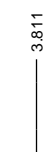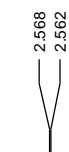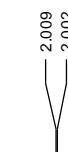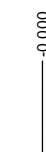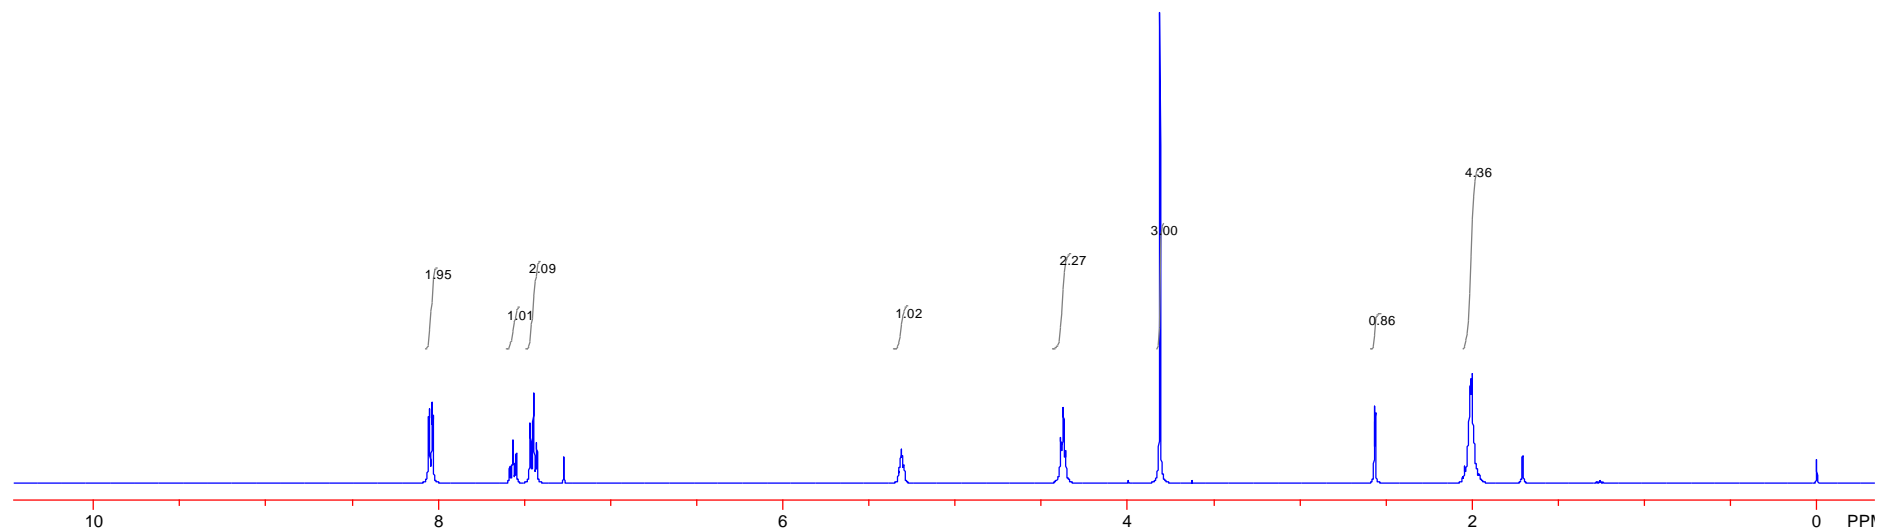

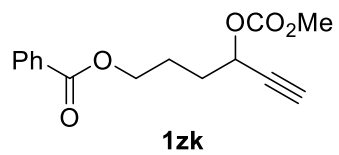

166.434

154.802

132.935

130.075

129.510

128.324

79.941

77.315

77.000

76.681

74.946

67.232

64.069

55.020

31.280

24.163

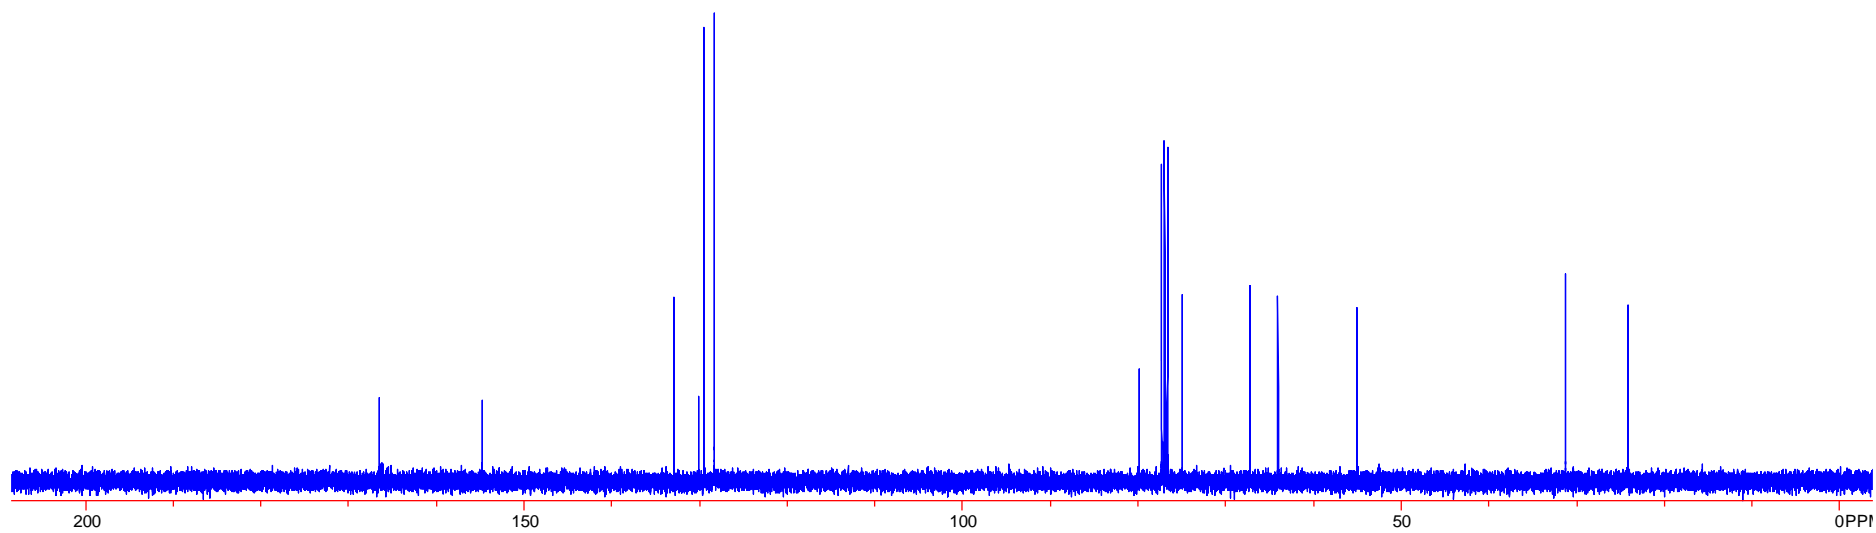



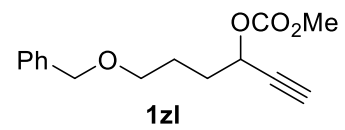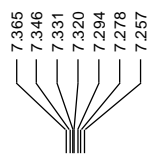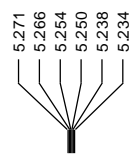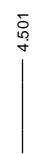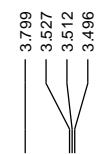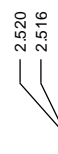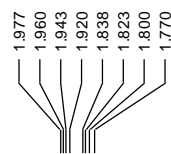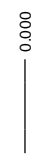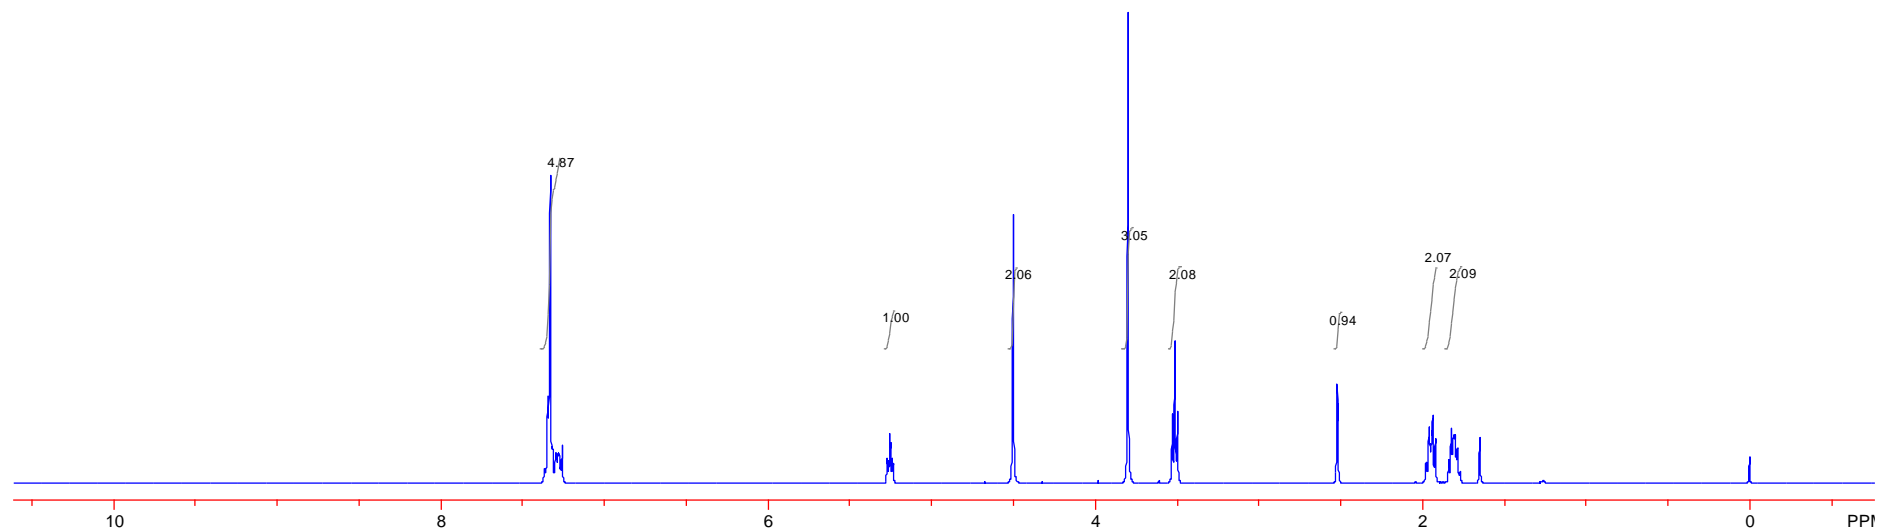

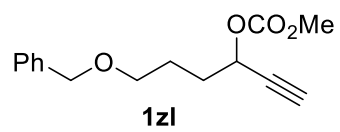

154.869

138.320

128.338

127.556

127.526

80.295

77.319

77.000

76.681

74.594

72.848

69.303

67.572

54.940

31.469

25.032

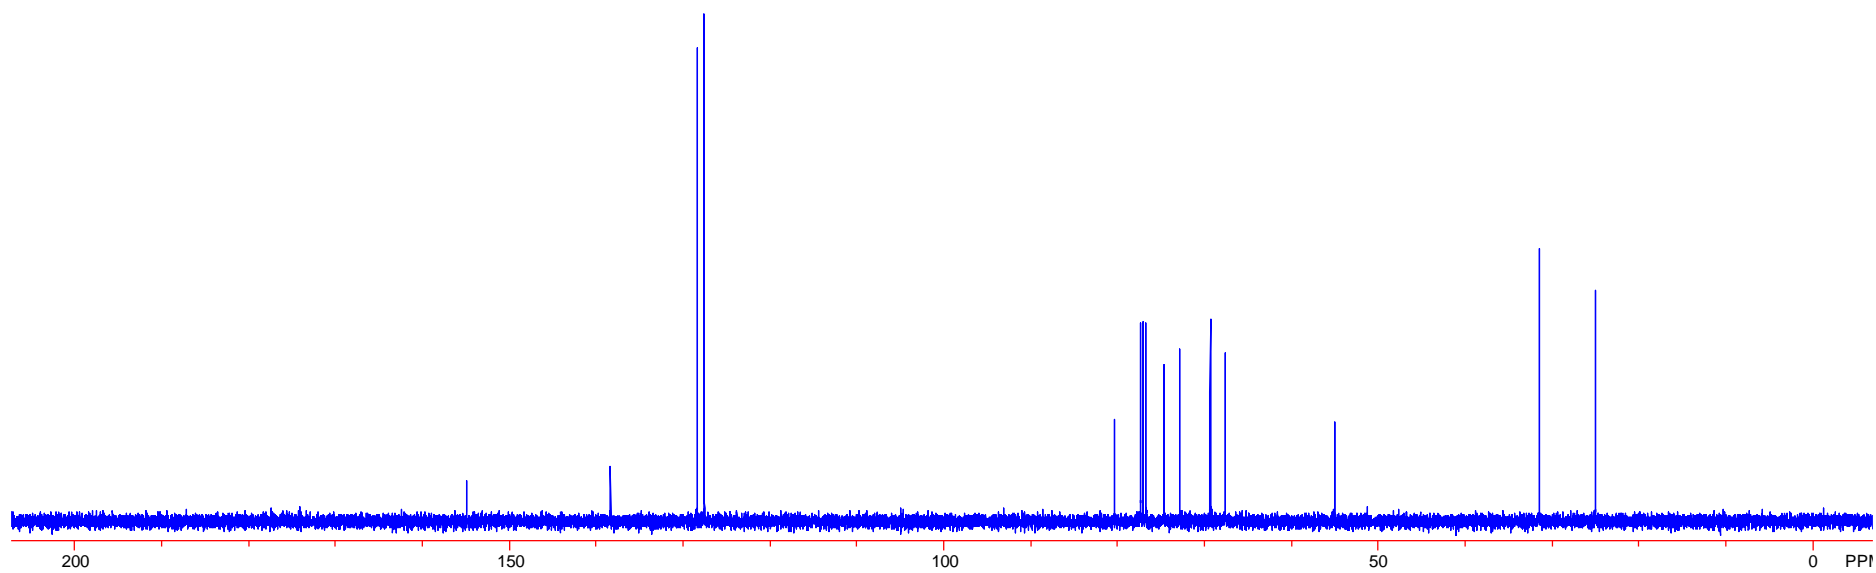

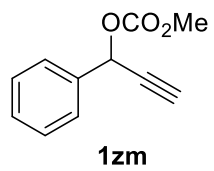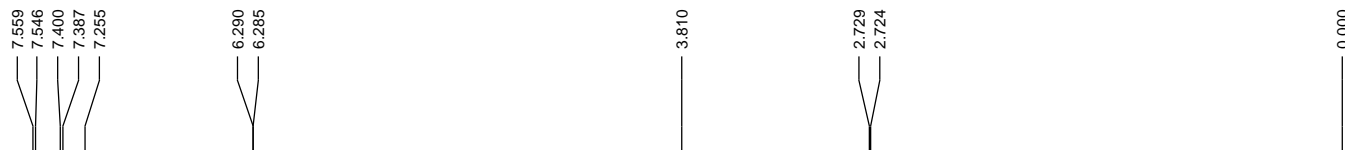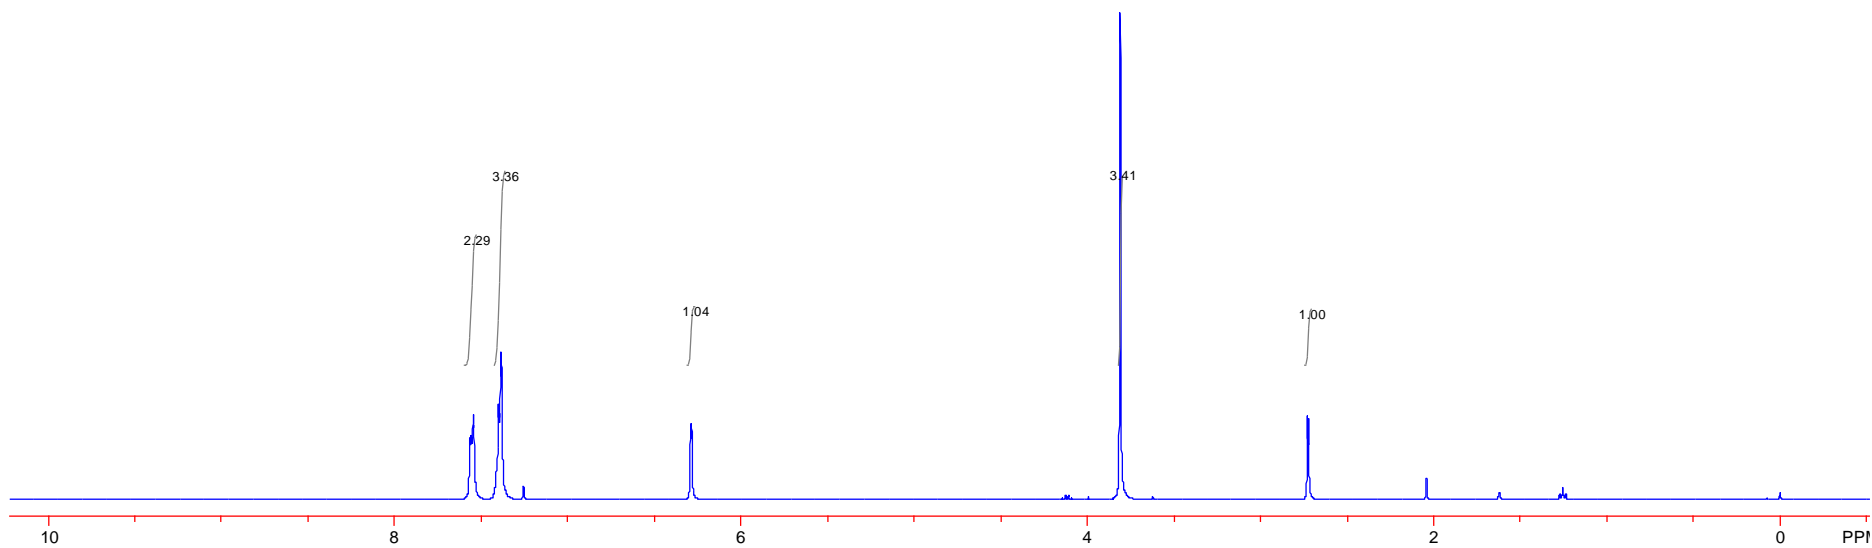

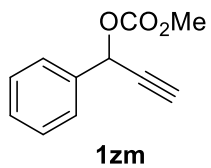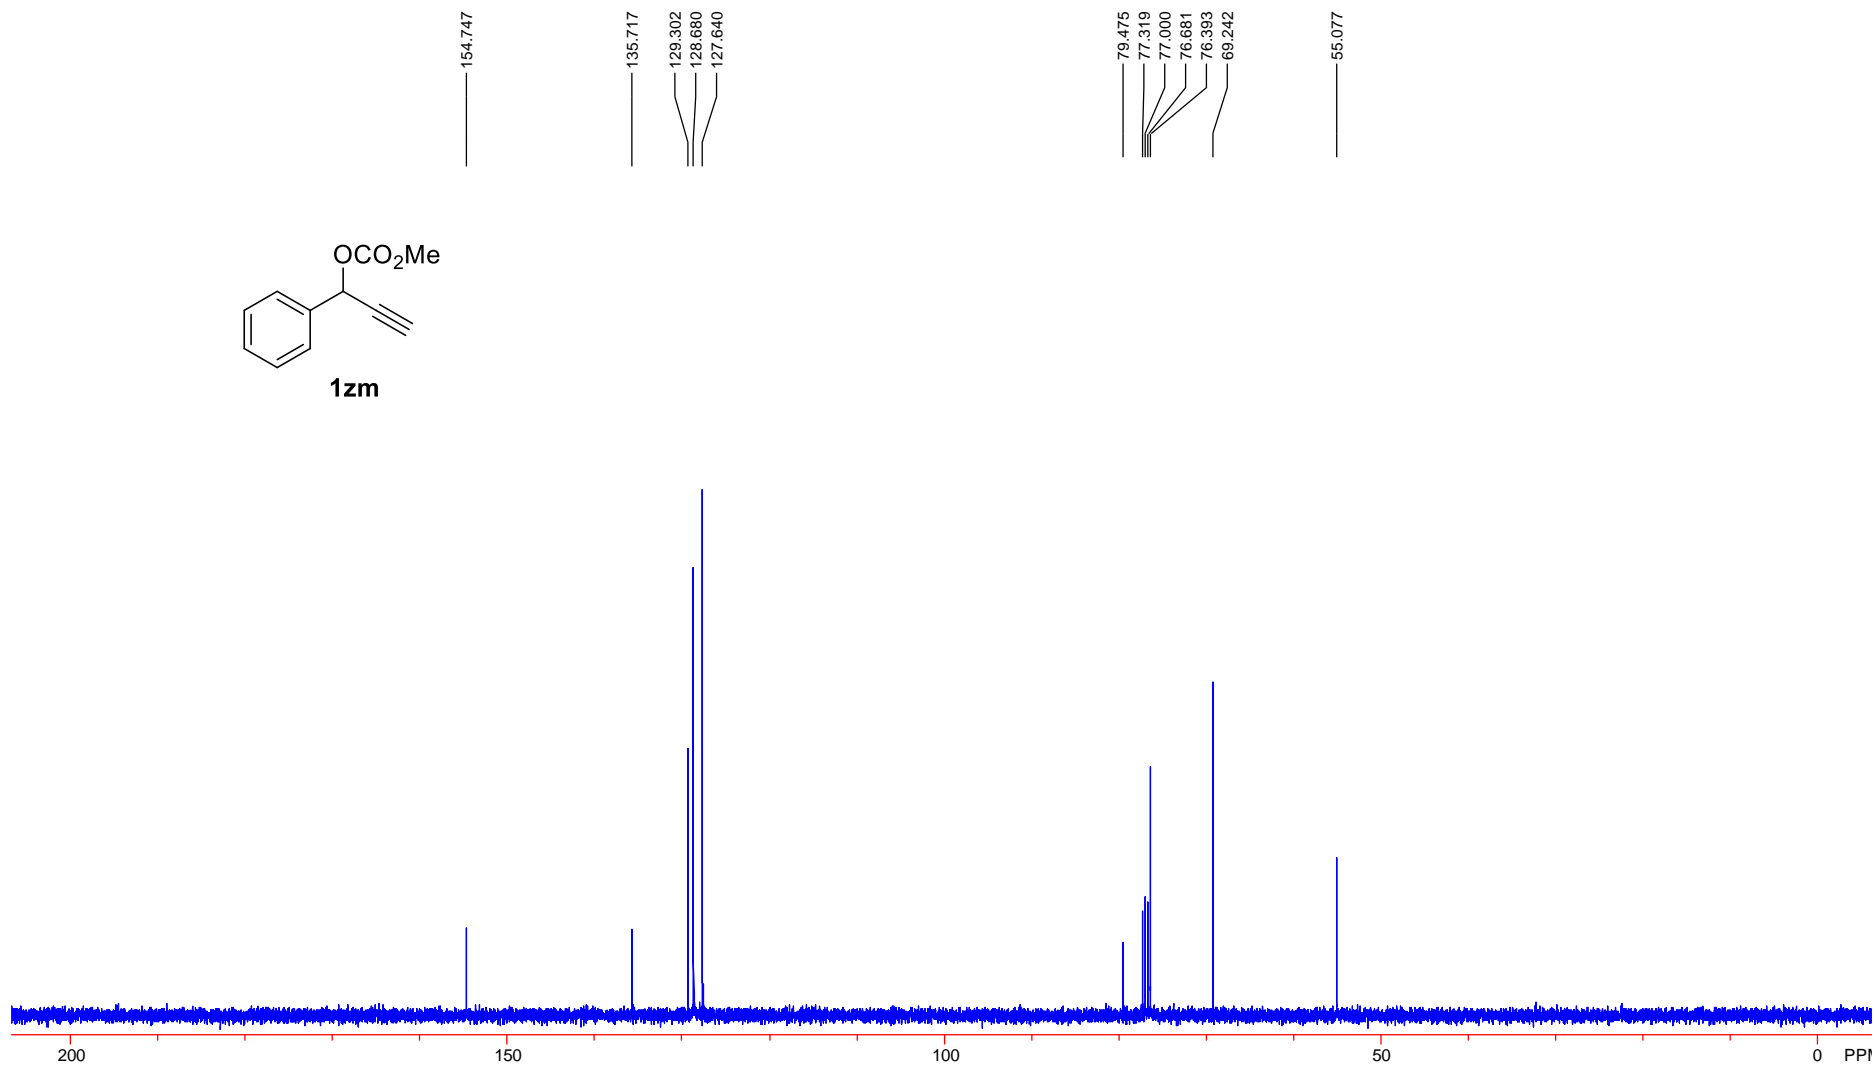

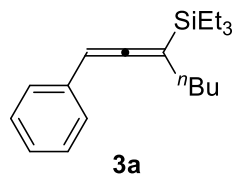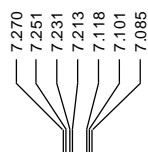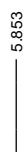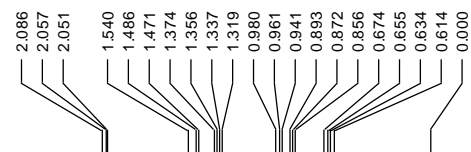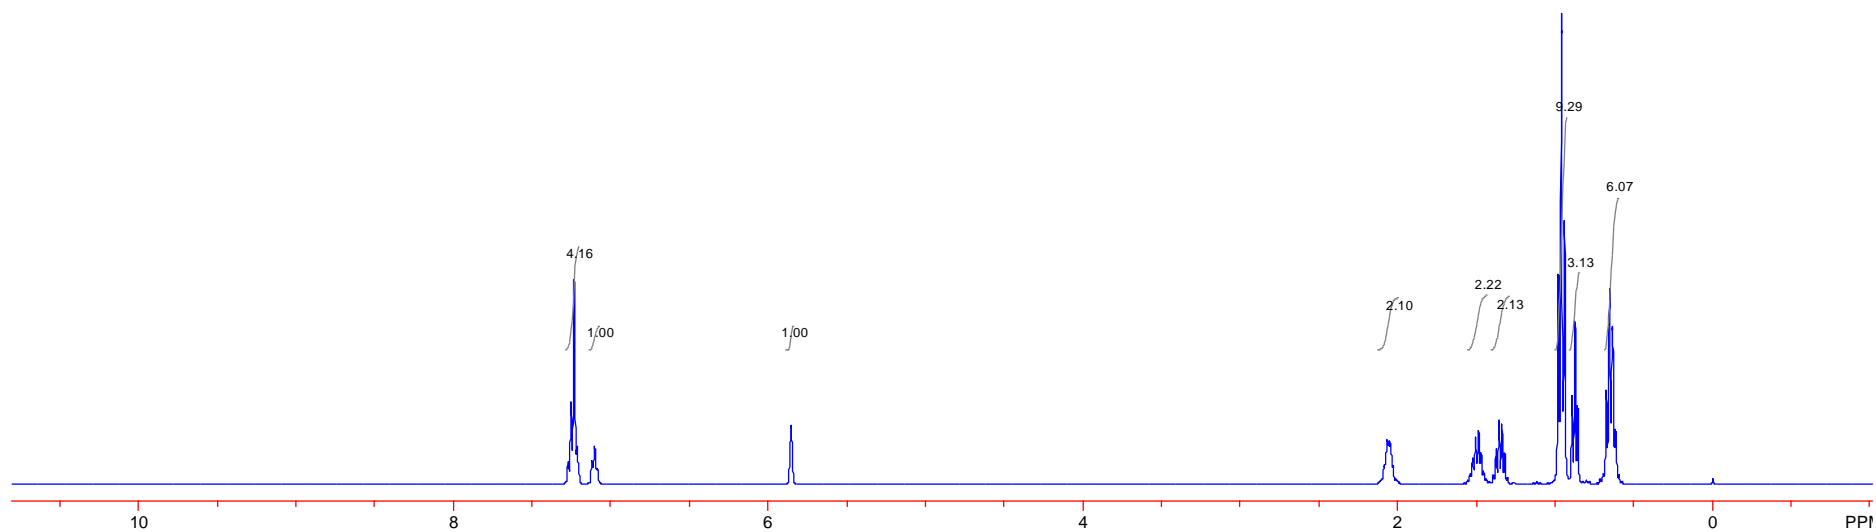

205.848

136.372

128.445

125.786

125.592

98.270

89.705

77.319

77.000

76.681

31.337

29.416

22.634

13.932

7.396

3.216

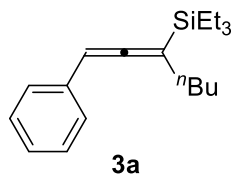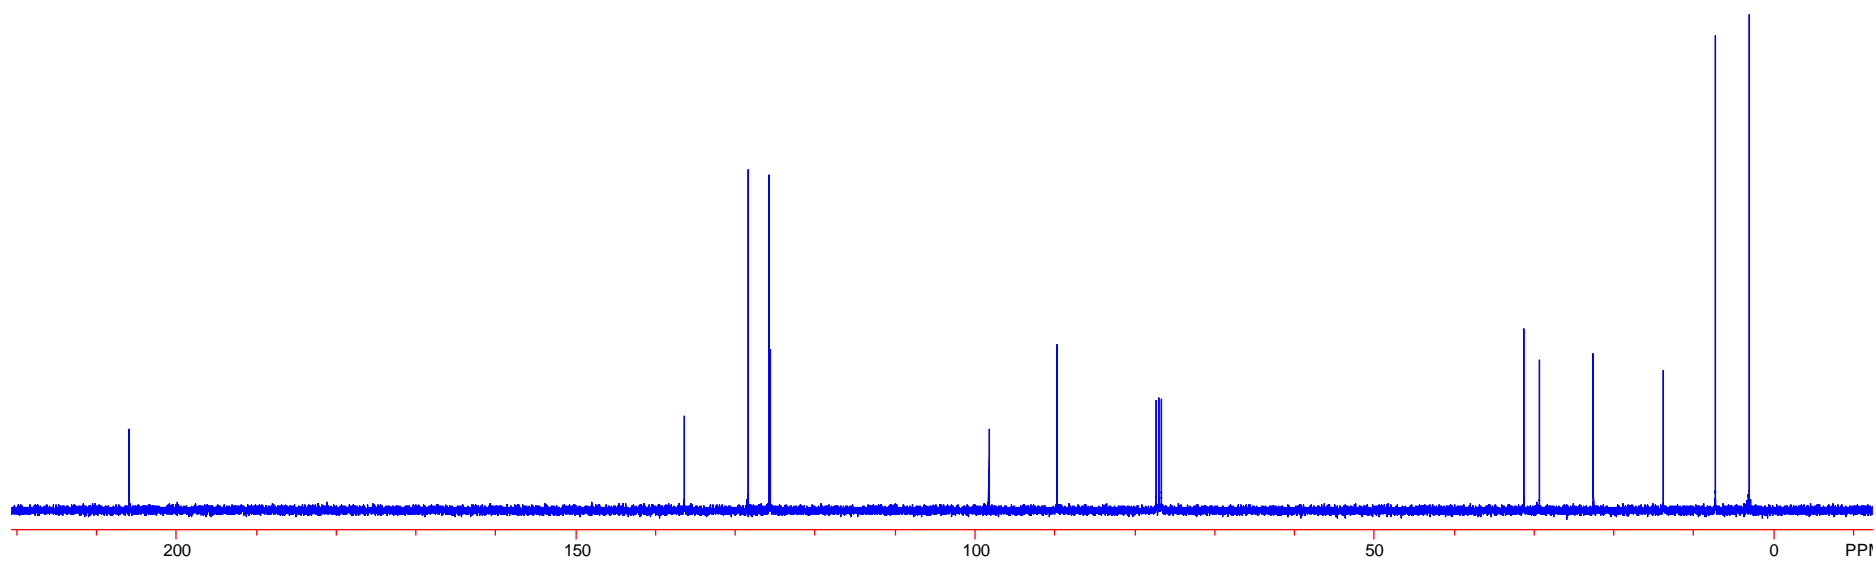

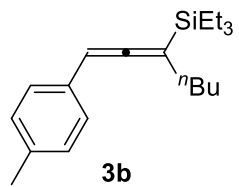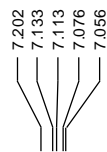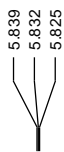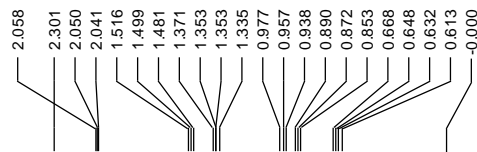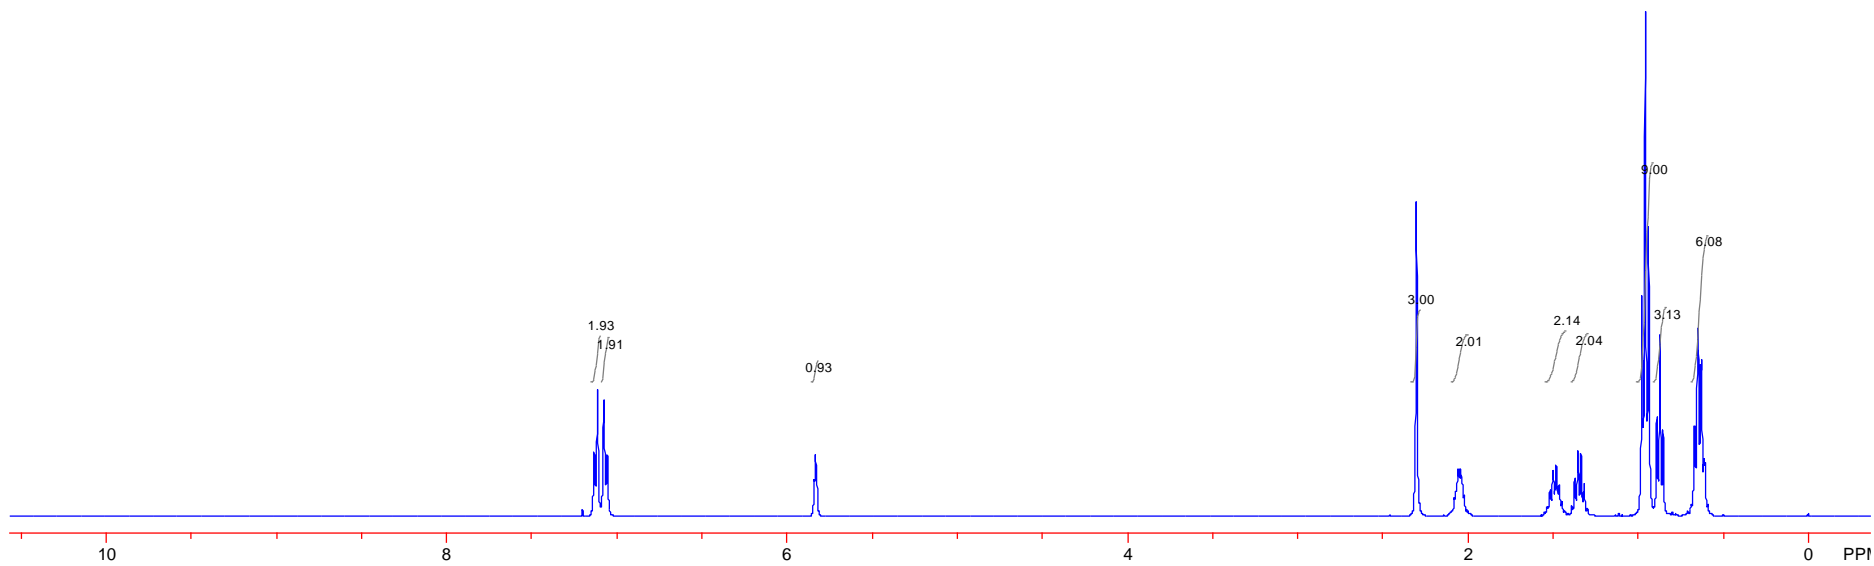

205.904

135.223  
133.302  
129.203  
125.713

98.222

89.515

77.319  
77.000  
76.681

31.349  
29.493

22.634  
21.069

13.932

7.400  
3.260

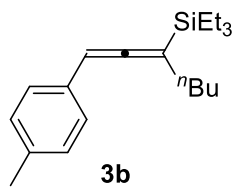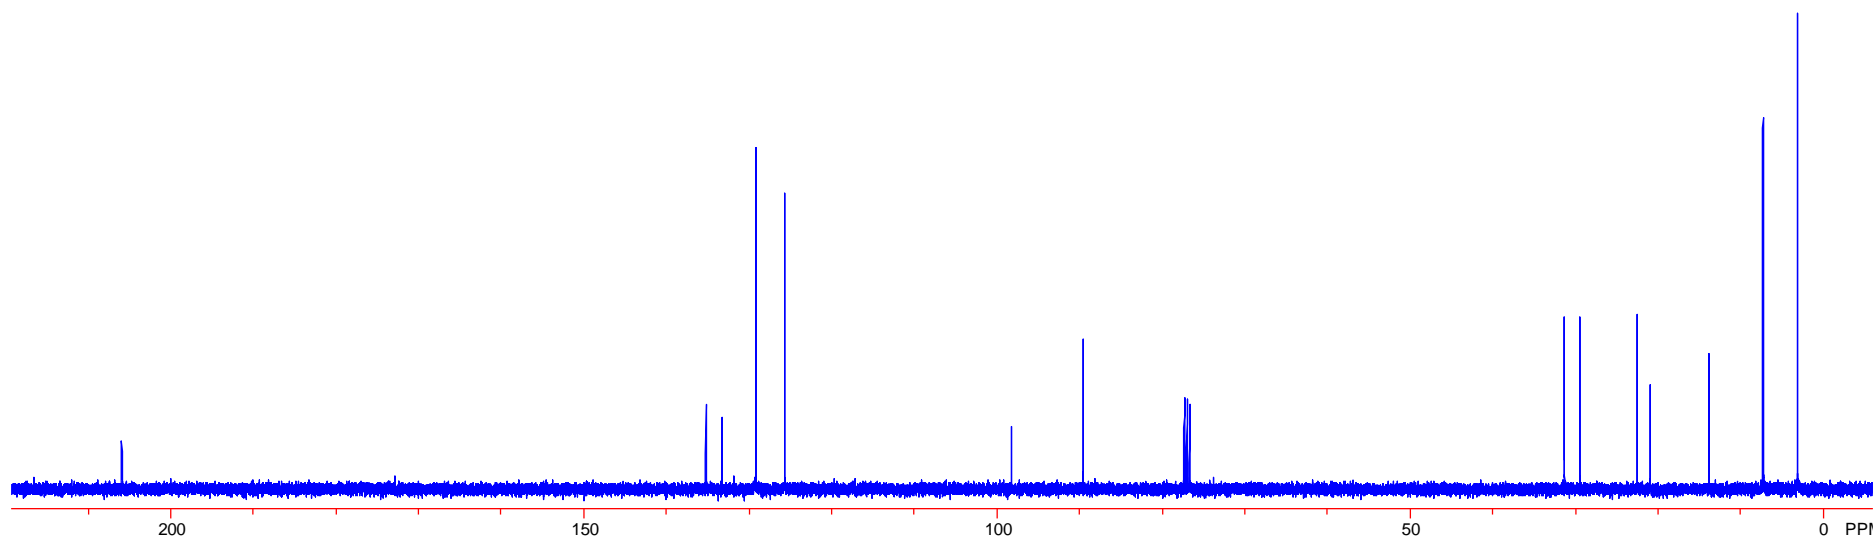



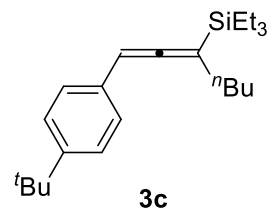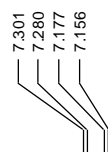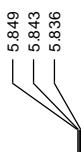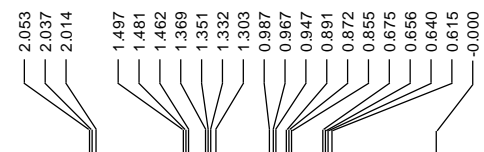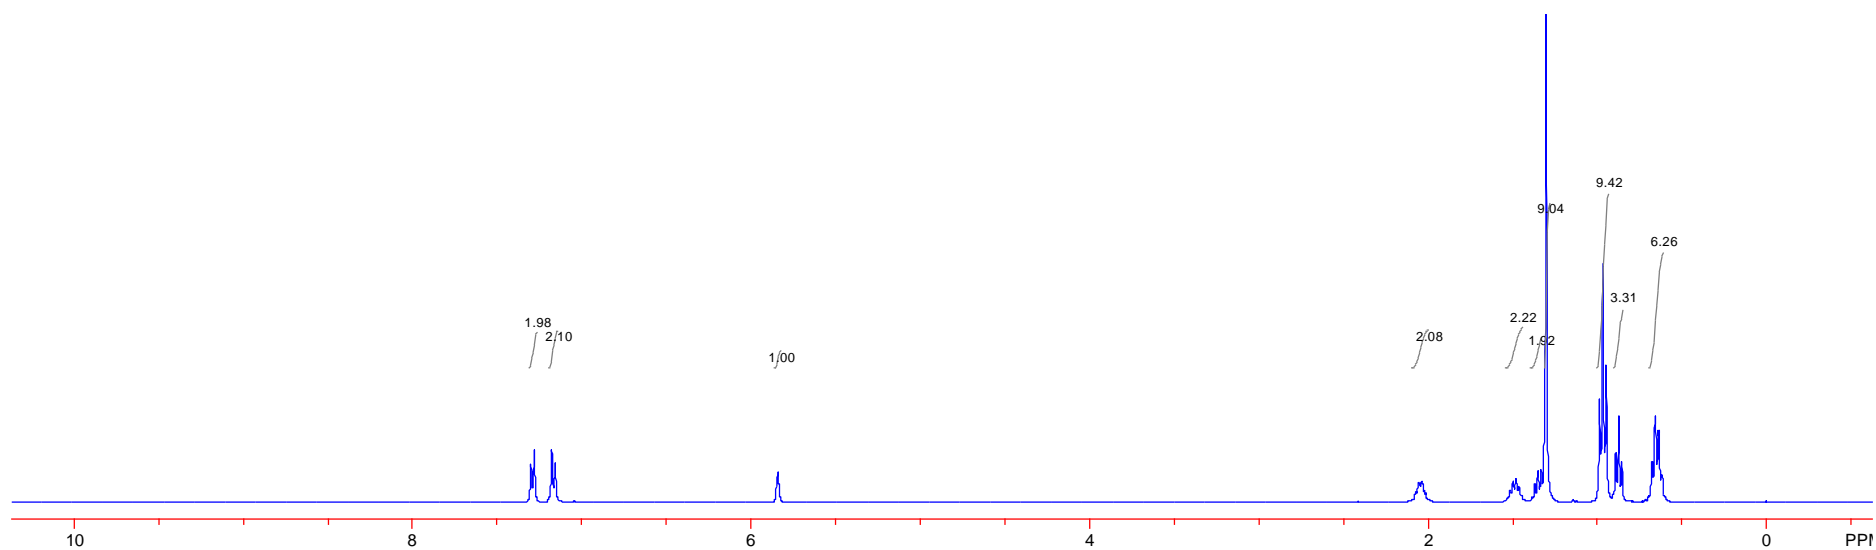

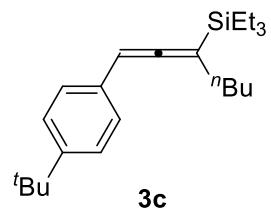

206.025

148.541

133.306

125.503

125.423

98.109

89.382

77.319

77.000

76.685

34.415

31.361

29.537

22.671

13.956

7.444

3.244

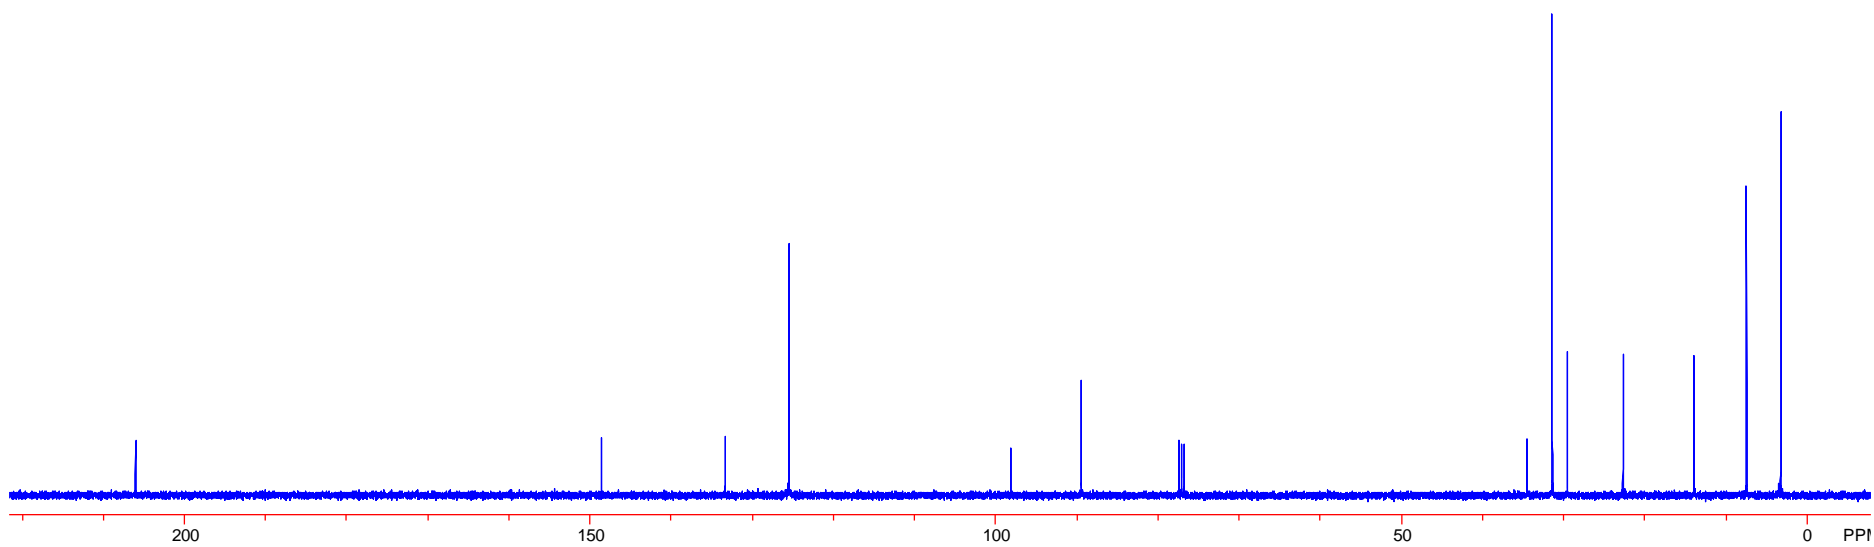

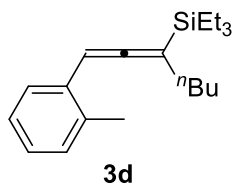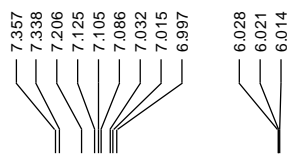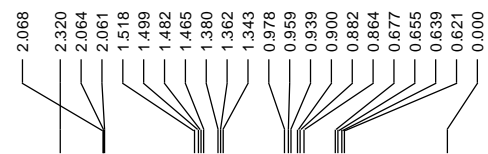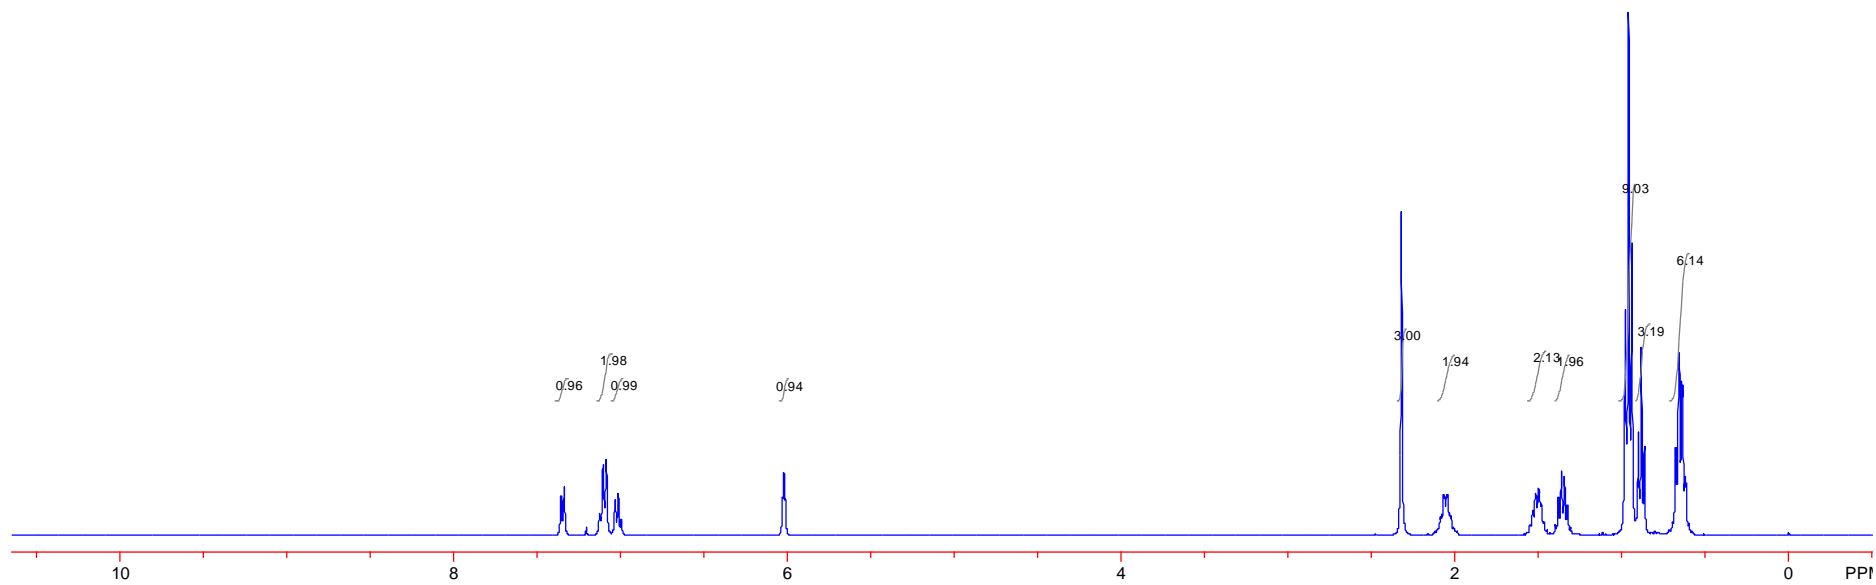

206.416

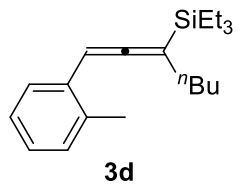

134.351  
133.823  
130.276  
126.084  
125.927  
125.447

97.148

86.562

77.315  
77.000  
76.681

31.357  
29.412

22.671  
19.842

13.940

7.408  
3.232

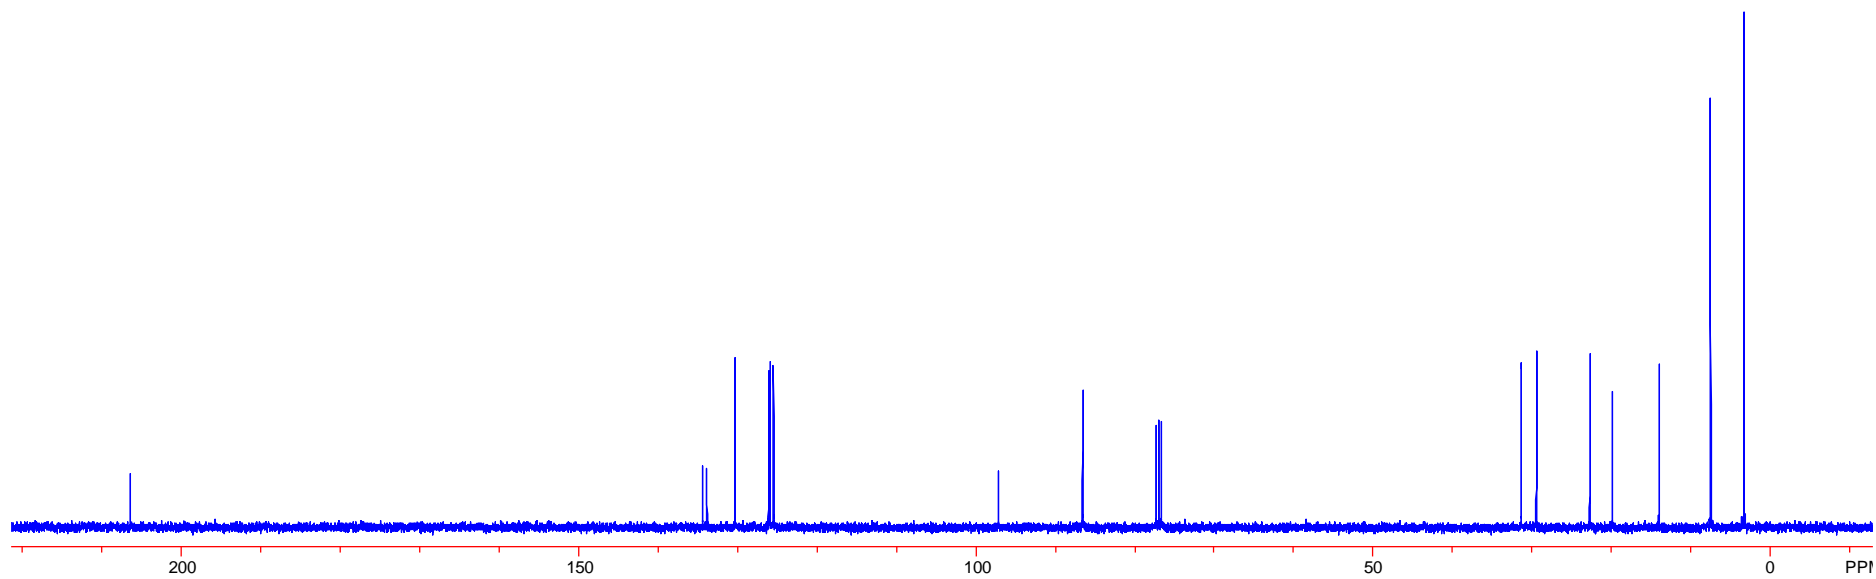

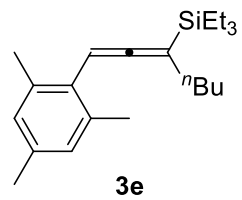

7.229  
6.820  
5.994

2.323  
2.245  
2.142  
2.124  
2.097  
2.078  
2.004  
1.984  
1.961  
1.930  
1.563  
1.544  
1.525  
1.399  
1.371  
1.335  
0.937  
0.917  
0.898  
0.645  
0.625  
0.611  
0.584  
0.000

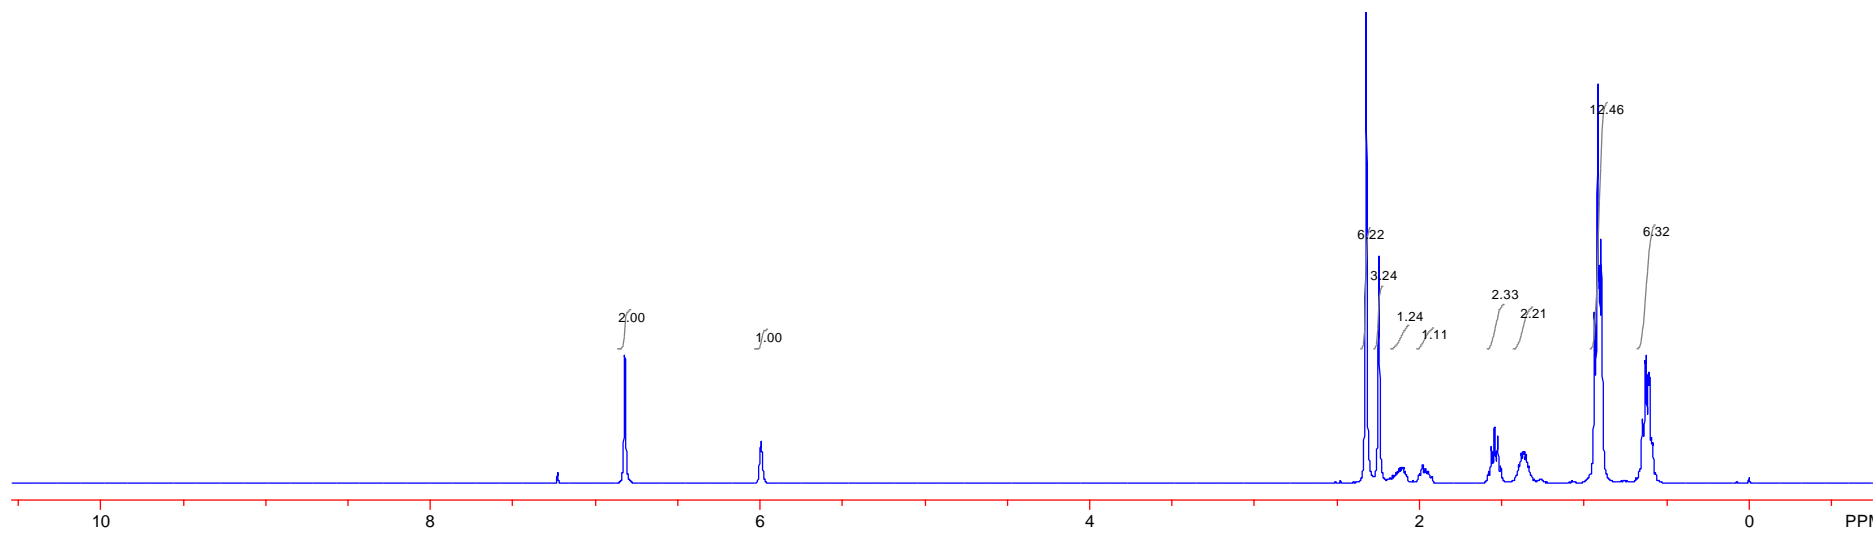



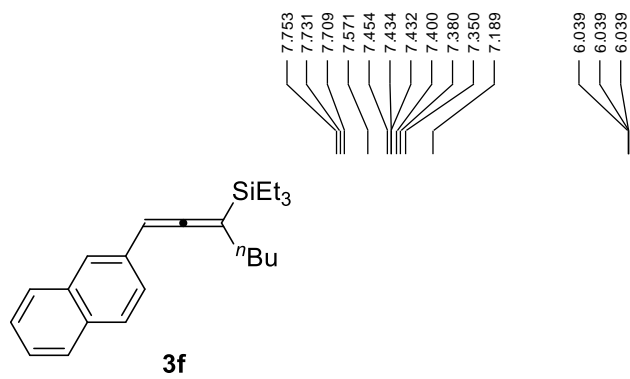

7.753  
 7.731  
 7.709  
 7.571  
 7.454  
 7.434  
 7.432  
 7.400  
 7.380  
 7.350  
 7.189

6.039  
 6.039  
 6.039

2.108  
 2.108  
 2.094

1.559  
 1.541  
 1.508  
 1.381  
 1.344  
 0.999  
 0.979  
 0.960  
 0.900  
 0.881  
 0.863  
 0.695  
 0.675  
 0.660  
 0.641  
 -0.000

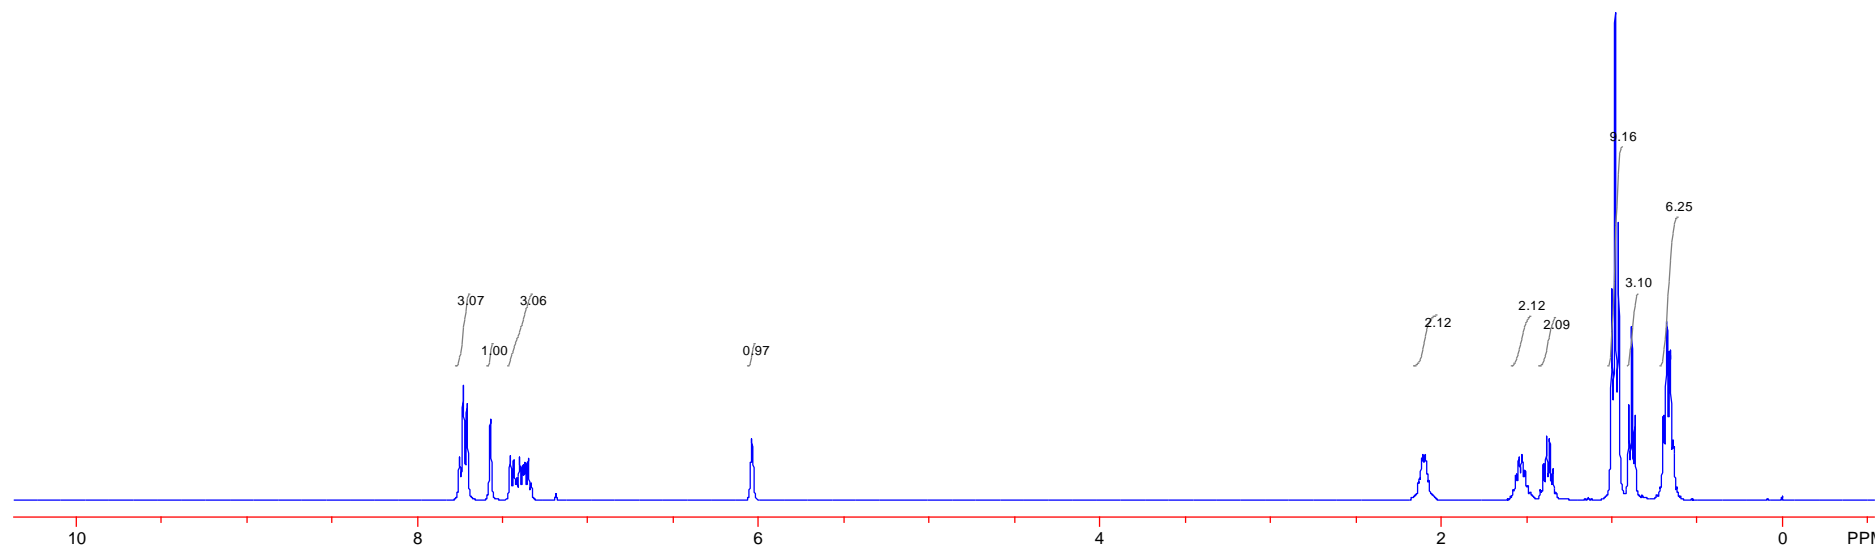

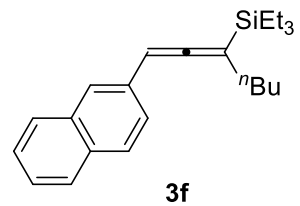

206.319

133.948  
133.879  
132.096  
127.989  
127.642  
127.379  
126.020  
124.934  
124.410  
123.813

98.528

90.108

77.319  
77.000  
76.685

31.349  
29.437

22.646

13.960

7.428

3.248

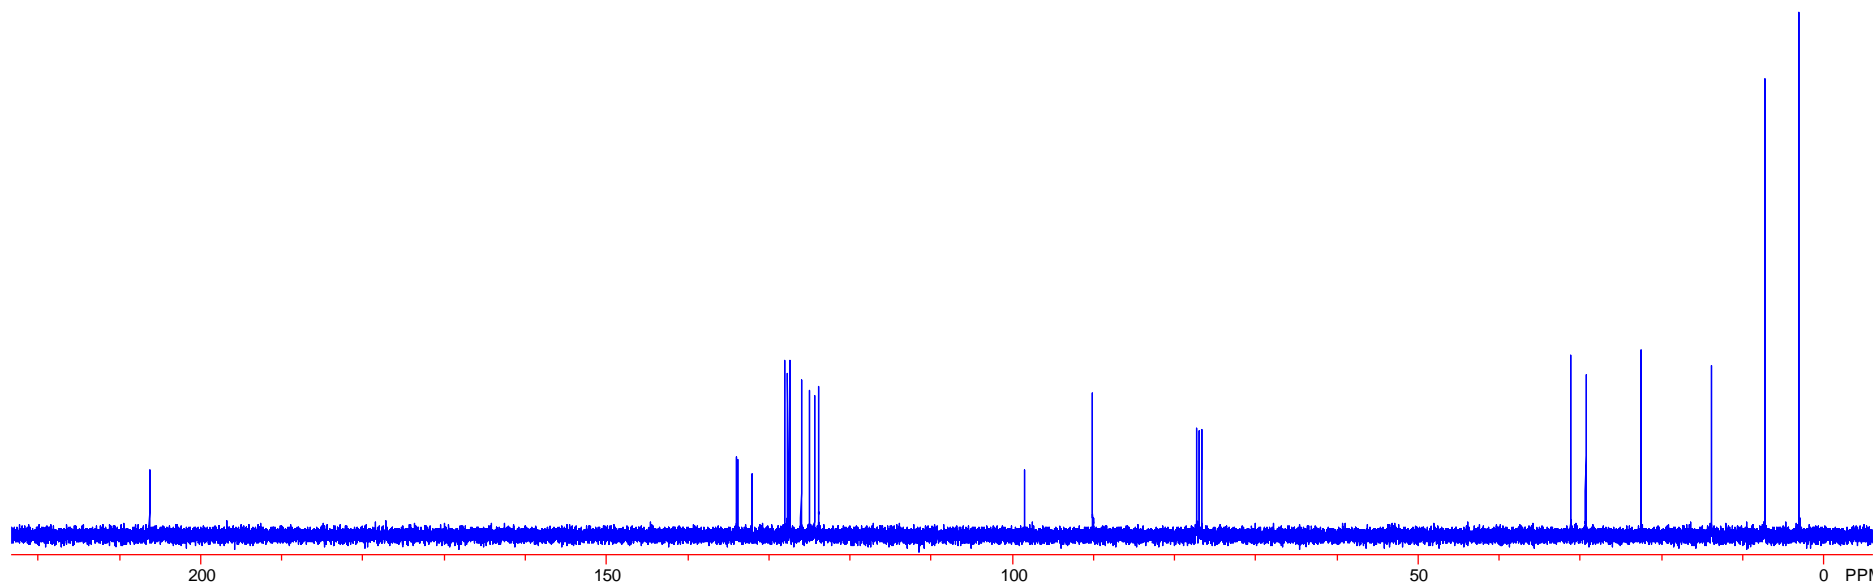



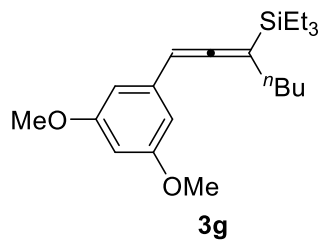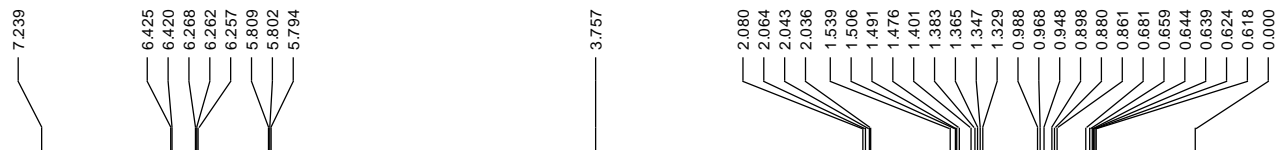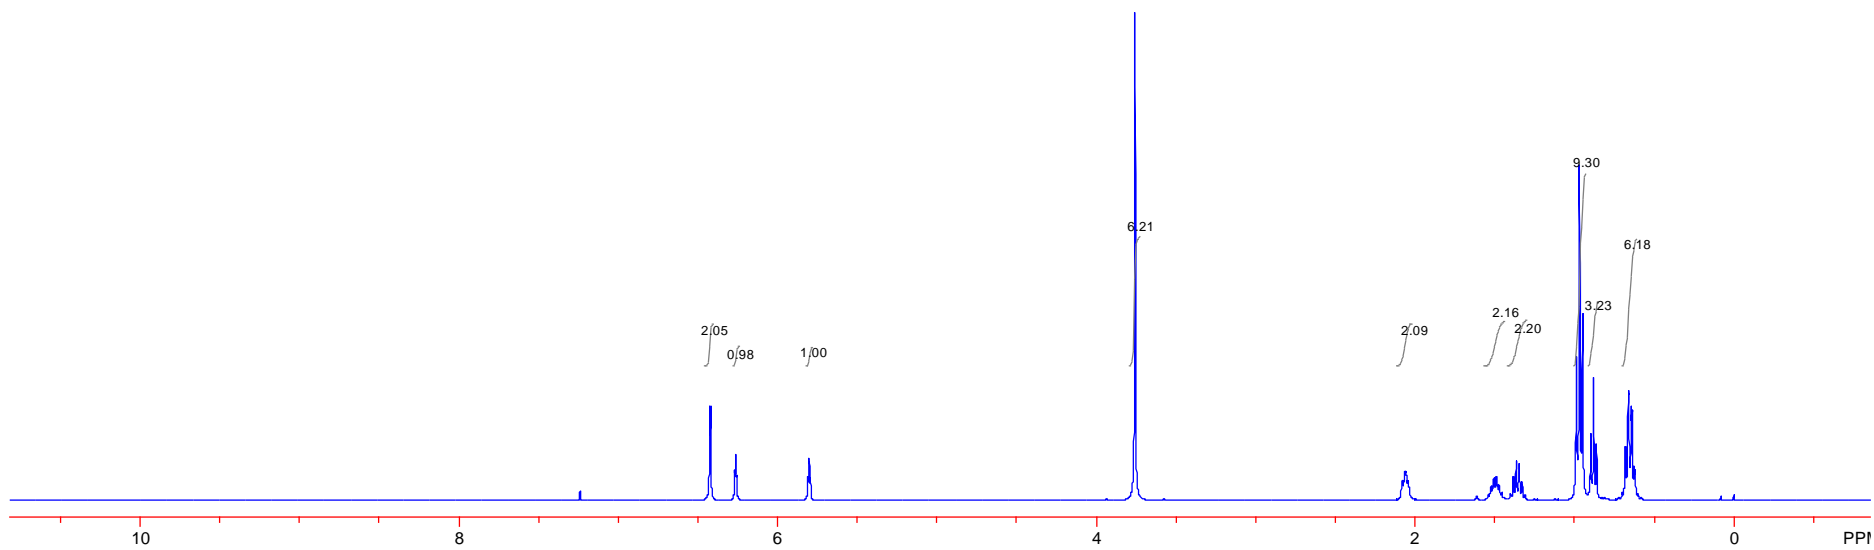

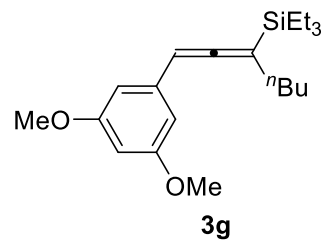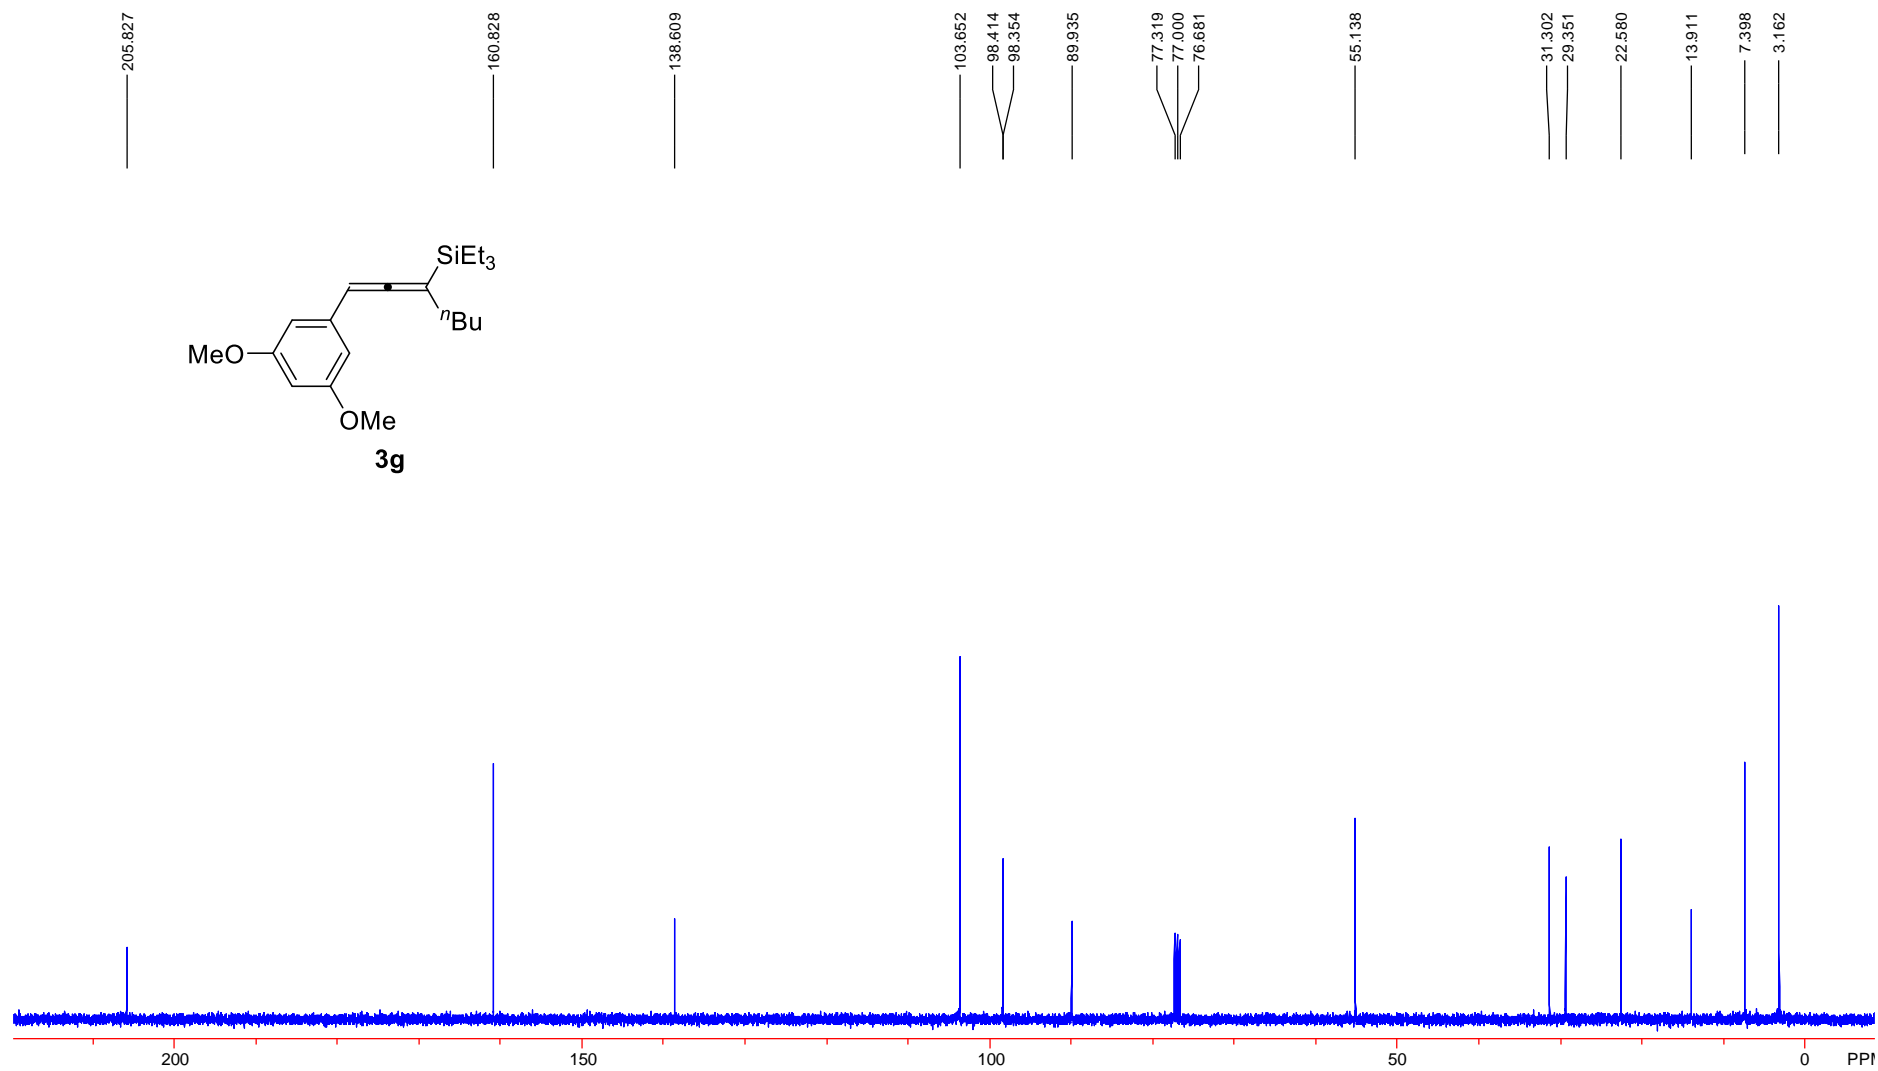

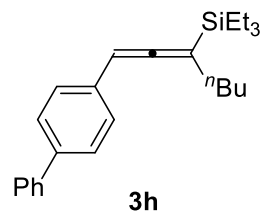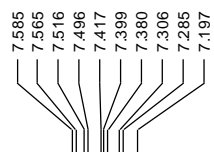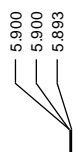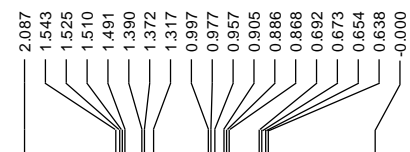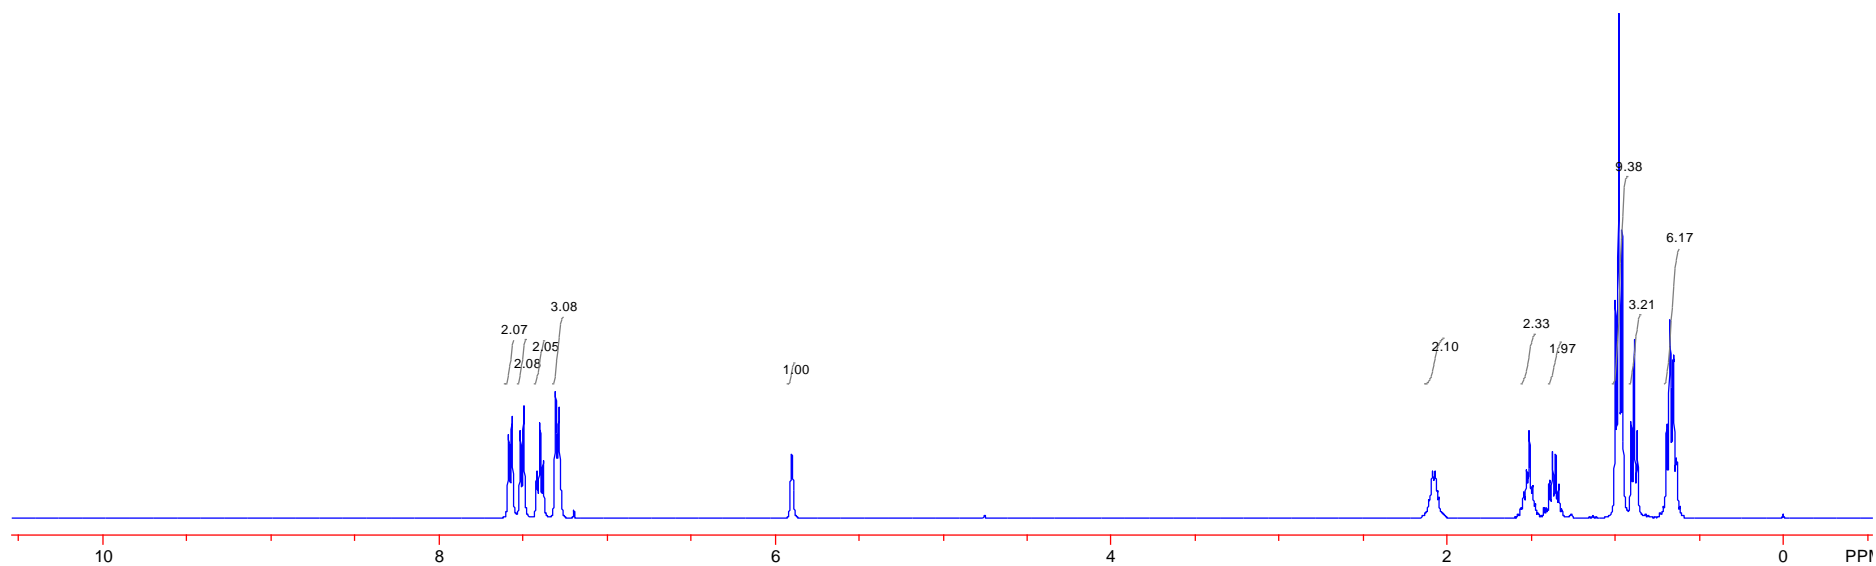

206.009

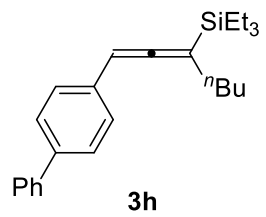

141.016  
138.450  
135.525  
128.682  
127.202  
126.919  
126.790  
126.173

98.415

89.394

77.319  
77.000  
76.681

31.361  
29.449

22.634

13.940

7.416

3.252

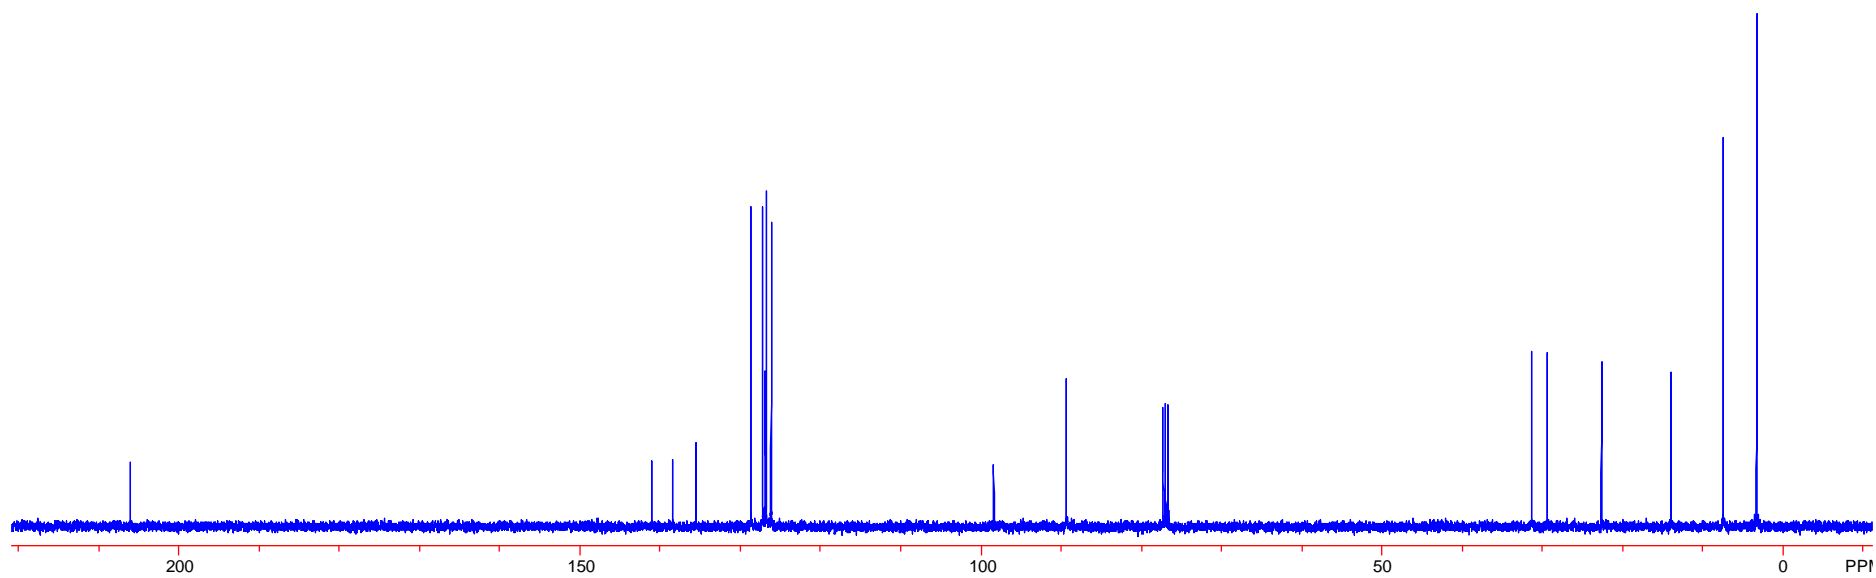

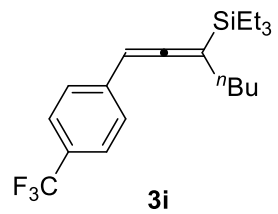

7.506  
7.486  
7.313  
7.292  
7.230

5.878  
5.878  
5.878

2.086  
2.086  
2.086

1.507  
1.489  
1.470  
1.365  
1.346  
1.346  
0.985  
0.965  
0.946  
0.900  
0.882  
0.864  
0.685  
0.665  
0.645  
0.625  
0.000

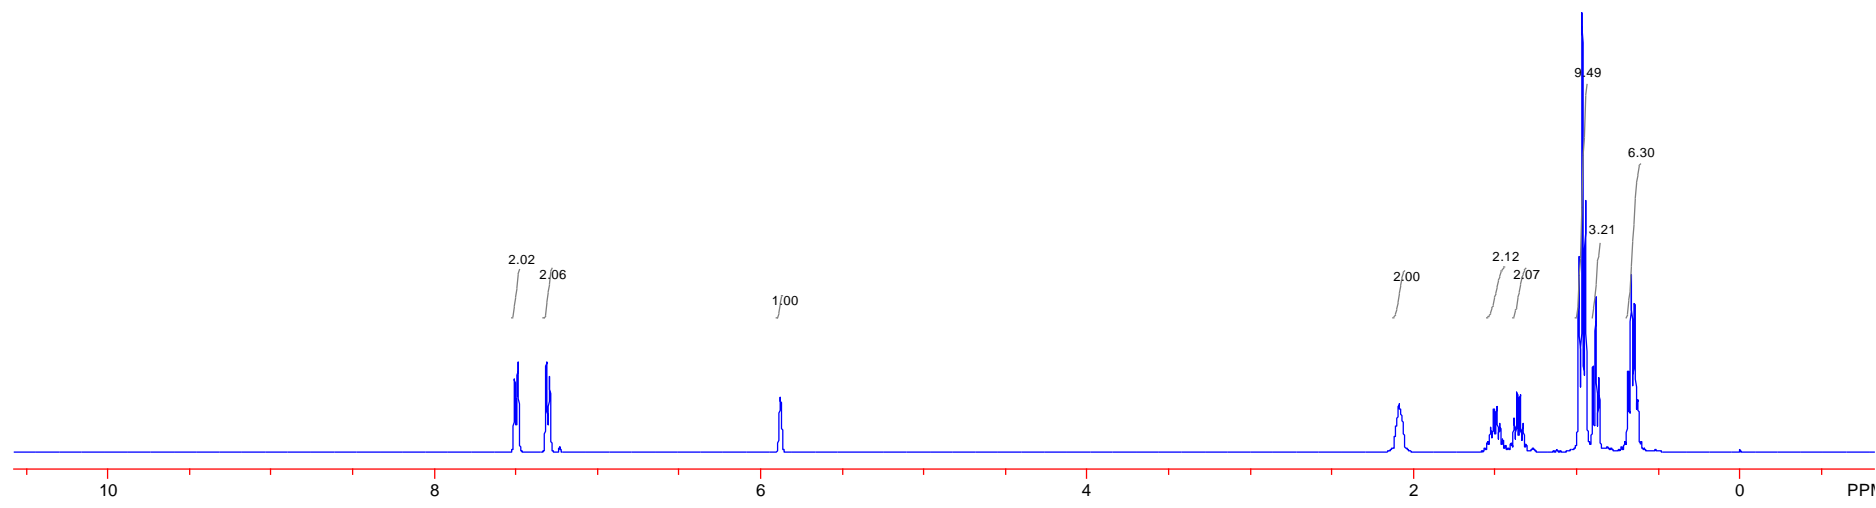

205.839

140.637  
127.940  
127.622  
127.303  
126.980  
125.794  
125.709  
125.467  
125.431  
125.394  
125.354  
123.095

98.964

88.991

77.319  
77.000  
76.681

31.329  
29.235

22.606

13.887

7.343

3.168

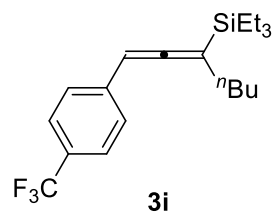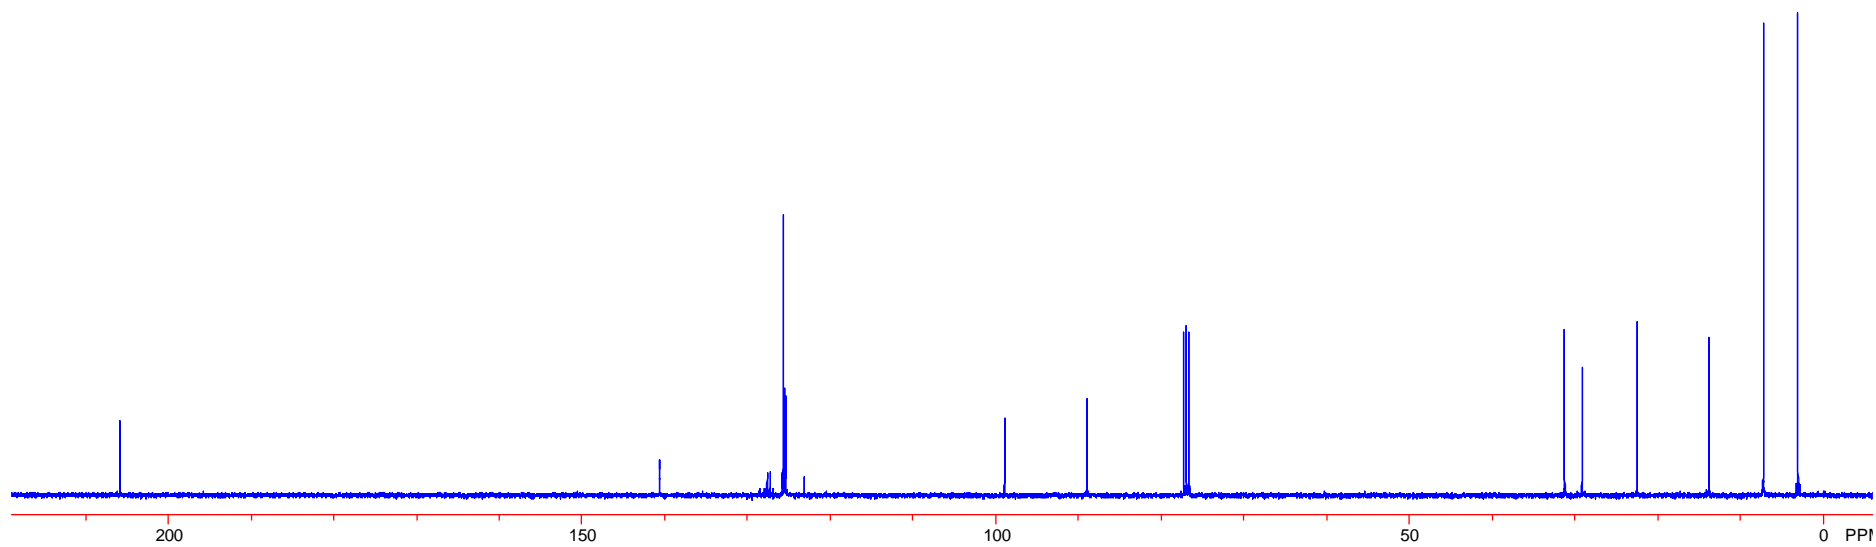

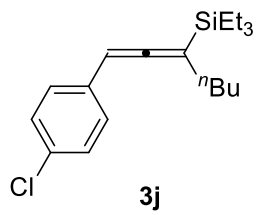

7.273  
7.225  
7.203  
7.147  
7.127

5.818  
5.811  
5.804

2.086  
2.068  
2.040  
1.509  
1.491  
1.472  
1.353  
1.353  
1.335  
0.972  
0.952  
0.933  
0.895  
0.876  
0.858  
0.668  
0.649  
0.630  
0.604  
0.000

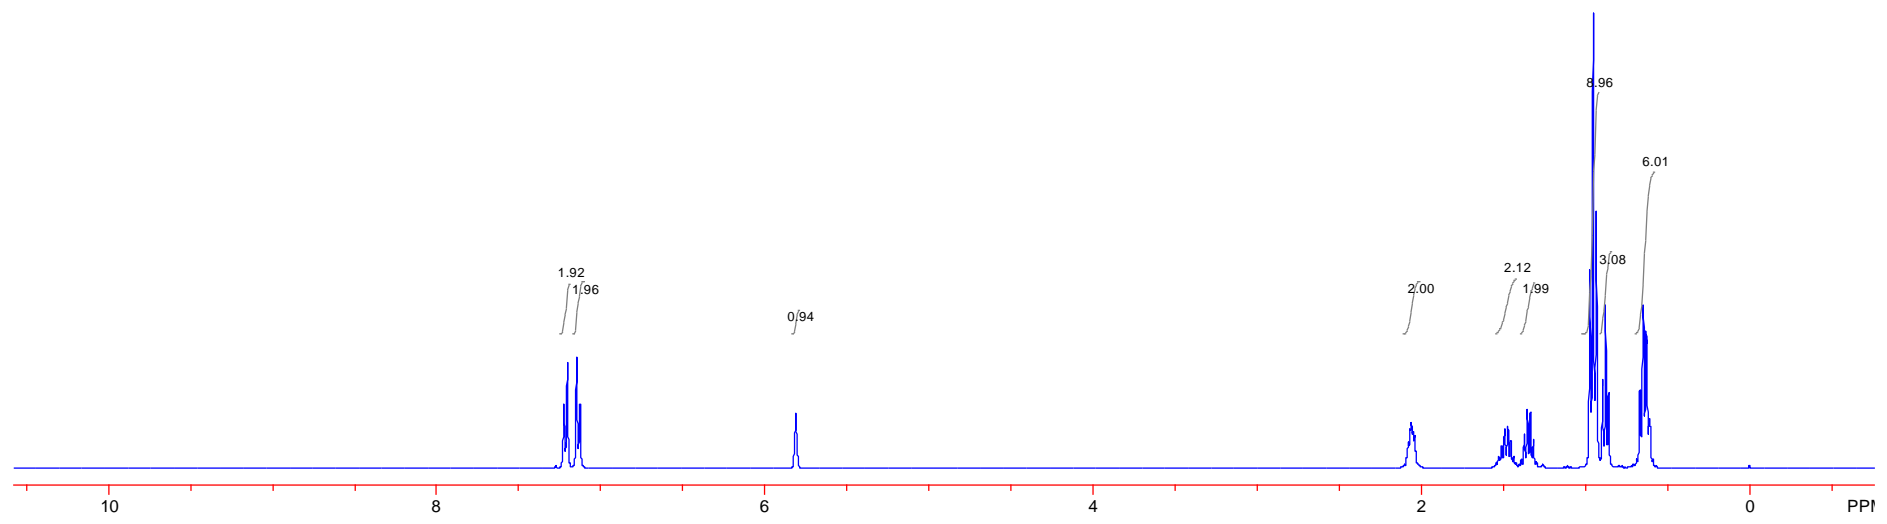

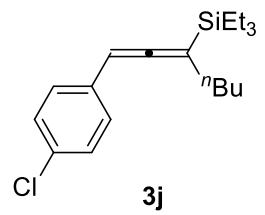

205.660

134.988  
130.980  
128.573  
126.881

98.817

88.872

77.319  
77.000  
76.681

31.325  
29.336

22.595

13.911

7.367

3.200

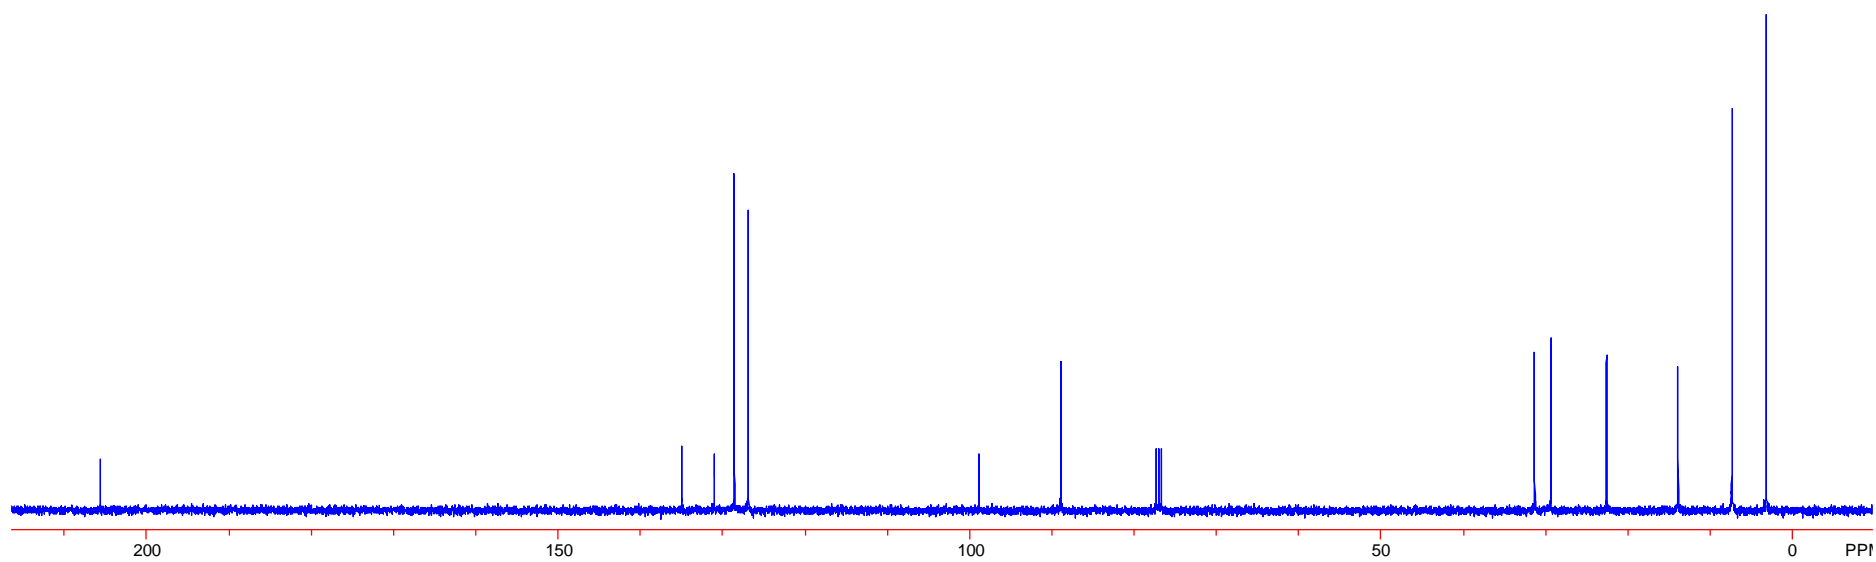



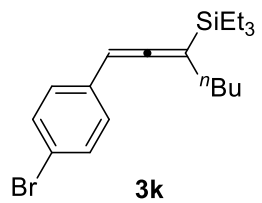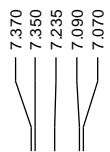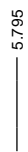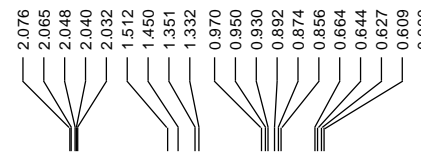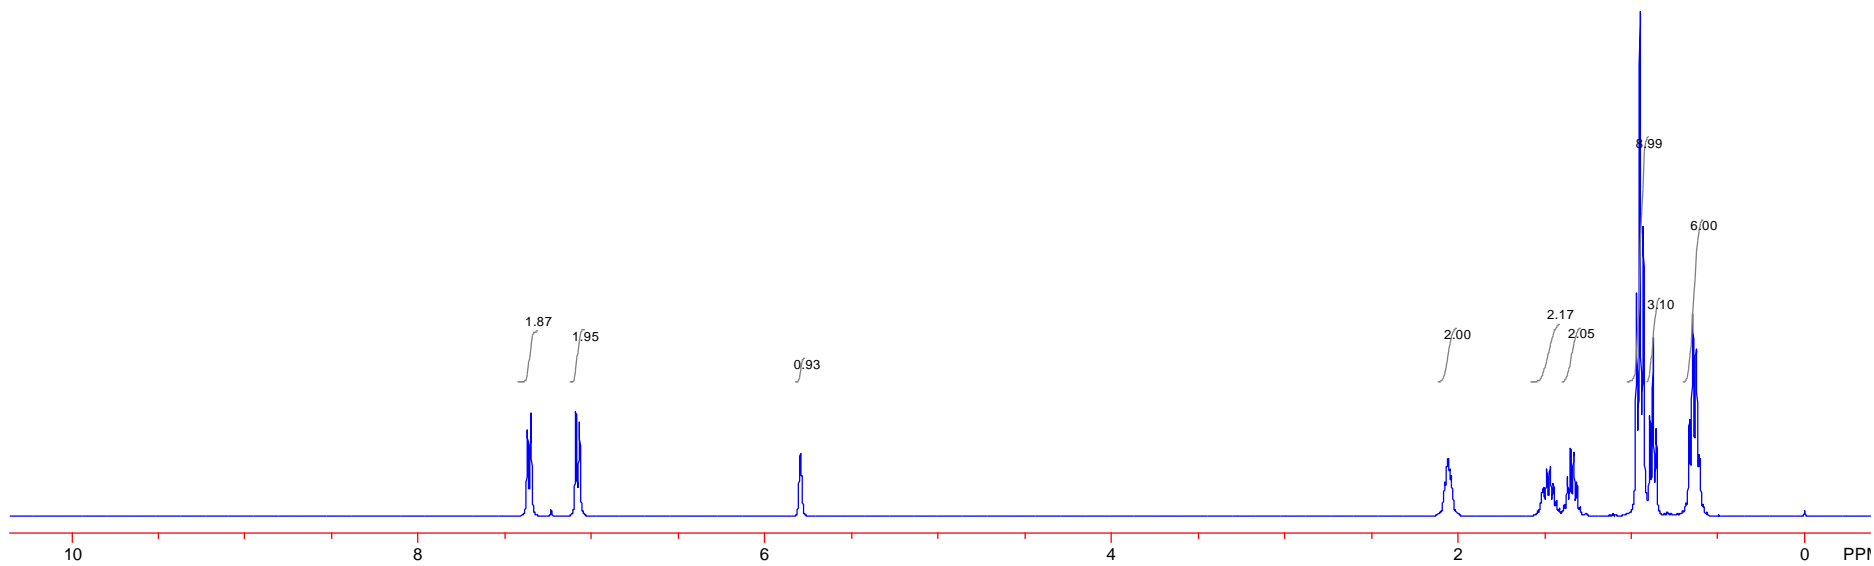

205.621

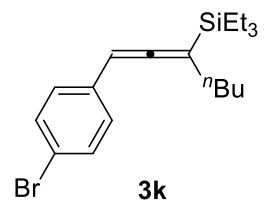

135.501

131.507

127.262

118.927

98.895

88.934

77.319

77.000

76.681

31.321

29.295

22.590

13.903

7.367

3.208

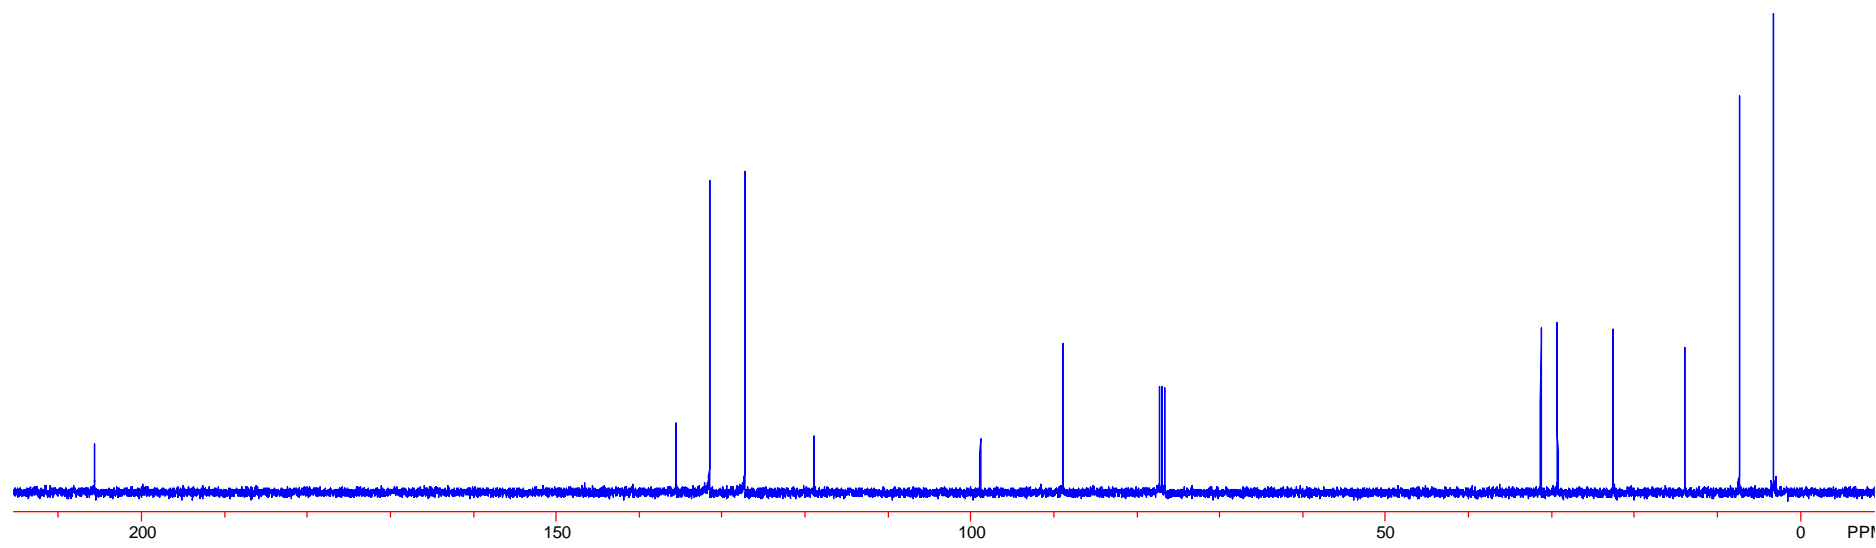

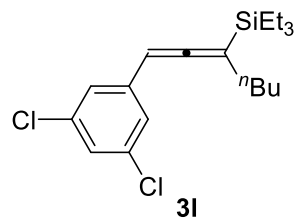

7.247  
7.073

5.737  
5.737  
5.737

2.083  
2.062  
2.040  
1.487  
1.487  
1.469  
1.361  
1.343  
1.325  
0.982  
0.962  
0.942  
0.908  
0.890  
0.872  
0.674  
0.655  
0.636  
-0.000

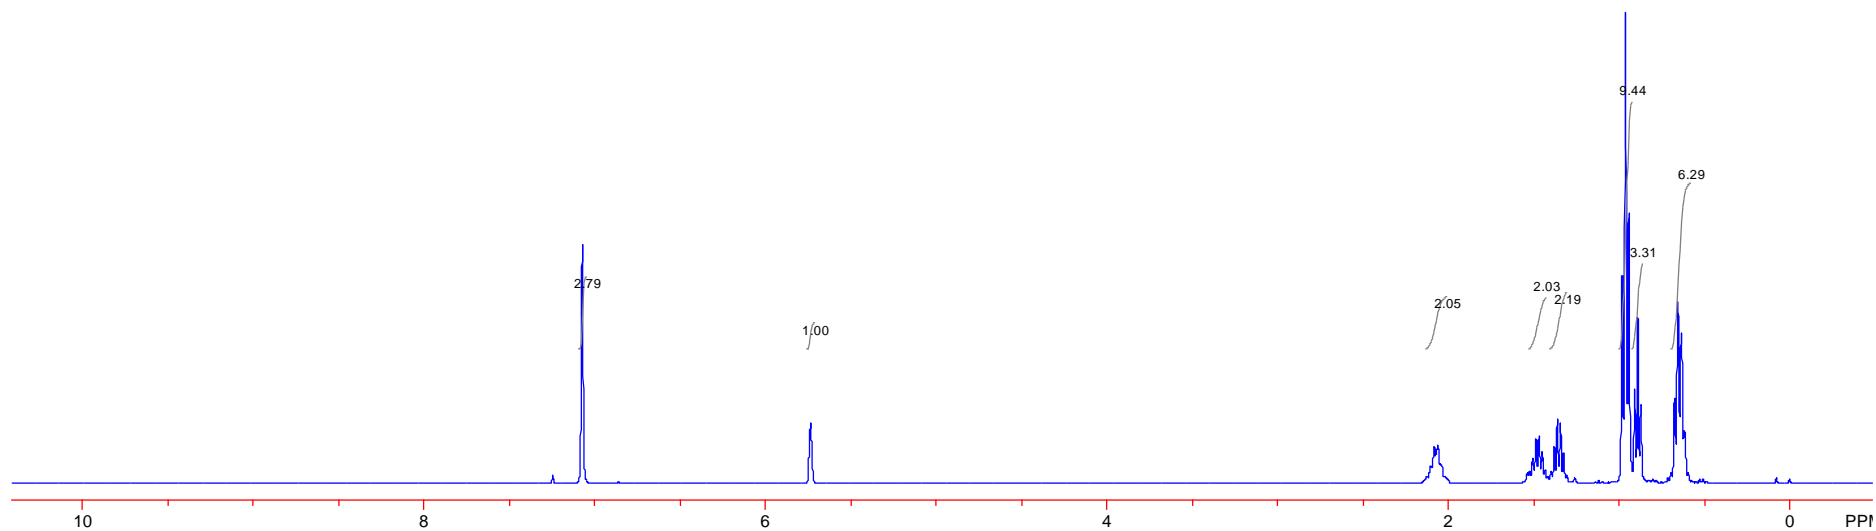

205.319

140.150

134.942

125.340

123.882

99.636

88.197

77.319

77.000

76.681

31.241

29.184

22.580

13.881

7.322

3.132

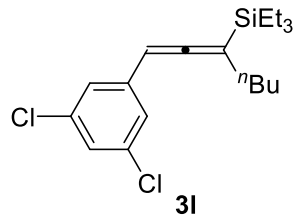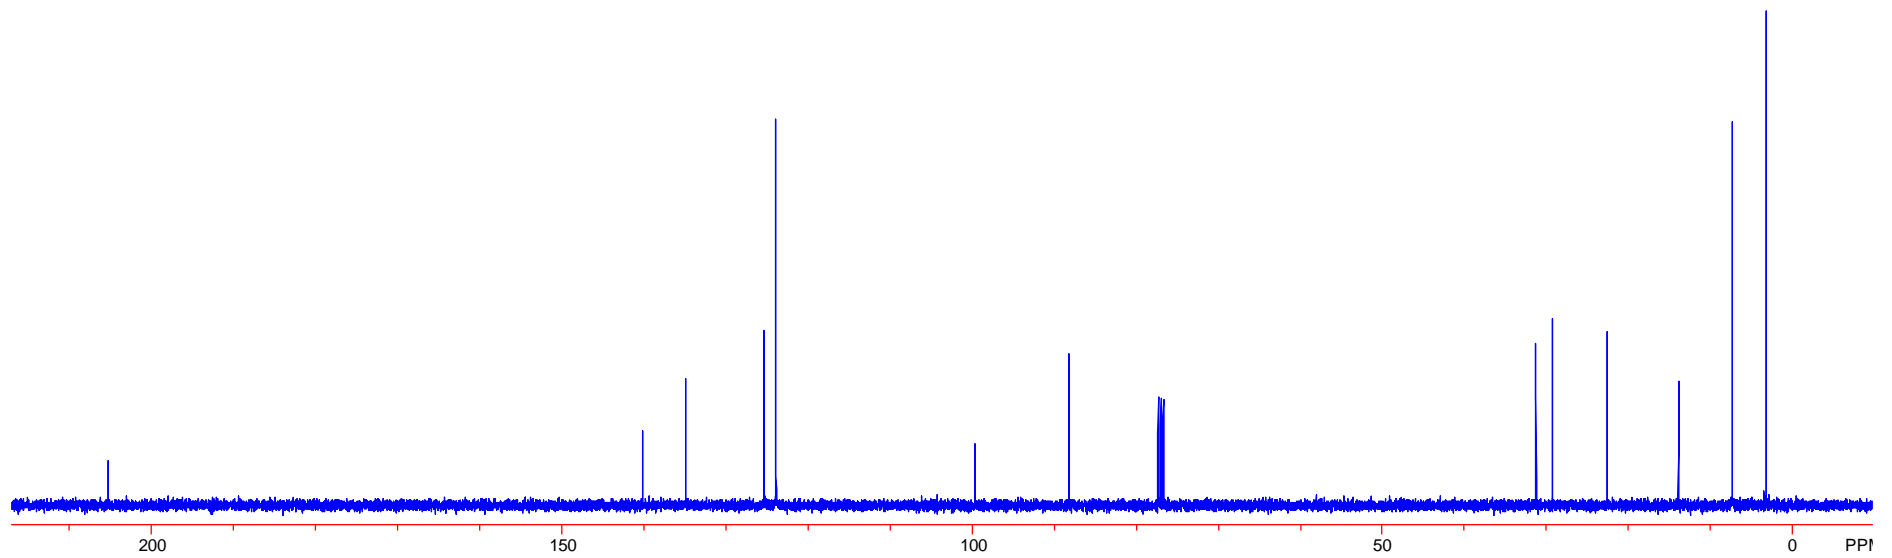

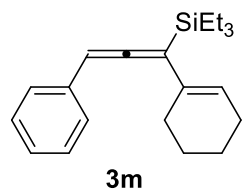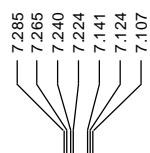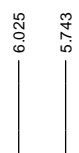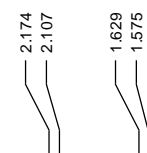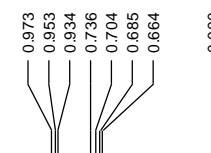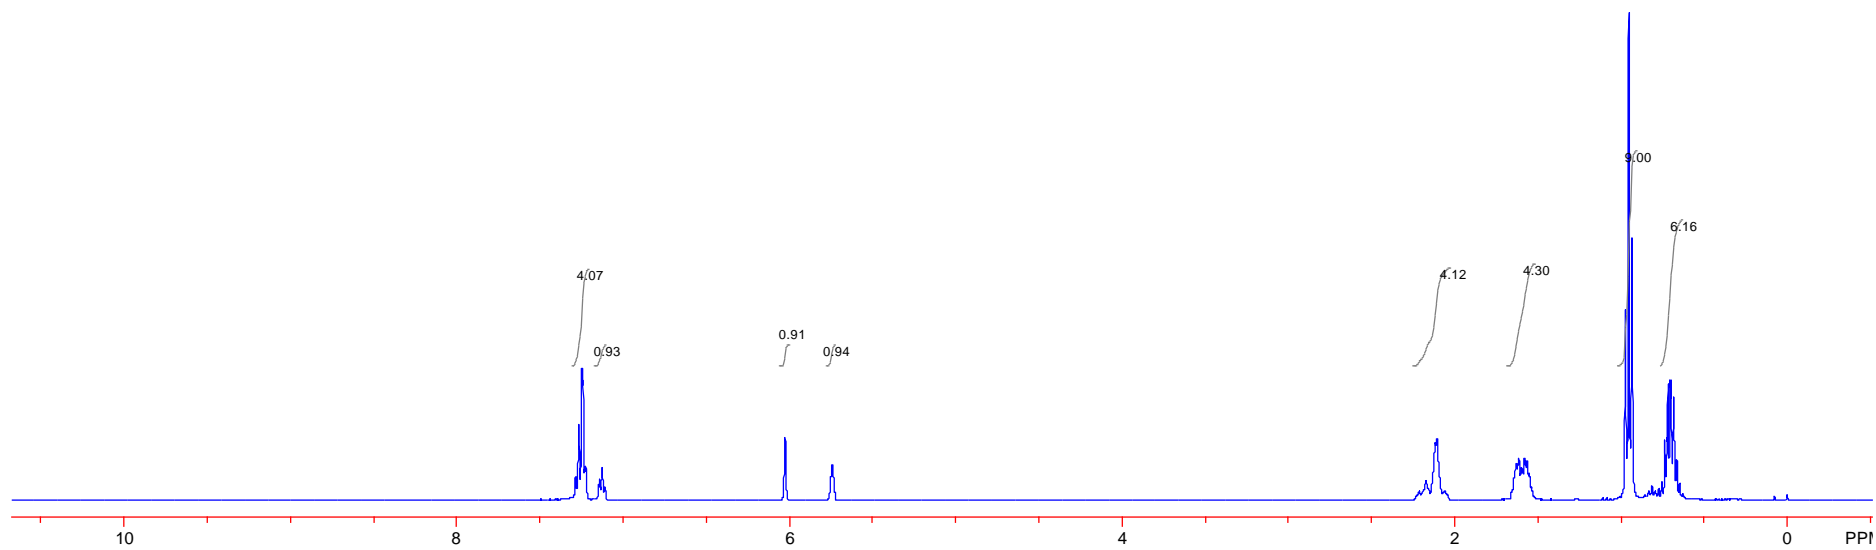

208.947

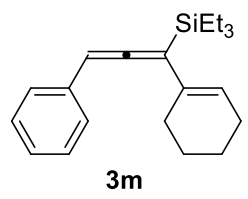

135.808  
133.363  
128.520  
125.932  
125.871  
125.317

103.280

90.983

77.311  
77.000  
76.681

28.395  
26.064  
23.035  
22.216

7.497  
4.134

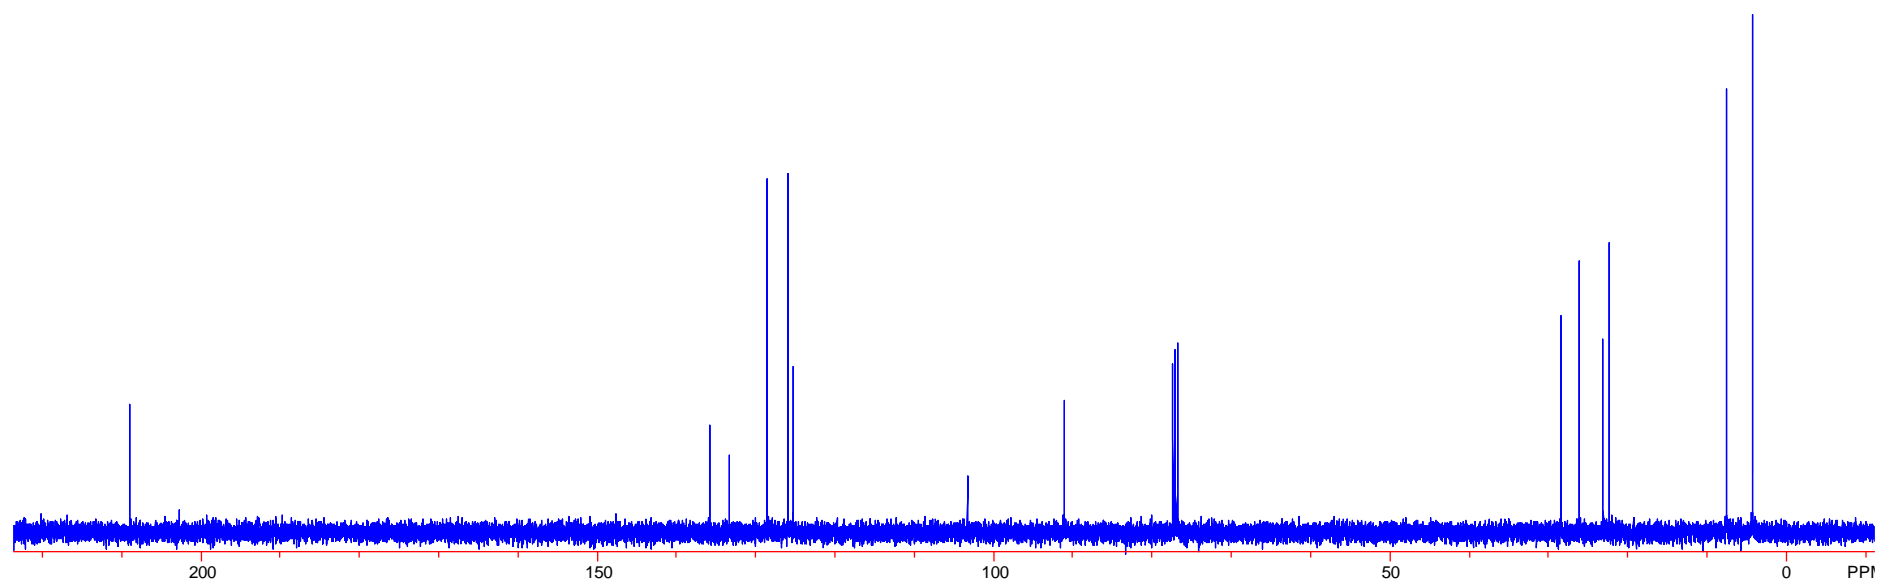

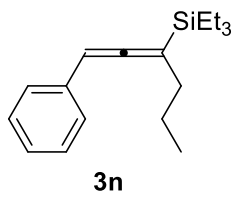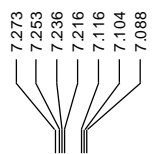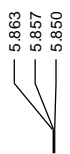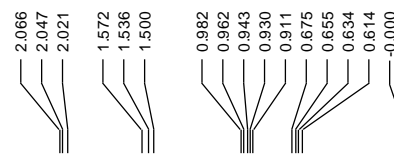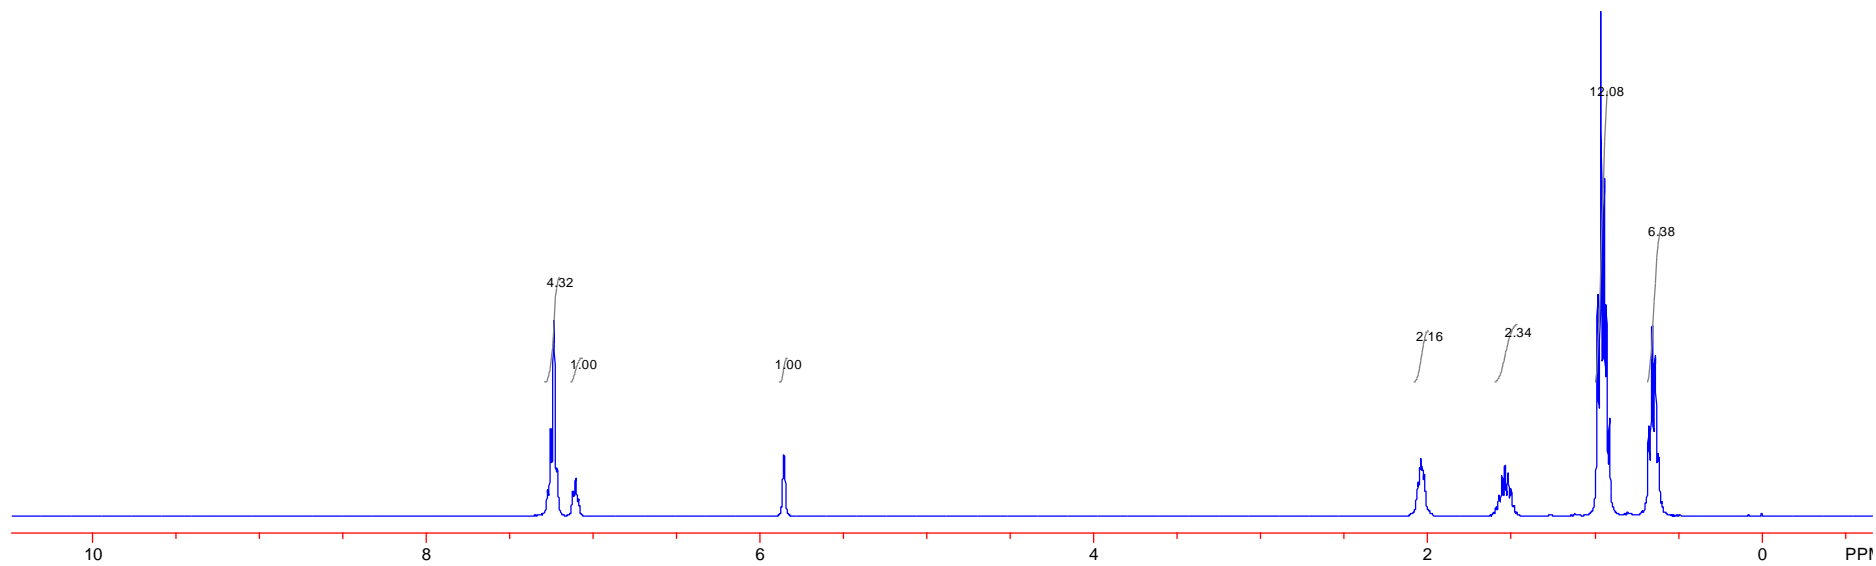

205.856

136.324

128.453

125.790

125.600

98.145

89.660

77.319

77.000

76.685

31.874

22.412

14.109

7.400

3.200

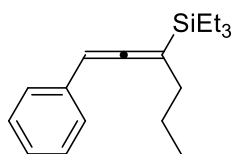

**3n**

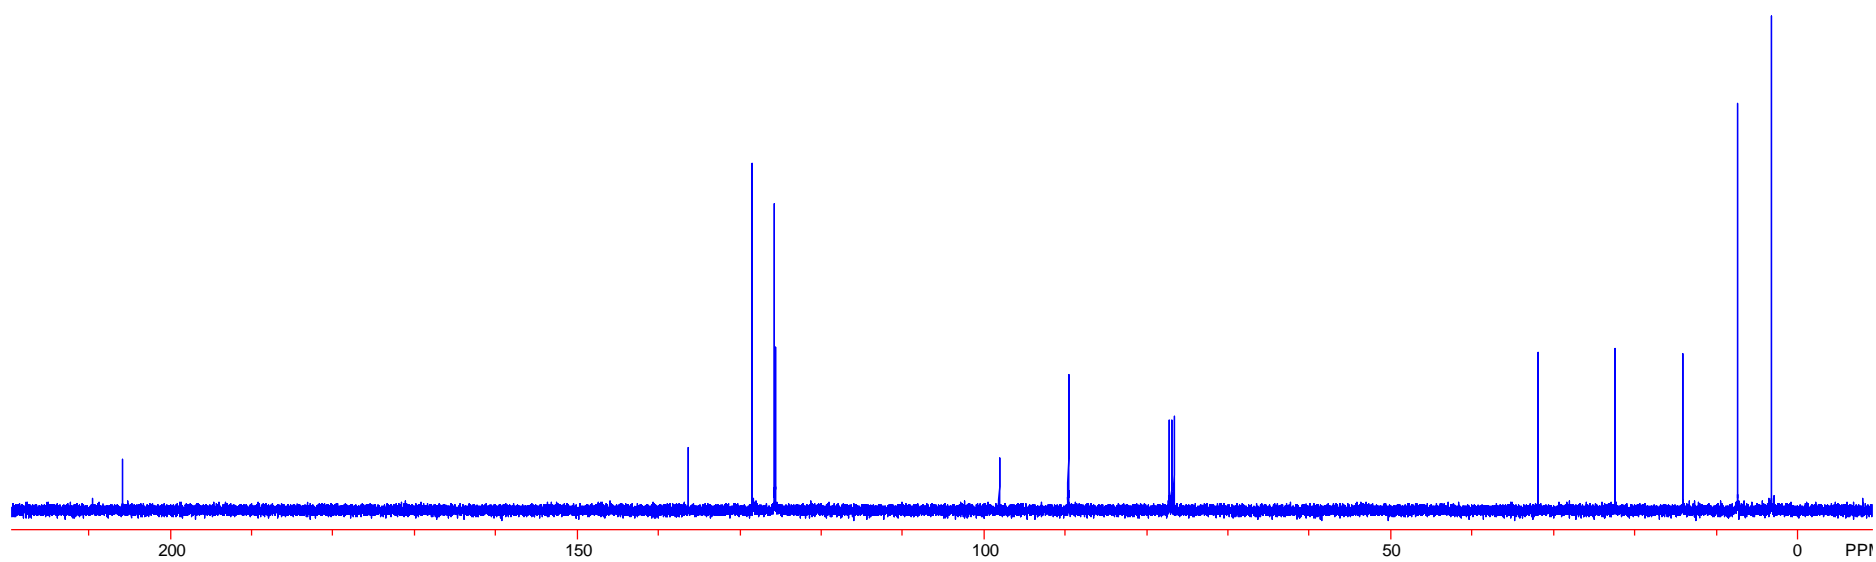



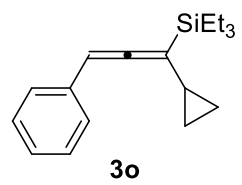

7.259  
7.243  
7.226  
7.191  
7.174  
7.124  
7.108  
7.092

5.908

1.151  
1.010  
0.992  
0.975  
0.709  
0.691  
0.487  
-0.000

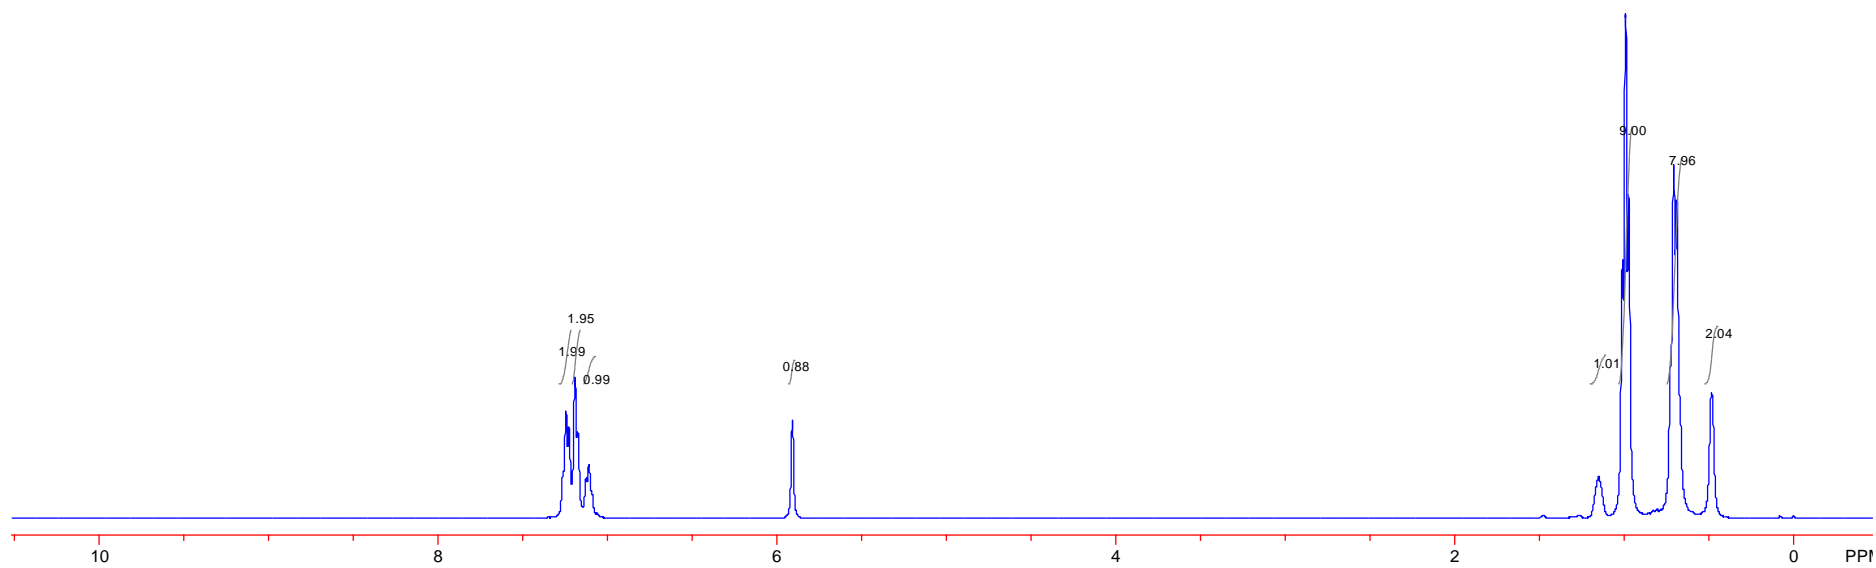

203.990

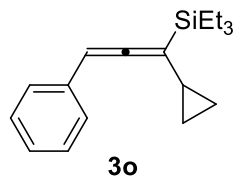

135.967

128.482

125.856

125.757

102.749

91.529

77.319

77.000

76.681

9.797

8.620

7.998

7.405

3.367

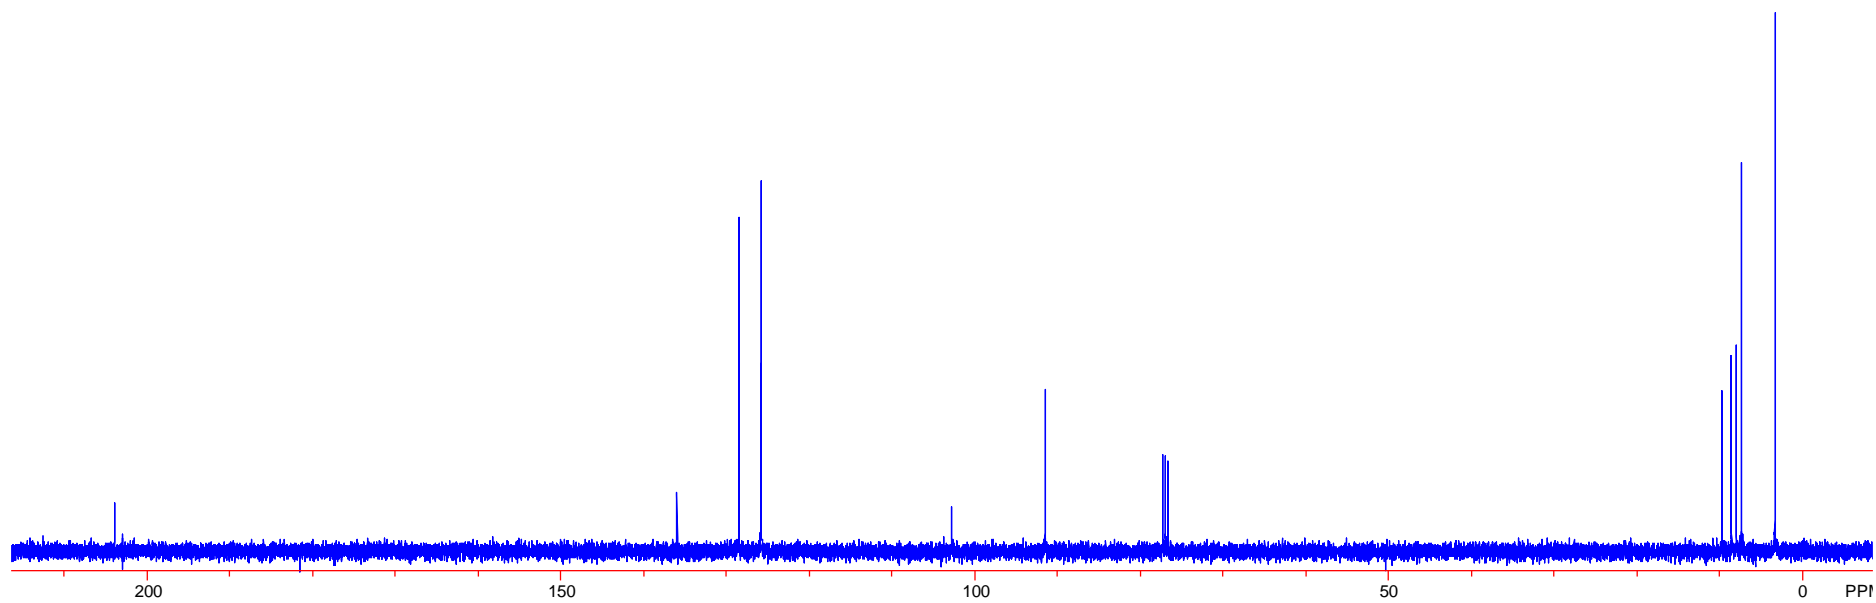

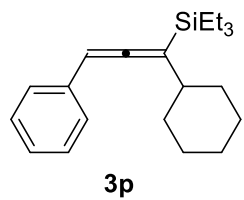

7.251  
7.239  
7.215  
7.116  
7.104  
7.098

5.881

1.900  
1.836  
1.808  
1.714  
1.638  
1.608  
1.279  
1.251  
1.223  
1.192  
1.152  
0.977  
0.958  
0.937  
0.676  
0.657  
0.641  
0.615  
-0.000

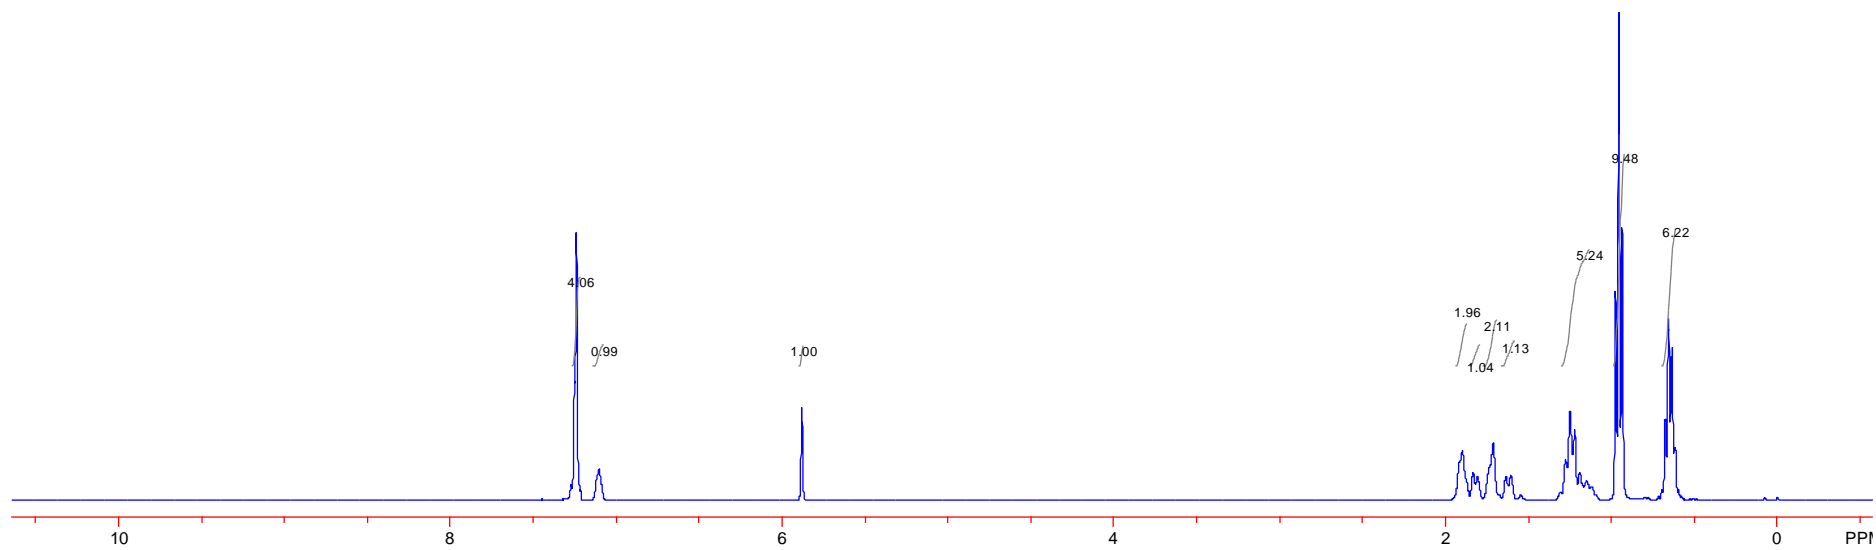

206.102

136.340

128.465

125.637

125.592

104.153

90.492

77.319

77.000

76.681

39.600

34.706

34.141

26.822

26.778

26.031

7.456

3.503

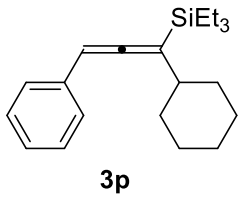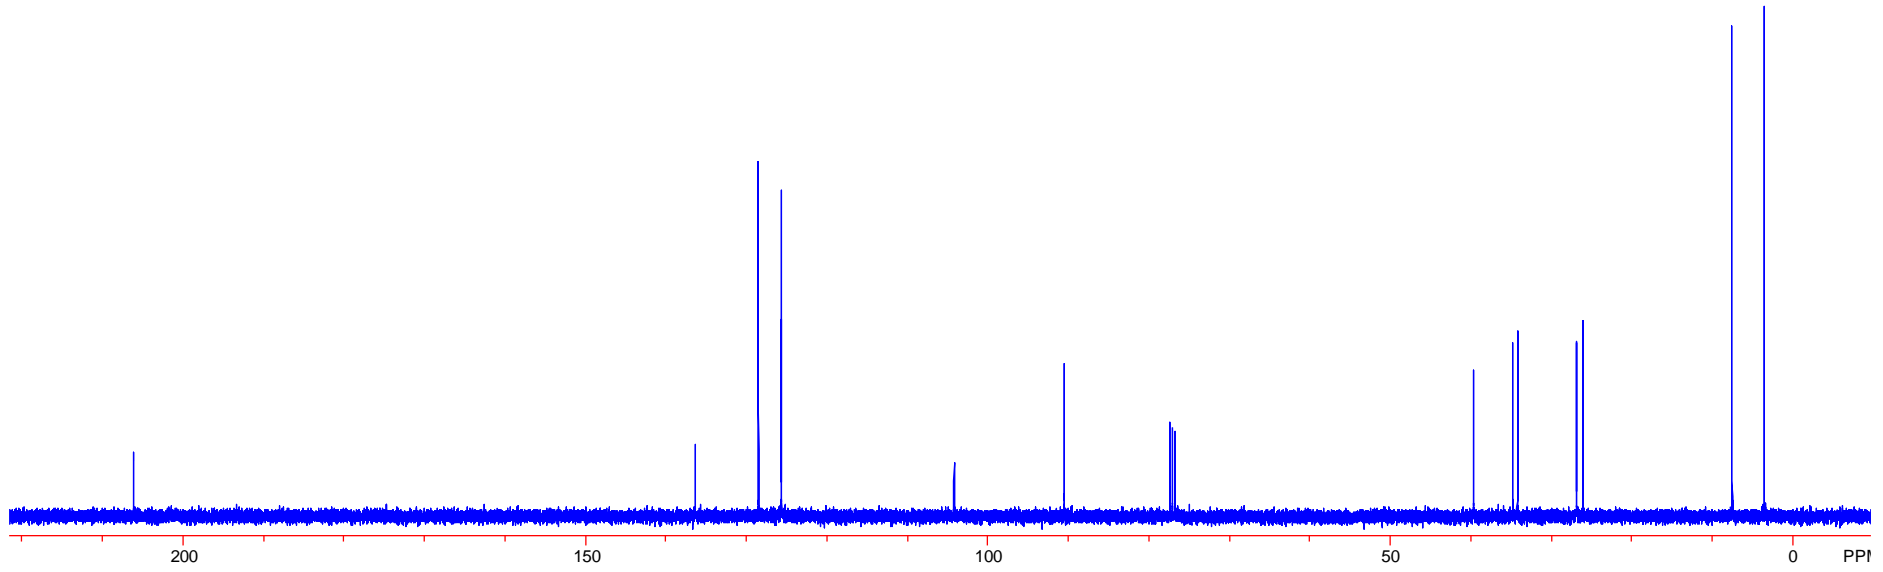

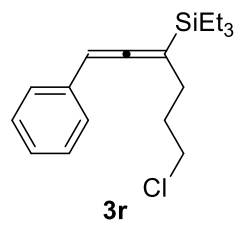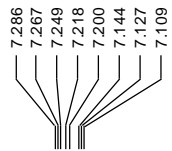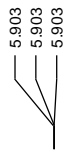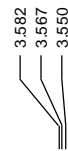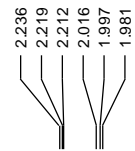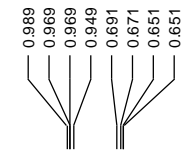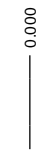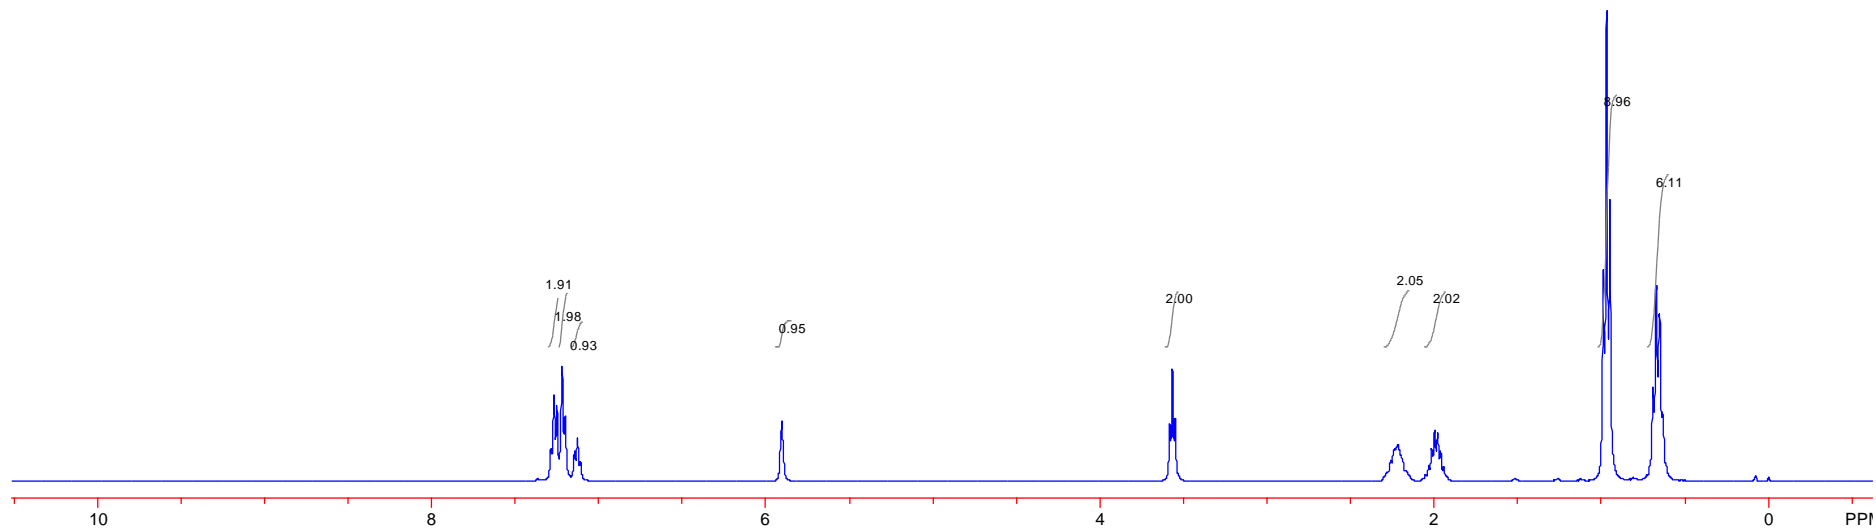

205.541

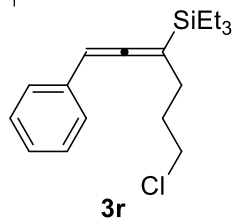

135.727

128.558

125.911

125.810

97.241

90.475

77.319

77.000

76.685

44.720

31.611

26.471

7.368

3.107

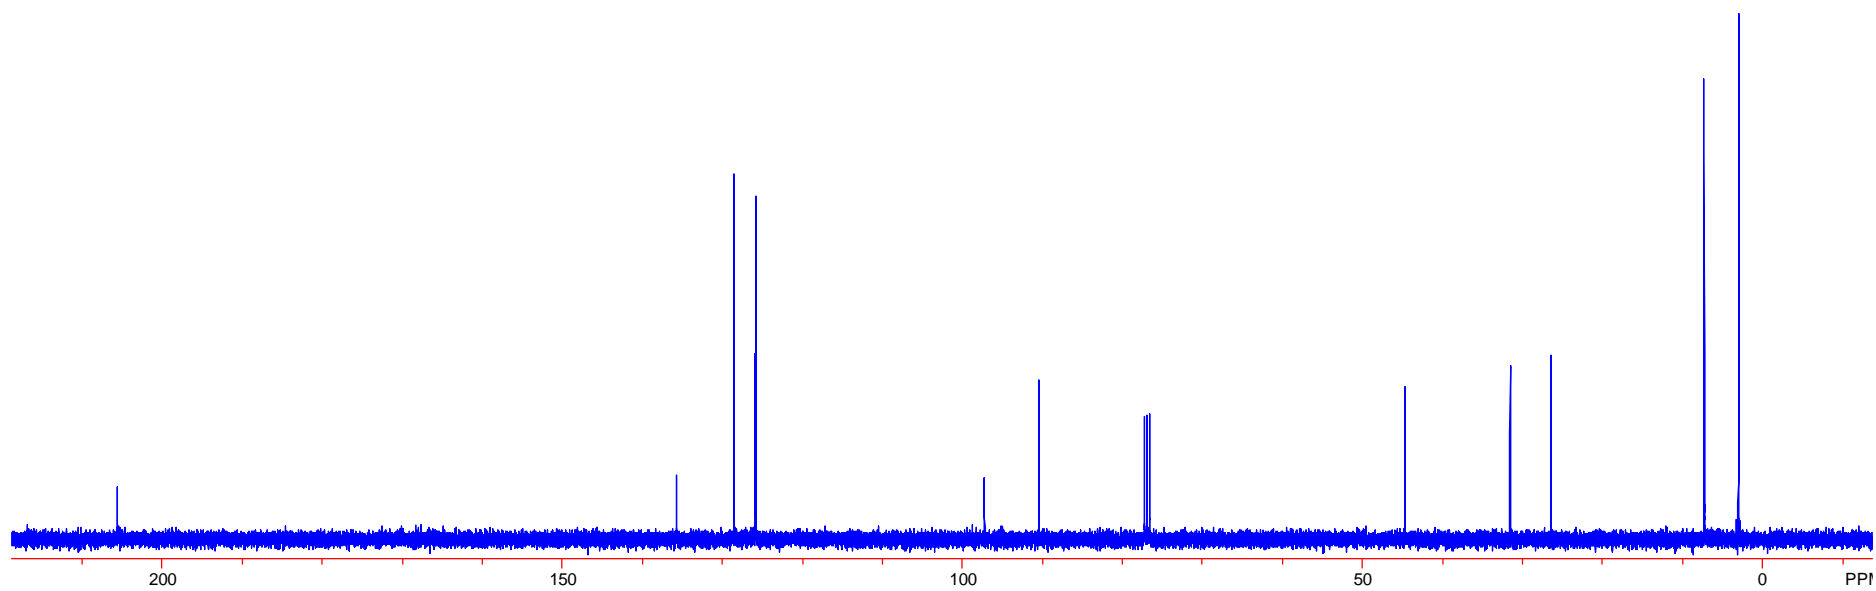

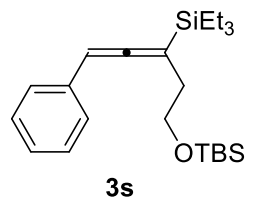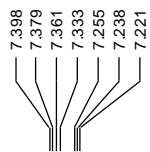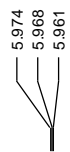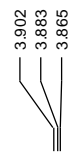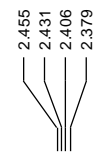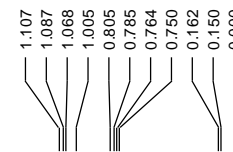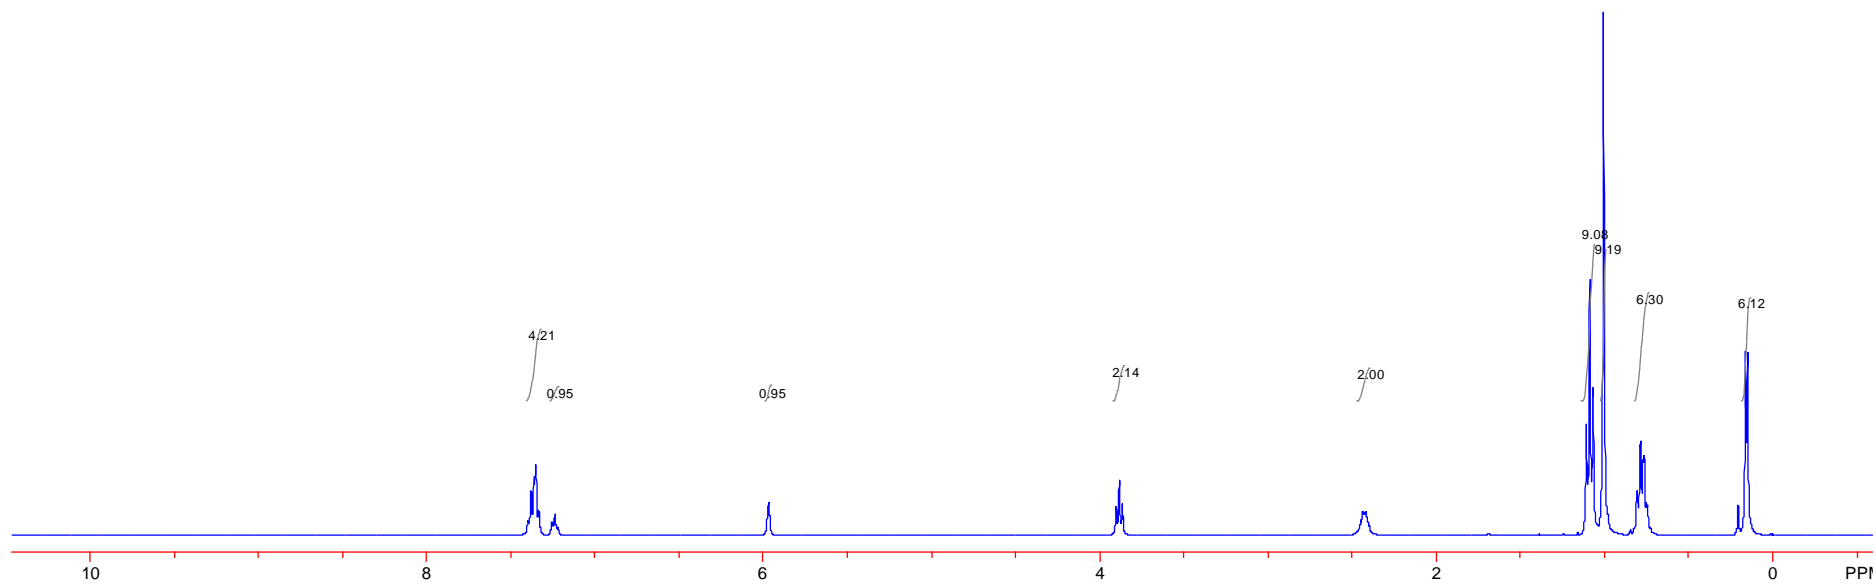





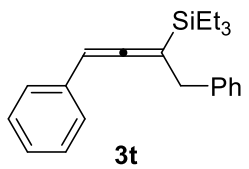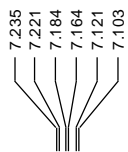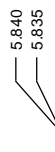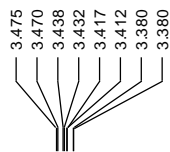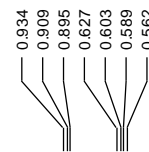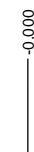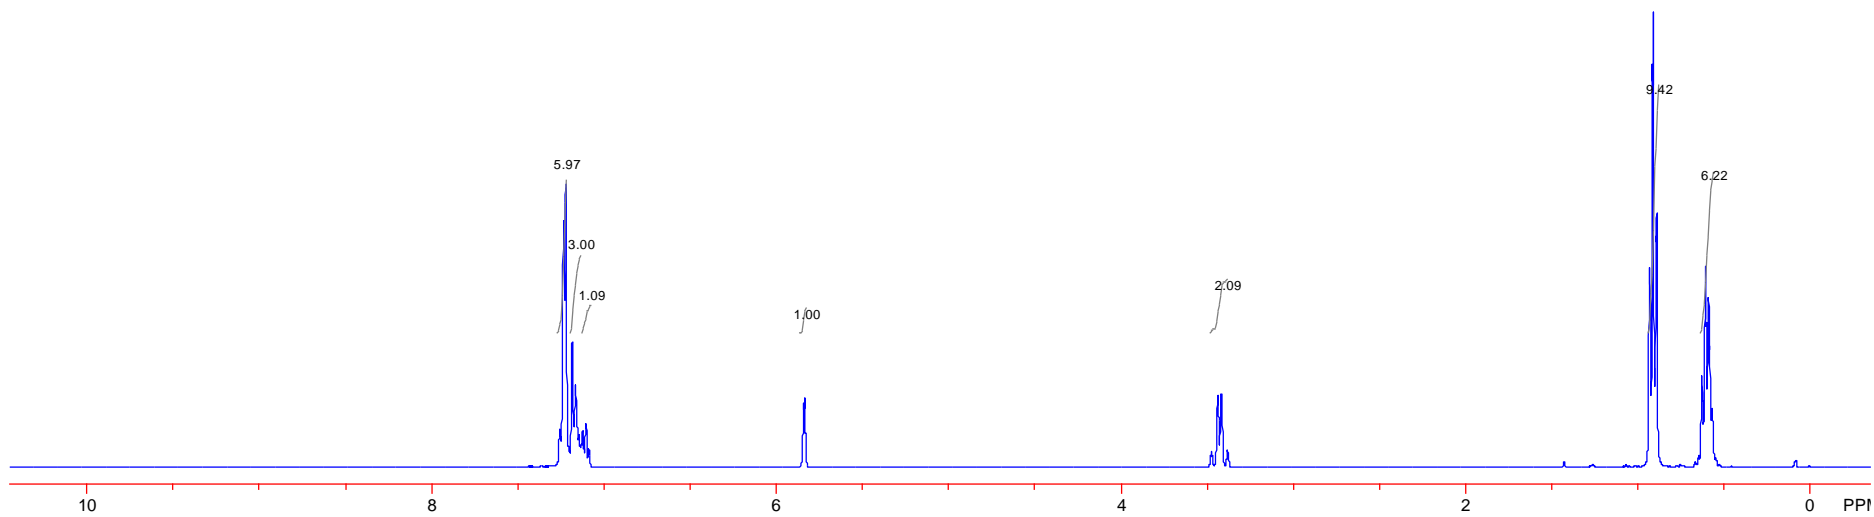

207.801

140.188  
135.739  
128.892  
128.422  
128.088  
126.091  
125.939  
125.803

98.050

89.738

77.319  
77.000  
76.689

36.851

7.299  
3.253

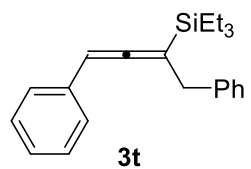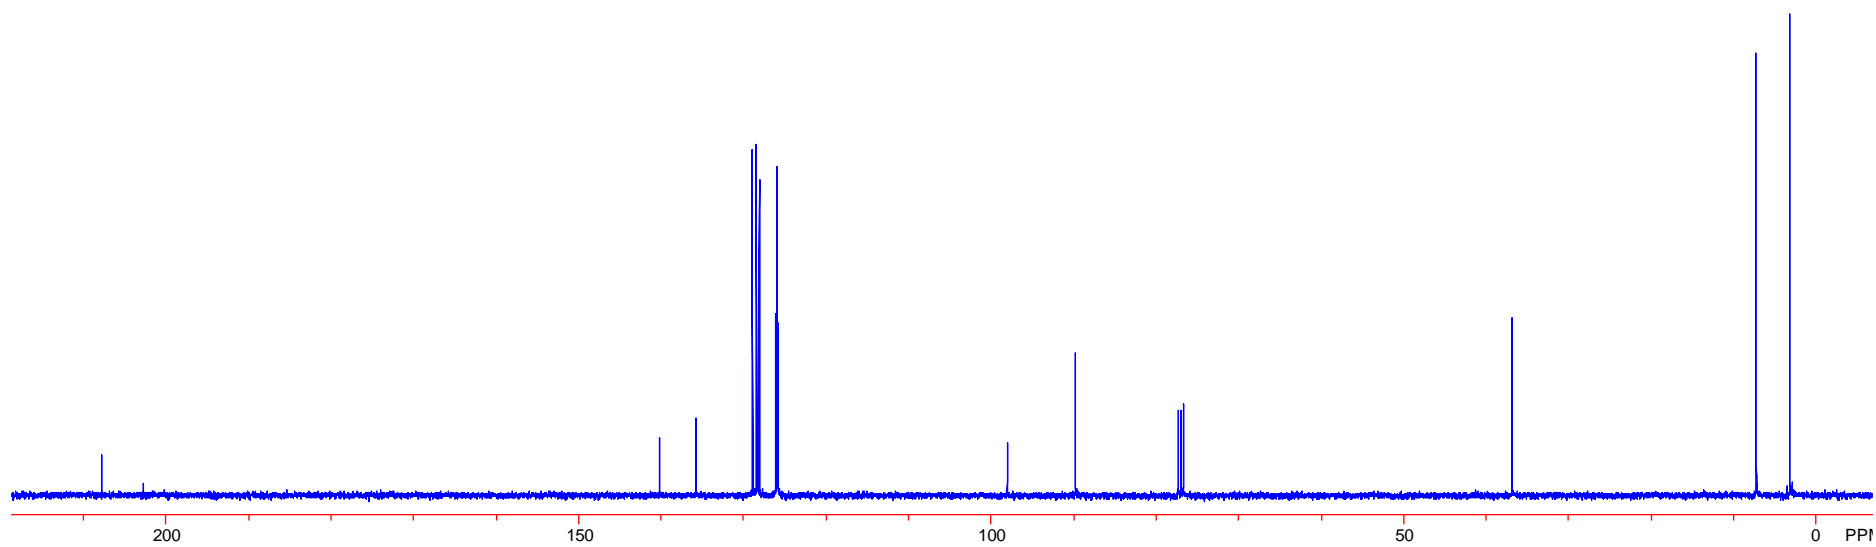

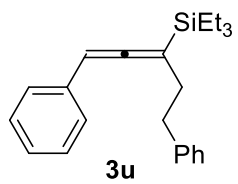

7.250  
7.233  
7.216  
7.193  
7.164  
7.130  
7.095

5.914

2.871  
2.838  
2.777  
2.757  
2.414  
2.376  
2.353  
2.315

0.975  
0.955  
0.936  
0.680  
0.663  
0.639  
0.619

0.000

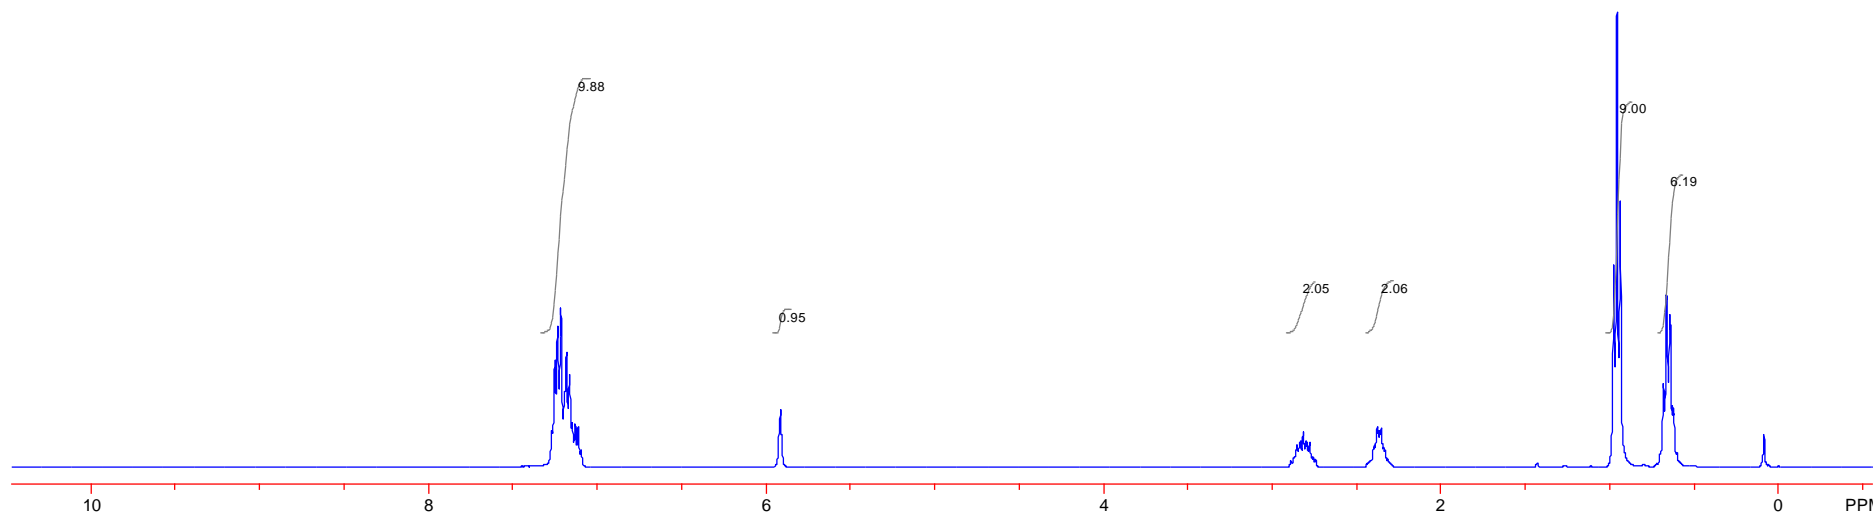

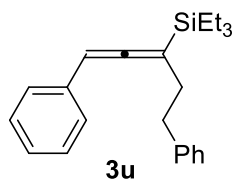

205.936

142.231

136.046

128.469

128.408

128.267

125.899

125.770

125.758

98.012

90.443

77.319

77.000

76.685

35.375

31.599

7.388

3.188

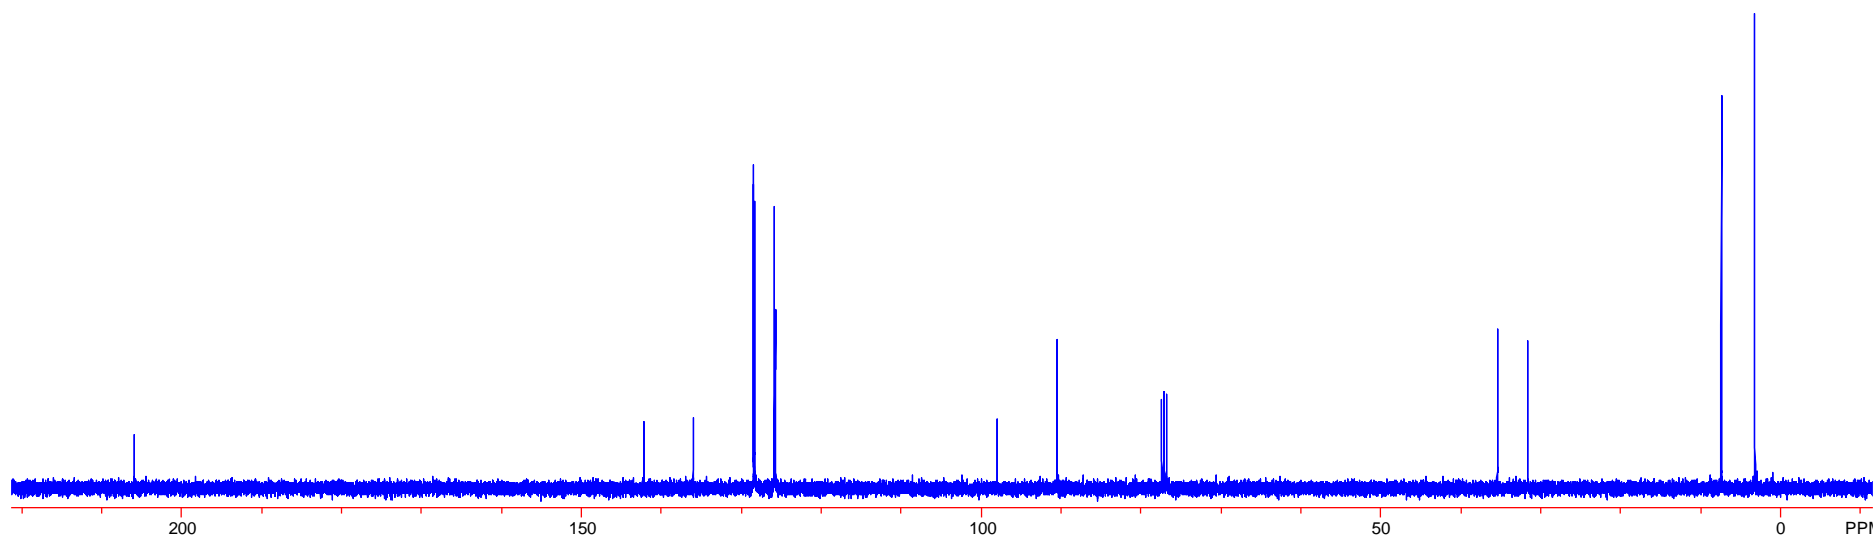

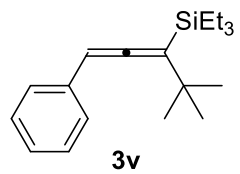

7.279  
7.259  
7.240  
7.219  
7.132  
7.115  
7.089

5.865

1.179  
0.968  
0.948  
0.929  
0.717  
0.697  
0.669  
-0.000

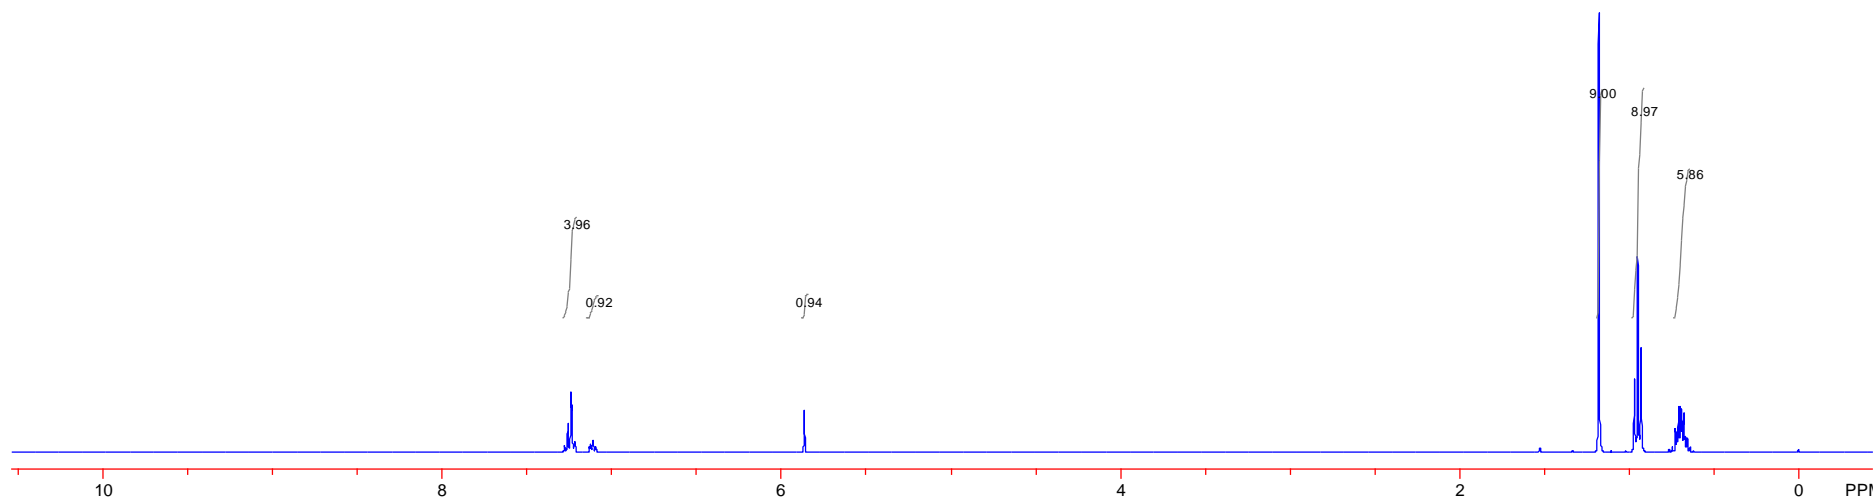

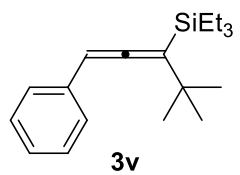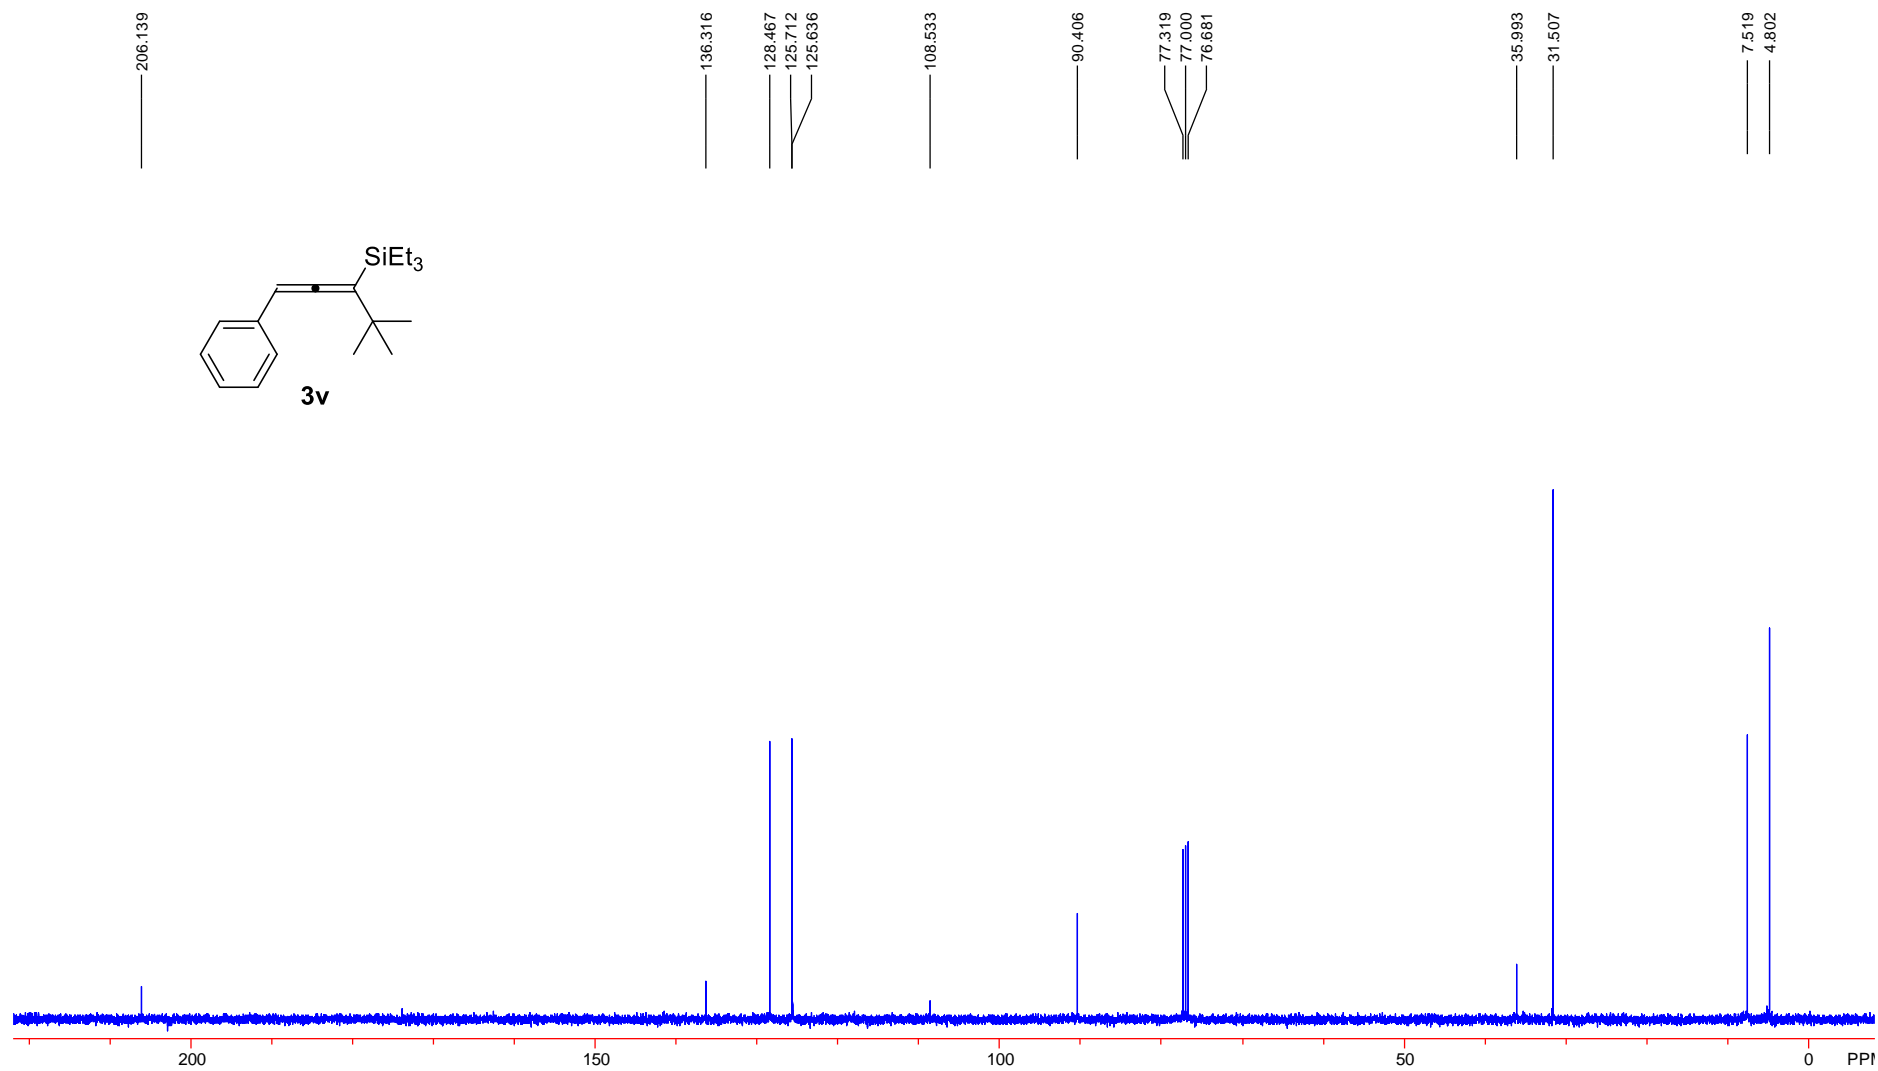

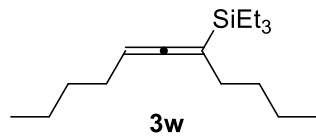

7.253

4.764  
4.755  
4.748  
4.740  
4.731

1.961  
1.961  
1.891  
1.871  
1.456  
1.420  
1.359  
1.300  
0.953  
0.933  
0.913  
0.895  
0.877  
0.613  
0.593  
0.574  
0.554  
0.000

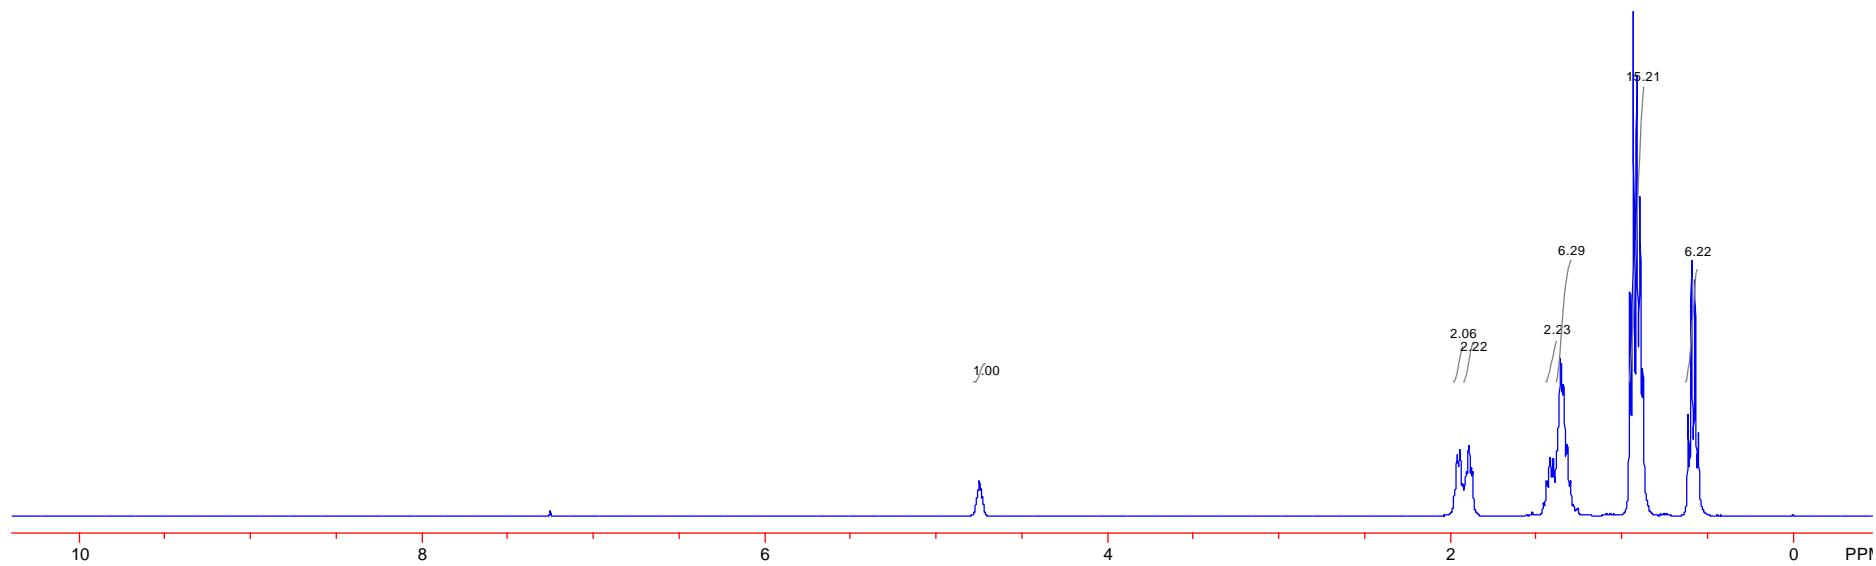

206.231

92.961

85.307

77.319

77.000

76.685

32.164

31.289

29.388

28.561

22.525

22.340

14.017

13.968

7.388

3.212

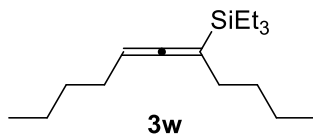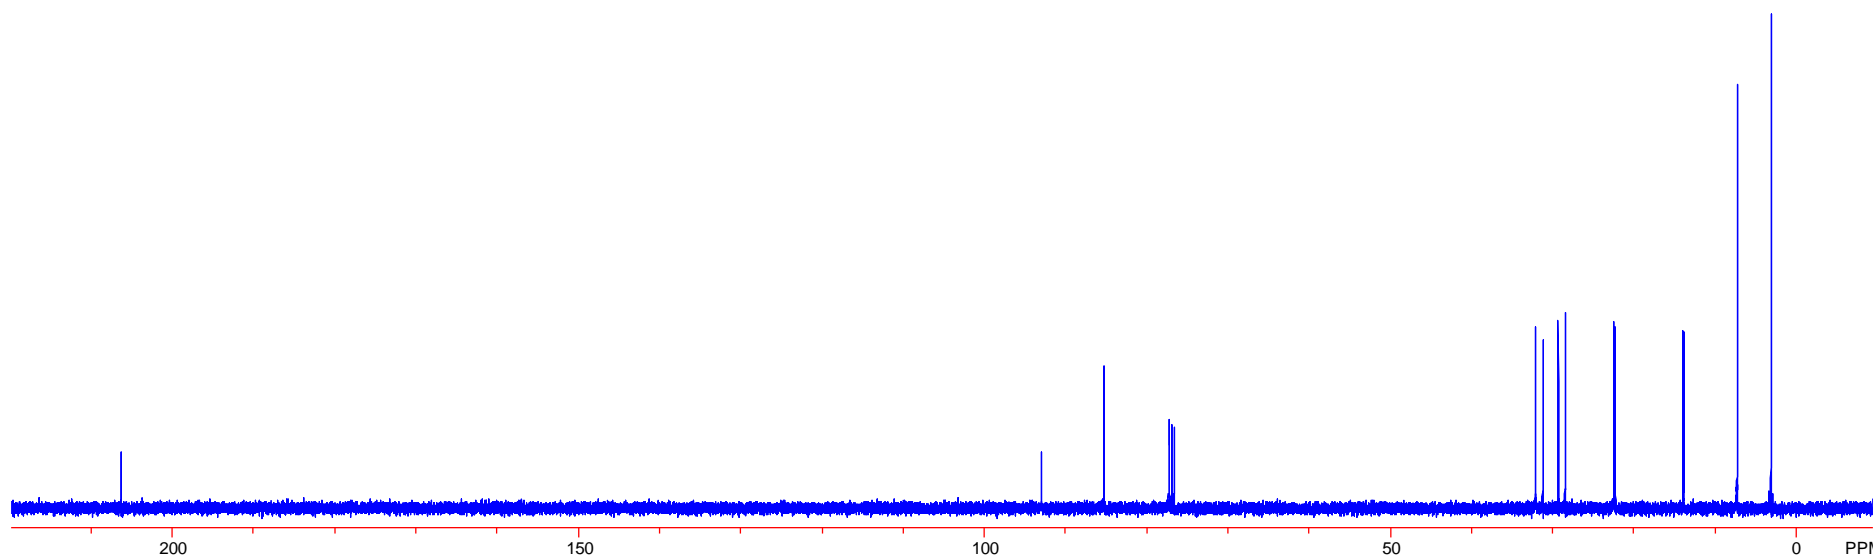



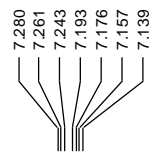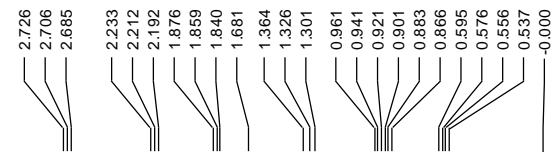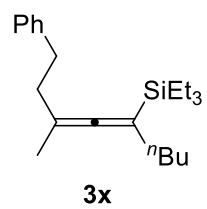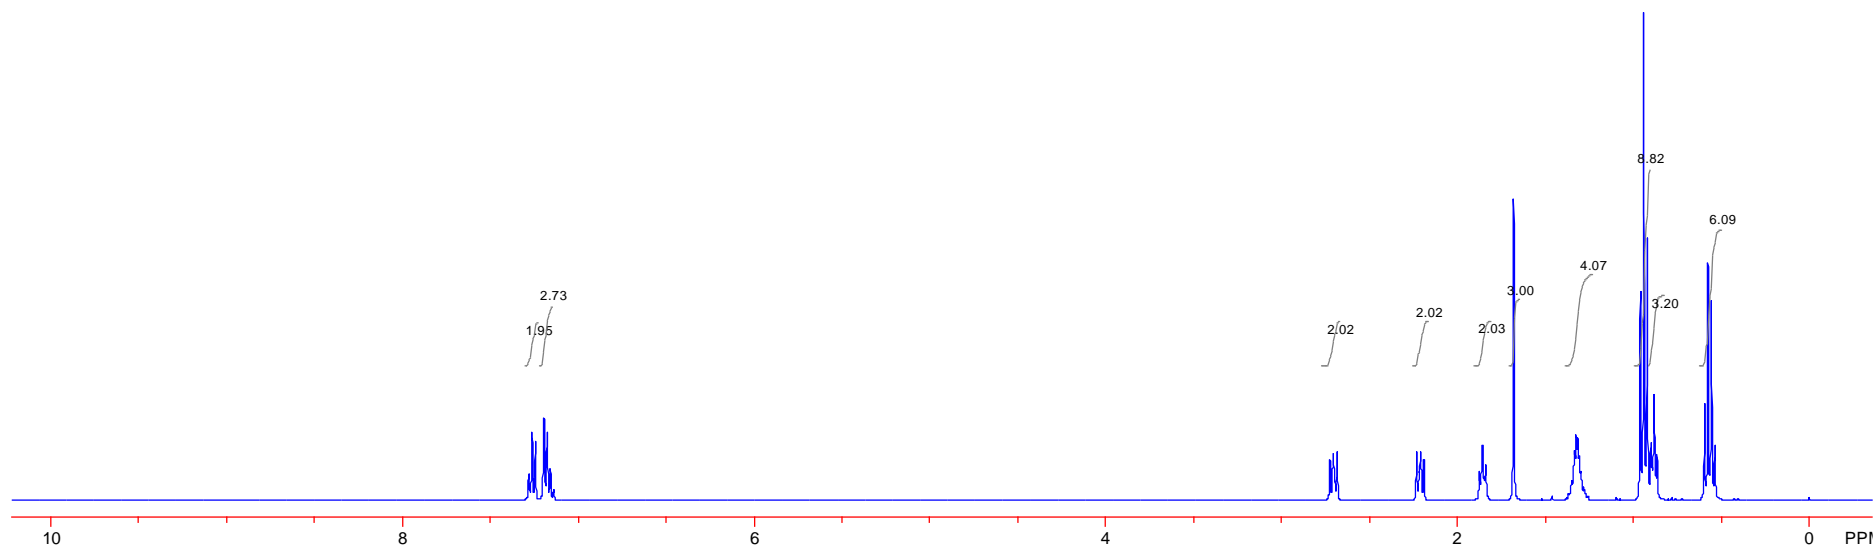

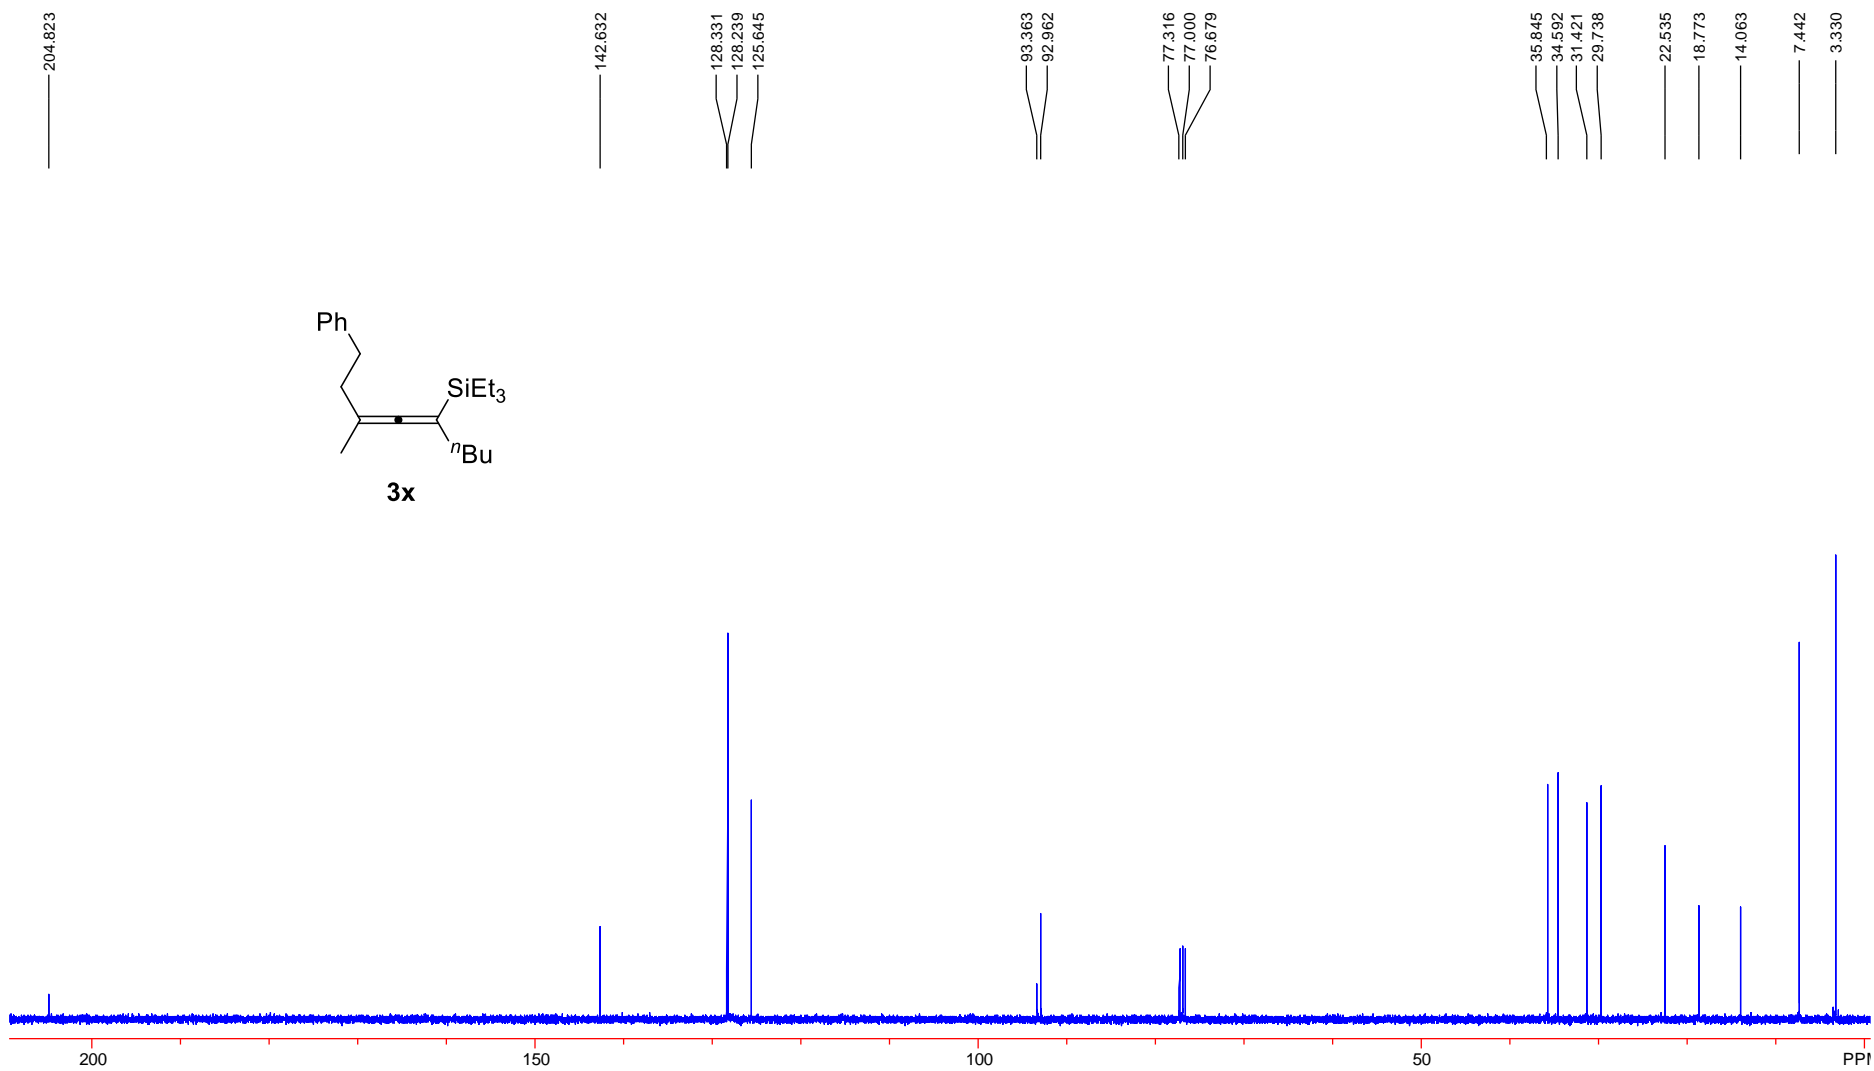

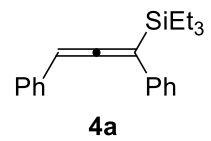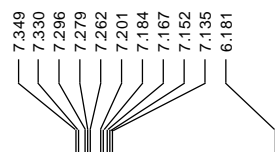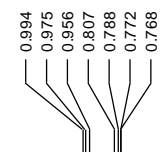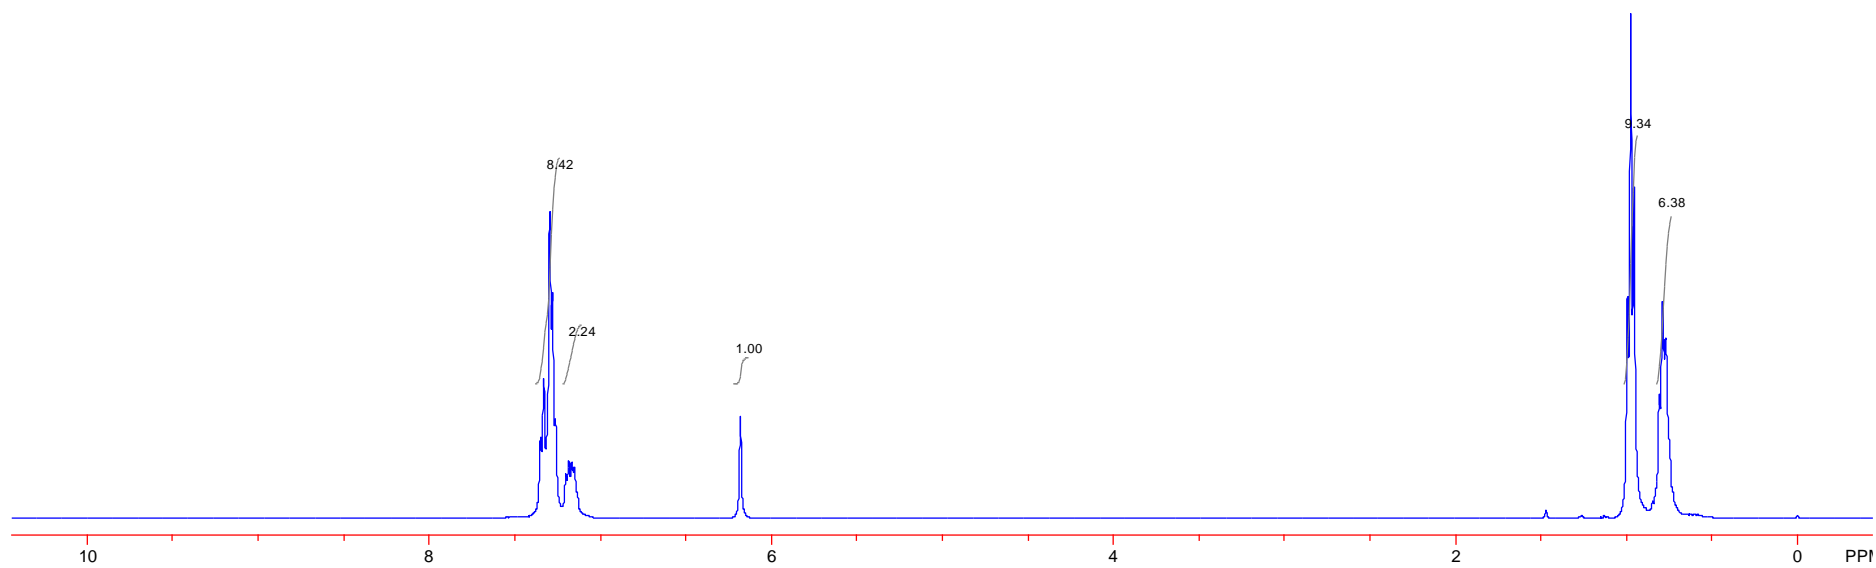

210.164

137.066  
134.815  
128.646  
128.537  
127.646  
126.504  
126.286  
126.169

101.615

90.685

77.319  
77.000  
76.681

7.424  
3.926

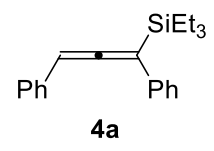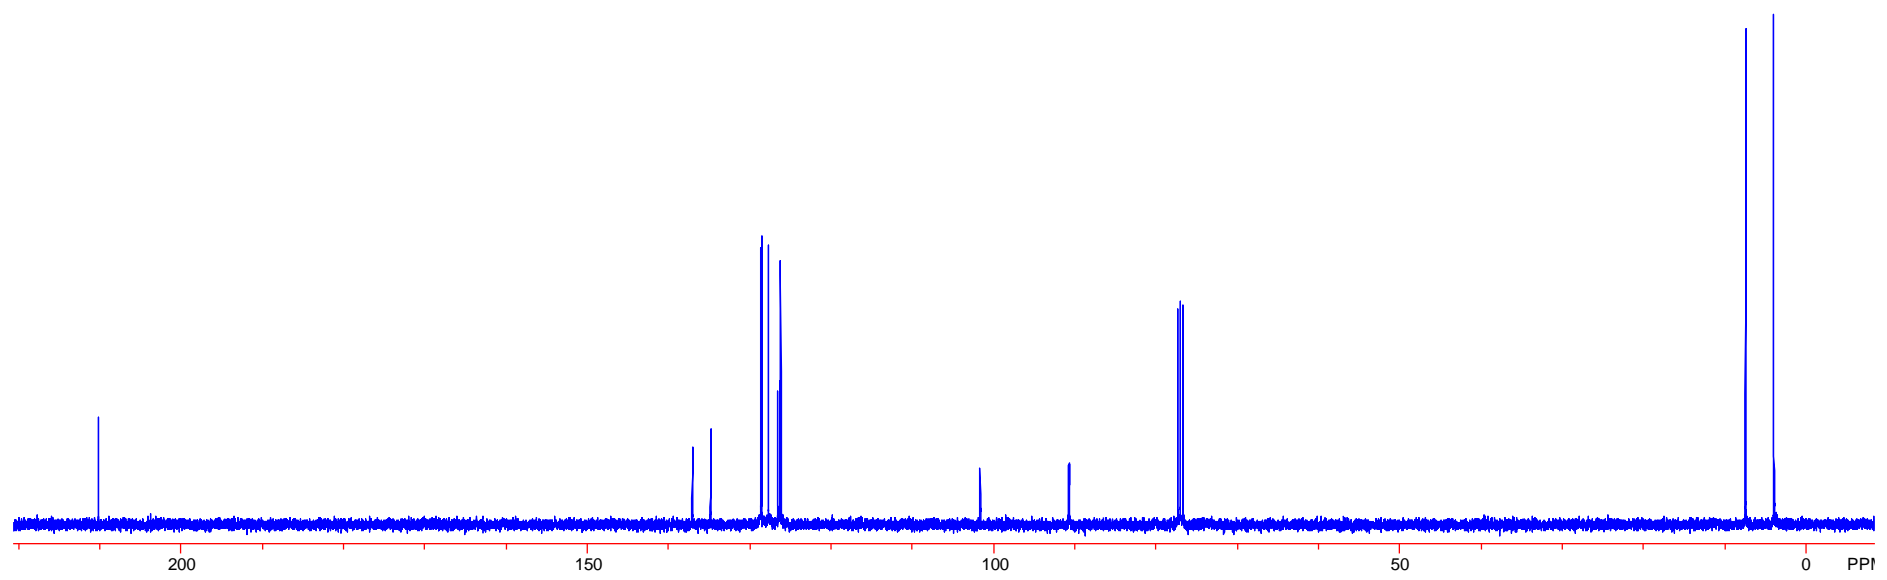

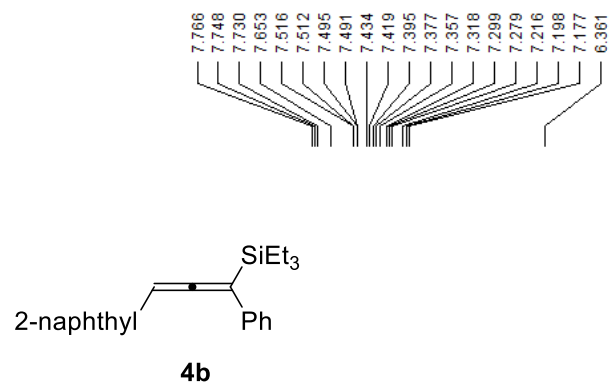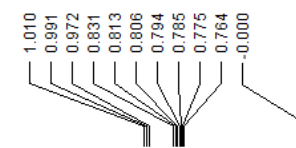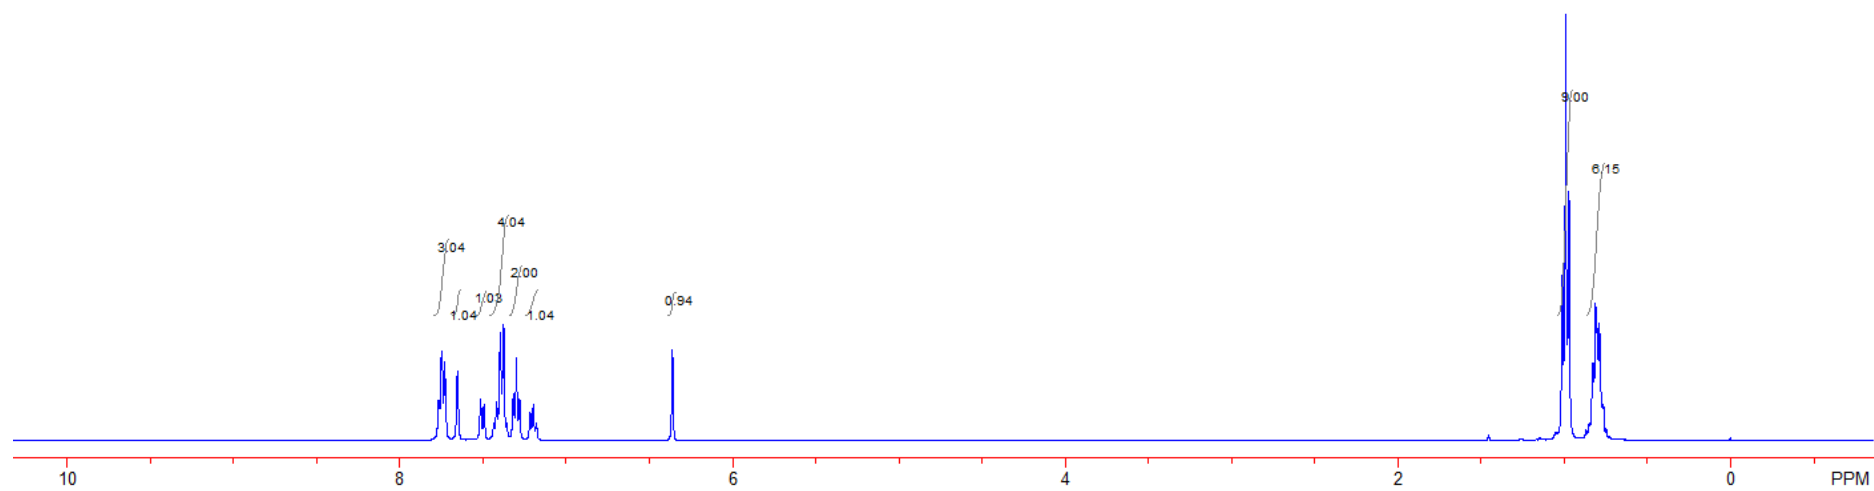

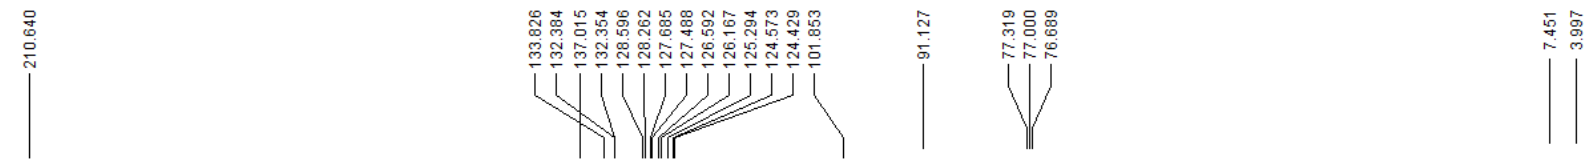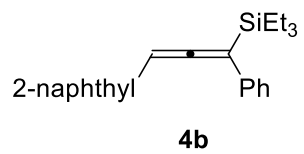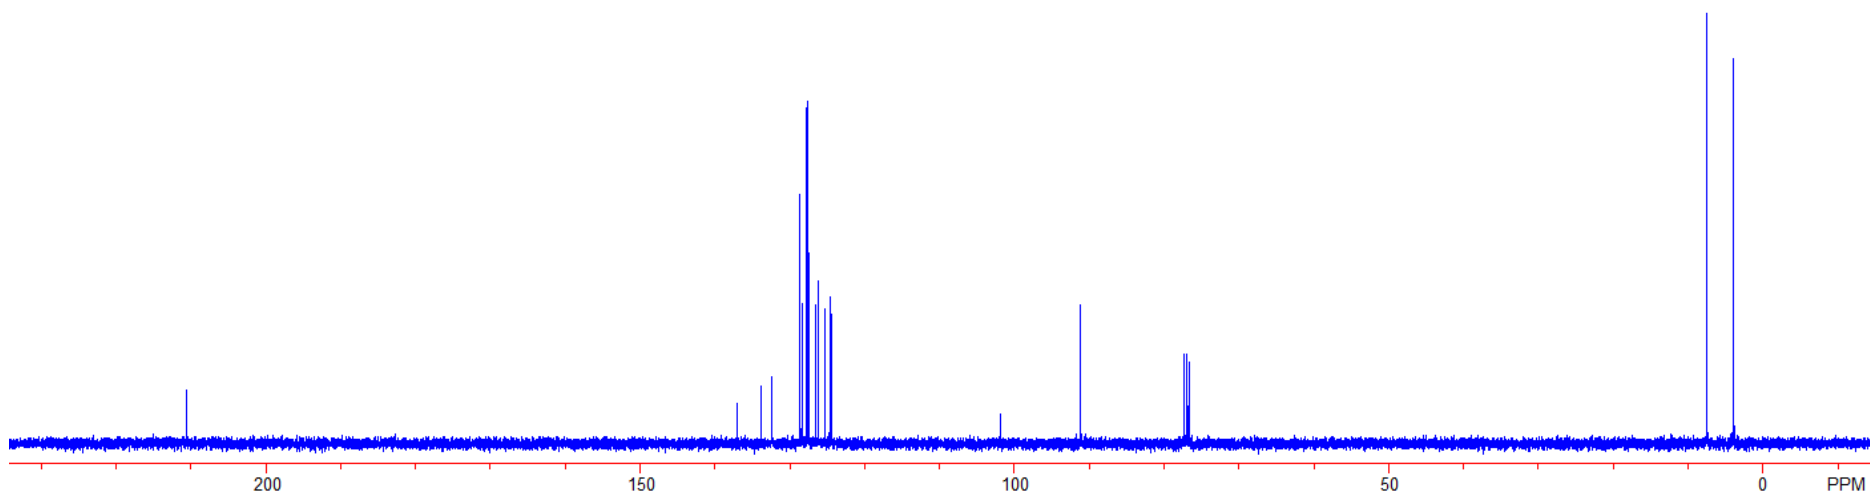

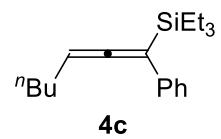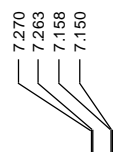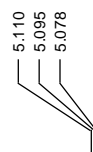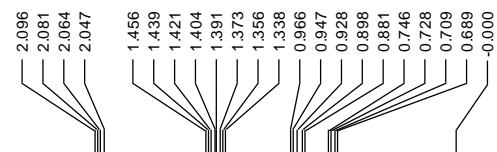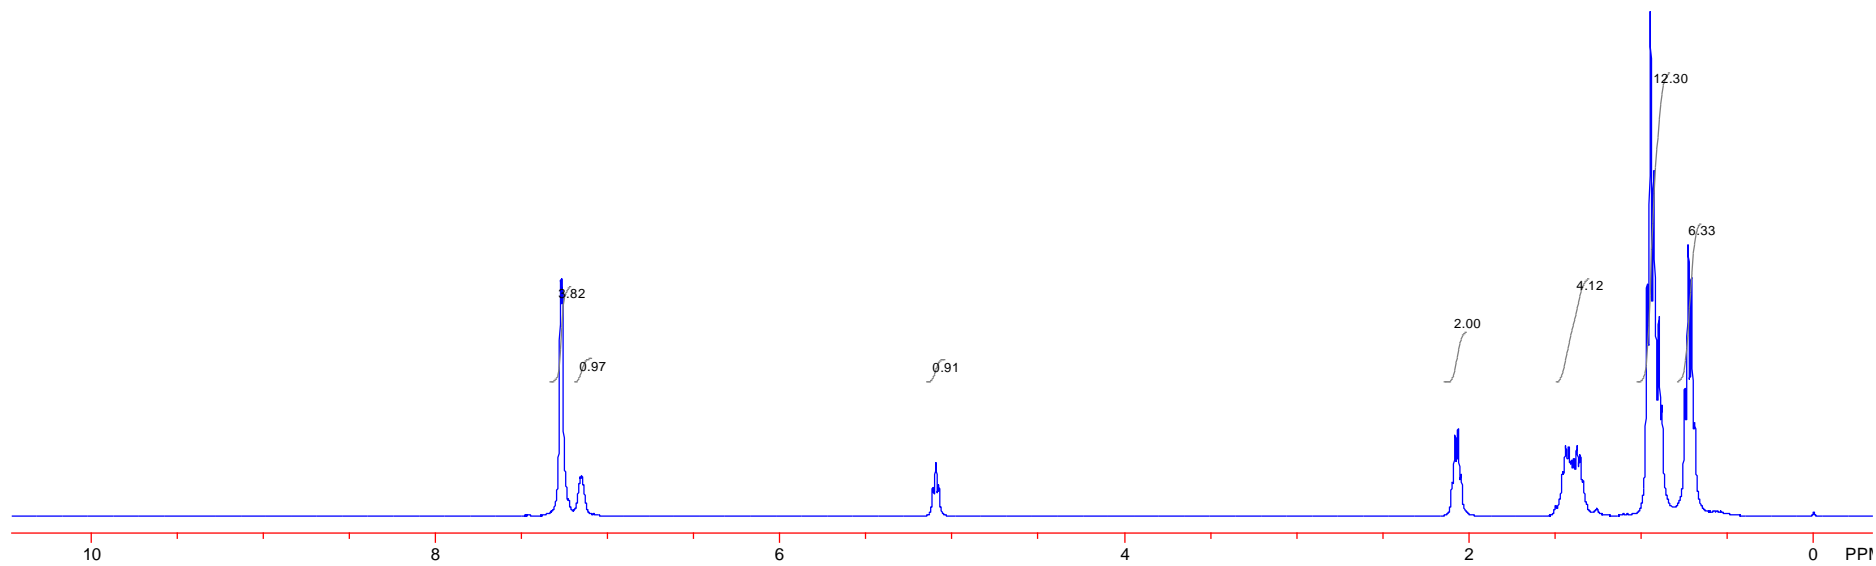

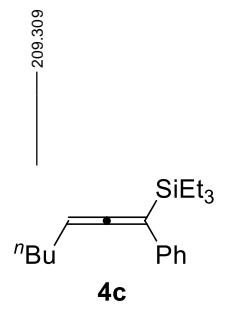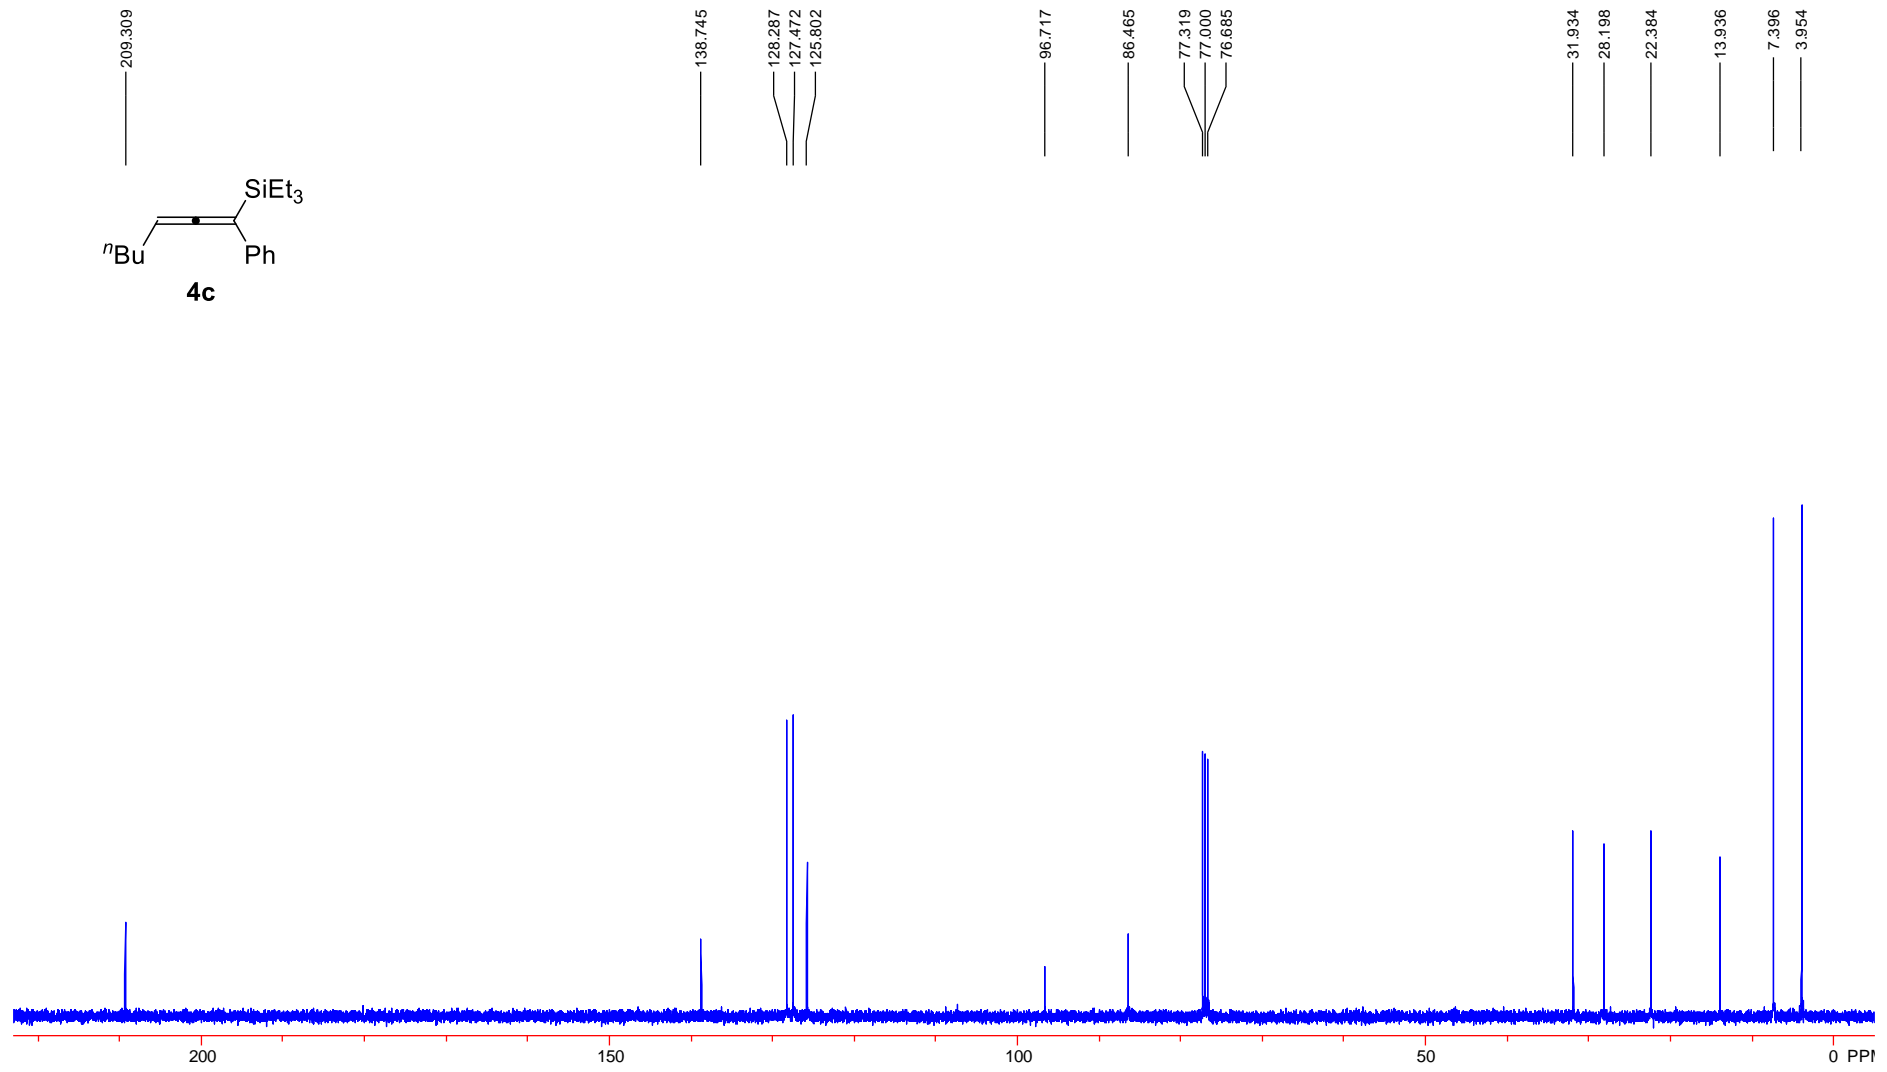



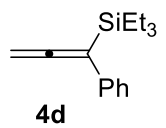

7.282  
7.270  
7.221  
7.187  
7.166  
7.144

4.637

0.975  
0.956  
0.935  
0.771  
0.751  
0.732  
0.712

0.000

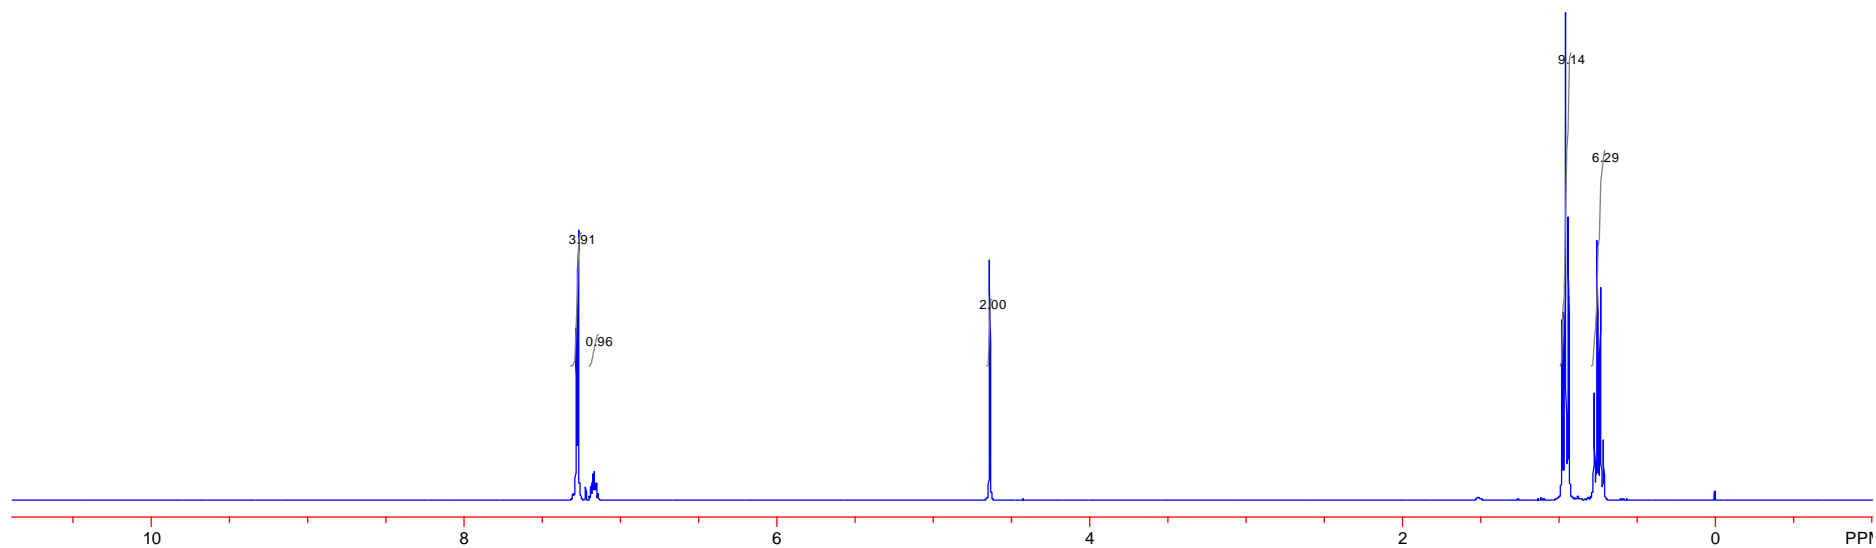

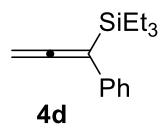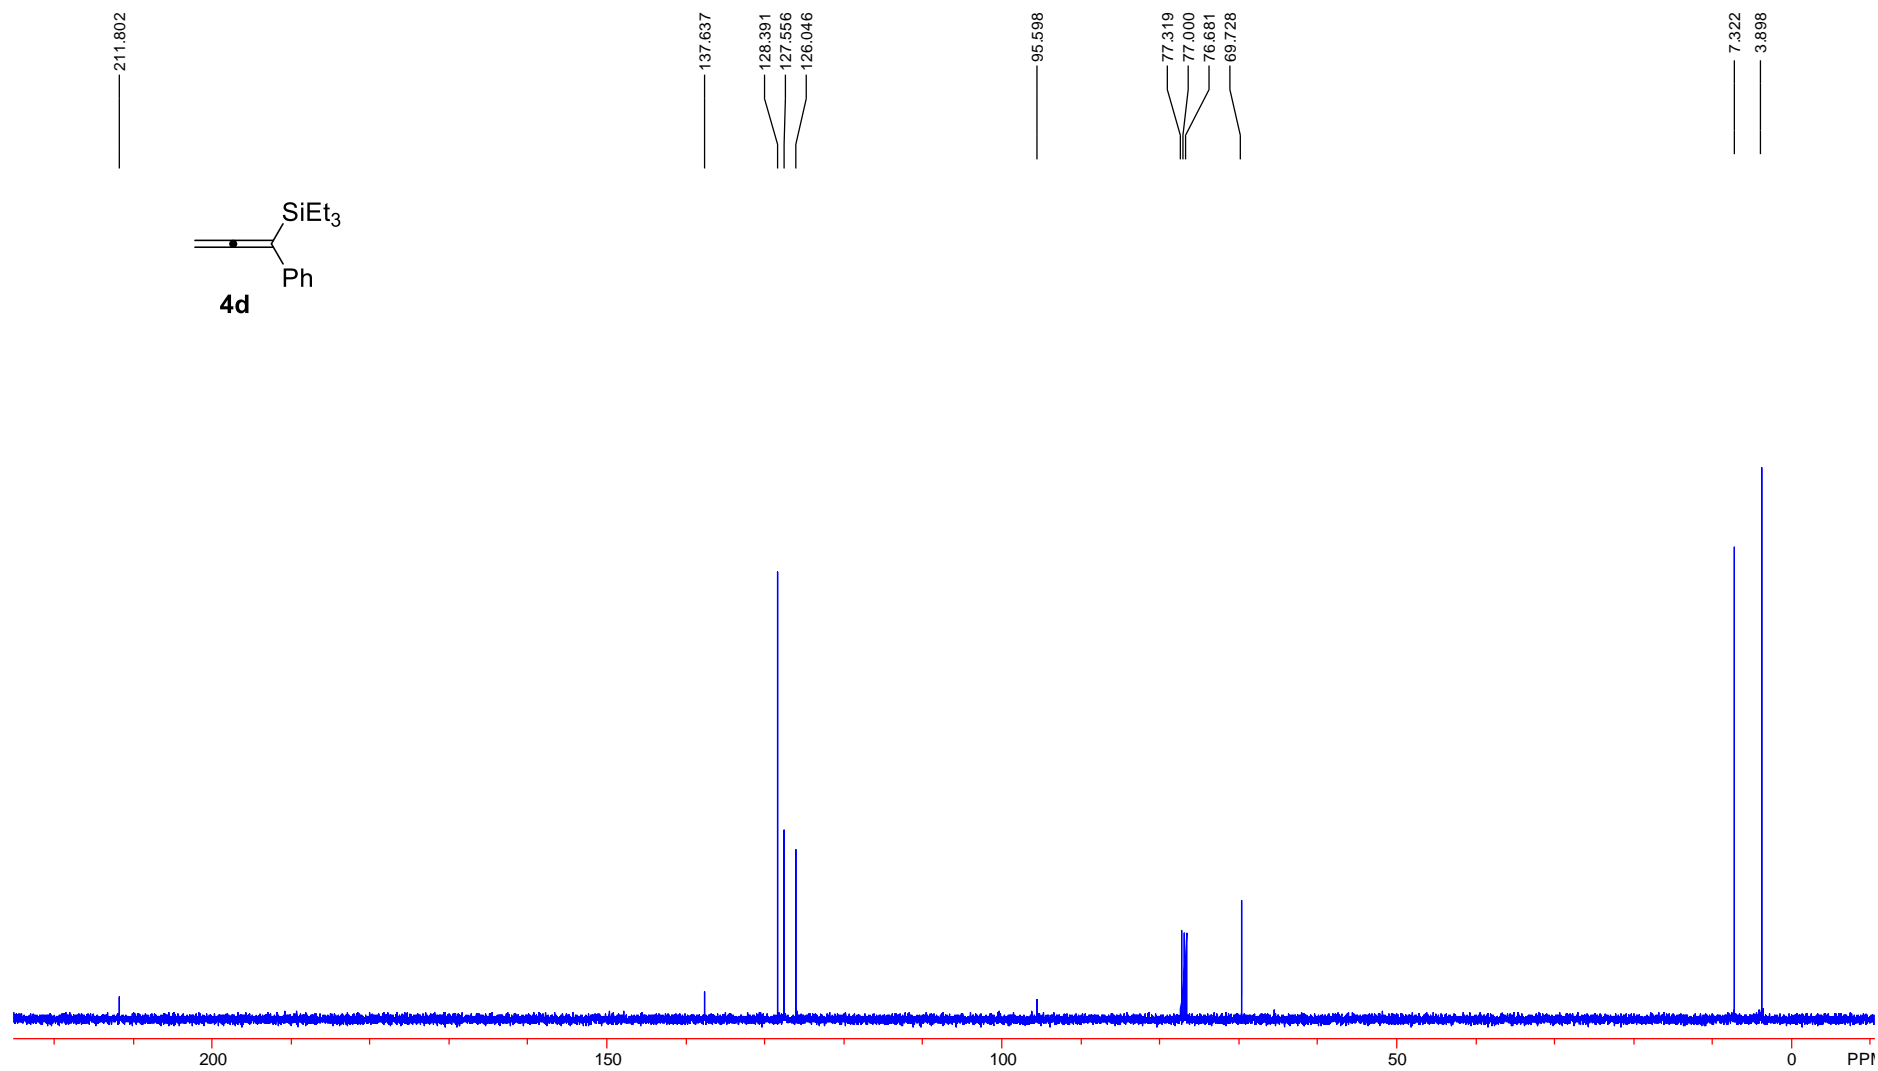

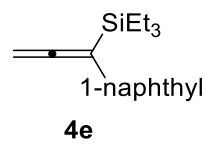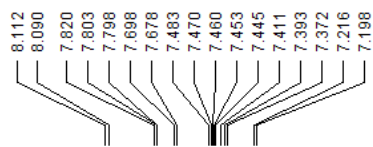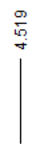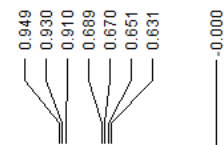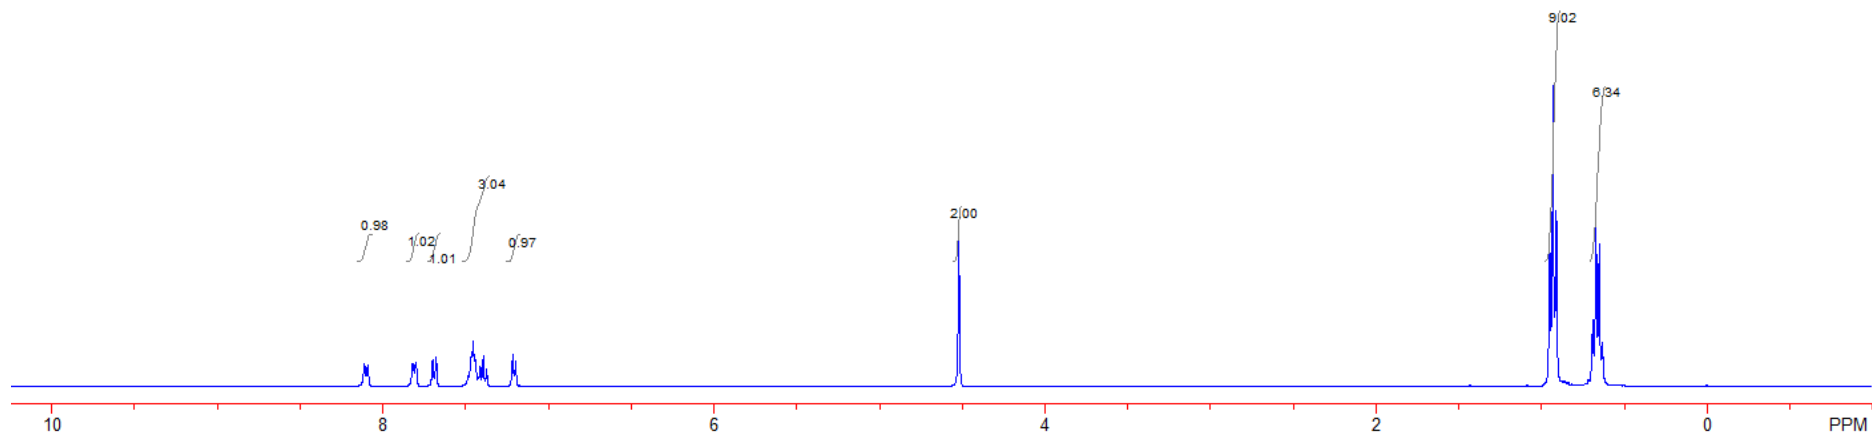

209.911

135.496  
133.971  
131.572  
128.270  
126.372  
125.909  
125.628  
125.492  
125.317  
124.892

93.457

77.319  
77.000  
76.689  
67.739

7.292  
3.496

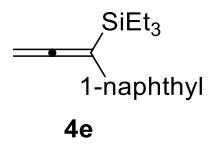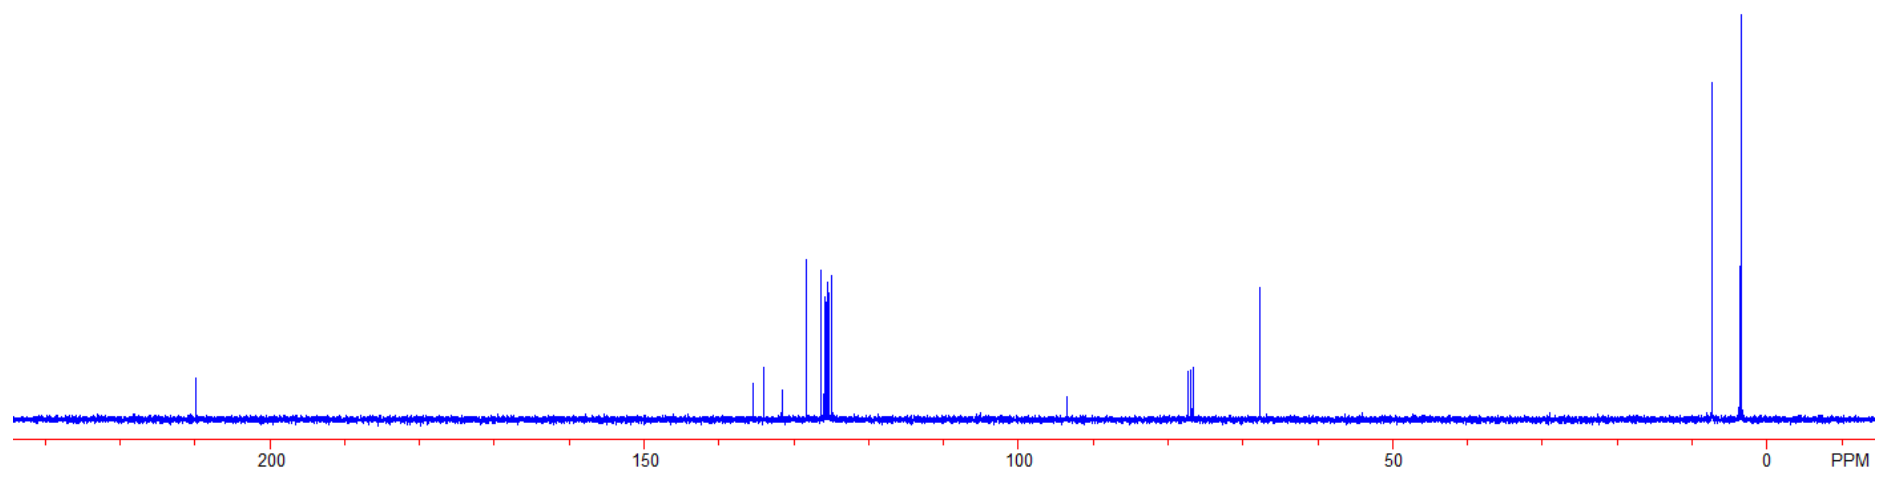

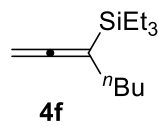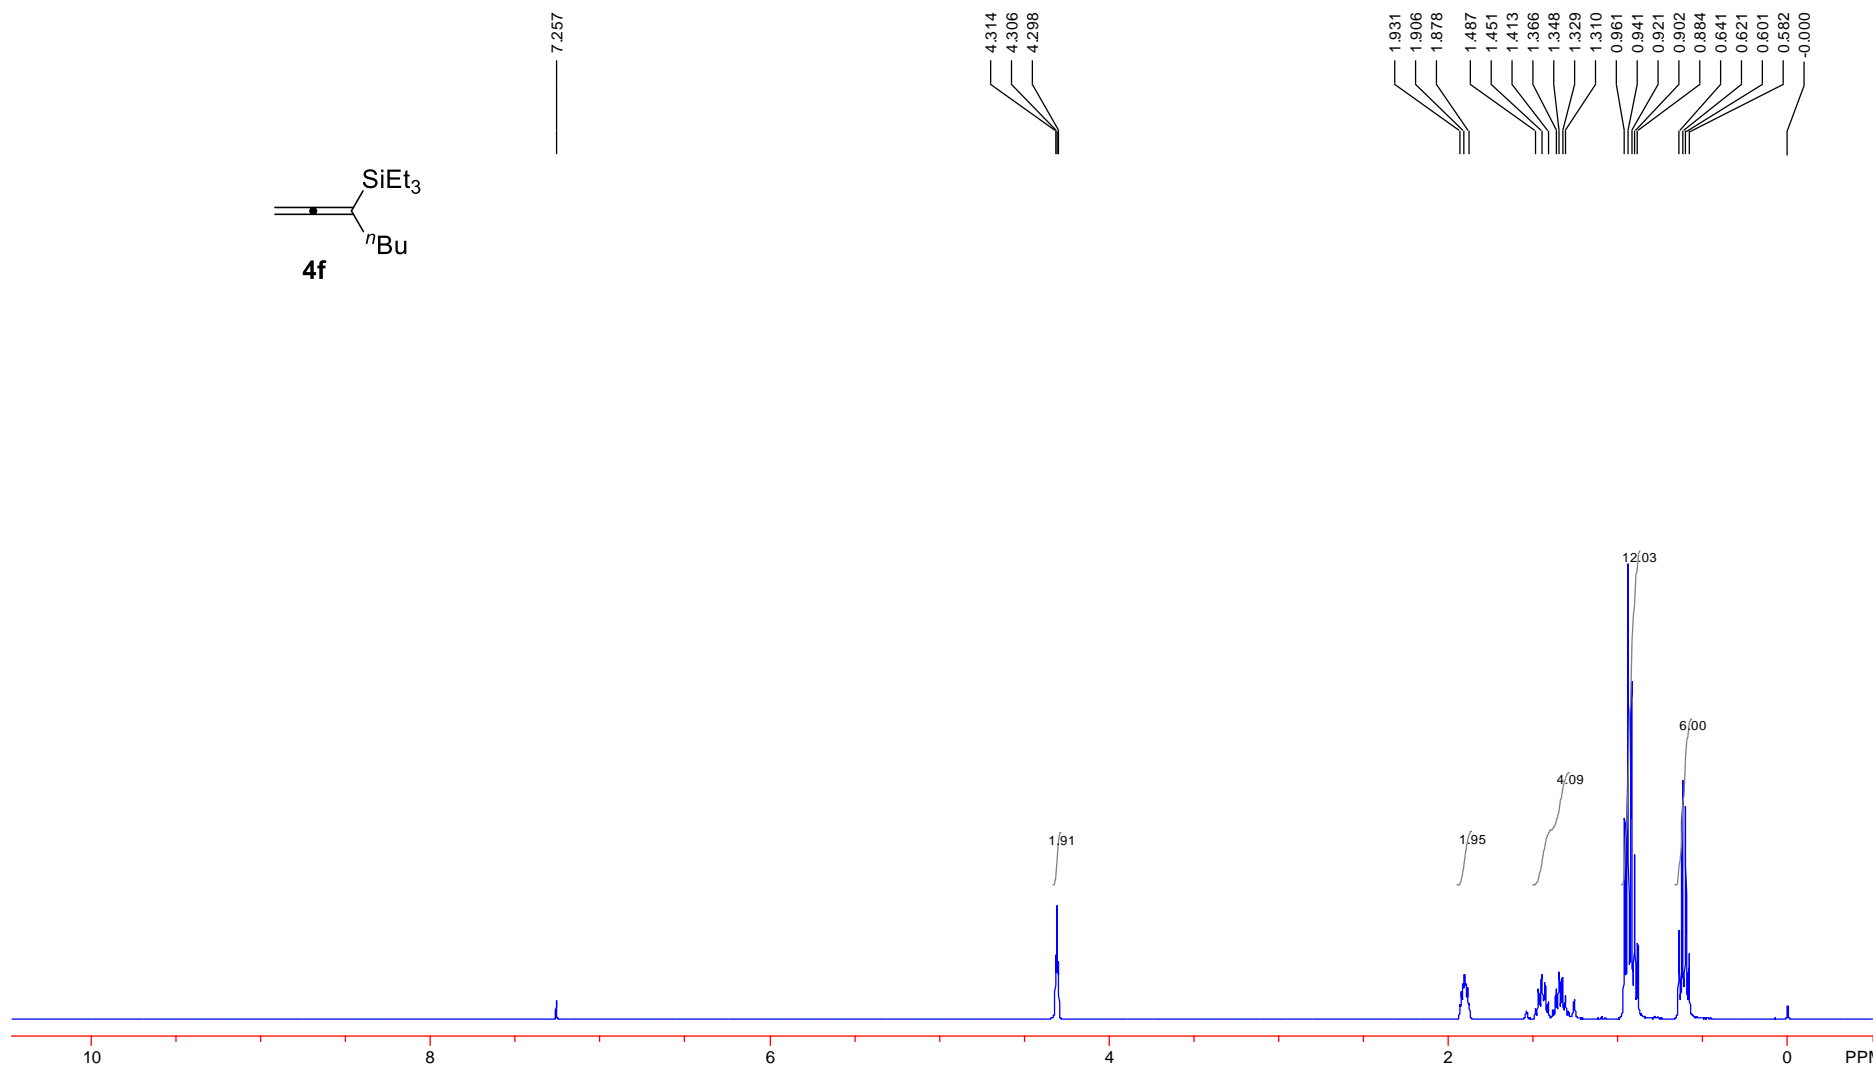

208.963

91.514

77.319

77.000

76.681

68.528

31.120

28.653

22.512

13.956

7.337

3.116

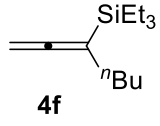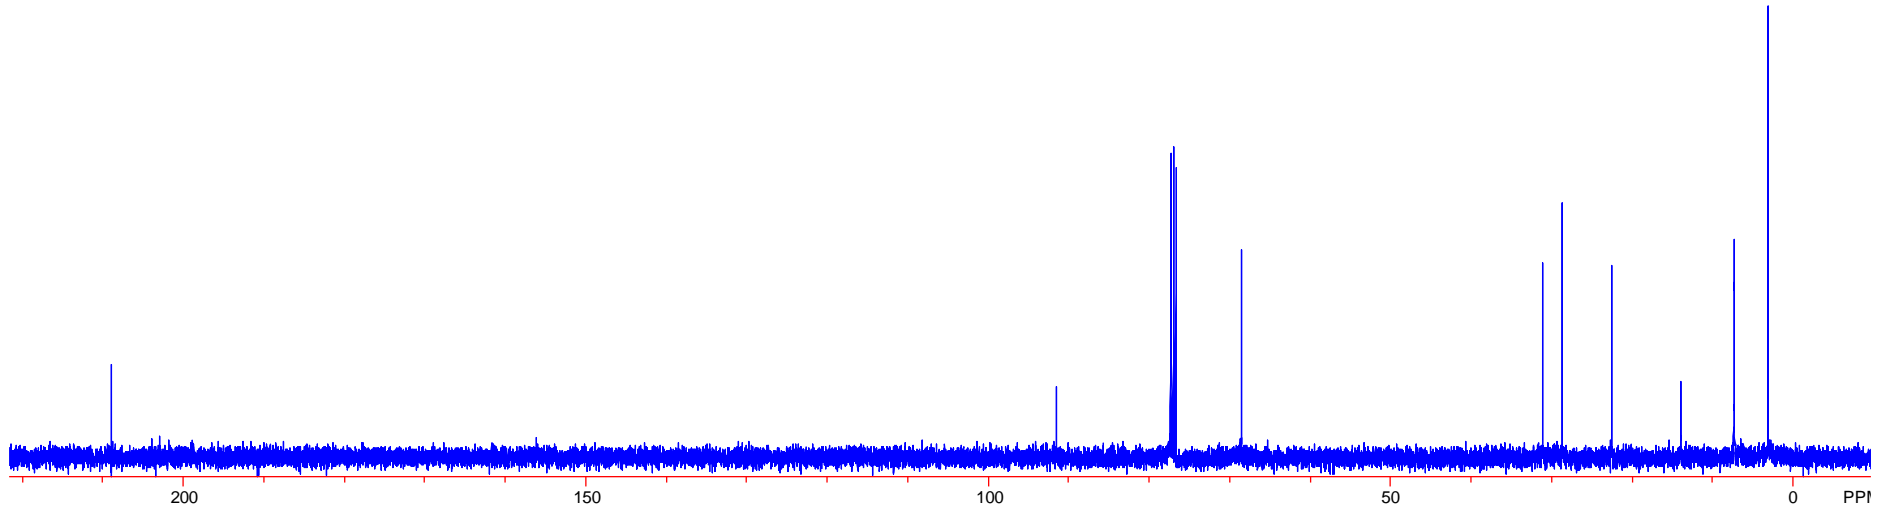

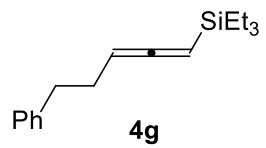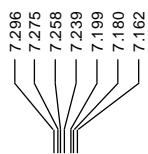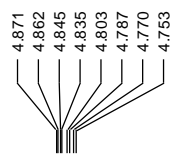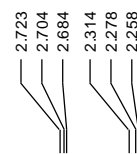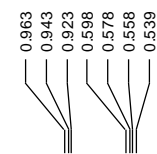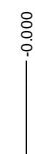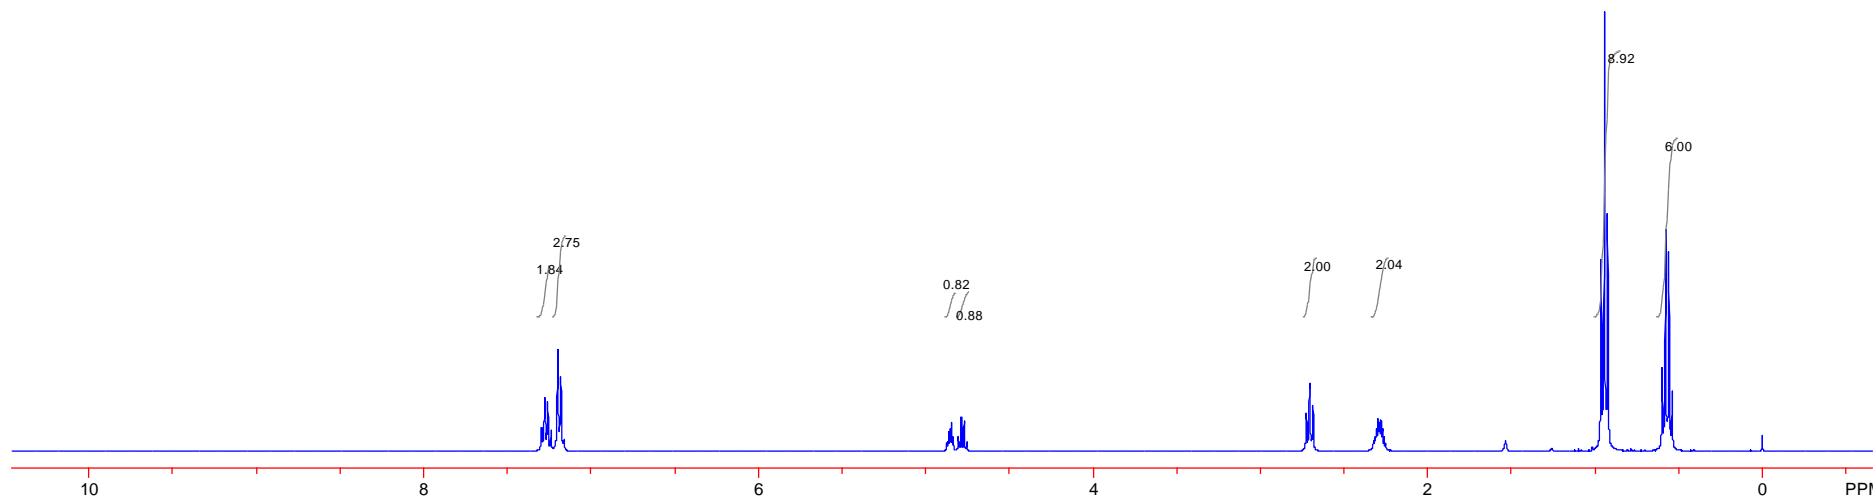

210.592

141.981

128.465

128.267

125.790

82.277

78.755

77.319

77.000

76.681

36.134

30.018

7.279

3.805

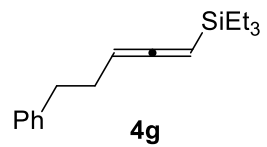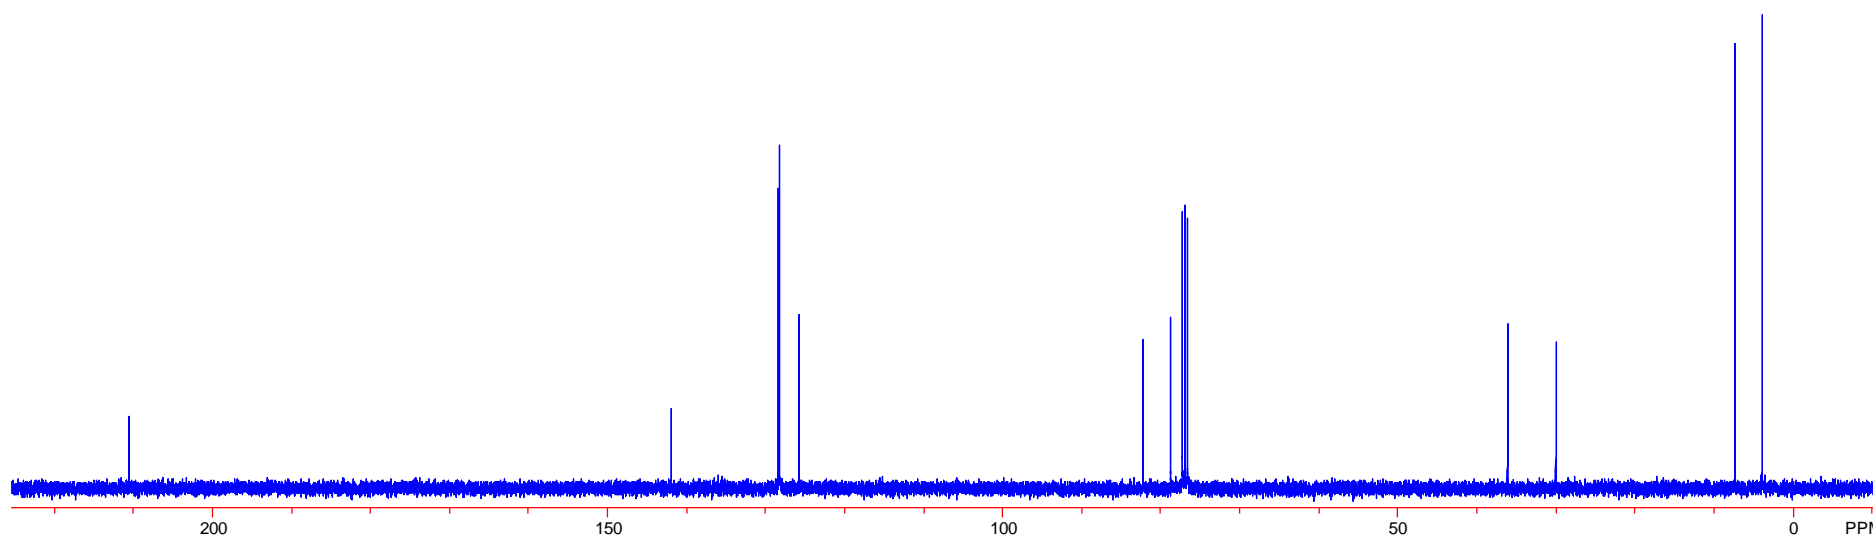



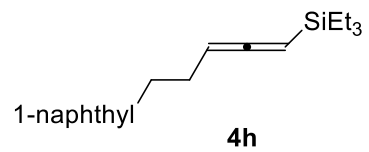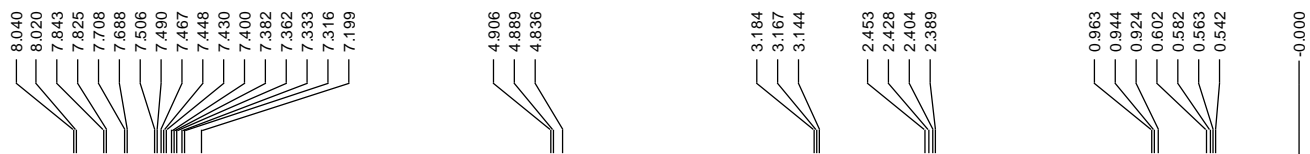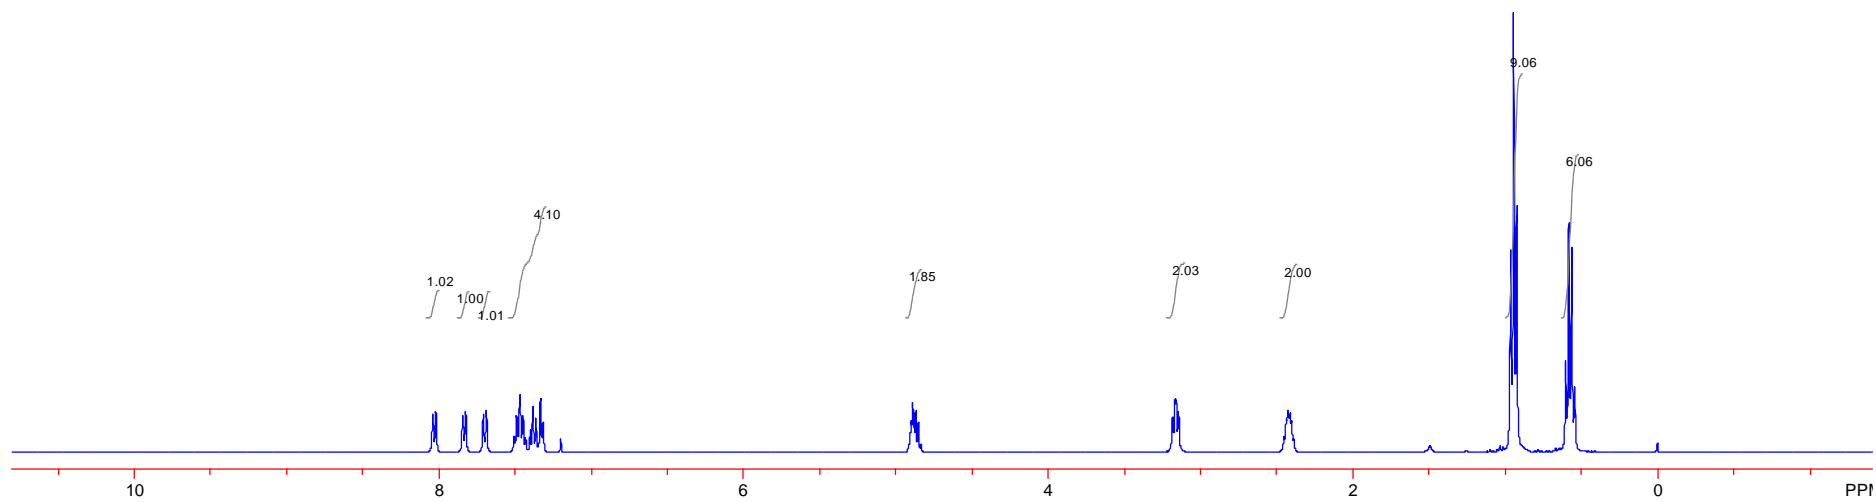

210.572

138.032  
133.872  
131.860  
128.740  
126.638  
126.030  
125.696  
125.514  
125.378  
123.738

82.519  
78.981  
77.319  
77.000  
76.689

33.223  
29.260

7.292  
3.838

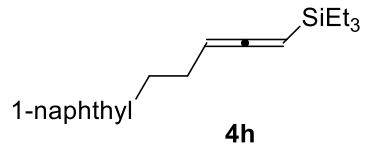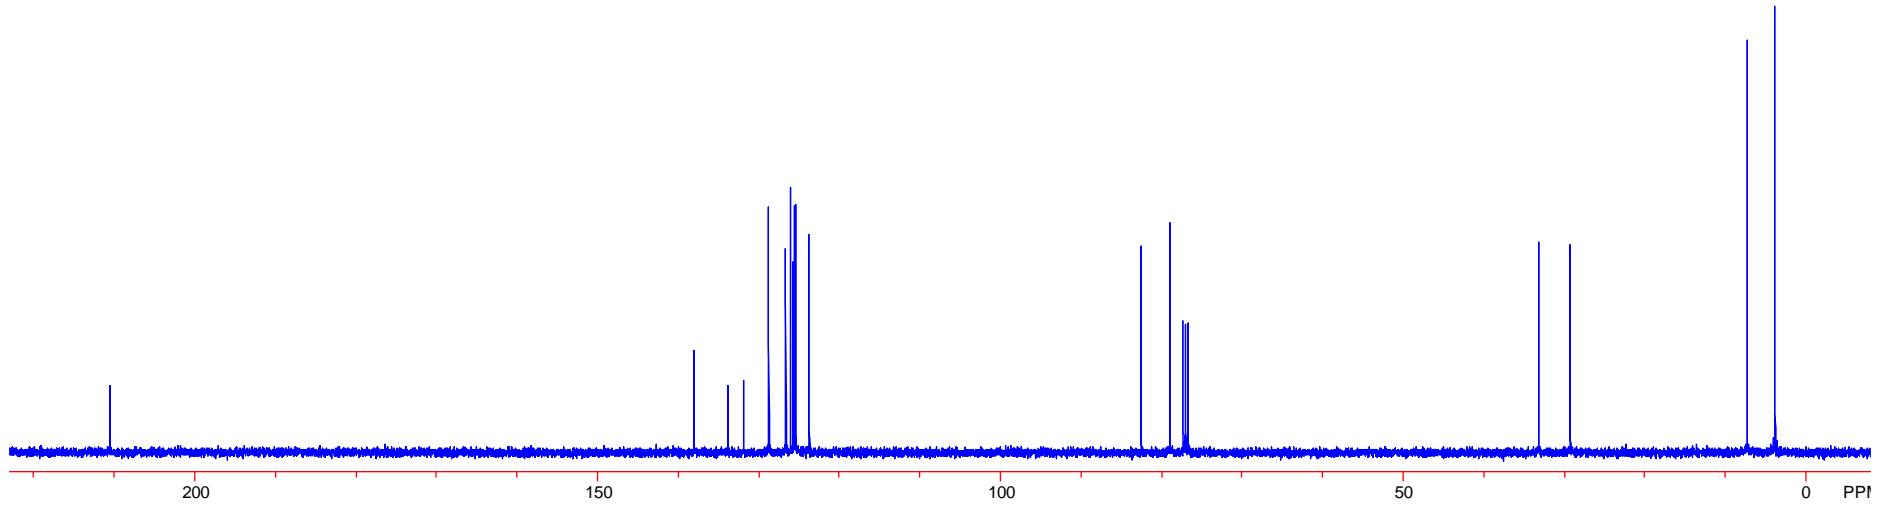

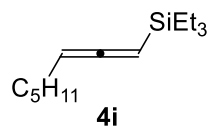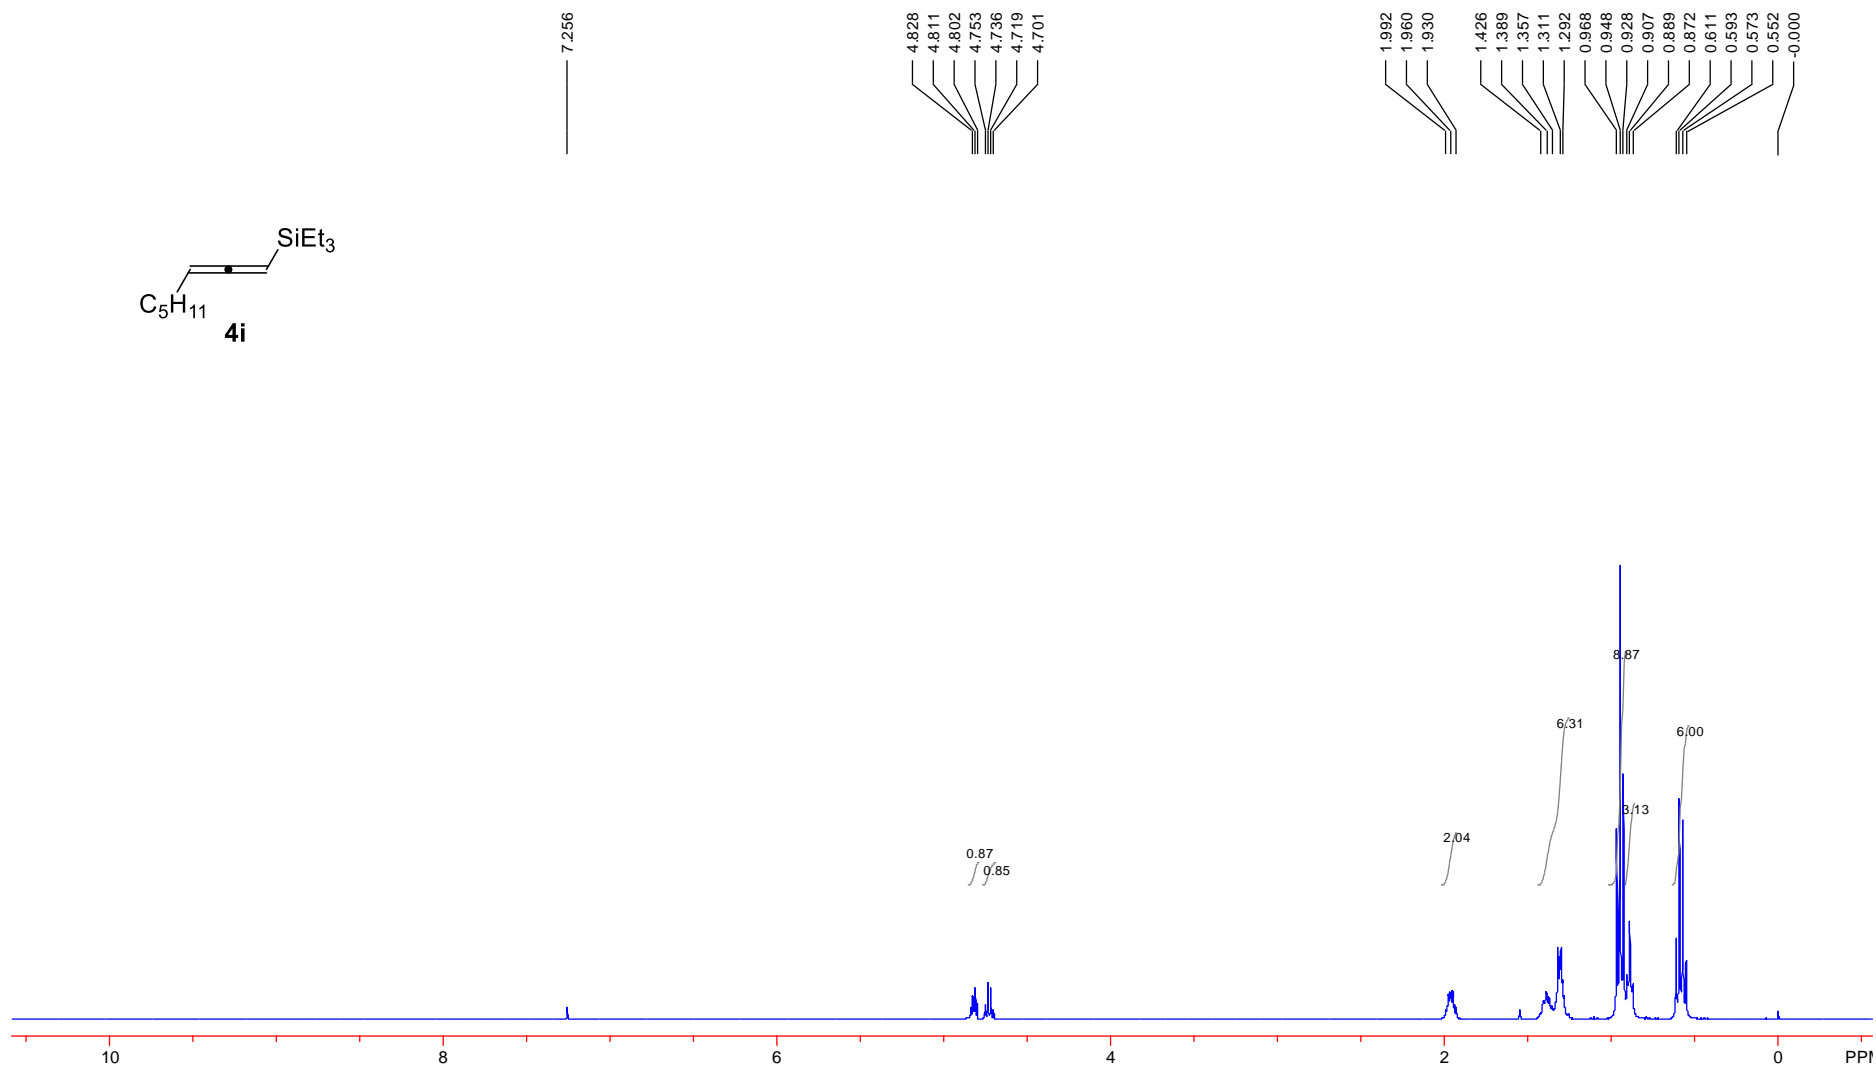

210.822

82.943  
78.166  
77.319  
77.000  
76.685

31.442  
29.473  
28.037

22.534

14.053

7.267  
3.854

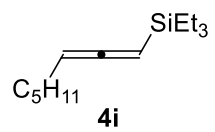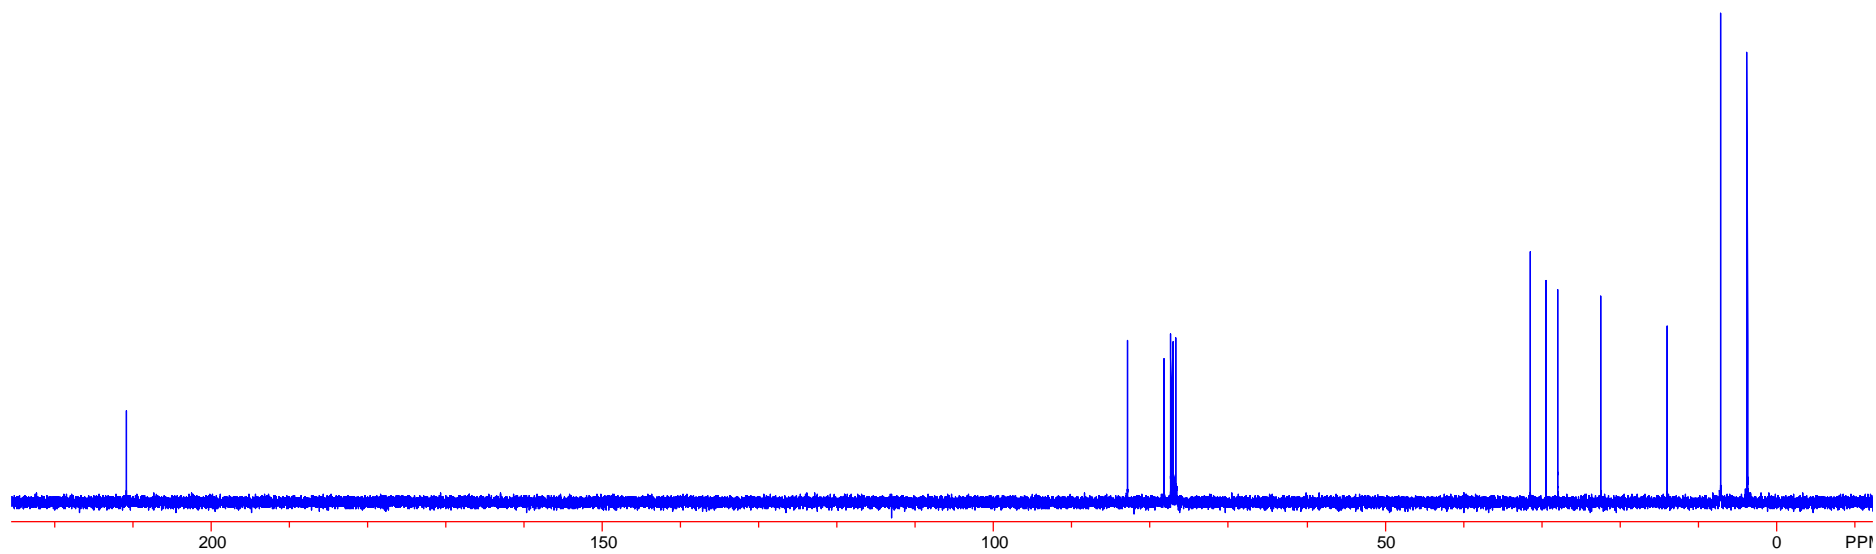

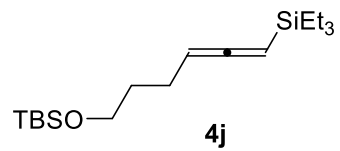

7.262

4.853  
4.835  
4.826  
4.768  
4.751  
4.733  
4.716

3.659  
3.643  
3.626

2.051  
2.024  
1.997  
1.649  
1.621  
1.588

0.966  
0.946  
0.927  
0.894  
0.611  
0.592  
0.572  
0.552  
0.048  
0.000

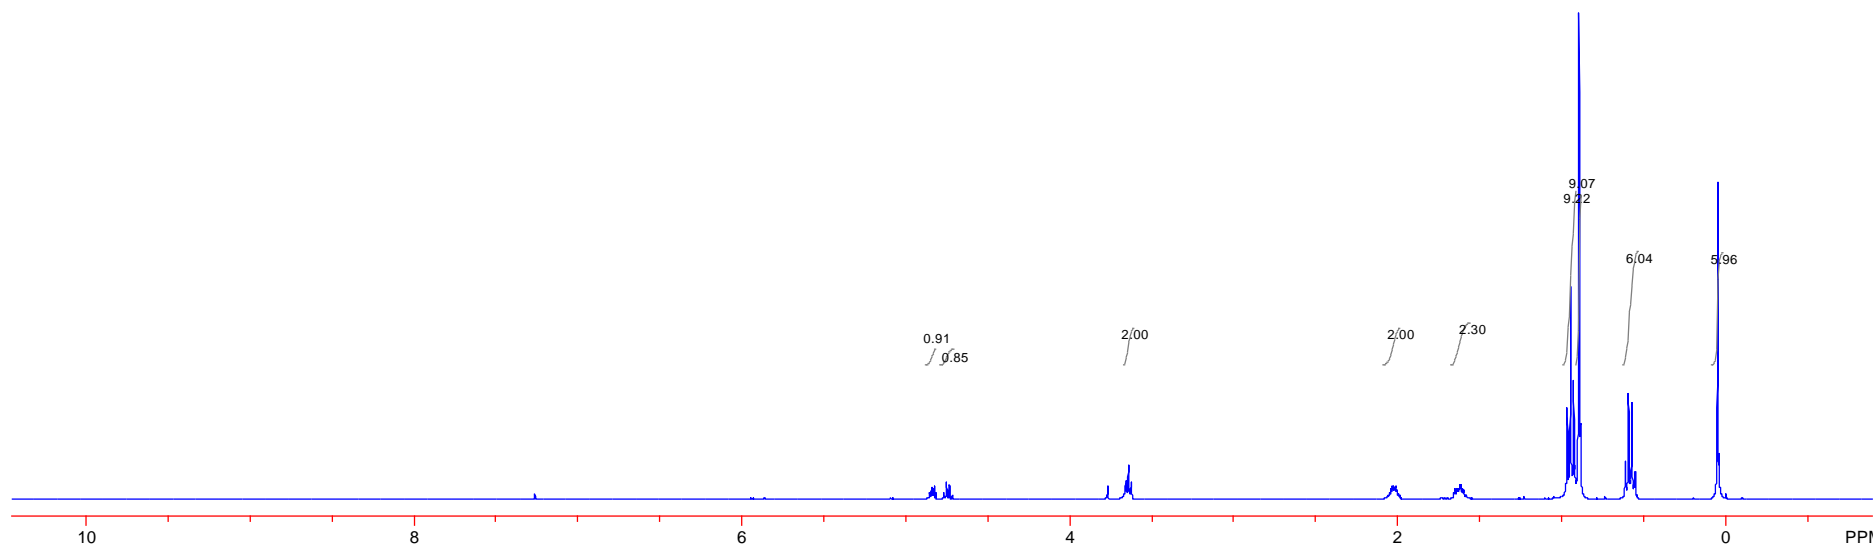

210.762

82.459  
78.525  
77.315  
77.000  
76.677  
62.625

32.805  
25.931  
24.325  
18.325

7.259  
3.829  
-5.321

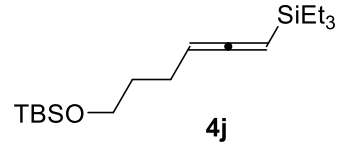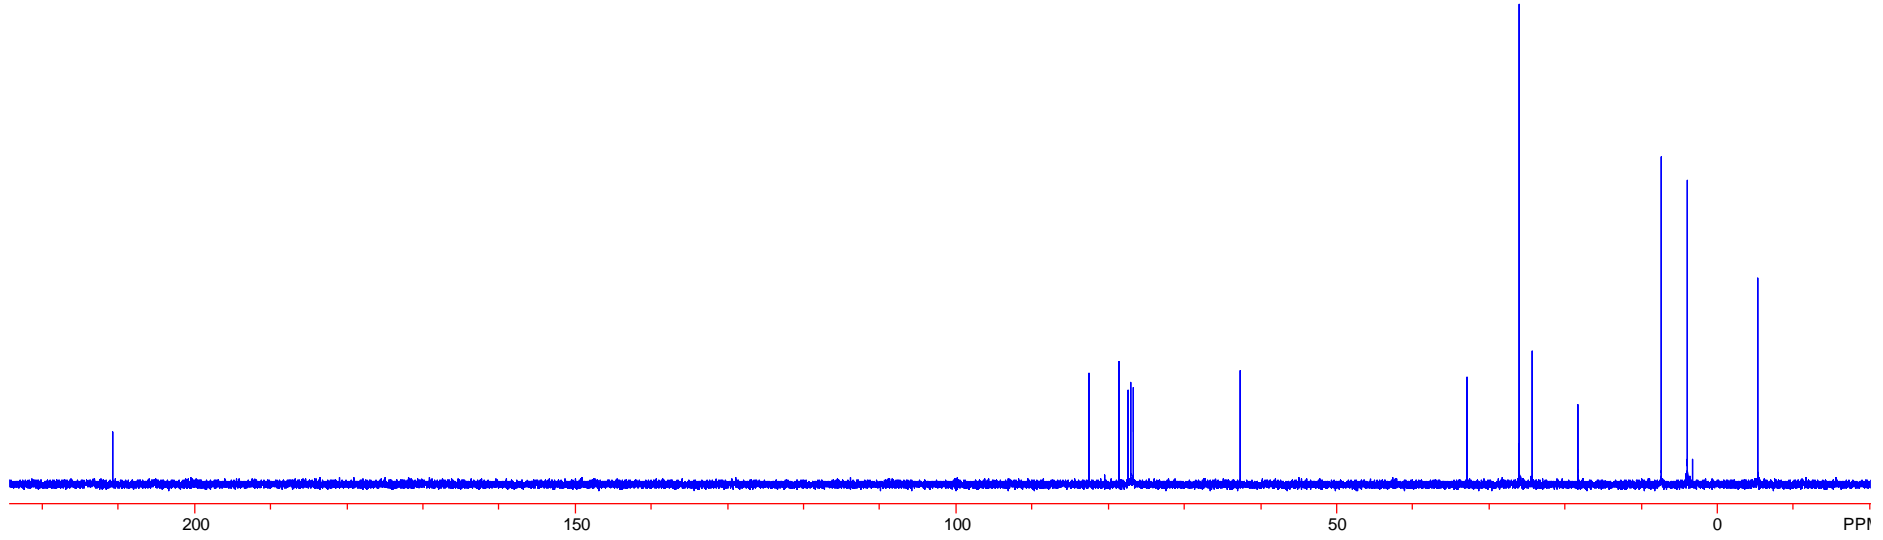

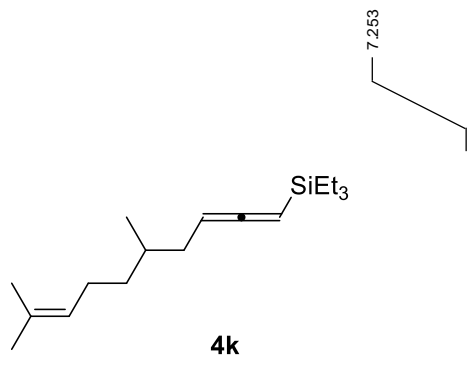

4k

7.253

5.117  
5.100  
5.082  
4.808  
4.793  
4.777  
4.709  
4.694  
4.676  
4.658

2.025  
1.977  
1.959  
1.838  
1.812  
1.682  
1.603  
1.516  
1.483  
1.436  
1.383  
1.349  
1.192  
1.155  
1.106  
0.967  
0.947  
0.927  
0.915  
0.899  
0.612  
0.593  
0.573  
0.552  
0.000

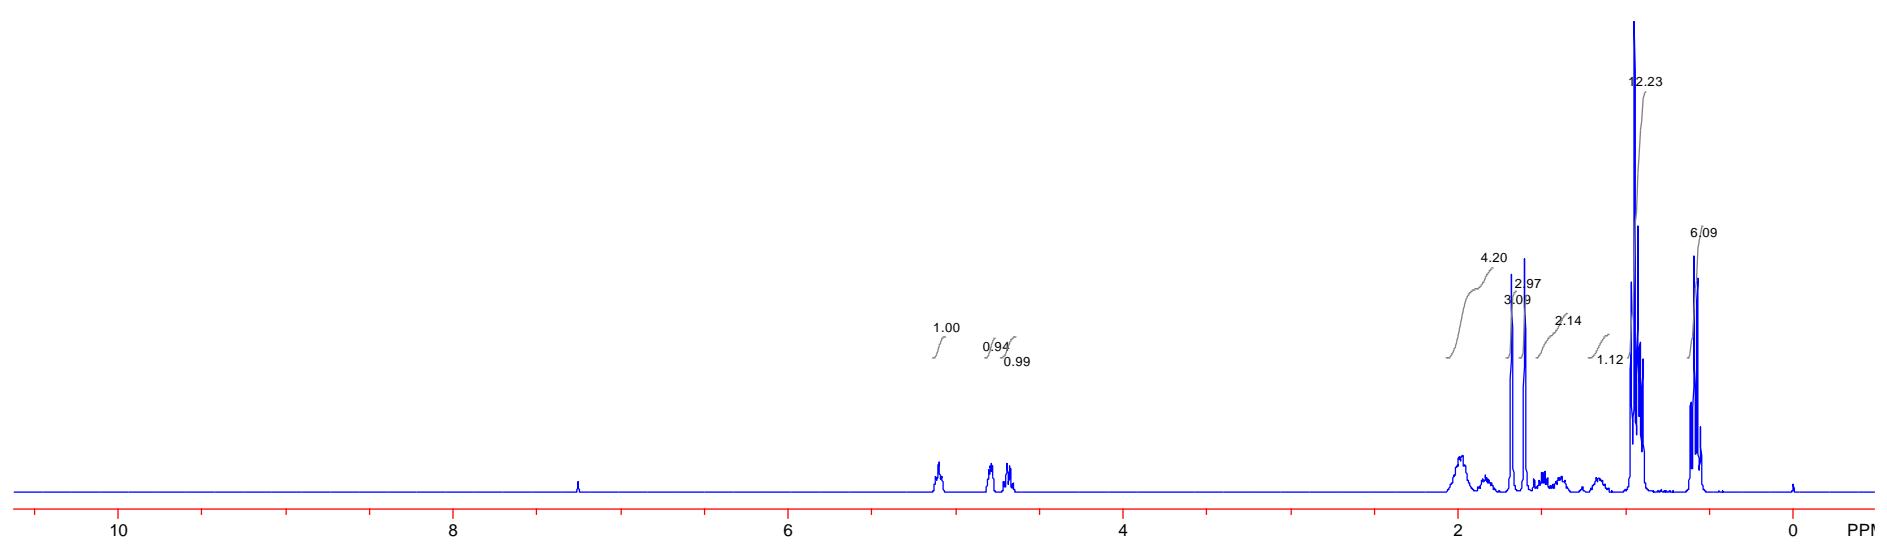

211.308

131.048

124.877

81.190  
80.993  
77.418  
77.364  
77.319  
77.000  
76.681

36.593  
36.555  
35.803  
35.728  
33.336  
33.276  
25.700  
25.654  
25.563  
19.430  
19.399  
17.600  
7.276  
3.876

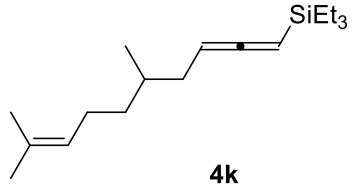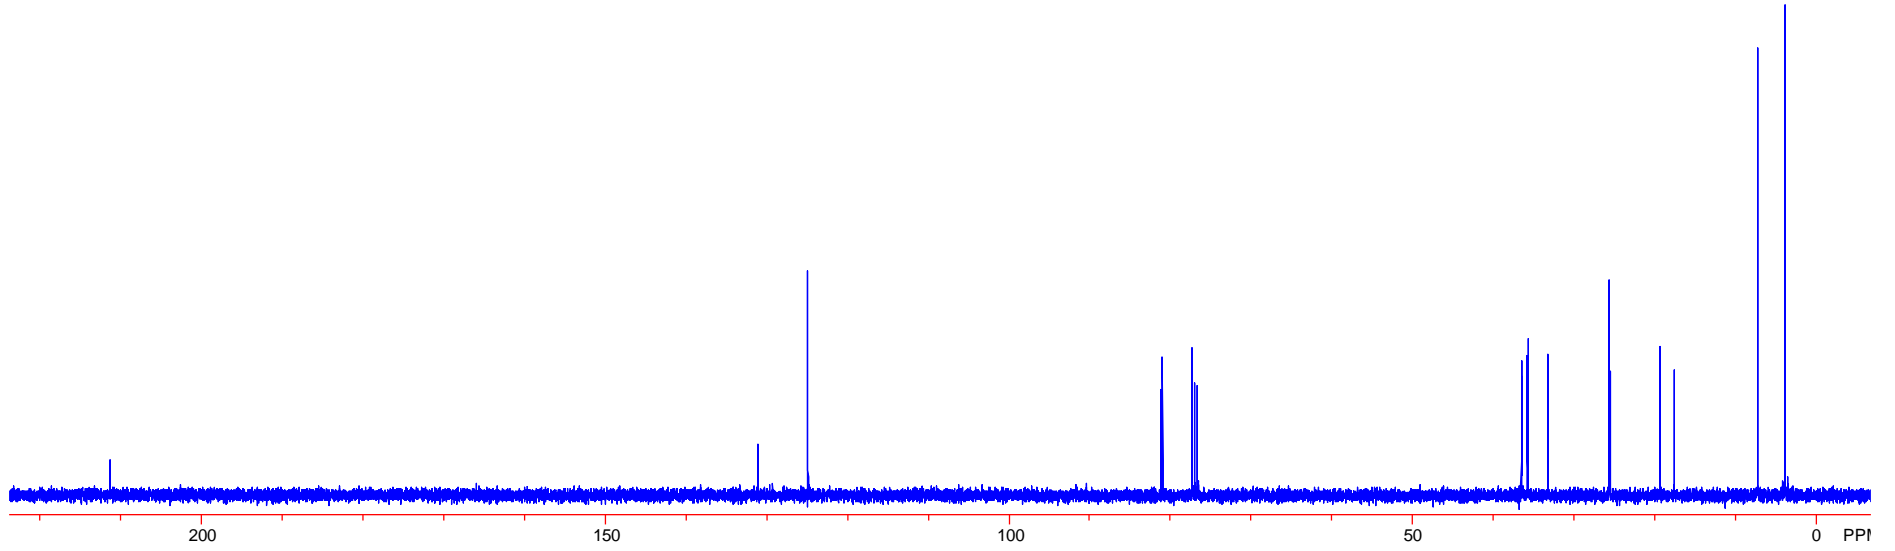



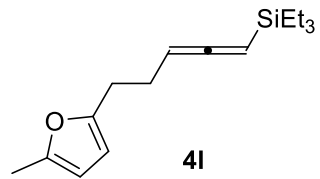

7.242

5.857  
5.837

4.879  
4.879  
4.870  
4.862  
4.853  
4.844  
4.806  
4.789  
4.773  
4.756

2.676  
2.657  
2.637  
2.307  
2.291  
2.272  
2.244

0.964  
0.944  
0.924  
0.605  
0.585  
0.565  
0.546

0.000

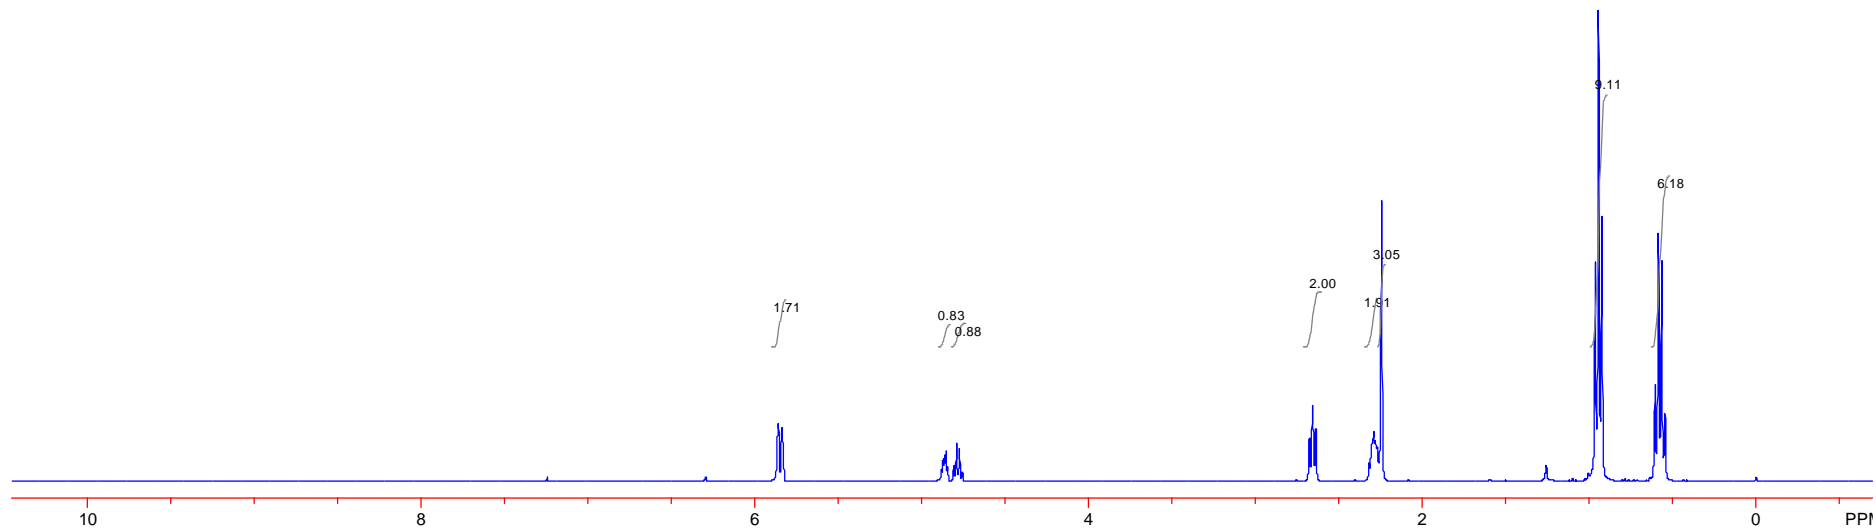

210.528

153.846

150.207

105.770

105.549

82.003

78.916

77.319

77.000

76.685

28.267

26.733

13.468

7.259

3.801

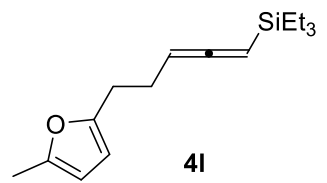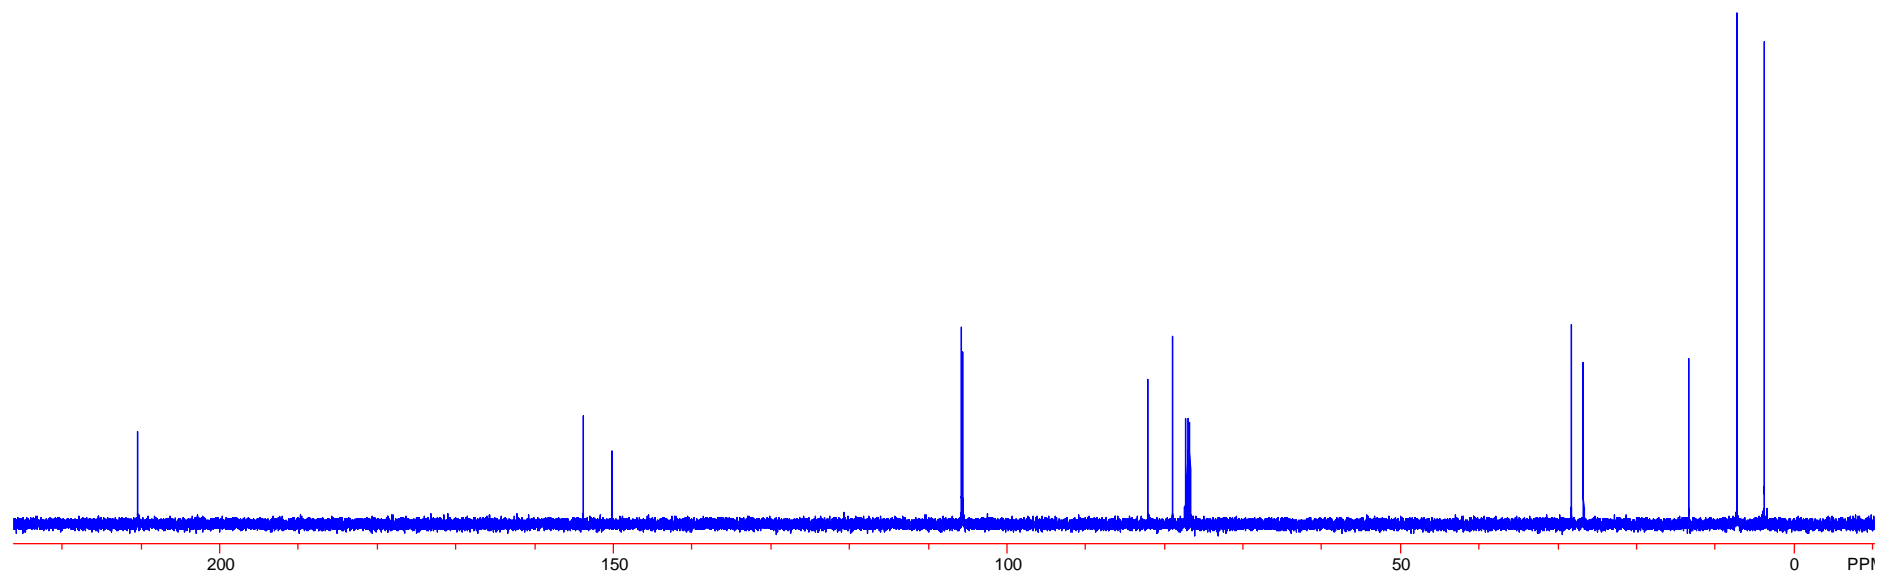

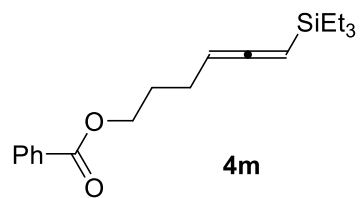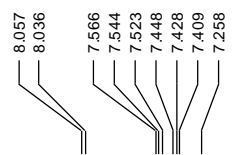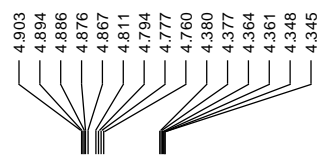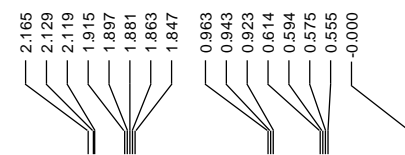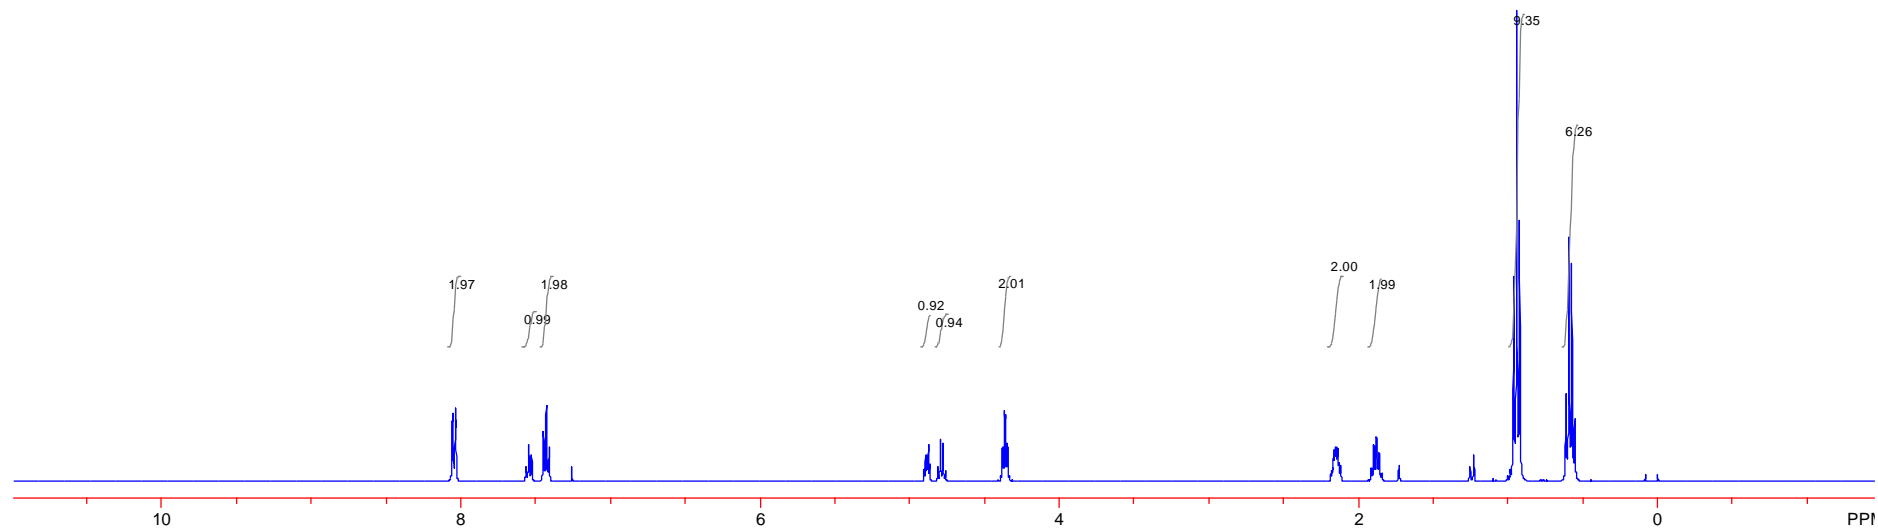

210.625

166.551

132.749  
130.395  
129.484  
128.247

81.706  
78.989  
77.319  
77.000  
76.681  
64.338

28.630  
24.485

7.216  
3.762

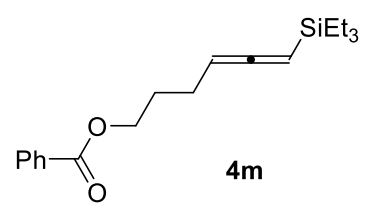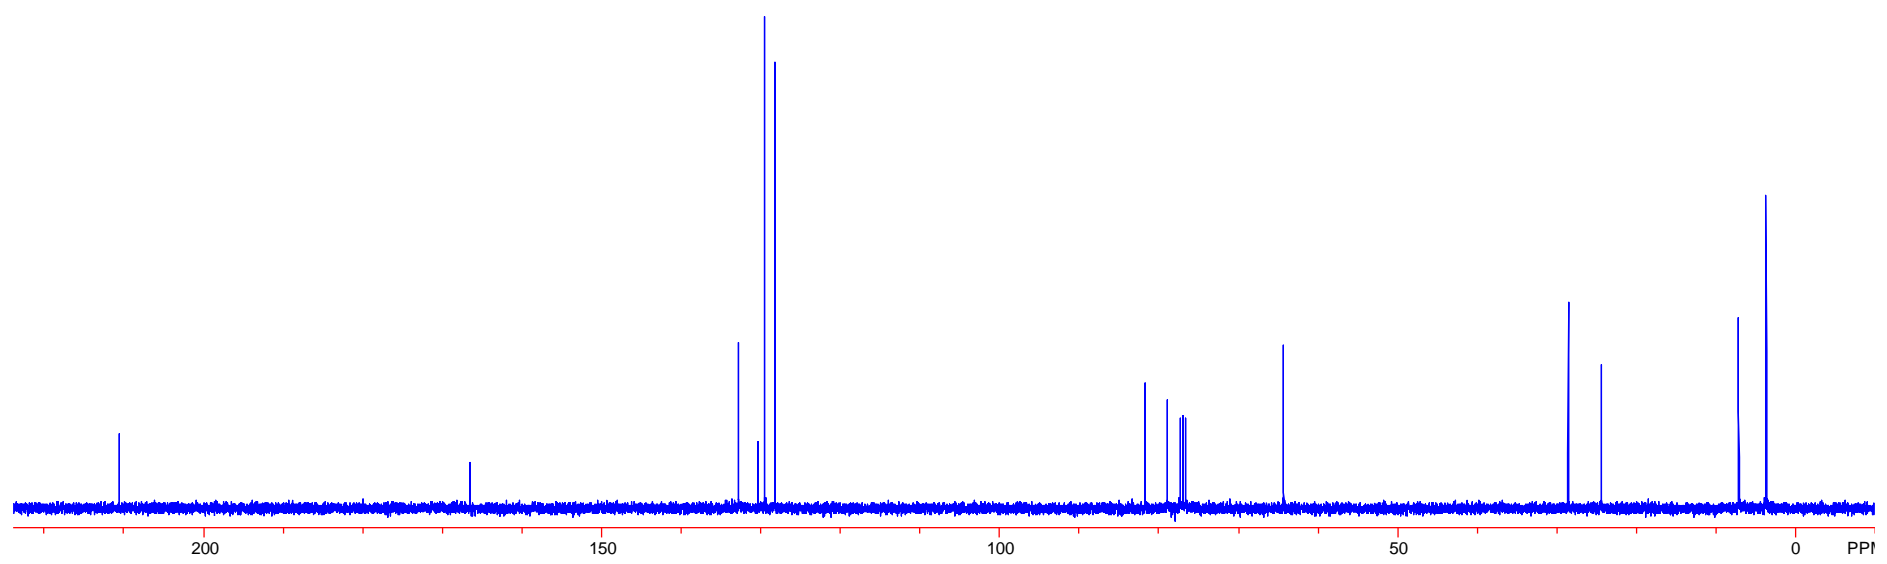

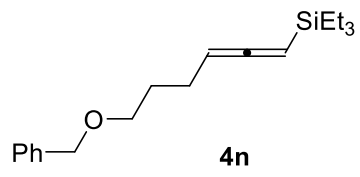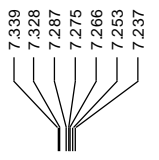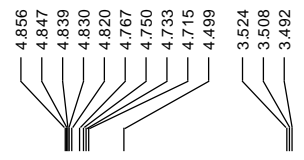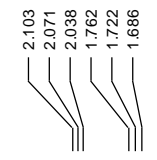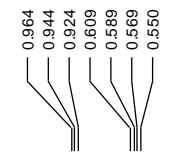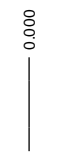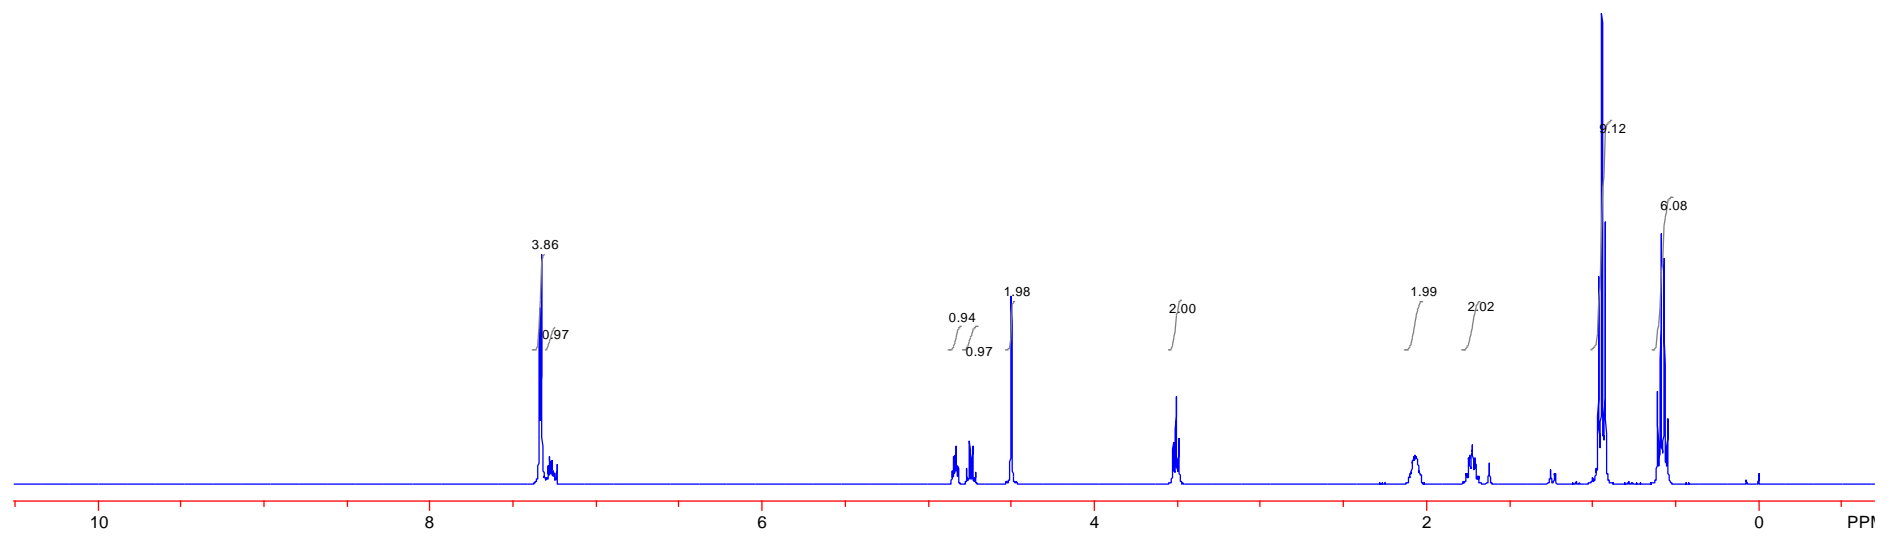

210.721

138.629

128.336

127.600

127.478

82.342

78.660

77.354

77.036

76.717

72.876

69.824

29.728

24.665

7.297

3.843

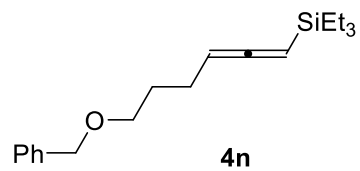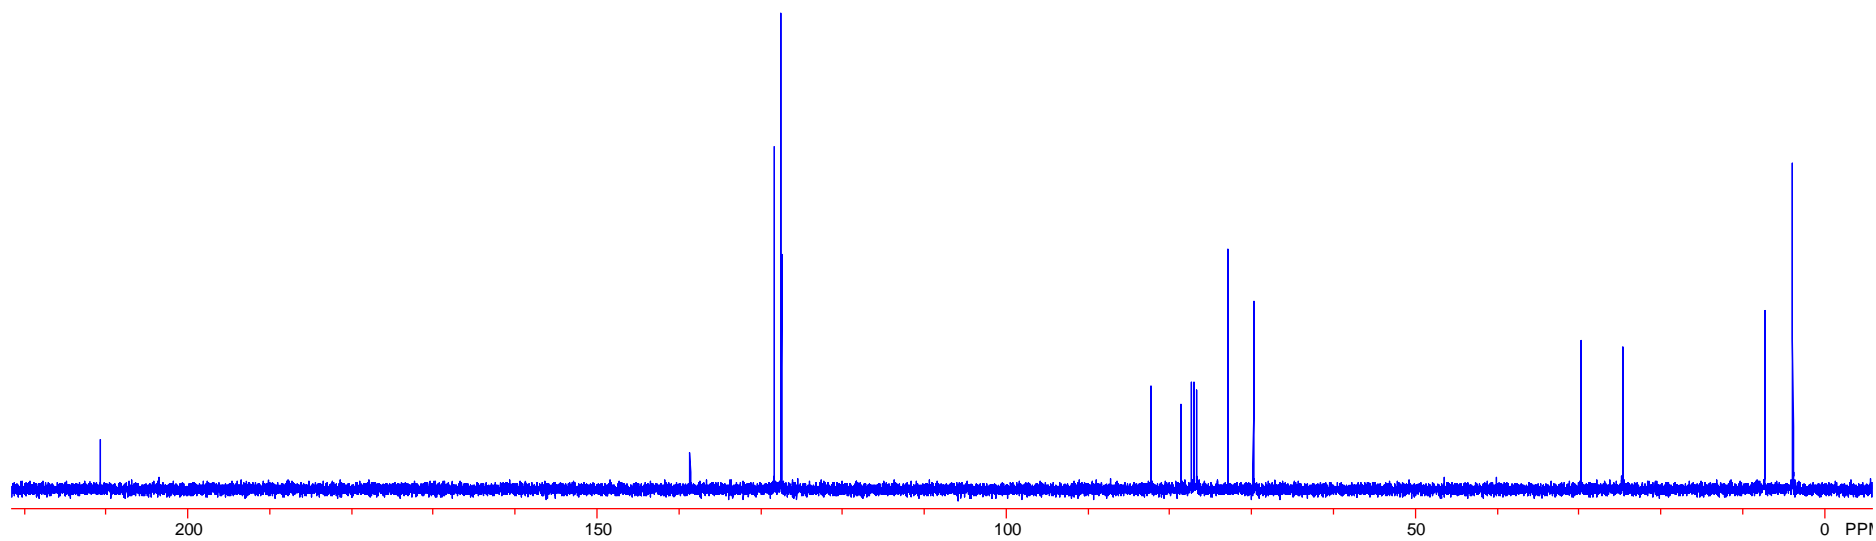

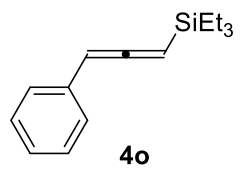

7.294  
7.274  
7.255  
7.241  
7.222  
7.147  
7.129  
7.112

5.851  
5.834

5.379  
5.361

0.998  
0.978  
0.958  
0.680  
0.661  
0.641  
0.621

0.000

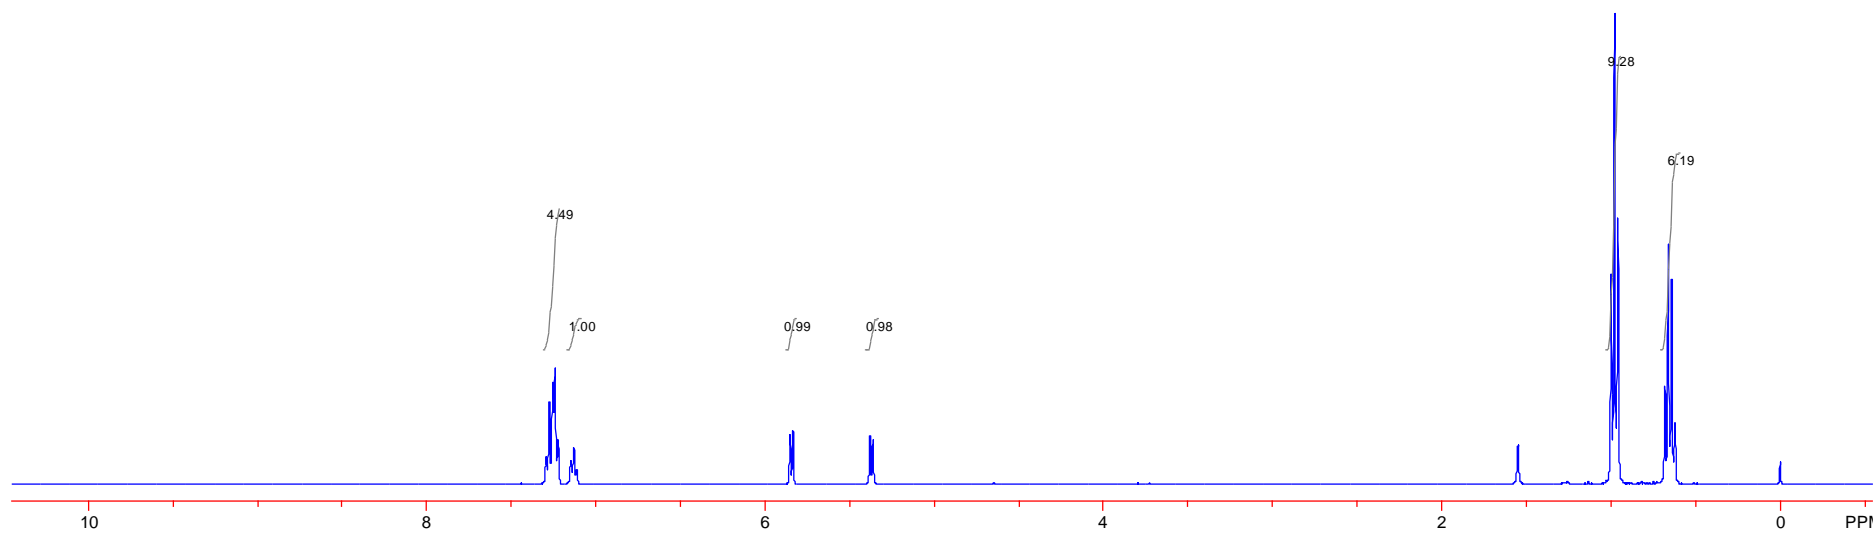

210.754

135.140

128.528

125.962

125.833

87.460

83.202

77.319

77.000

76.681

7.292

3.929

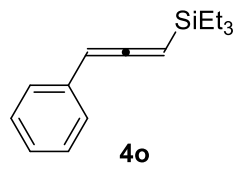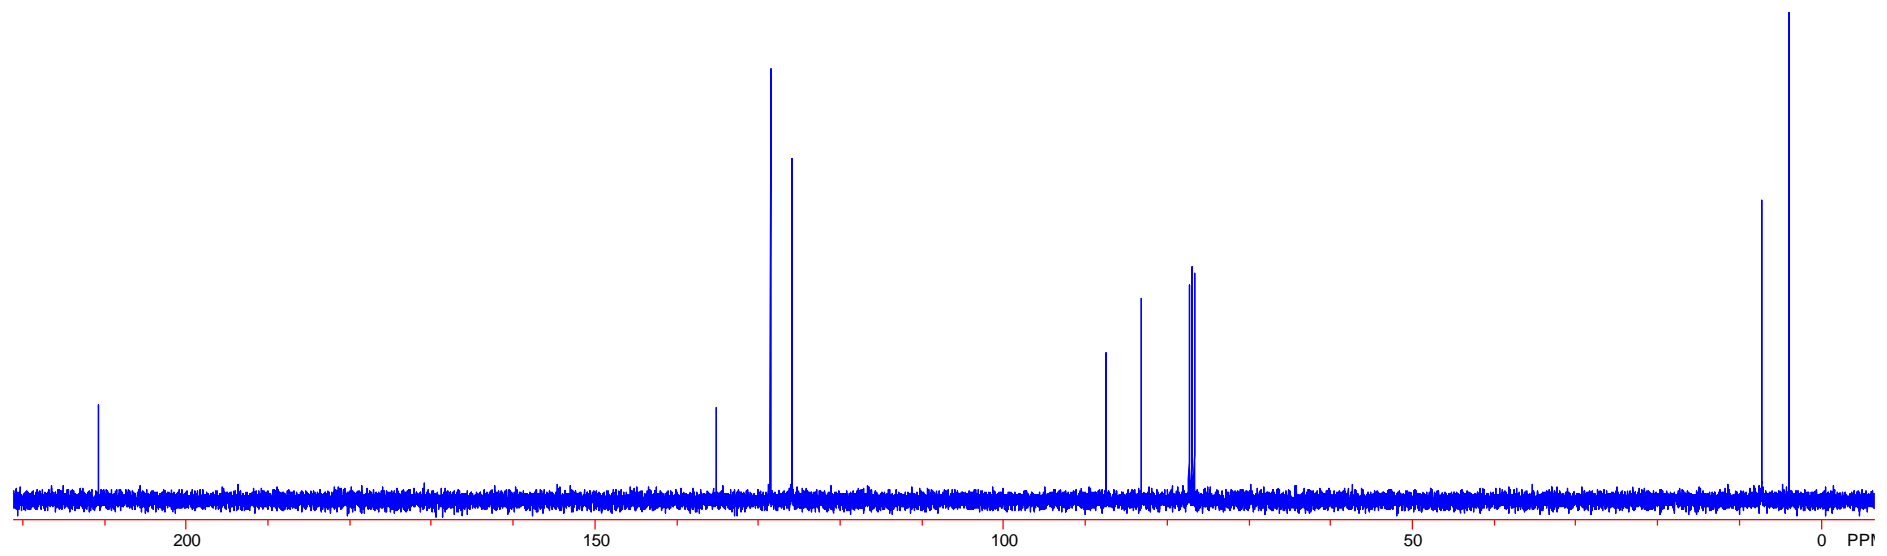



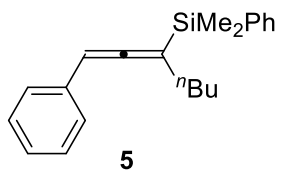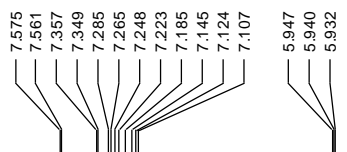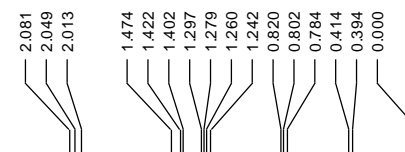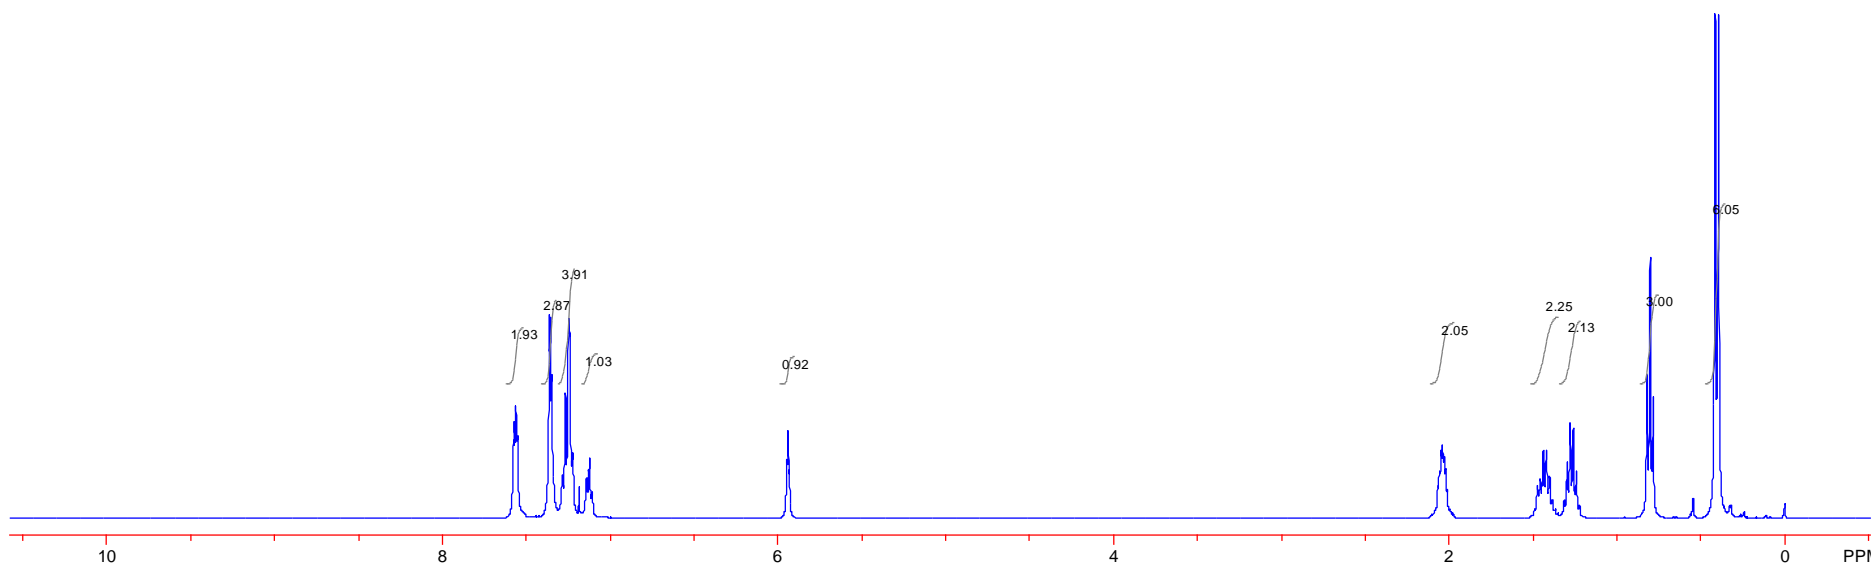

206.416

137.829  
136.005  
133.807  
129.163  
128.509  
127.795  
125.850  
125.822

100.033

90.443

77.315  
77.000  
76.681

31.268  
29.352

22.445

13.859

-2.864  
-2.937

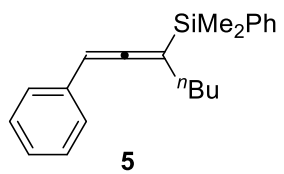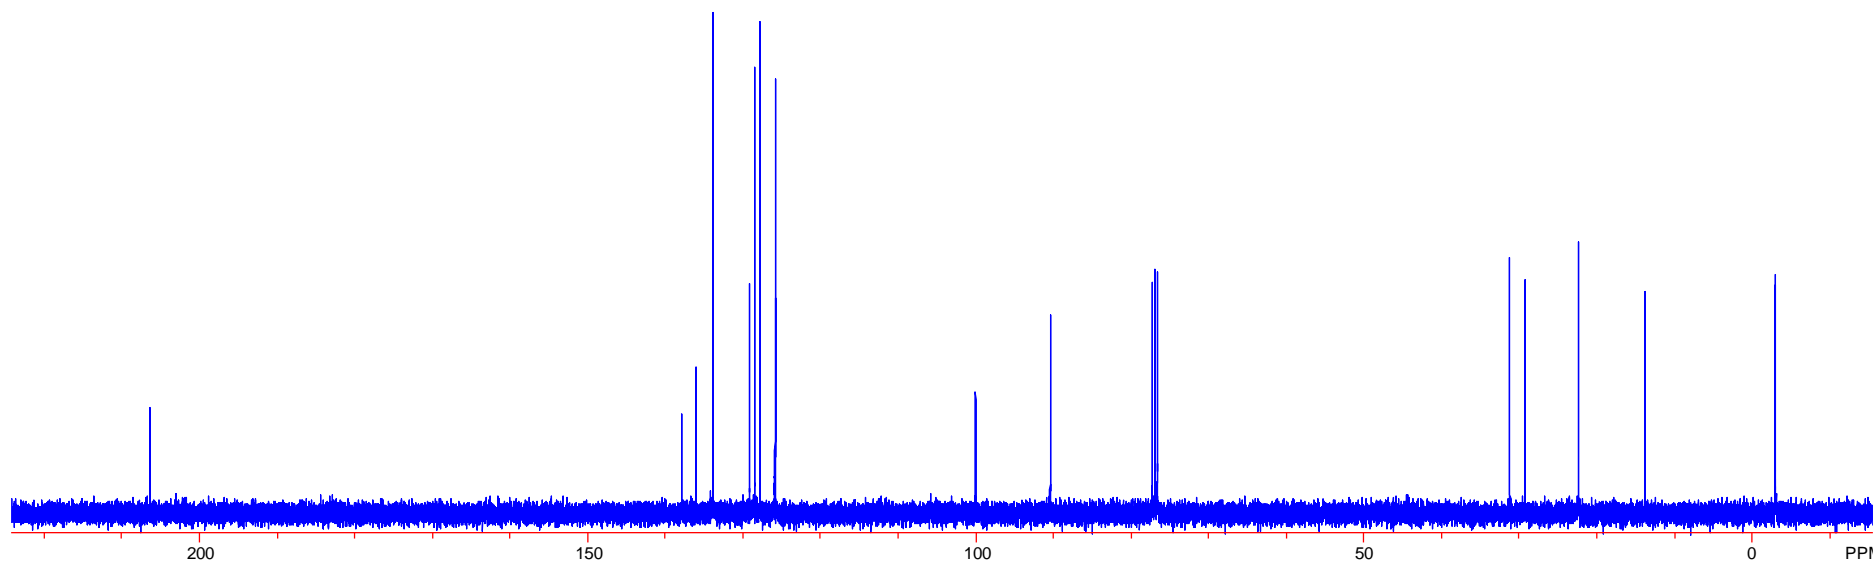

Supplement: d3qo00371j1.pdf [file d3qo00371j1.pdf]
